# Supplementary material for: Single Cell Transcriptomic Analysis in a Mouse Model of Barth Syndrome Reveals Cell-Specific Alterations in Gene Expression and Intercellular Communication
Source: Preprints.org preprint supplement (doi:10.20944/preprints202306.1603.v1), 2023-06-22
Supplement: Supplementary file 2 [file Supplemental Tables.xlsx]

## Sheet: ST1
Genotype	ADIPO	BLYMPH	CM	DC	EC	FB	LEC	MAC	MES	PC	SM	TLYMPH
KO	338	25	15875	41	3138	7630	374	3737	1005	1424	115	16
WT	197	56	17753	64	3982	10170	620	5275	727	2313	134	42

## Sheet: ST2
Gene	p_val	avg_log2FC	pct.1	pct.2	p_val_adj	celltype	group
AY036118	4.36e-29	2.83051	0.701	0.223	9.98e-25	ADIPO	upregulated
Acly	6.57e-19	2.39048	0.743	0.431	1.5e-14	ADIPO	upregulated
Fabp4	4.71e-17	1.29624	0.932	0.528	1.08e-12	ADIPO	upregulated
Elovl6	7.37e-14	1.66601	0.713	0.563	1.69e-09	ADIPO	upregulated
Nabp1	1.09e-13	1.04396	0.68	0.533	2.49e-09	ADIPO	upregulated
Gm35188	9.07e-13	0.794318	0.521	0.452	2.08e-08	ADIPO	upregulated
Dlat	2.98e-12	0.754274	0.731	0.721	6.82e-08	ADIPO	upregulated
Pfkfb3	7.75e-12	0.581542	0.858	0.873	1.78e-07	ADIPO	upregulated
Hk2	3.4e-11	1.39603	0.879	0.772	7.8e-07	ADIPO	upregulated
Kif13b	6.24e-11	-0.58529	0.391	0.731	1.43e-06	ADIPO	downregulated
Pim1	1.9e-10	1.20548	0.749	0.685	4.36e-06	ADIPO	upregulated
Mgat5	4.06e-10	-0.70744	0.257	0.665	9.31e-06	ADIPO	downregulated
Dcaf6	4.46e-10	0.625125	0.825	0.807	1.02e-05	ADIPO	upregulated
Mir100hg	8.95e-10	-0.71133	0.476	0.777	2.05e-05	ADIPO	downregulated
Agpat2	2.22e-09	0.790398	0.58	0.462	5.08e-05	ADIPO	upregulated
Pmepa1	4.06e-09	0.658921	0.58	0.584	9.3e-05	ADIPO	upregulated
Fasn	6.26e-09	1.80402	0.636	0.234	0.000144	ADIPO	upregulated
Thrsp	7.31e-09	1.43891	0.784	0.421	0.000168	ADIPO	upregulated
Insig1	9.48e-09	0.912471	0.414	0.32	0.000217	ADIPO	upregulated
Abca6	9.75e-09	-0.75072	0.053	0.381	0.000223	ADIPO	downregulated
C1qtnf7	1.33e-08	-0.876	0.033	0.299	0.000304	ADIPO	downregulated
Tnik	1.48e-08	-0.5984	0.169	0.467	0.000339	ADIPO	downregulated
Lrrk1	1.64e-08	-0.58626	0.136	0.437	0.000375	ADIPO	downregulated
Mgll	2.47e-08	-0.58831	0.678	0.904	0.000567	ADIPO	downregulated
Tenm4	3.88e-279	4.18932	0.845	0.001	8.89e-275	CM	upregulated
Vmn2r3	3.76e-264	1.66224	0.591	0	8.62e-260	CM	upregulated
Trib3	5.82e-227	0.810494	0.349	0.001	1.33e-222	CM	upregulated
Sorbs2os	2.74e-205	1.54065	0.893	0.748	6.28e-201	CM	upregulated
Fam129a	3.24e-203	1.70799	0.652	0.074	7.42e-199	CM	upregulated
Fam227b	7.17e-189	1.68352	0.459	0.029	1.64e-184	CM	upregulated
Soat2	3.34e-176	0.701749	0.327	0	7.65e-172	CM	upregulated
Pvt1	4.67e-176	1.9809	0.704	0.094	1.07e-171	CM	upregulated
Jcad	1.85e-167	1.46901	0.538	0.034	4.24e-163	CM	upregulated
Ern1	4.49e-163	1.25976	0.638	0.332	1.03e-158	CM	upregulated
Agap1	2.55e-160	1.62349	0.877	0.616	5.85e-156	CM	upregulated
Enah	5.41e-155	1.46757	0.902	0.796	1.24e-150	CM	upregulated
Gars	6.84e-147	0.892197	0.403	0.071	1.57e-142	CM	upregulated
Slc24a2	2.46e-143	2.04651	0.639	0.056	5.65e-139	CM	upregulated
Fgf7	2.44e-140	0.823137	0.287	0.024	5.6e-136	CM	upregulated
Lhfpl2	4.05e-139	0.973166	0.319	0.027	9.29e-135	CM	upregulated
Cebpg	1.88e-137	0.756056	0.422	0.088	4.31e-133	CM	upregulated
Nav2	6.88e-137	-1.10022	0.746	0.941	1.58e-132	CM	downregulated
Nars	2.8e-135	0.806863	0.394	0.076	6.4e-131	CM	upregulated
Tfcp2l1	1.1e-132	0.604724	0.287	0.004	2.51e-128	CM	upregulated
Map1b	4.46e-130	0.768281	0.3	0.052	1.02e-125	CM	upregulated
Gm13601	6.89e-130	0.772305	0.422	0.251	1.58e-125	CM	upregulated
Arhgef2	8.73e-130	1.06167	0.524	0.109	2e-125	CM	upregulated
Stard5	5.76e-129	0.594489	0.291	0.062	1.32e-124	CM	upregulated
Dennd4a	1.15e-128	0.826279	0.393	0.102	2.64e-124	CM	upregulated
Ccnd2	7.76e-128	0.898868	0.425	0.114	1.78e-123	CM	upregulated
Limch1	1.28e-127	-1.43592	0.799	0.971	2.94e-123	CM	downregulated
Gm15414	1.5e-124	0.981785	0.345	0	3.44e-120	CM	upregulated
Ptprt	3.89e-124	1.76235	0.37	0.009	8.91e-120	CM	upregulated
Slc7a11	7.06e-116	0.638627	0.254	0.015	1.62e-111	CM	upregulated
Zfp568	9.29e-116	1.13909	0.734	0.419	2.13e-111	CM	upregulated
Dlg2	4.14e-115	0.849321	0.333	0.098	9.48e-111	CM	upregulated
Atf6	8.28e-110	1.05432	0.9	0.766	1.9e-105	CM	upregulated
A830018L16Rik	4.52e-109	0.667544	0.232	0.003	1.04e-104	CM	upregulated
Xpot	1.1e-108	0.916259	0.552	0.224	2.53e-104	CM	upregulated
Glce	8.38e-108	0.804535	0.412	0.136	1.92e-103	CM	upregulated
Aldh1l2	6.68e-107	0.722819	0.363	0.047	1.53e-102	CM	upregulated
Hadhb	1.85e-106	-0.66511	0.478	0.732	4.24e-102	CM	downregulated
Eprs	6.71e-105	1.53732	0.762	0.359	1.54e-100	CM	upregulated
Lars	1.68e-103	1.16797	0.674	0.336	3.84e-99	CM	upregulated
Lrrc4	1.74e-99	1.61789	0.783	0.379	3.98e-95	CM	upregulated
Slc7a1	2.27e-99	0.949017	0.513	0.184	5.19e-95	CM	upregulated
Acsl1	1.35e-97	-0.91919	0.691	0.91	3.09e-93	CM	downregulated
Ankrd1	7.23e-96	1.42402	0.71	0.346	1.66e-91	CM	upregulated
Kctd16	1.62e-94	2.02424	0.645	0.135	3.71e-90	CM	upregulated
Rtn4	3.02e-94	0.973269	0.459	0.169	6.93e-90	CM	upregulated
Gm20618	1.69e-92	0.665742	0.292	0.003	3.87e-88	CM	upregulated
Gm24474	1.88e-92	-1.93426	0.116	0.736	4.32e-88	CM	downregulated
Iars	1.52e-90	0.944824	0.58	0.235	3.49e-86	CM	upregulated
Mei4	1.42e-88	0.653217	0.231	0.002	3.26e-84	CM	upregulated
Myo5a	1.25e-86	0.603371	0.305	0.106	2.86e-82	CM	upregulated
Phldb2	1.06e-85	1.17272	0.685	0.339	2.44e-81	CM	upregulated
Deptor	1.18e-83	0.724278	0.419	0.119	2.7e-79	CM	upregulated
Hadha	3.45e-82	-0.63382	0.629	0.824	7.91e-78	CM	downregulated
Ddr2	1.83e-80	0.689175	0.329	0.08	4.19e-76	CM	upregulated
Grb10	2.34e-78	0.845239	0.781	0.599	5.35e-74	CM	upregulated
Mast4	4.36e-78	0.920576	0.711	0.361	1e-73	CM	upregulated
Trabd2b	2.38e-77	-1.51444	0.576	0.907	5.44e-73	CM	downregulated
Zfp385b	4.87e-77	1.38368	0.842	0.558	1.12e-72	CM	upregulated
Ssbp2	2.14e-76	0.779492	0.788	0.641	4.91e-72	CM	upregulated
Slc27a1	9.4e-76	-0.79419	0.537	0.815	2.15e-71	CM	downregulated
Lpl	9.41e-76	-1.31127	0.452	0.851	2.15e-71	CM	downregulated
Acaa2	2.67e-75	-0.92416	0.096	0.483	6.11e-71	CM	downregulated
Myl2	2.72e-75	-1.44897	0.226	0.567	6.23e-71	CM	downregulated
Astn2	7.27e-75	1.68511	0.699	0.196	1.67e-70	CM	upregulated
Eif2s2	7.97e-75	1.07411	0.559	0.171	1.82e-70	CM	upregulated
Zbtb38	3.12e-74	0.843015	0.782	0.622	7.15e-70	CM	upregulated
Yars	1.32e-73	1.10987	0.635	0.248	3.02e-69	CM	upregulated
Brca2	4.76e-73	0.637363	0.338	0.066	1.09e-68	CM	upregulated
Gm26917	9.13e-72	0.613266	0.667	0.585	2.09e-67	CM	upregulated
Gm12092	1.22e-69	1.00766	0.613	0.274	2.8e-65	CM	upregulated
Sorbs2	3.17e-69	0.592588	0.983	0.976	7.26e-65	CM	upregulated
Fgfr2	4.27e-69	0.88767	0.94	0.922	9.79e-65	CM	upregulated
N4bp2l1	9.13e-68	0.80679	0.483	0.184	2.09e-63	CM	upregulated
Gm26862	1.03e-67	-1.78385	0.069	0.708	2.36e-63	CM	downregulated
Cyp27a1	2.91e-67	0.619214	0.367	0.131	6.66e-63	CM	upregulated
Smtn	4.85e-67	-1.06253	0.567	0.892	1.11e-62	CM	downregulated
Tmem144	8.64e-67	0.688734	0.528	0.314	1.98e-62	CM	upregulated
Fancc	8.78e-67	0.620748	0.5	0.303	2.01e-62	CM	upregulated
Gask1b	1.11e-66	0.621963	0.253	0.073	2.53e-62	CM	upregulated
Hsdl2	2.02e-66	-0.59364	0.38	0.628	4.63e-62	CM	downregulated
Txnip	4.08e-66	-0.85748	0.393	0.755	9.34e-62	CM	downregulated
4933431K23Rik	6.04e-66	1.51987	0.715	0.311	1.38e-61	CM	upregulated
Gm31013	2.97e-65	-0.70736	0.345	0.622	6.81e-61	CM	downregulated
Zfc3h1	1.6e-64	0.883915	0.68	0.431	3.66e-60	CM	upregulated
Hs3st5	4.07e-64	-1.18126	0.69	0.908	9.33e-60	CM	downregulated
Abcc4	1.1e-63	0.997422	0.516	0.247	2.51e-59	CM	upregulated
Supt16	5.2e-63	1.40797	0.299	0.239	1.19e-58	CM	upregulated
Dcp1b	4.61e-62	1.11719	0.806	0.624	1.06e-57	CM	upregulated
Acacb	1.05e-61	-0.6249	0.821	0.936	2.41e-57	CM	downregulated
Rpl3l	3.5e-61	-1.48782	0.125	0.711	8.03e-57	CM	downregulated
Hspa9	5.35e-61	1.05447	0.659	0.341	1.23e-56	CM	upregulated
Acadm	2.42e-59	-0.64459	0.489	0.731	5.55e-55	CM	downregulated
Gm35188	5.37e-58	0.762262	0.596	0.398	1.23e-53	CM	upregulated
Rbfox1	8.62e-58	-1.43235	0.435	0.876	1.98e-53	CM	downregulated
Ppfibp1	1.31e-57	0.877544	0.617	0.346	3.01e-53	CM	upregulated
Slc38a1	2.17e-57	0.596879	0.329	0.091	4.98e-53	CM	upregulated
Gm13938	2.53e-57	0.70859	0.494	0.209	5.79e-53	CM	upregulated
Nfe2l2	6.63e-57	0.595664	0.645	0.494	1.52e-52	CM	upregulated
Bri3	8.09e-57	0.786023	0.517	0.279	1.85e-52	CM	upregulated
Gm42418	8.5e-57	-1.11436	0.44	0.652	1.95e-52	CM	downregulated
Herpud1	2.04e-56	0.743346	0.484	0.248	4.67e-52	CM	upregulated
Cdv3	2.07e-56	0.641878	0.412	0.185	4.75e-52	CM	upregulated
Taf1d	3.86e-56	1.00645	0.763	0.52	8.85e-52	CM	upregulated
Phyhd1	4.89e-56	0.69662	0.799	0.659	1.12e-51	CM	upregulated
Atp6v1h	6.25e-56	1.01319	0.615	0.388	1.43e-51	CM	upregulated
Gm20757	2.18e-55	-1.26784	0.055	0.531	5.01e-51	CM	downregulated
Gm16599	4.08e-55	0.651621	0.596	0.422	9.36e-51	CM	upregulated
Tmem189	4.9e-55	0.768832	0.471	0.207	1.12e-50	CM	upregulated
Kcnd2	9.72e-54	-1.1459	0.75	0.926	2.23e-49	CM	downregulated
Kcnj3	2.29e-53	-1.2634	0.395	0.868	5.24e-49	CM	downregulated
Tox3	8.92e-53	0.615615	0.422	0.25	2.04e-48	CM	upregulated
Platr31	1.02e-52	0.596748	0.416	0.201	2.35e-48	CM	upregulated
Itgb6	6.88e-52	-1.05846	0.461	0.795	1.58e-47	CM	downregulated
Gm16068	4.12e-51	0.713209	0.539	0.296	9.43e-47	CM	upregulated
1600010M07Rik	4.79e-51	0.618313	0.525	0.344	1.1e-46	CM	upregulated
Ghr	6.94e-51	-0.86227	0.817	0.947	1.59e-46	CM	downregulated
Gm26632	9.08e-51	1.07712	0.737	0.498	2.08e-46	CM	upregulated
Adra1a	1.28e-50	-1.02107	0.343	0.703	2.92e-46	CM	downregulated
Pdk4	2.22e-50	-1.29874	0.335	0.501	5.09e-46	CM	downregulated
Prkg1	5.13e-50	-0.65871	0.807	0.901	1.17e-45	CM	downregulated
Fgf1	8.33e-50	-0.7174	0.751	0.908	1.91e-45	CM	downregulated
Unc13b	8.81e-50	0.7072	0.435	0.158	2.02e-45	CM	upregulated
Adamts6	1.17e-49	0.937867	0.741	0.572	2.68e-45	CM	upregulated
Flnc	1.62e-49	0.805332	0.533	0.356	3.72e-45	CM	upregulated
Adra1b	2.96e-49	-0.89664	0.113	0.467	6.79e-45	CM	downregulated
Atp1a2	3.99e-49	-0.74062	0.379	0.694	9.14e-45	CM	downregulated
Rap1gap2	4.97e-49	0.702928	0.709	0.57	1.14e-44	CM	upregulated
Itpr1	3.57e-48	-0.66837	0.646	0.848	8.17e-44	CM	downregulated
Il6st	3.02e-47	0.892035	0.58	0.296	6.93e-43	CM	upregulated
Klf12	2.79e-46	-1.00908	0.491	0.82	6.39e-42	CM	downregulated
Gm47283	5.93e-46	1.14998	0.627	0.393	1.36e-41	CM	upregulated
Gm13481	7.35e-46	1.48786	0.898	0.525	1.68e-41	CM	upregulated
Gm29237	1.14e-45	1.10673	0.714	0.387	2.61e-41	CM	upregulated
Pdlim5	1.45e-45	0.738823	0.981	0.96	3.33e-41	CM	upregulated
Sned1	2.8e-45	-0.7161	0.193	0.546	6.41e-41	CM	downregulated
Atcayos	4.9e-45	-1.02313	0.649	0.899	1.12e-40	CM	downregulated
Cux2	8.84e-45	-0.76607	0.26	0.595	2.02e-40	CM	downregulated
Gm35438.1	9.36e-45	0.870576	0.543	0.34	2.14e-40	CM	upregulated
Sars	6.26e-44	0.6951	0.376	0.101	1.43e-39	CM	upregulated
Gm16093	7.06e-44	0.689834	0.541	0.342	1.62e-39	CM	upregulated
Epb41	7.74e-44	0.771425	0.898	0.86	1.77e-39	CM	upregulated
Kcnq1ot1	1e-43	0.809145	0.79	0.655	2.3e-39	CM	upregulated
Tbc1d4	1.52e-43	-0.60776	0.819	0.933	3.49e-39	CM	downregulated
Chrm2	1.66e-43	-1.00123	0.73	0.936	3.81e-39	CM	downregulated
Rora	4.72e-42	-1.04238	0.732	0.921	1.08e-37	CM	downregulated
Rhbdd1	1.07e-41	0.586798	0.463	0.257	2.46e-37	CM	upregulated
Hecw2	3.19e-41	0.691861	0.708	0.496	7.32e-37	CM	upregulated
Ppm1k	3.2e-41	-0.64957	0.148	0.471	7.33e-37	CM	downregulated
Cdh4	4.38e-41	0.941105	0.529	0.246	1e-36	CM	upregulated
Lnx1	4.96e-41	1.03862	0.577	0.309	1.14e-36	CM	upregulated
Lpin1	5.2e-41	-1.01309	0.418	0.757	1.19e-36	CM	downregulated
D830032E09Rik	1.02e-40	-0.61096	0.669	0.825	2.34e-36	CM	downregulated
Angpt1	1.41e-40	-1.41173	0.23	0.638	3.23e-36	CM	downregulated
Gm47644	1.88e-40	0.612123	0.655	0.536	4.31e-36	CM	upregulated
Pdzrn4	3.7e-40	-1.26699	0.203	0.597	8.47e-36	CM	downregulated
Camk1d	4.89e-40	-0.98747	0.408	0.629	1.12e-35	CM	downregulated
Polr3h	5.76e-40	0.655975	0.58	0.392	1.32e-35	CM	upregulated
Ppm1e	7.73e-40	1.05719	0.66	0.344	1.77e-35	CM	upregulated
Sobp	1.01e-39	-0.70777	0.449	0.716	2.31e-35	CM	downregulated
Foxn3	1.21e-39	-0.71628	0.754	0.92	2.76e-35	CM	downregulated
Med12l	1.59e-39	-0.9111	0.267	0.655	3.65e-35	CM	downregulated
Snap91	4.43e-39	0.772517	0.463	0.196	1.01e-34	CM	upregulated
Mir100hg	5.83e-39	-1.02318	0.16	0.547	1.34e-34	CM	downregulated
Gm48678	6.07e-39	0.632378	0.478	0.303	1.39e-34	CM	upregulated
Lars2	7.21e-39	-0.94914	0.23	0.546	1.65e-34	CM	downregulated
Hdac4	8.36e-39	-0.84784	0.46	0.757	1.92e-34	CM	downregulated
Lysmd4	8.88e-39	0.752688	0.688	0.513	2.04e-34	CM	upregulated
Trp53inp1	2.4e-38	0.802026	0.436	0.141	5.51e-34	CM	upregulated
Eno3	3.76e-38	-0.70864	0.075	0.407	8.61e-34	CM	downregulated
Tex22	4.65e-38	1.17204	0.246	0.023	1.07e-33	CM	upregulated
Gm30382	5.27e-38	-1.16446	0.42	0.796	1.21e-33	CM	downregulated
Cradd	1e-37	-0.65713	0.531	0.722	2.3e-33	CM	downregulated
Ednra	6.21e-37	1.48402	0.817	0.498	1.42e-32	CM	upregulated
Gm35330	9.2e-37	-1.01211	0.606	0.82	2.11e-32	CM	downregulated
Gabrg3	1.31e-36	0.835009	0.254	0.016	3e-32	CM	upregulated
Setbp1	1.7e-36	-1.01184	0.617	0.882	3.9e-32	CM	downregulated
Dlc1	2.74e-36	-0.97725	0.7	0.921	6.29e-32	CM	downregulated
Prune2	3.17e-36	0.885633	0.926	0.869	7.26e-32	CM	upregulated
Gm36372	4.45e-36	-0.83212	0.206	0.567	1.02e-31	CM	downregulated
Fign	6.16e-36	-0.65701	0.575	0.797	1.41e-31	CM	downregulated
Lama2	9.15e-36	-0.72512	0.791	0.936	2.1e-31	CM	downregulated
Ccdc73	2.4e-35	0.672151	0.438	0.209	5.5e-31	CM	upregulated
5330438D12Rik	3.19e-35	0.71401	0.561	0.363	7.3e-31	CM	upregulated
Tmtc1	4.48e-35	-1.22117	0.383	0.806	1.03e-30	CM	downregulated
Gm32027	4.77e-35	-0.98062	0.336	0.689	1.09e-30	CM	downregulated
Prrg1	1.58e-34	-0.70149	0.166	0.437	3.63e-30	CM	downregulated
Crhr2	1.92e-34	-0.73097	0.119	0.5	4.39e-30	CM	downregulated
Pdzrn3	3.59e-34	-1.38393	0.378	0.797	8.23e-30	CM	downregulated
Clpb	4.03e-34	0.581436	0.543	0.367	9.24e-30	CM	upregulated
Gm11266	1.51e-33	-0.6506	0.263	0.55	3.47e-29	CM	downregulated
Snd1	1.13e-32	0.911009	0.857	0.722	2.58e-28	CM	upregulated
Actn4	1.86e-32	0.756772	0.497	0.274	4.26e-28	CM	upregulated
Pam	2.01e-32	0.777269	0.888	0.796	4.61e-28	CM	upregulated
Clcn1	2.65e-32	-0.60687	0.019	0.323	6.07e-28	CM	downregulated
Fstl4	3.87e-32	0.59049	0.51	0.314	8.87e-28	CM	upregulated
Sh3rf2	1.9e-31	-0.71398	0.227	0.503	4.36e-27	CM	downregulated
Nrp1	2.62e-31	-1.21114	0.494	0.852	6e-27	CM	downregulated
Art1	3.59e-31	-0.84117	0.666	0.895	8.23e-27	CM	downregulated
Myh7b	3.98e-31	-0.60686	0.584	0.778	9.13e-27	CM	downregulated
9530026P05Rik	1.34e-30	-0.68273	0.585	0.791	3.06e-26	CM	downregulated
Vezt	1.45e-30	0.608899	0.593	0.408	3.32e-26	CM	upregulated
Emc7	1.46e-30	1.03632	0.395	0.241	3.36e-26	CM	upregulated
Cpeb1	1.67e-30	0.582656	0.632	0.49	3.82e-26	CM	upregulated
Galnt17	2.55e-30	-0.75133	0.128	0.413	5.83e-26	CM	downregulated
Colq	2.71e-30	-0.66996	0.036	0.289	6.22e-26	CM	downregulated
Myom2	4.98e-30	-0.78413	0.558	0.825	1.14e-25	CM	downregulated
Camta1	1.16e-29	-0.7002	0.817	0.926	2.66e-25	CM	downregulated
Hexb	1.94e-29	-0.7352	0.167	0.459	4.45e-25	CM	downregulated
Lrrc3b	1.98e-29	-0.8849	0.399	0.7	4.54e-25	CM	downregulated
Gm20631	2.9e-29	0.938919	0.535	0.266	6.64e-25	CM	upregulated
Ammecr1	3.92e-29	0.664923	0.689	0.535	8.98e-25	CM	upregulated
Fgf14	4.96e-29	-1.73535	0.216	0.623	1.14e-24	CM	downregulated
Arap2	5.54e-29	-0.60999	0.207	0.506	1.27e-24	CM	downregulated
Mhrt	9.91e-29	-0.69983	0.935	0.976	2.27e-24	CM	downregulated
Bach2	1.98e-28	-0.58312	0.28	0.548	4.54e-24	CM	downregulated
Grm1	2.51e-28	-0.67392	0.786	0.86	5.75e-24	CM	downregulated
Grk5	4.01e-28	1.22663	0.785	0.427	9.18e-24	CM	upregulated
Tnik	4.6e-28	-0.67386	0.704	0.863	1.05e-23	CM	downregulated
Hnrnpa3	1.42e-27	0.644369	0.581	0.386	3.25e-23	CM	upregulated
Gm20619	1.67e-27	-0.79729	0.646	0.867	3.82e-23	CM	downregulated
Auts2	3.41e-27	-0.81842	0.852	0.963	7.82e-23	CM	downregulated
Sltm	4.14e-27	0.767973	0.852	0.765	9.48e-23	CM	upregulated
Syne1	4.69e-27	0.839378	0.816	0.659	1.08e-22	CM	upregulated
Tcap	1.68e-26	-0.98132	0.159	0.513	3.85e-22	CM	downregulated
Sntb1	1.92e-26	0.993382	0.393	0.077	4.4e-22	CM	upregulated
Tnni3	3.03e-26	-1.00238	0.14	0.397	6.94e-22	CM	downregulated
Arhgap6	4.99e-26	-0.6997	0.387	0.636	1.14e-21	CM	downregulated
D830024N08Rik	1.15e-25	-0.62348	0.465	0.715	2.63e-21	CM	downregulated
Picalm	1.45e-25	0.743607	0.744	0.641	3.31e-21	CM	upregulated
Gm35041	1.87e-25	-0.98475	0.104	0.443	4.28e-21	CM	downregulated
Slco3a1	3.32e-25	-0.95713	0.511	0.806	7.62e-21	CM	downregulated
Ucp3	4.78e-25	-0.60418	0.222	0.446	1.09e-20	CM	downregulated
Lama5	5.05e-25	-0.62771	0.184	0.491	1.16e-20	CM	downregulated
Atp5a1	1.43e-24	-0.66686	0.179	0.428	3.27e-20	CM	downregulated
Pde4d	1.47e-24	-0.64827	0.967	0.986	3.38e-20	CM	downregulated
Plekha6	1.85e-24	-0.83526	0.459	0.763	4.23e-20	CM	downregulated
Atp11a	4.01e-24	0.675799	0.645	0.465	9.18e-20	CM	upregulated
Mir133a-1hg	8.06e-24	-0.69218	0.663	0.838	1.85e-19	CM	downregulated
Ripor2	3.81e-23	-0.74299	0.24	0.465	8.73e-19	CM	downregulated
Ctnnal1	2.24e-22	0.638833	0.439	0.256	5.14e-18	CM	upregulated
Cfap61	3.12e-22	-0.65303	0.051	0.343	7.16e-18	CM	downregulated
Apex2	8.06e-22	-0.64316	0.336	0.516	1.85e-17	CM	downregulated
Pfkfb1	1.11e-21	-0.60714	0.13	0.371	2.55e-17	CM	downregulated
Pdgfd	1.61e-21	-0.69129	0.099	0.329	3.69e-17	CM	downregulated
Synpo2	2.23e-21	-0.82555	0.719	0.903	5.1e-17	CM	downregulated
Rcsd1	2.48e-21	-0.64138	0.365	0.658	5.68e-17	CM	downregulated
Gse1	3.57e-21	-0.68553	0.674	0.857	8.18e-17	CM	downregulated
Wnk2	4.34e-21	-0.88357	0.418	0.753	9.95e-17	CM	downregulated
Mlxipl	6.88e-21	-0.646	0.287	0.575	1.58e-16	CM	downregulated
Ltbp1	1.7e-20	-0.74245	0.355	0.67	3.9e-16	CM	downregulated
Csrp3	3.06e-20	-0.79897	0.255	0.618	7.01e-16	CM	downregulated
A330102I10Rik	4.35e-20	0.618059	0.372	0.134	9.97e-16	CM	upregulated
Lrmda	7.8e-20	0.668381	0.529	0.333	1.79e-15	CM	upregulated
Ccbe1	1e-19	-0.91547	0.034	0.349	2.29e-15	CM	downregulated
Myl3	2.1e-19	-1.40412	0.104	0.393	4.82e-15	CM	downregulated
Gm32369	2.88e-19	-0.58268	0.035	0.293	6.59e-15	CM	downregulated
Nr4a1	3.03e-19	-0.80955	0.089	0.319	6.94e-15	CM	downregulated
Rp1	4.19e-19	-0.63226	0.039	0.23	9.59e-15	CM	downregulated
Lhfp	4.99e-19	-0.62273	0.33	0.56	1.14e-14	CM	downregulated
Ank	3.15e-18	-0.61312	0.841	0.925	7.21e-14	CM	downregulated
Acyp2	6.48e-18	-0.66353	0.874	0.947	1.48e-13	CM	downregulated
Phkg1	9.16e-18	-0.90221	0.138	0.561	2.1e-13	CM	downregulated
Palld	1.39e-17	-0.97321	0.947	0.986	3.18e-13	CM	downregulated
Zfp950	2.38e-17	0.715606	0.736	0.559	5.45e-13	CM	upregulated
Sorcs2	9.5e-17	-0.70656	0.099	0.419	2.18e-12	CM	downregulated
Ext1	9.86e-17	-1.05488	0.395	0.727	2.26e-12	CM	downregulated
Sec24d	7.12e-16	0.628518	0.757	0.645	1.63e-11	CM	upregulated
Rasef	8.88e-16	0.692433	0.161	0.044	2.03e-11	CM	upregulated
Gm31251	1.1e-15	-0.63256	0.926	0.969	2.52e-11	CM	downregulated
Ptprm	1.75e-15	-0.63367	0.885	0.961	4e-11	CM	downregulated
Prpf4b	2.27e-15	1.10212	0.897	0.755	5.2e-11	CM	upregulated
Mitf	2.44e-15	-0.65874	0.828	0.936	5.6e-11	CM	downregulated
Pknox2	3.25e-14	-0.61659	0.057	0.335	7.45e-10	CM	downregulated
Ypel2	5.76e-14	-0.59221	0.28	0.509	1.32e-09	CM	downregulated
Gm40604	5.88e-14	-0.61938	0.08	0.301	1.35e-09	CM	downregulated
Nt5e	8.01e-14	0.697712	0.637	0.495	1.83e-09	CM	upregulated
Cntn5	1.21e-13	-0.92522	0.049	0.295	2.77e-09	CM	downregulated
Hectd2os	1.43e-12	-0.67783	0.428	0.621	3.27e-08	CM	downregulated
Kcnq5	1.99e-12	0.626084	0.312	0.133	4.57e-08	CM	upregulated
Trp63	4.22e-12	0.647688	0.188	0.1	9.68e-08	CM	upregulated
Rhbdl3	5.15e-12	-0.60787	0.04	0.327	1.18e-07	CM	downregulated
Fhit	9.34e-12	0.732982	0.76	0.589	2.14e-07	CM	upregulated
Cryab	3.49e-11	-0.71939	0.08	0.358	7.99e-07	CM	downregulated
Gsn	8.86e-11	-1.11006	0.049	0.284	2.03e-06	CM	downregulated
Cpeb3	1.45e-10	-0.80066	0.931	0.973	3.32e-06	CM	downregulated
Iigp1	1.56e-10	-0.71554	0.047	0.297	3.57e-06	CM	downregulated
Hrc	4.32e-10	-0.64405	0.008	0.217	9.9e-06	CM	downregulated
Resf1	4.43e-10	1.14134	0.669	0.386	1.01e-05	CM	upregulated
Daam1	4.52e-09	-0.64829	0.706	0.866	0.000103	CM	downregulated
Cped1	4.82e-09	-0.71869	0.538	0.806	0.00011	CM	downregulated
Gm12381	1.19e-08	-0.99864	0.202	0.34	0.000273	CM	downregulated
Hmcn1	1.5e-08	0.609273	0.92	0.886	0.000344	CM	upregulated
Son	3.67e-08	0.602614	0.955	0.922	0.000841	CM	upregulated
Magi1	4.26e-08	0.725975	0.892	0.801	0.000976	CM	upregulated
Ankrd1	1.64e-57	1.78899	0.519	0.125	3.75e-53	EC	upregulated
Vim	1.4e-47	0.665943	0.542	0.424	3.21e-43	EC	upregulated
Dcn	1.52e-40	1.00007	0.745	0.526	3.47e-36	EC	upregulated
Ccn2	1.43e-39	0.738515	0.255	0.128	3.28e-35	EC	upregulated
Col1a1	9.04e-39	1.10057	0.356	0.143	2.07e-34	EC	upregulated
Serping1	5.38e-38	0.766265	0.253	0.124	1.23e-33	EC	upregulated
Postn	1.05e-36	0.625818	0.225	0.099	2.41e-32	EC	upregulated
Eef1a1	1.09e-36	1.23187	0.613	0.372	2.5e-32	EC	upregulated
Col3a1	3.29e-35	1.22472	0.626	0.36	7.54e-31	EC	upregulated
Cd36	4.85e-35	-0.91178	0.644	0.808	1.11e-30	EC	downregulated
Acta1	2.33e-34	1.71626	0.349	0.012	5.33e-30	EC	upregulated
Mgp	5.55e-33	1.42056	0.723	0.445	1.27e-28	EC	upregulated
Tenm4	9.31e-33	0.866422	0.108	0.001	2.13e-28	EC	upregulated
Col1a2	6.92e-30	0.83786	0.405	0.257	1.59e-25	EC	upregulated
Ccdc80	7.46e-30	0.60221	0.477	0.382	1.71e-25	EC	upregulated
Ogn	1.84e-29	0.598067	0.268	0.173	4.22e-25	EC	upregulated
Gas1	2.19e-28	0.591009	0.192	0.092	5.02e-24	EC	upregulated
Igfbp5	5.66e-28	1.09256	0.508	0.263	1.3e-23	EC	upregulated
Ghitm	8.12e-28	1.26373	0.385	0.126	1.86e-23	EC	upregulated
Ppia	2.02e-27	0.731192	0.301	0.185	4.63e-23	EC	upregulated
Mmp2	2.14e-27	0.706406	0.218	0.104	4.91e-23	EC	upregulated
Etl4	7.08e-27	-0.96515	0.556	0.793	1.62e-22	EC	downregulated
Wdr17	6.7e-26	1.00836	0.431	0.322	1.54e-21	EC	upregulated
Col6a2	7.36e-26	0.605743	0.215	0.117	1.69e-21	EC	upregulated
Rps27	3.2e-25	0.783228	0.316	0.193	7.34e-21	EC	upregulated
Apoe	7.06e-25	1.62556	0.647	0.319	1.62e-20	EC	upregulated
Gm20631	2.27e-24	0.897126	0.345	0.233	5.2e-20	EC	upregulated
Gdf15	2.42e-24	0.682408	0.113	0	5.53e-20	EC	upregulated
Rpl6	2.52e-24	0.727851	0.375	0.246	5.77e-20	EC	upregulated
Hspa8	3.82e-24	1.01584	0.443	0.242	8.75e-20	EC	upregulated
Lyz2	6.39e-24	0.70071	0.283	0.172	1.46e-19	EC	upregulated
Hspd1	7.69e-24	0.933471	0.322	0.149	1.76e-19	EC	upregulated
Bgn	3.8e-23	1.01261	0.469	0.266	8.71e-19	EC	upregulated
Hsp90ab1	1.05e-22	0.667509	0.513	0.392	2.4e-18	EC	upregulated
Magi1	2.58e-22	-0.64066	0.731	0.906	5.92e-18	EC	downregulated
Lrp1	6.59e-22	0.687105	0.36	0.241	1.51e-17	EC	upregulated
Ctsl	1.01e-21	1.03772	0.356	0.157	2.32e-17	EC	upregulated
Rps4x	1.41e-21	0.626213	0.244	0.141	3.23e-17	EC	upregulated
Tnxb	1.71e-21	0.589031	0.302	0.192	3.91e-17	EC	upregulated
Ubb	2.05e-21	0.585396	0.231	0.13	4.7e-17	EC	upregulated
Rps18	4.38e-21	0.675287	0.253	0.152	1e-16	EC	upregulated
Rpl3	6.55e-21	0.816837	0.254	0.106	1.5e-16	EC	upregulated
Hsp90aa1	8.6e-21	0.588562	0.218	0.121	1.97e-16	EC	upregulated
Gm47283	9.8e-21	0.764022	0.377	0.263	2.25e-16	EC	upregulated
Rps21	2.78e-20	0.893393	0.477	0.312	6.37e-16	EC	upregulated
Rpl4	9.5e-20	0.632664	0.255	0.156	2.18e-15	EC	upregulated
Eif1	2.31e-19	0.956911	0.402	0.22	5.3e-15	EC	upregulated
Rpl12	3.53e-19	0.735424	0.247	0.121	8.09e-15	EC	upregulated
Chchd10	3.7e-19	1.83091	0.465	0.104	8.47e-15	EC	upregulated
Ccnd2	7.41e-19	0.663399	0.363	0.272	1.7e-14	EC	upregulated
Slc25a5	8.17e-19	0.681671	0.173	0.055	1.87e-14	EC	upregulated
Rpl23a	1.55e-18	0.897337	0.301	0.142	3.56e-14	EC	upregulated
Hspa9	1.58e-18	1.1099	0.394	0.192	3.62e-14	EC	upregulated
Fbln2	1.63e-18	0.798571	0.403	0.252	3.74e-14	EC	upregulated
Ptprm	2.4e-18	-0.62961	0.854	0.957	5.5e-14	EC	downregulated
Rarres2	2.98e-18	0.64776	0.149	0.046	6.82e-14	EC	upregulated
Pcolce	3.51e-18	0.655175	0.182	0.078	8.05e-14	EC	upregulated
Smoc2	3.98e-18	0.600716	0.259	0.154	9.12e-14	EC	upregulated
Lum	4.54e-18	0.98904	0.391	0.219	1.04e-13	EC	upregulated
Timp2	5.68e-18	0.645376	0.331	0.236	1.3e-13	EC	upregulated
Eif2s2	6.63e-18	0.657043	0.315	0.22	1.52e-13	EC	upregulated
Rpl5	8.81e-18	0.627305	0.298	0.192	2.02e-13	EC	upregulated
Tsc22d3	9.23e-18	0.877606	0.338	0.167	2.11e-13	EC	upregulated
Tpt1	1.03e-17	0.843672	0.558	0.393	2.36e-13	EC	upregulated
Myl3	1.29e-17	0.923414	0.596	0.423	2.95e-13	EC	upregulated
Igfbp4	1.99e-17	0.806262	0.32	0.175	4.56e-13	EC	upregulated
AY036118	2.16e-17	1.95405	0.878	0.762	4.96e-13	EC	upregulated
Rps11	3.26e-17	0.708728	0.266	0.143	7.46e-13	EC	upregulated
Rpl23	5e-17	1.06374	0.446	0.243	1.15e-12	EC	upregulated
Dach1	5.05e-17	-0.84539	0.406	0.589	1.16e-12	EC	downregulated
Ifi27l2a	5.27e-17	1.17022	0.237	0.04	1.21e-12	EC	upregulated
Mthfd2	2.19e-16	0.715305	0.142	0.016	5.03e-12	EC	upregulated
Sema6a	2.93e-16	-0.70849	0.57	0.792	6.7e-12	EC	downregulated
C3	3.07e-16	0.752425	0.271	0.147	7.04e-12	EC	upregulated
Rps25	4.09e-16	0.61249	0.257	0.156	9.38e-12	EC	upregulated
Pln	5.89e-16	0.628867	0.548	0.497	1.35e-11	EC	upregulated
Gng5	6.58e-16	0.612898	0.173	0.075	1.51e-11	EC	upregulated
B2m	7.14e-16	0.623878	0.536	0.465	1.64e-11	EC	upregulated
Syn3	8.54e-16	0.667868	0.258	0.171	1.96e-11	EC	upregulated
C1qc	9e-16	0.791081	0.205	0.074	2.06e-11	EC	upregulated
Cyyr1	1.82e-15	-0.72245	0.621	0.824	4.18e-11	EC	downregulated
Itm2b	4.47e-15	0.654982	0.605	0.546	1.02e-10	EC	upregulated
Col6a3	8.74e-15	0.592926	0.237	0.143	2e-10	EC	upregulated
Rpl15	9.96e-15	0.713126	0.257	0.139	2.28e-10	EC	upregulated
Rpl39	1.11e-14	1.01713	0.337	0.148	2.53e-10	EC	upregulated
Gm49708	1.21e-14	0.781641	0.239	0.109	2.78e-10	EC	upregulated
Atf5	1.89e-14	0.617703	0.154	0.049	4.33e-10	EC	upregulated
Gapdh	2.14e-14	0.699879	0.235	0.116	4.91e-10	EC	upregulated
Arntl	2.42e-14	-0.75025	0.074	0.296	5.55e-10	EC	downregulated
Cd63	4.92e-14	0.738316	0.214	0.08	1.13e-09	EC	upregulated
Arhgap18	9.46e-14	-0.76474	0.366	0.594	2.17e-09	EC	downregulated
Tmem108	1.85e-13	-0.7261	0.455	0.445	4.25e-09	EC	downregulated
Rps24	3.09e-13	1.01795	0.462	0.269	7.08e-09	EC	upregulated
Rps29	4.97e-13	1.33742	0.593	0.325	1.14e-08	EC	upregulated
Col6a1	1.5e-12	0.619766	0.243	0.152	3.43e-08	EC	upregulated
Nav3	1.98e-12	-0.61959	0.373	0.542	4.53e-08	EC	downregulated
Rpl27a	2.39e-12	0.8451	0.371	0.226	5.48e-08	EC	upregulated
Fbln1	2.59e-12	0.623255	0.189	0.095	5.92e-08	EC	upregulated
Myl2	2.92e-12	0.785641	0.593	0.392	6.68e-08	EC	upregulated
Egr1	3.1e-12	-0.64411	0.109	0.265	7.1e-08	EC	downregulated
Rps17	3.35e-12	1.14753	0.339	0.114	7.67e-08	EC	upregulated
Cd81	3.96e-12	0.643297	0.354	0.258	9.08e-08	EC	upregulated
Nrp1	5.08e-12	-0.74022	0.717	0.885	1.16e-07	EC	downregulated
Lysmd4	5.65e-12	0.742142	0.398	0.298	1.29e-07	EC	upregulated
Zfp608	7.93e-12	-0.66478	0.374	0.646	1.82e-07	EC	downregulated
Nuak1	1.06e-11	-0.60008	0.192	0.351	2.42e-07	EC	downregulated
Herpud1	1.31e-11	0.680901	0.217	0.114	3e-07	EC	upregulated
Rnf144a	1.83e-11	-0.68654	0.202	0.435	4.19e-07	EC	downregulated
Rps15a	2.01e-11	0.691691	0.273	0.164	4.6e-07	EC	upregulated
Rps7	5.94e-11	0.686465	0.28	0.169	1.36e-06	EC	upregulated
Ltbp4	6.37e-11	0.765523	0.652	0.547	1.46e-06	EC	upregulated
Prune2	7.27e-11	0.620247	0.163	0.09	1.66e-06	EC	upregulated
Rps27a	1.08e-10	0.920474	0.369	0.205	2.48e-06	EC	upregulated
Rps3a1	1.33e-10	0.776596	0.345	0.21	3.05e-06	EC	upregulated
Ifitm3	1.86e-10	0.720217	0.296	0.182	4.26e-06	EC	upregulated
Rps16	3.09e-10	0.614418	0.27	0.173	7.09e-06	EC	upregulated
Rps3	4.09e-10	0.649059	0.257	0.147	9.38e-06	EC	upregulated
Rpl10a	4.83e-10	0.652348	0.208	0.095	1.11e-05	EC	upregulated
Rps8	5.16e-10	0.769782	0.439	0.297	1.18e-05	EC	upregulated
Rasgrf2	6.39e-10	-0.63861	0.274	0.514	1.46e-05	EC	downregulated
Rpl19	8.27e-10	0.717337	0.333	0.206	1.9e-05	EC	upregulated
C1qa	1.13e-09	0.979493	0.235	0.062	2.58e-05	EC	upregulated
Eef2	2.13e-09	0.58373	0.38	0.276	4.88e-05	EC	upregulated
Aco2	3.49e-09	0.696505	0.346	0.244	8e-05	EC	upregulated
2610307P16Rik	4.71e-09	-0.59546	0.454	0.682	0.000108	EC	downregulated
Lonp1	4.93e-09	0.743717	0.153	0.036	0.000113	EC	upregulated
Cox4i1	5.09e-09	0.97705	0.482	0.289	0.000117	EC	upregulated
Rpl13a	7.72e-09	0.643609	0.288	0.189	0.000177	EC	upregulated
5330438D12Rik	7.81e-09	0.685172	0.319	0.233	0.000179	EC	upregulated
Palld	9.21e-09	-0.82683	0.109	0.288	0.000211	EC	downregulated
Rpl27	9.36e-09	0.788132	0.251	0.12	0.000214	EC	upregulated
Gja1	1.23e-08	0.689822	0.331	0.22	0.000283	EC	upregulated
Nme2	1.29e-08	0.893313	0.267	0.106	0.000297	EC	upregulated
Ablim1	1.38e-08	-0.65985	0.761	0.922	0.000316	EC	downregulated
Chchd2	1.65e-08	0.767133	0.32	0.214	0.000378	EC	upregulated
Rps23	1.73e-08	0.871408	0.34	0.188	0.000396	EC	upregulated
Zbtb16	1.74e-08	1.28496	0.694	0.324	0.000399	EC	upregulated
Got1	2.11e-08	0.899374	0.264	0.121	0.000482	EC	upregulated
Rpl14	2.12e-08	0.690694	0.245	0.134	0.000485	EC	upregulated
Eprs	2.12e-08	0.633823	0.281	0.201	0.000486	EC	upregulated
Ctsb	2.63e-08	0.670199	0.318	0.215	0.000601	EC	upregulated
Chrm2	3.3e-08	-0.6141	0.05	0.176	0.000756	EC	downregulated
AY036118	0	2.16566	0.907	0.79	0	FB	upregulated
Acta1	0	1.61348	0.345	0.027	0	FB	upregulated
Actb	0	0.638477	0.56	0.533	0	FB	upregulated
Actc1	0	0.982097	0.705	0.522	0	FB	upregulated
Actg1	0	0.802426	0.35	0.256	0	FB	upregulated
Adamts12	0	-0.81428	0.349	0.642	0	FB	downregulated
Airn	0	-0.60818	0.752	0.945	0	FB	downregulated
Aldoa	0	1.22144	0.449	0.228	0	FB	upregulated
Ankrd1	0	1.91746	0.56	0.16	0	FB	upregulated
Aplp2	0	0.590735	0.423	0.397	0	FB	upregulated
Apoe	0	1.6096	0.643	0.33	0	FB	upregulated
Arhgap24	0	-0.69442	0.615	0.836	0	FB	downregulated
Arhgap6	0	-0.60046	0.529	0.771	0	FB	downregulated
Arntl	0	-1.07398	0.111	0.447	0	FB	downregulated
Atp5a1	0	0.758959	0.497	0.376	0	FB	upregulated
Atp5b	0	1.08367	0.59	0.384	0	FB	upregulated
Atp5g1	0	1.11571	0.406	0.217	0	FB	upregulated
Atp5g3	0	0.673081	0.469	0.367	0	FB	upregulated
Atp5l	0	0.714148	0.384	0.303	0	FB	upregulated
Atrnl1	0	-0.67505	0.642	0.903	0	FB	downregulated
B2m	0	1.2713	0.576	0.395	0	FB	upregulated
Bgn	0	0.865634	0.679	0.539	0	FB	upregulated
Bicc1	0	-0.66393	0.76	0.947	0	FB	downregulated
C1qa	0	0.953817	0.234	0.087	0	FB	upregulated
Calm1	0	0.597625	0.305	0.254	0	FB	upregulated
Cd63	0	0.736321	0.301	0.207	0	FB	upregulated
Cd74	0	0.625462	0.267	0.198	0	FB	upregulated
Cd81	0	0.997065	0.413	0.256	0	FB	upregulated
Celf2	0	-0.91935	0.88	0.99	0	FB	downregulated
Chchd10	0	1.82752	0.487	0.13	0	FB	upregulated
Chchd2	0	0.948585	0.37	0.214	0	FB	upregulated
Col1a1	0	0.749312	0.624	0.567	0	FB	upregulated
Cox4i1	0	1.038	0.52	0.314	0	FB	upregulated
Cox6a2	0	0.987545	0.512	0.325	0	FB	upregulated
Cox6b1	0	0.860271	0.327	0.194	0	FB	upregulated
Cox6c	0	0.660947	0.477	0.397	0	FB	upregulated
Cox7b	0	0.720586	0.398	0.299	0	FB	upregulated
Cox7c	0	0.774478	0.488	0.394	0	FB	upregulated
Crip1	0	0.872665	0.43	0.279	0	FB	upregulated
Cryab	0	1.01434	0.38	0.204	0	FB	upregulated
Cst3	0	1.23592	0.489	0.263	0	FB	upregulated
Ctsb	0	0.725558	0.341	0.256	0	FB	upregulated
Ctsd	0	0.975841	0.378	0.214	0	FB	upregulated
Ctsl	0	1.02533	0.428	0.273	0	FB	upregulated
Dlc1	0	-0.75871	0.741	0.934	0	FB	downregulated
Ebf2	0	-1.00383	0.623	0.927	0	FB	downregulated
Eda	0	-0.61423	0.566	0.79	0	FB	downregulated
Eef1a1	0	1.45456	0.676	0.427	0	FB	upregulated
Egfr	0	-0.58641	0.587	0.827	0	FB	downregulated
Eif1	0	1.01759	0.421	0.25	0	FB	upregulated
Fabp3	0	1.54506	0.564	0.271	0	FB	upregulated
Fau	0	0.85271	0.269	0.157	0	FB	upregulated
Fth1	0	1.22054	0.558	0.33	0	FB	upregulated
Ftl1	0	0.71459	0.257	0.165	0	FB	upregulated
Gab2	0	-0.76463	0.753	0.964	0	FB	downregulated
Gapdh	0	1.02851	0.29	0.132	0	FB	upregulated
Ghitm	0	1.41908	0.412	0.137	0	FB	upregulated
Ghr	0	-0.68672	0.69	0.914	0	FB	downregulated
Gja1	0	1.01598	0.355	0.183	0	FB	upregulated
Gm49708	0	1.22475	0.305	0.078	0	FB	upregulated
H2-D1	0	0.945521	0.398	0.266	0	FB	upregulated
H2-K1	0	0.922183	0.385	0.27	0	FB	upregulated
Hbb-bs	0	0.682858	0.21	0.23	0	FB	upregulated
Hsp90aa1	0	0.846803	0.288	0.168	0	FB	upregulated
Hsp90ab1	0	1.07223	0.565	0.408	0	FB	upregulated
Hspa8	0	1.31992	0.487	0.266	0	FB	upregulated
Hspa9	0	1.20645	0.434	0.225	0	FB	upregulated
Hspd1	0	0.882471	0.338	0.201	0	FB	upregulated
Ifi27l2a	0	1.08703	0.321	0.153	0	FB	upregulated
Ifitm3	0	0.97163	0.362	0.214	0	FB	upregulated
Igfbp5	0	1.51009	0.479	0.175	0	FB	upregulated
Il31ra	0	0.602531	0.35	0.324	0	FB	upregulated
Itm2b	0	0.826297	0.638	0.582	0	FB	upregulated
Kcnt2	0	-0.63244	0.746	0.948	0	FB	downregulated
Lncpint	0	-0.6914	0.6	0.882	0	FB	downregulated
Ltbp4	0	0.731646	0.704	0.64	0	FB	upregulated
Lum	0	0.815885	0.55	0.462	0	FB	upregulated
Lyz2	0	0.903769	0.344	0.222	0	FB	upregulated
Mdh1	0	0.78415	0.369	0.257	0	FB	upregulated
Mgp	0	1.30569	0.793	0.591	0	FB	upregulated
Mid1	0	-0.59514	0.463	0.732	0	FB	downregulated
Mir100hg	0	-0.59771	0.728	0.959	0	FB	downregulated
Myh6	0	1.06416	0.707	0.524	0	FB	upregulated
Myl12a	0	0.918309	0.358	0.229	0	FB	upregulated
Myl2	0	0.780648	0.645	0.451	0	FB	upregulated
Myl3	0	0.73817	0.641	0.476	0	FB	upregulated
Nav1	0	-0.77292	0.657	0.916	0	FB	downregulated
Ndufa4	0	0.612322	0.438	0.346	0	FB	upregulated
Ndufb9	0	0.74996	0.332	0.218	0	FB	upregulated
Nme2	0	0.973006	0.313	0.161	0	FB	upregulated
Npas2	0	-1.68007	0.185	0.592	0	FB	downregulated
Npr3	0	1.1512	0.275	0.083	0	FB	upregulated
Pcdh9	0	-0.65094	0.736	0.91	0	FB	downregulated
Plekha5	0	-0.63169	0.485	0.785	0	FB	downregulated
Pln	0	0.942735	0.577	0.424	0	FB	upregulated
Plxdc2	0	-0.87391	0.687	0.925	0	FB	downregulated
Ppia	0	0.94769	0.333	0.196	0	FB	upregulated
Ptma	0	0.766643	0.466	0.381	0	FB	upregulated
Rack1	0	0.857931	0.272	0.152	0	FB	upregulated
Rbms3	0	-0.78517	0.792	0.988	0	FB	downregulated
Rhoj	0	-0.66825	0.613	0.867	0	FB	downregulated
Rora	0	-0.71505	0.852	0.981	0	FB	downregulated
Rpl10	0	0.752258	0.219	0.123	0	FB	upregulated
Rpl11	0	0.989512	0.322	0.179	0	FB	upregulated
Rpl12	0	0.877635	0.285	0.157	0	FB	upregulated
Rpl13	0	1.11645	0.443	0.265	0	FB	upregulated
Rpl13a	0	1.01693	0.352	0.19	0	FB	upregulated
Rpl15	0	0.95274	0.292	0.154	0	FB	upregulated
Rpl17	0	0.735992	0.308	0.226	0	FB	upregulated
Rpl18	0	0.845278	0.275	0.161	0	FB	upregulated
Rpl18a	0	1.11852	0.367	0.184	0	FB	upregulated
Rpl19	0	0.988865	0.363	0.22	0	FB	upregulated
Rpl21	0	0.845929	0.265	0.153	0	FB	upregulated
Rpl23	0	1.25909	0.475	0.263	0	FB	upregulated
Rpl23a	0	1.00973	0.34	0.184	0	FB	upregulated
Rpl24	0	0.93255	0.366	0.239	0	FB	upregulated
Rpl26	0	1.08039	0.337	0.163	0	FB	upregulated
Rpl27	0	0.910258	0.276	0.129	0	FB	upregulated
Rpl27a	0	0.998177	0.409	0.262	0	FB	upregulated
Rpl28	0	0.886467	0.299	0.169	0	FB	upregulated
Rpl3	0	0.993219	0.281	0.13	0	FB	upregulated
Rpl30	0	1.02862	0.348	0.187	0	FB	upregulated
Rpl31	0	0.698458	0.244	0.158	0	FB	upregulated
Rpl32	0	1.05056	0.32	0.155	0	FB	upregulated
Rpl34	0	0.937952	0.332	0.197	0	FB	upregulated
Rpl35	0	0.757487	0.212	0.107	0	FB	upregulated
Rpl35a	0	1.05152	0.417	0.254	0	FB	upregulated
Rpl36	0	1.0011	0.328	0.175	0	FB	upregulated
Rpl37	0	1.37551	0.435	0.205	0	FB	upregulated
Rpl37a	0	1.17294	0.372	0.188	0	FB	upregulated
Rpl38	0	1.47412	0.4	0.154	0	FB	upregulated
Rpl39	0	1.17965	0.379	0.19	0	FB	upregulated
Rpl4	0	0.81673	0.302	0.185	0	FB	upregulated
Rpl41	0	1.25421	0.352	0.15	0	FB	upregulated
Rpl5	0	0.894946	0.334	0.204	0	FB	upregulated
Rpl6	0	0.888785	0.434	0.312	0	FB	upregulated
Rpl7	0	0.735045	0.289	0.199	0	FB	upregulated
Rpl7a	0	0.816405	0.268	0.15	0	FB	upregulated
Rpl8	0	0.910433	0.326	0.197	0	FB	upregulated
Rpl9	0	0.951118	0.279	0.137	0	FB	upregulated
Rplp0	0	1.07147	0.374	0.197	0	FB	upregulated
Rplp1	0	1.48152	0.564	0.284	0	FB	upregulated
Rplp2	0	0.887822	0.372	0.235	0	FB	upregulated
Rps10	0	1.00783	0.357	0.2	0	FB	upregulated
Rps11	0	0.948312	0.306	0.157	0	FB	upregulated
Rps12	0	0.998492	0.378	0.233	0	FB	upregulated
Rps13	0	0.972051	0.311	0.173	0	FB	upregulated
Rps14	0	0.955297	0.377	0.243	0	FB	upregulated
Rps15	0	0.93874	0.431	0.275	0	FB	upregulated
Rps15a	0	0.923675	0.325	0.194	0	FB	upregulated
Rps16	0	0.889363	0.333	0.2	0	FB	upregulated
Rps17	0	1.26527	0.388	0.158	0	FB	upregulated
Rps18	0	0.83634	0.292	0.177	0	FB	upregulated
Rps19	0	1.00118	0.334	0.181	0	FB	upregulated
Rps2	0	0.703081	0.266	0.176	0	FB	upregulated
Rps20	0	0.90784	0.336	0.21	0	FB	upregulated
Rps21	0	0.886083	0.49	0.334	0	FB	upregulated
Rps23	0	1.05727	0.396	0.226	0	FB	upregulated
Rps24	0	1.28967	0.496	0.284	0	FB	upregulated
Rps25	0	0.894233	0.316	0.194	0	FB	upregulated
Rps26	0	1.05923	0.31	0.154	0	FB	upregulated
Rps27	0	1.0896	0.361	0.191	0	FB	upregulated
Rps27a	0	1.11474	0.411	0.23	0	FB	upregulated
Rps28	0	1.23069	0.447	0.237	0	FB	upregulated
Rps29	0	1.49513	0.625	0.347	0	FB	upregulated
Rps3	0	0.795008	0.268	0.147	0	FB	upregulated
Rps3a1	0	1.02351	0.382	0.215	0	FB	upregulated
Rps4x	0	0.929003	0.307	0.162	0	FB	upregulated
Rps5	0	0.961002	0.281	0.139	0	FB	upregulated
Rps6	0	0.781206	0.252	0.151	0	FB	upregulated
Rps7	0	0.968818	0.31	0.164	0	FB	upregulated
Rps8	0	1.04392	0.503	0.329	0	FB	upregulated
Rps9	0	1.02984	0.333	0.166	0	FB	upregulated
Rpsa	0	1.02771	0.405	0.227	0	FB	upregulated
Selenop	0	0.664648	0.43	0.385	0	FB	upregulated
Serpinh1	0	0.615976	0.374	0.323	0	FB	upregulated
Slc25a3	0	0.808955	0.448	0.35	0	FB	upregulated
Slc25a5	0	0.91719	0.221	0.071	0	FB	upregulated
Sobp	0	-0.67231	0.4	0.699	0	FB	downregulated
Sox5	0	-0.75563	0.696	0.939	0	FB	downregulated
Sparc	0	0.664104	0.667	0.623	0	FB	upregulated
Ssh2	0	-0.78943	0.598	0.865	0	FB	downregulated
Tenm3	0	-0.62106	0.624	0.883	0	FB	downregulated
Tmsb4x	0	1.15122	0.544	0.365	0	FB	upregulated
Tnnc1	0	1.09028	0.42	0.238	0	FB	upregulated
Tnnt2	0	0.587489	0.42	0.359	0	FB	upregulated
Tpt1	0	1.22676	0.608	0.39	0	FB	upregulated
Ttn	0	1.16414	0.687	0.466	0	FB	upregulated
Ubb	0	0.945394	0.291	0.15	0	FB	upregulated
Uqcrb	0	0.7342	0.282	0.184	0	FB	upregulated
Uqcrq	0	0.654907	0.35	0.252	0	FB	upregulated
Vim	0	0.844809	0.571	0.506	0	FB	upregulated
Zeb1	0	-0.63721	0.792	0.962	0	FB	downregulated
Zeb2	0	-0.8395	0.676	0.912	0	FB	downregulated
Zfpm2	0	-0.59855	0.74	0.943	0	FB	downregulated
Atp5f1	2.85293266534569e-319	0.608012	0.369	0.31	6.53635402957352e-315	FB	upregulated
Rpl14	1.42431665304779e-317	0.79829	0.274	0.155	3.2632518837978e-313	FB	upregulated
Fabp4	1.32979907882418e-316	1.10853	0.511	0.305	3.04670266949408e-312	FB	upregulated
Hspb7	1.51115066656697e-315	0.833225	0.278	0.15	3.46219729217159e-311	FB	upregulated
C1qb	1.97767469616427e-311	0.737137	0.16	0.054	4.53e-307	FB	upregulated
Ifitm2	3.0716111772873e-310	0.799567	0.218	0.113	7.04e-306	FB	upregulated
Xirp2	0	0.911322	0.272	0.137	5.08e-305	FB	upregulated
Serinc3	0	0.707859	0.434	0.381	3.42e-304	FB	upregulated
Cox5a	1.08e-307	0.912076	0.338	0.19	2.48e-303	FB	upregulated
Mybpc3	1.82e-307	0.920605	0.302	0.162	4.18e-303	FB	upregulated
Bsg	5.64e-307	0.701456	0.315	0.216	1.29e-302	FB	upregulated
Sash1	7.68e-306	-0.66369	0.481	0.793	1.76e-301	FB	downregulated
Atp5j2	1.27e-303	0.816124	0.321	0.193	2.91e-299	FB	upregulated
Psap	5.28e-303	0.704934	0.431	0.357	1.21e-298	FB	upregulated
Tuba1b	1.42e-300	0.803541	0.225	0.117	3.25e-296	FB	upregulated
Atp5e	2.69e-300	0.678671	0.259	0.173	6.16e-296	FB	upregulated
Cox7a2	9.8e-300	0.864517	0.32	0.2	2.25e-295	FB	upregulated
Eef2	2.5e-299	0.689776	0.394	0.297	5.73e-295	FB	upregulated
Rpl22	9e-298	0.853314	0.255	0.138	2.06e-293	FB	upregulated
Cpe	5.37e-297	1.09205	0.308	0.124	1.23e-292	FB	upregulated
Rarres2	7.88e-296	0.672466	0.243	0.177	1.8e-291	FB	upregulated
H3f3b	1.45e-295	0.629815	0.337	0.289	3.33e-291	FB	upregulated
Uba52	2.78e-295	0.644567	0.16	0.068	6.37e-291	FB	upregulated
Ctla2a	2.04e-292	0.794557	0.175	0.039	4.67e-288	FB	upregulated
Eif3c	2.36e-292	0.610277	0.271	0.208	5.4e-288	FB	upregulated
Crip2	2.2e-291	0.793672	0.378	0.278	5.05e-287	FB	upregulated
C1qc	2.39e-291	0.878821	0.204	0.07	5.48e-287	FB	upregulated
Rpl10a	3.81e-291	0.753028	0.245	0.143	8.72e-287	FB	upregulated
Vwf	1.39e-290	0.780637	0.167	0.048	3.18e-286	FB	upregulated
Fabp5	1.96e-289	0.917312	0.204	0.053	4.5e-285	FB	upregulated
Got1	2.32e-289	0.958436	0.3	0.142	5.31e-285	FB	upregulated
Fbn1	3.68e-288	-0.94455	0.737	0.913	8.44e-284	FB	downregulated
Abca8a	2.4e-287	-0.81648	0.821	0.947	5.5e-283	FB	downregulated
Eif4g2	3.12e-287	0.736286	0.438	0.366	7.15e-283	FB	upregulated
Laptm4a	5.31e-287	0.686731	0.427	0.372	1.22e-282	FB	upregulated
Ngf	1.16e-286	-0.85446	0.351	0.665	2.65e-282	FB	downregulated
Myl6	1.64e-286	0.75586	0.364	0.276	3.76e-282	FB	upregulated
Lmod2	1.68e-285	0.603747	0.138	0.061	3.85e-281	FB	upregulated
Serf2	4.95e-284	0.58247	0.274	0.229	1.13e-279	FB	upregulated
Atp5md	5.23e-283	0.900783	0.253	0.122	1.2e-278	FB	upregulated
Eif4g3	5.99e-282	-0.5876	0.503	0.79	1.37e-277	FB	downregulated
Postn	1.09e-278	0.853034	0.287	0.129	2.49e-274	FB	upregulated
Rpl36a	5.13e-278	0.806868	0.199	0.081	1.18e-273	FB	upregulated
Des	1.39e-277	0.836144	0.287	0.157	3.17e-273	FB	upregulated
Naca	3.62e-276	0.710109	0.299	0.22	8.28e-272	FB	upregulated
Atp5k	1.58e-275	0.64022	0.288	0.196	3.61e-271	FB	upregulated
Uqcrh	6.43e-275	0.802193	0.325	0.209	1.47e-270	FB	upregulated
Ccnd2	1.27e-273	0.815861	0.289	0.172	2.9e-269	FB	upregulated
Csrp3	1.98e-266	0.634441	0.309	0.223	4.55e-262	FB	upregulated
Atp1a1	8.2e-266	0.668596	0.323	0.23	1.88e-261	FB	upregulated
Myadm	2.56e-263	0.589876	0.325	0.281	5.86e-259	FB	upregulated
Sem1	8.15e-263	0.762085	0.304	0.213	1.87e-258	FB	upregulated
Cavin2	2.53e-262	0.708439	0.333	0.244	5.81e-258	FB	upregulated
Ndufa5	4.27e-262	0.766534	0.286	0.182	9.79e-258	FB	upregulated
Hivep2	2.65e-261	-0.61038	0.604	0.857	6.08e-257	FB	downregulated
Mdh2	5.41e-260	0.630767	0.338	0.278	1.24e-255	FB	upregulated
C1qtnf7	3.68e-258	-0.7291	0.478	0.763	8.42e-254	FB	downregulated
Clmp	1.38e-256	-0.76626	0.28	0.563	3.16e-252	FB	downregulated
Aco2	1.68e-253	0.810462	0.377	0.265	3.86e-249	FB	upregulated
Cyc1	2.03e-253	0.605498	0.253	0.177	4.65e-249	FB	upregulated
Ckm	5.06e-248	0.671748	0.317	0.224	1.16e-243	FB	upregulated
Uqcr11	1.31e-247	0.658675	0.269	0.175	2.99e-243	FB	upregulated
Eif2s2	6.69e-244	0.709889	0.339	0.263	1.53e-239	FB	upregulated
Cox8a	1.07e-243	0.812469	0.228	0.112	2.46e-239	FB	upregulated
Upk3b	4.69e-243	0.721214	0.13	0.011	1.07e-238	FB	upregulated
Nppa	2.33e-241	0.750957	0.224	0.117	5.34e-237	FB	upregulated
Prune2	4.54e-241	1.06299	0.201	0.029	1.04e-236	FB	upregulated
Ly6e	4.89e-241	0.841826	0.363	0.246	1.12e-236	FB	upregulated
Eef1b2	1.37e-240	0.666848	0.21	0.116	3.13e-236	FB	upregulated
Nppb	2.91e-236	0.731105	0.187	0.066	6.66e-232	FB	upregulated
Tm4sf1	7.77e-236	0.656434	0.227	0.147	1.78e-231	FB	upregulated
Prdx1	2.67e-235	0.610557	0.269	0.213	6.12e-231	FB	upregulated
Uqcr10	3.19e-235	0.767481	0.232	0.125	7.3e-231	FB	upregulated
Runx1t1	4.66e-234	-0.5865	0.333	0.598	1.07e-229	FB	downregulated
Atp5d	1.27e-233	0.607546	0.197	0.127	2.9e-229	FB	upregulated
Wwox	3.26e-232	-0.59346	0.437	0.642	7.47e-228	FB	downregulated
Ccn2	9.18e-231	0.647753	0.342	0.232	2.1e-226	FB	upregulated
Ddr2	1.06e-230	-0.68901	0.433	0.768	2.44e-226	FB	downregulated
Adam19	1.36e-230	-0.79087	0.321	0.621	3.11e-226	FB	downregulated
Atp1b1	5.72e-230	0.597605	0.201	0.118	1.31e-225	FB	upregulated
Hint1	7.34e-228	0.725088	0.218	0.107	1.68e-223	FB	upregulated
Gpx4	1.53e-227	0.858542	0.253	0.121	3.51e-223	FB	upregulated
Igf2	2.42e-227	0.648212	0.136	0.028	5.54e-223	FB	upregulated
Aqp1	9.24e-226	0.919674	0.27	0.113	2.12e-221	FB	upregulated
Sorbs2	5.56e-225	1.4415	0.319	0.06	1.27e-220	FB	upregulated
Abca6	2.31e-224	-1.14266	0.347	0.72	5.3e-220	FB	downregulated
Hspe1	1.18e-223	0.670524	0.163	0.07	2.71e-219	FB	upregulated
Sod1	2.6e-223	0.67616	0.27	0.177	5.95e-219	FB	upregulated
Lsamp	1.57e-221	-0.67314	0.454	0.63	3.6e-217	FB	downregulated
Gdf15	8.12e-221	0.823873	0.144	0	1.86e-216	FB	upregulated
Ndufa11	3.75e-219	0.609858	0.171	0.093	8.58e-215	FB	upregulated
Pcbp1	9.75e-218	0.617913	0.182	0.096	2.23e-213	FB	upregulated
Smad3	4.54e-215	-0.72123	0.249	0.545	1.04e-210	FB	downregulated
Gng5	7.97e-214	0.768053	0.191	0.075	1.83e-209	FB	upregulated
Tubb4b	8.79e-213	0.59494	0.148	0.069	2.01e-208	FB	upregulated
Nexn	4.81e-210	0.736649	0.269	0.175	1.1e-205	FB	upregulated
Herpud1	6.14e-207	0.693928	0.251	0.173	1.41e-202	FB	upregulated
Rgs6	2.63e-206	-0.89895	0.311	0.507	6.02e-202	FB	downregulated
Hspb1	1.04e-205	0.777452	0.171	0.044	2.38e-201	FB	upregulated
Eef1a2	5.76e-201	0.58834	0.219	0.149	1.32e-196	FB	upregulated
Agap1	9.26e-201	-0.71233	0.43	0.72	2.12e-196	FB	downregulated
Rpl36al	7.17e-200	0.638097	0.167	0.085	1.64e-195	FB	upregulated
Mrc1	4.45e-197	0.596917	0.232	0.155	1.02e-192	FB	upregulated
Cox17	2.83e-196	0.807274	0.237	0.121	6.48e-192	FB	upregulated
Ldhb	9.37e-196	0.616447	0.252	0.173	2.15e-191	FB	upregulated
Nceh1	1.45e-194	0.66883	0.222	0.129	3.32e-190	FB	upregulated
Tcap	1.71e-191	0.820568	0.231	0.113	3.92e-187	FB	upregulated
Sgcd	2.34e-191	-0.69895	0.579	0.742	5.37e-187	FB	downregulated
Adamts5	2.42e-191	-0.77734	0.579	0.823	5.54e-187	FB	downregulated
Fndc3a	7.44e-190	-0.70329	0.375	0.7	1.71e-185	FB	downregulated
Eif5a	1.74e-188	0.615245	0.181	0.098	3.98e-184	FB	upregulated
Tenm4	1.82e-188	0.905706	0.141	0.007	4.17e-184	FB	upregulated
Dapk1	3.09e-188	-0.81454	0.298	0.552	7.07e-184	FB	downregulated
Mfap4	2.52e-184	0.725357	0.252	0.121	5.77e-180	FB	upregulated
Cox6a1	8.27e-183	0.686958	0.192	0.093	1.89e-178	FB	upregulated
Oaz1	7.92e-182	0.641722	0.228	0.139	1.82e-177	FB	upregulated
Tpi1	7.95e-181	0.597949	0.173	0.086	1.82e-176	FB	upregulated
Ivns1abp	5.64e-179	0.93083	0.277	0.149	1.29e-174	FB	upregulated
Actn2	8.19e-178	0.659309	0.214	0.126	1.88e-173	FB	upregulated
Heg1	4.2e-177	-0.69313	0.694	0.9	9.62e-173	FB	downregulated
Cytl1	1.06e-176	0.580809	0.11	0.028	2.44e-172	FB	upregulated
Adprhl1	6.38e-176	0.702478	0.157	0.05	1.46e-171	FB	upregulated
Fxyd1	1.22e-174	0.618925	0.21	0.135	2.79e-170	FB	upregulated
Grn	3.61e-171	0.669049	0.244	0.165	8.28e-167	FB	upregulated
Rps27l	4.82e-168	0.634096	0.157	0.064	1.1e-163	FB	upregulated
Vgll3	8.14e-166	-0.65342	0.206	0.437	1.87e-161	FB	downregulated
Stab1	2.14e-163	0.716416	0.144	0.033	4.9e-159	FB	upregulated
Abca8b	3.98e-162	-0.65667	0.516	0.759	9.12e-158	FB	downregulated
Enah	1.78e-160	0.647432	0.236	0.163	4.08e-156	FB	upregulated
Slit3	5.79e-159	-0.59029	0.438	0.645	1.33e-154	FB	downregulated
Fhl2	6.81e-159	1.23544	0.27	0.062	1.56e-154	FB	upregulated
Akap6	2.65e-157	0.998376	0.244	0.081	6.07e-153	FB	upregulated
Atf4	4.07e-157	0.730259	0.236	0.134	9.34e-153	FB	upregulated
Gpm6a	2.64e-156	0.679405	0.142	0.033	6.05e-152	FB	upregulated
Ryr2	5.63e-155	1.13195	0.35	0.146	1.29e-150	FB	upregulated
Magi2	4.47e-150	-0.59148	0.559	0.72	1.02e-145	FB	downregulated
Mt1	2.32e-148	0.666652	0.173	0.073	5.32e-144	FB	upregulated
Glis3	2.26e-147	-0.58352	0.229	0.452	5.19e-143	FB	downregulated
Nova1	7.46e-146	-0.63367	0.147	0.373	1.71e-141	FB	downregulated
Rbm24	1.8e-143	0.642244	0.1	0.003	4.12e-139	FB	upregulated
Scara5	1.45e-139	-0.77813	0.315	0.609	3.33e-135	FB	downregulated
Pde4dip	2.19e-139	1.07604	0.282	0.104	5.02e-135	FB	upregulated
Man1a	5.96e-138	-0.78881	0.432	0.748	1.36e-133	FB	downregulated
Bnc2	2.76e-135	-0.58271	0.276	0.499	6.32e-131	FB	downregulated
Col6a6	4.75e-134	-0.59467	0.235	0.463	1.09e-129	FB	downregulated
Maf	6.89e-133	0.619046	0.171	0.079	1.58e-128	FB	upregulated
Lrrc2	1.49e-132	0.704631	0.132	0.025	3.41e-128	FB	upregulated
Dmd	1.99e-130	1.42283	0.434	0.169	4.56e-126	FB	upregulated
Cdh2	1.57e-129	0.611366	0.229	0.154	3.61e-125	FB	upregulated
Obscn	7.59e-128	0.63491	0.11	0.02	1.74e-123	FB	upregulated
Lonp1	1e-126	0.796007	0.171	0.042	2.3e-122	FB	upregulated
Dmpk	1.9e-125	0.718268	0.157	0.044	4.36e-121	FB	upregulated
Tsc22d3	2.85e-125	0.66365	0.331	0.235	6.53e-121	FB	upregulated
Tek	3.14e-124	-0.65019	0.357	0.64	7.2e-120	FB	downregulated
Sdk1	2.57e-122	-0.78465	0.244	0.457	5.89e-118	FB	downregulated
Rbm20	1.52e-119	0.679399	0.129	0.037	3.48e-115	FB	upregulated
Mthfd2	3.55e-119	0.679709	0.144	0.03	8.13e-115	FB	upregulated
Gyg	1.02e-116	0.596065	0.137	0.042	2.34e-112	FB	upregulated
Acta2	2.13e-115	0.625368	0.142	0.037	4.87e-111	FB	upregulated
Medag	6.29e-110	-0.67518	0.383	0.673	1.44e-105	FB	downregulated
Myom1	9.19e-110	0.733533	0.21	0.105	2.11e-105	FB	upregulated
Aox1	6.56e-109	-0.5835	0.144	0.391	1.5e-104	FB	downregulated
Ston2	3.98e-102	-0.65461	0.215	0.467	9.11e-98	FB	downregulated
Gfra1	1.63e-100	-0.72542	0.164	0.369	3.72e-96	FB	downregulated
Ldb3	2.81e-99	0.917677	0.195	0.045	6.44e-95	FB	upregulated
Cacna1c	2.04e-87	0.58239	0.326	0.221	4.66e-83	FB	upregulated
Gfpt2	9.96e-86	-0.83096	0.29	0.526	2.28e-81	FB	downregulated
Adamtsl3	1.2e-84	-0.96717	0.26	0.533	2.75e-80	FB	downregulated
Adgrd1	1.69e-80	-0.90659	0.194	0.448	3.88e-76	FB	downregulated
Rcan2	2.84e-69	0.645625	0.168	0.082	6.52e-65	FB	upregulated
Erbb4	1.33e-66	0.683254	0.196	0.056	3.04e-62	FB	upregulated
Hrc	5.47e-57	-0.671	0.081	0.266	1.25e-52	FB	downregulated
Flt1	6.77e-54	0.592571	0.277	0.185	1.55e-49	FB	upregulated
Lmo7	4.96e-39	0.623034	0.167	0.066	1.14e-34	FB	upregulated
Gm47283	4.03e-38	0.637227	0.355	0.302	9.23e-34	FB	upregulated
Adamtsl2	2.24e-19	0.787704	0.306	0.179	5.14e-15	FB	upregulated
Sod1	4.19e-09	0.702878	0.297	0.156	9.6e-05	LEC	upregulated
Ankrd1	8.92e-32	1.91256	0.464	0.092	2.04e-27	MAC	upregulated
Mfap4	4.84e-16	0.639441	0.139	0.023	1.11e-11	MAC	upregulated
Rps17	9.33e-16	1.19275	0.303	0.083	2.14e-11	MAC	upregulated
Chchd10	4.5e-14	1.8748	0.44	0.069	1.03e-09	MAC	upregulated
Ctsl	1.43e-13	1.10661	0.321	0.119	3.27e-09	MAC	upregulated
Serping1	1.8e-13	0.622228	0.263	0.196	4.13e-09	MAC	upregulated
Fbln2	1.69e-12	0.987611	0.376	0.209	3.87e-08	MAC	upregulated
Dcn	7.12e-12	1.23247	0.709	0.391	1.63e-07	MAC	upregulated
Vim	1.02e-11	0.843126	0.416	0.291	2.34e-07	MAC	upregulated
Ccdc80	1.24e-11	0.805132	0.423	0.336	2.84e-07	MAC	upregulated
Eef1b2	1.86e-11	0.676921	0.17	0.065	4.27e-07	MAC	upregulated
Lum	2.38e-11	1.09004	0.346	0.156	5.45e-07	MAC	upregulated
Ghitm	3.25e-11	1.2674	0.341	0.107	7.43e-07	MAC	upregulated
Gas1	6.91e-11	0.710956	0.208	0.101	1.58e-06	MAC	upregulated
Hsp90ab1	7.17e-11	1.23481	0.477	0.225	1.64e-06	MAC	upregulated
Gdf15	1.78e-10	0.593084	0.109	0	4.08e-06	MAC	upregulated
Ppia	1.88e-10	0.720422	0.271	0.204	4.32e-06	MAC	upregulated
Cpe	2.42e-10	0.695201	0.25	0.202	5.55e-06	MAC	upregulated
Eef1a1	2.43e-10	1.59429	0.54	0.235	5.57e-06	MAC	upregulated
Rps3	3.76e-10	0.701662	0.202	0.098	8.61e-06	MAC	upregulated
Dpt	5.63e-10	0.691393	0.241	0.139	1.29e-05	MAC	upregulated
Hspa8	7.96e-10	1.33283	0.409	0.146	1.82e-05	MAC	upregulated
Rps4x	1.06e-09	0.875921	0.22	0.081	2.42e-05	MAC	upregulated
Mmp2	1.09e-09	0.751106	0.214	0.101	2.49e-05	MAC	upregulated
Actb	1.19e-09	0.650058	0.492	0.413	2.72e-05	MAC	upregulated
Igfbp5	2.27e-09	1.35139	0.358	0.115	5.21e-05	MAC	upregulated
Fstl1	4.64e-09	0.77103	0.436	0.347	0.000106	MAC	upregulated
Mgp	6.39e-09	1.94623	0.628	0.236	0.000146	MAC	upregulated
Tenm4	1.03e-08	0.822406	0.102	0.009	0.000237	MAC	upregulated
Nme2	1.21e-08	0.981478	0.231	0.067	0.000277	MAC	upregulated
Gapdh	1.35e-08	0.838407	0.223	0.075	0.000309	MAC	upregulated
Rps11	1.66e-08	0.861447	0.236	0.099	0.000381	MAC	upregulated
Hsp90aa1	2.94e-08	0.684976	0.218	0.108	0.000673	MAC	upregulated
Bgn	4.24e-08	1.65139	0.409	0.091	0.000972	MES	upregulated
Ankrd1	1.07e-28	1.80654	0.546	0.139	2.44e-24	PC	upregulated
Psd3	4.63e-20	-0.74394	0.794	0.965	1.06e-15	PC	downregulated
Mast4	2.55e-16	-0.73774	0.973	0.996	5.84e-12	PC	downregulated
Tenm4	3.32e-14	0.780466	0.117	0.001	7.6e-10	PC	upregulated
Ccn2	1.81e-11	0.689523	0.271	0.151	4.14e-07	PC	upregulated
Mfap4	5.12e-11	0.634667	0.139	0.028	1.17e-06	PC	upregulated
Slc24a3	1.1e-10	-0.82706	0.52	0.805	2.52e-06	PC	downregulated
Eef1a1	2.16e-10	1.55299	0.626	0.301	4.94e-06	PC	upregulated
Acta1	2.69e-10	1.61352	0.338	0.023	6.17e-06	PC	upregulated
Hsp90ab1	7.3e-10	0.84856	0.529	0.359	1.67e-05	PC	upregulated
Itm2b	1.22e-09	0.748453	0.586	0.524	2.79e-05	PC	upregulated
Cfh	1.22e-09	0.725795	0.717	0.574	2.8e-05	PC	upregulated
Gars	3.95e-09	0.605581	0.186	0.09	9.06e-05	PC	upregulated
Rpl12	5.87e-09	0.770256	0.232	0.107	0.000134	PC	upregulated
Eif4g3	1.2e-08	-0.86691	0.507	0.821	0.000274	PC	downregulated
Stab1	1.2e-08	0.600321	0.184	0.085	0.000276	PC	upregulated
Hspa8	1.41e-08	1.12319	0.427	0.217	0.000323	PC	upregulated
Dlc1	1.72e-08	-0.68045	0.994	0.998	0.000394	PC	downregulated
Fbln2	1.89e-08	0.878829	0.39	0.218	0.000432	PC	upregulated
Npr3	2.69e-08	0.819558	0.266	0.128	0.000616	PC	upregulated
Hspa9	3.55e-08	1.04832	0.414	0.226	0.000813	PC	upregulated
Rpl6	3.56e-08	0.891893	0.404	0.223	0.000816	PC	upregulated

## Sheet: ST3
Cluster	Celltype	Group	ID	Description	GeneRatio	BgRatio	pvalue	p.adjust	qvalue	geneID	Count
ADIPO.downregulated	ADIPO	downregulated	GO:0010769	regulation of cell morphogenesis involved in differentiation	0.428571	333/16955	0.000248	0.038165	0.023739	Kif13b/Tnik/Mgll	3
ADIPO.upregulated	ADIPO	upregulated	GO:0006084	acetyl-CoA metabolic process	0.2	32/16955	2.74e-06	0.000899	0.000561	Acly/Dlat/Fasn	3
ADIPO.upregulated	ADIPO	upregulated	GO:0006633	fatty acid biosynthetic process	0.266667	134/16955	4.76e-06	0.000899	0.000561	Acly/Elovl6/Fasn/Insig1	4
ADIPO.upregulated	ADIPO	upregulated	GO:0006631	fatty acid metabolic process	0.333333	356/16955	1e-05	0.001263	0.000788	Acly/Fabp4/Elovl6/Fasn/Insig1	5
ADIPO.upregulated	ADIPO	upregulated	GO:0072330	monocarboxylic acid biosynthetic process	0.266667	182/16955	1.6e-05	0.001511	0.000942	Acly/Elovl6/Fasn/Insig1	4
ADIPO.upregulated	ADIPO	upregulated	GO:0006637	acyl-CoA metabolic process	0.2	78/16955	4.1e-05	0.00258	0.001609	Acly/Dlat/Fasn	3
ADIPO.upregulated	ADIPO	upregulated	GO:0035383	thioester metabolic process	0.2	78/16955	4.1e-05	0.00258	0.001609	Acly/Dlat/Fasn	3
ADIPO.upregulated	ADIPO	upregulated	GO:0033865	nucleoside bisphosphate metabolic process	0.2	92/16955	6.71e-05	0.002798	0.001745	Acly/Dlat/Fasn	3
ADIPO.upregulated	ADIPO	upregulated	GO:0033875	ribonucleoside bisphosphate metabolic process	0.2	92/16955	6.71e-05	0.002798	0.001745	Acly/Dlat/Fasn	3
ADIPO.upregulated	ADIPO	upregulated	GO:0034032	purine nucleoside bisphosphate metabolic process	0.2	92/16955	6.71e-05	0.002798	0.001745	Acly/Dlat/Fasn	3
ADIPO.upregulated	ADIPO	upregulated	GO:0046394	carboxylic acid biosynthetic process	0.266667	275/16955	8.03e-05	0.002798	0.001745	Acly/Elovl6/Fasn/Insig1	4
ADIPO.upregulated	ADIPO	upregulated	GO:0016053	organic acid biosynthetic process	0.266667	276/16955	8.14e-05	0.002798	0.001745	Acly/Elovl6/Fasn/Insig1	4
ADIPO.upregulated	ADIPO	upregulated	GO:0006085	acetyl-CoA biosynthetic process	0.133333	17/16955	9.86e-05	0.003106	0.001937	Acly/Dlat	2
ADIPO.upregulated	ADIPO	upregulated	GO:0009150	purine ribonucleotide metabolic process	0.266667	299/16955	0.000111	0.003227	0.002013	Acly/Dlat/Hk2/Fasn	4
ADIPO.upregulated	ADIPO	upregulated	GO:0009259	ribonucleotide metabolic process	0.266667	309/16955	0.000126	0.003402	0.002122	Acly/Dlat/Hk2/Fasn	4
ADIPO.upregulated	ADIPO	upregulated	GO:0019693	ribose phosphate metabolic process	0.266667	319/16955	0.000142	0.00359	0.002239	Acly/Dlat/Hk2/Fasn	4
ADIPO.upregulated	ADIPO	upregulated	GO:0006163	purine nucleotide metabolic process	0.266667	328/16955	0.000159	0.003746	0.002337	Acly/Dlat/Hk2/Fasn	4
ADIPO.upregulated	ADIPO	upregulated	GO:0035384	thioester biosynthetic process	0.133333	24/16955	0.000199	0.004187	0.002612	Acly/Dlat	2
ADIPO.upregulated	ADIPO	upregulated	GO:0071616	acyl-CoA biosynthetic process	0.133333	24/16955	0.000199	0.004187	0.002612	Acly/Dlat	2
ADIPO.upregulated	ADIPO	upregulated	GO:0072521	purine-containing compound metabolic process	0.266667	365/16955	0.000239	0.004754	0.002965	Acly/Dlat/Hk2/Fasn	4
ADIPO.upregulated	ADIPO	upregulated	GO:0009117	nucleotide metabolic process	0.266667	401/16955	0.000342	0.00635	0.003961	Acly/Dlat/Hk2/Fasn	4
ADIPO.upregulated	ADIPO	upregulated	GO:0006753	nucleoside phosphate metabolic process	0.266667	408/16955	0.000365	0.00635	0.003961	Acly/Dlat/Hk2/Fasn	4
ADIPO.upregulated	ADIPO	upregulated	GO:0033866	nucleoside bisphosphate biosynthetic process	0.133333	34/16955	0.000403	0.00635	0.003961	Acly/Dlat	2
ADIPO.upregulated	ADIPO	upregulated	GO:0034030	ribonucleoside bisphosphate biosynthetic process	0.133333	34/16955	0.000403	0.00635	0.003961	Acly/Dlat	2
ADIPO.upregulated	ADIPO	upregulated	GO:0034033	purine nucleoside bisphosphate biosynthetic process	0.133333	34/16955	0.000403	0.00635	0.003961	Acly/Dlat	2
ADIPO.upregulated	ADIPO	upregulated	GO:0072595	maintenance of protein localization in organelle	0.133333	39/16955	0.000531	0.008032	0.00501	Hk2/Insig1	2
ADIPO.upregulated	ADIPO	upregulated	GO:0055086	nucleobase-containing small molecule metabolic process	0.266667	467/16955	0.000609	0.008856	0.005524	Acly/Dlat/Hk2/Fasn	4
ADIPO.upregulated	ADIPO	upregulated	GO:0050873	brown fat cell differentiation	0.133333	55/16955	0.001056	0.014782	0.009221	Fabp4/Pim1	2
ADIPO.upregulated	ADIPO	upregulated	GO:0045444	fat cell differentiation	0.2	238/16955	0.001097	0.014808	0.009237	Fabp4/Pim1/Insig1	3
ADIPO.upregulated	ADIPO	upregulated	GO:0006790	sulfur compound metabolic process	0.2	259/16955	0.001399	0.017978	0.011215	Acly/Dlat/Fasn	3
ADIPO.upregulated	ADIPO	upregulated	GO:0032507	maintenance of protein location in cell	0.133333	64/16955	0.001427	0.017978	0.011215	Hk2/Insig1	2
ADIPO.upregulated	ADIPO	upregulated	GO:0044272	sulfur compound biosynthetic process	0.133333	82/16955	0.002329	0.028399	0.017715	Acly/Dlat	2
ADIPO.upregulated	ADIPO	upregulated	GO:0042632	cholesterol homeostasis	0.133333	85/16955	0.0025	0.029301	0.018277	Fabp4/Insig1	2
ADIPO.upregulated	ADIPO	upregulated	GO:0055092	sterol homeostasis	0.133333	86/16955	0.002558	0.029301	0.018277	Fabp4/Insig1	2
ADIPO.upregulated	ADIPO	upregulated	GO:0046486	glycerolipid metabolic process	0.2	336/16955	0.00294	0.031778	0.019823	Agpat2/Thrsp/Insig1	3
ADIPO.upregulated	ADIPO	upregulated	GO:0045185	maintenance of protein location	0.133333	94/16955	0.003047	0.031778	0.019823	Hk2/Insig1	2
ADIPO.upregulated	ADIPO	upregulated	GO:0120162	positive regulation of cold-induced thermogenesis	0.133333	94/16955	0.003047	0.031778	0.019823	Fabp4/Elovl6	2
ADIPO.upregulated	ADIPO	upregulated	GO:0006641	triglyceride metabolic process	0.133333	95/16955	0.003111	0.031778	0.019823	Thrsp/Insig1	2
ADIPO.upregulated	ADIPO	upregulated	GO:0006090	pyruvate metabolic process	0.133333	107/16955	0.003927	0.039059	0.024364	Dlat/Hk2	2
ADIPO.upregulated	ADIPO	upregulated	GO:0090407	organophosphate biosynthetic process	0.2	408/16955	0.005074	0.049181	0.030678	Acly/Dlat/Agpat2	3
ADIPO.upregulated	ADIPO	upregulated	GO:0006639	acylglycerol metabolic process	0.133333	124/16955	0.005235	0.049467	0.030857	Thrsp/Insig1	2
ADIPO.upregulated	ADIPO	upregulated	GO:0006638	neutral lipid metabolic process	0.133333	126/16955	0.0054	0.049786	0.031055	Thrsp/Insig1	2
CM.downregulated	CM	downregulated	GO:0060047	heart contraction	0.136752	208/16955	9.98e-13	2.22e-09	1.81e-09	Myl2/Smtn/Adra1a/Prkg1/Adra1b/Atp1a2/Chrm2/Hdac4/Crhr2/Tcap/Tnni3/Pde4d/Csrp3/Myl3/Ext1/Hrc	16
CM.downregulated	CM	downregulated	GO:0003015	heart process	0.136752	217/16955	1.92e-12	2.22e-09	1.81e-09	Myl2/Smtn/Adra1a/Prkg1/Adra1b/Atp1a2/Chrm2/Hdac4/Crhr2/Tcap/Tnni3/Pde4d/Csrp3/Myl3/Ext1/Hrc	16
CM.downregulated	CM	downregulated	GO:0008016	regulation of heart contraction	0.119658	171/16955	1.23e-11	9.52e-09	7.73e-09	Myl2/Smtn/Adra1a/Prkg1/Adra1b/Atp1a2/Chrm2/Hdac4/Crhr2/Tnni3/Pde4d/Csrp3/Myl3/Hrc	14
CM.downregulated	CM	downregulated	GO:0003013	circulatory system process	0.17094	479/16955	9.53e-11	5.53e-08	4.49e-08	Nav2/Slc27a1/Myl2/Smtn/Adra1a/Prkg1/Adra1b/Atp1a2/Chrm2/Angpt1/Hdac4/Crhr2/Tcap/Tnni3/Pde4d/Csrp3/Myl3/Ext1/Ptprm/Hrc	20
CM.downregulated	CM	downregulated	GO:0008015	blood circulation	0.162393	460/16955	3.55e-10	1.65e-07	1.34e-07	Nav2/Myl2/Smtn/Adra1a/Prkg1/Adra1b/Atp1a2/Chrm2/Angpt1/Hdac4/Crhr2/Tcap/Tnni3/Pde4d/Csrp3/Myl3/Ext1/Ptprm/Hrc	19
CM.downregulated	CM	downregulated	GO:1903522	regulation of blood circulation	0.119658	229/16955	6.07e-10	2.35e-07	1.91e-07	Myl2/Smtn/Adra1a/Prkg1/Adra1b/Atp1a2/Chrm2/Hdac4/Crhr2/Tnni3/Pde4d/Csrp3/Myl3/Hrc	14
CM.downregulated	CM	downregulated	GO:0006936	muscle contraction	0.128205	276/16955	7.31e-10	2.42e-07	1.97e-07	Myl2/Smtn/Adra1a/Prkg1/Adra1b/Atp1a2/Chrm2/Hdac4/Clcn1/Myom2/Tcap/Tnni3/Pde4d/Csrp3/Myl3	15
CM.downregulated	CM	downregulated	GO:0060048	cardiac muscle contraction	0.0940171	124/16955	9.21e-10	2.67e-07	2.17e-07	Myl2/Smtn/Adra1a/Adra1b/Atp1a2/Hdac4/Tcap/Tnni3/Pde4d/Csrp3/Myl3	11
CM.downregulated	CM	downregulated	GO:0003012	muscle system process	0.136752	381/16955	7.88e-09	2.03e-06	1.65e-06	Myl2/Smtn/Adra1a/Prkg1/Adra1b/Atp1a2/Chrm2/Hdac4/Clcn1/Myom2/Tcap/Tnni3/Pde4d/Csrp3/Myl3/Gsn	16
CM.downregulated	CM	downregulated	GO:0006941	striated muscle contraction	0.0940171	156/16955	1.05e-08	2.44e-06	1.99e-06	Myl2/Smtn/Adra1a/Adra1b/Atp1a2/Hdac4/Tcap/Tnni3/Pde4d/Csrp3/Myl3	11
CM.downregulated	CM	downregulated	GO:0014706	striated muscle tissue development	0.136752	402/16955	1.68e-08	3.54e-06	2.87e-06	Myl2/Acadm/Rbfox1/Adra1a/Prkg1/Fgf1/Adra1b/Angpt1/Hdac4/Crhr2/Tcap/Tnni3/Ripor2/Csrp3/Myl3/Nr4a1	16
CM.downregulated	CM	downregulated	GO:0060537	muscle tissue development	0.136752	423/16955	3.41e-08	6.6e-06	5.36e-06	Myl2/Acadm/Rbfox1/Adra1a/Prkg1/Fgf1/Adra1b/Angpt1/Hdac4/Crhr2/Tcap/Tnni3/Ripor2/Csrp3/Myl3/Nr4a1	16
CM.downregulated	CM	downregulated	GO:0002026	regulation of the force of heart contraction	0.0512821	29/16955	3.96e-08	7.06e-06	5.74e-06	Myl2/Adra1a/Adra1b/Atp1a2/Csrp3/Myl3	6
CM.downregulated	CM	downregulated	GO:0006937	regulation of muscle contraction	0.0854701	144/16955	5.86e-08	9.71e-06	7.89e-06	Smtn/Adra1a/Prkg1/Adra1b/Atp1a2/Chrm2/Hdac4/Tnni3/Pde4d/Myl3	10
CM.downregulated	CM	downregulated	GO:0006942	regulation of striated muscle contraction	0.0683761	82/16955	9.41e-08	1.45e-05	1.18e-05	Smtn/Adra1a/Adra1b/Atp1a2/Hdac4/Tnni3/Pde4d/Myl3	8
CM.downregulated	CM	downregulated	GO:0055117	regulation of cardiac muscle contraction	0.0598291	68/16955	4.26e-07	6.17e-05	5.01e-05	Smtn/Adra1a/Adra1b/Atp1a2/Hdac4/Tnni3/Pde4d	7
CM.downregulated	CM	downregulated	GO:0048738	cardiac muscle tissue development	0.0940171	239/16955	8.1e-07	0.00011	8.97e-05	Myl2/Acadm/Adra1a/Prkg1/Fgf1/Adra1b/Angpt1/Tcap/Tnni3/Csrp3/Myl3	11
CM.downregulated	CM	downregulated	GO:0007517	muscle organ development	0.111111	372/16955	1.75e-06	0.000225	0.000183	Myl2/Rbfox1/Angpt1/Hdac4/Crhr2/Tcap/Tnni3/Lama5/Ripor2/Csrp3/Myl3/Nr4a1/Cryab	13
CM.downregulated	CM	downregulated	GO:0006109	regulation of carbohydrate metabolic process	0.0769231	180/16955	4.33e-06	0.000505	0.000411	Acacb/Acadm/Pdk4/Prkg1/Adra1b/Rora/Hdac4/Pfkfb1/Mlxipl	9
CM.downregulated	CM	downregulated	GO:0090257	regulation of muscle system process	0.0854701	230/16955	4.36e-06	0.000505	0.000411	Smtn/Adra1a/Prkg1/Adra1b/Atp1a2/Chrm2/Hdac4/Tnni3/Pde4d/Myl3	10
CM.downregulated	CM	downregulated	GO:0001976	nervous system process involved in regulation of systemic arterial blood pressure	0.034188	17/16955	4.78e-06	0.000528	0.000429	Nav2/Adra1a/Adra1b/Tnni3	4
CM.downregulated	CM	downregulated	GO:0006631	fatty acid metabolic process	0.102564	356/16955	6.47e-06	0.000682	0.000554	Hadhb/Acsl1/Hadha/Slc27a1/Lpl/Acaa2/Acacb/Acadm/Pdk4/Lpin1/Ucp3/Mlxipl	12
CM.downregulated	CM	downregulated	GO:0010675	regulation of cellular carbohydrate metabolic process	0.0683761	150/16955	9.4e-06	0.000948	0.00077	Acacb/Acadm/Pdk4/Prkg1/Adra1b/Rora/Hdac4/Pfkfb1	8
CM.downregulated	CM	downregulated	GO:0044262	cellular carbohydrate metabolic process	0.0854701	275/16955	2.08e-05	0.002006	0.00163	Acacb/Acadm/Pdk4/Prkg1/Adra1b/Rora/Hdac4/Pfkfb1/Phkg1/Ext1	10
CM.downregulated	CM	downregulated	GO:0035024	negative regulation of Rho protein signal transduction	0.034188	25/16955	2.44e-05	0.002259	0.001836	Adra1a/Adra1b/Dlc1/Ripor2	4
CM.downregulated	CM	downregulated	GO:0007626	locomotory behavior	0.0769231	225/16955	2.6e-05	0.002316	0.001882	Nav2/Kcnd2/Adra1b/Atp1a2/Sobp/Fign/Hexb/Fgf14/Grm1	9
CM.downregulated	CM	downregulated	GO:0008217	regulation of blood pressure	0.0683761	175/16955	2.88e-05	0.002446	0.001988	Nav2/Smtn/Adra1a/Adra1b/Atp1a2/Crhr2/Tnni3/Ext1	8
CM.downregulated	CM	downregulated	GO:0055007	cardiac muscle cell differentiation	0.0598291	128/16955	2.95e-05	0.002446	0.001988	Myl2/Acadm/Adra1a/Prkg1/Adra1b/Tcap/Csrp3	7
CM.downregulated	CM	downregulated	GO:0055002	striated muscle cell development	0.0683761	177/16955	3.12e-05	0.002495	0.002027	Myl2/Adra1a/Prkg1/Adra1b/Hdac4/Tcap/Ripor2/Csrp3	8
CM.downregulated	CM	downregulated	GO:0045822	negative regulation of heart contraction	0.034188	28/16955	3.88e-05	0.002936	0.002385	Adra1a/Prkg1/Atp1a2/Pde4d	4
CM.downregulated	CM	downregulated	GO:0055013	cardiac muscle cell development	0.0512821	91/16955	3.92e-05	0.002936	0.002385	Myl2/Adra1a/Prkg1/Adra1b/Tcap/Csrp3	6
CM.downregulated	CM	downregulated	GO:0009150	purine ribonucleotide metabolic process	0.0854701	299/16955	4.23e-05	0.003066	0.002492	Acsl1/Acaa2/Acacb/Pdk4/Rora/Hdac4/Eno3/Atp5a1/Pde4d/Mlxipl	10
CM.downregulated	CM	downregulated	GO:0006940	regulation of smooth muscle contraction	0.042735	58/16955	4.91e-05	0.003453	0.002806	Adra1a/Prkg1/Atp1a2/Chrm2/Tnni3	5
CM.downregulated	CM	downregulated	GO:0055001	muscle cell development	0.0683761	192/16955	5.56e-05	0.003526	0.002865	Myl2/Adra1a/Prkg1/Adra1b/Hdac4/Tcap/Ripor2/Csrp3	8
CM.downregulated	CM	downregulated	GO:0009259	ribonucleotide metabolic process	0.0854701	309/16955	5.58e-05	0.003526	0.002865	Acsl1/Acaa2/Acacb/Pdk4/Rora/Hdac4/Eno3/Atp5a1/Pde4d/Mlxipl	10
CM.downregulated	CM	downregulated	GO:0009062	fatty acid catabolic process	0.0512821	97/16955	5.63e-05	0.003526	0.002865	Hadhb/Hadha/Acaa2/Acacb/Acadm/Lpin1	6
CM.downregulated	CM	downregulated	GO:0055006	cardiac cell development	0.0512821	97/16955	5.63e-05	0.003526	0.002865	Myl2/Adra1a/Prkg1/Adra1b/Tcap/Csrp3	6
CM.downregulated	CM	downregulated	GO:0019395	fatty acid oxidation	0.0512821	100/16955	6.67e-05	0.004073	0.003309	Hadhb/Hadha/Acaa2/Acacb/Acadm/Pdk4	6
CM.downregulated	CM	downregulated	GO:0044242	cellular lipid catabolic process	0.0683761	198/16955	6.9e-05	0.004106	0.003336	Hadhb/Hadha/Lpl/Acaa2/Acacb/Acadm/Lpin1/Hexb	8
CM.downregulated	CM	downregulated	GO:0019693	ribose phosphate metabolic process	0.0854701	319/16955	7.28e-05	0.004218	0.003427	Acsl1/Acaa2/Acacb/Pdk4/Rora/Hdac4/Eno3/Atp5a1/Pde4d/Mlxipl	10
CM.downregulated	CM	downregulated	GO:0006939	smooth muscle contraction	0.0512821	103/16955	7.87e-05	0.004453	0.003618	Adra1a/Prkg1/Atp1a2/Chrm2/Tnni3/Pde4d	6
CM.downregulated	CM	downregulated	GO:0003018	vascular process in circulatory system	0.0683761	204/16955	8.51e-05	0.004698	0.003817	Slc27a1/Adra1a/Prkg1/Adra1b/Atp1a2/Angpt1/Ext1/Ptprm	8
CM.downregulated	CM	downregulated	GO:0034440	lipid oxidation	0.0512821	105/16955	8.76e-05	0.004725	0.003839	Hadhb/Hadha/Acaa2/Acacb/Acadm/Pdk4	6
CM.downregulated	CM	downregulated	GO:0006163	purine nucleotide metabolic process	0.0854701	328/16955	9.16e-05	0.004828	0.003923	Acsl1/Acaa2/Acacb/Pdk4/Rora/Hdac4/Eno3/Atp5a1/Pde4d/Mlxipl	10
CM.downregulated	CM	downregulated	GO:0055008	cardiac muscle tissue morphogenesis	0.042735	67/16955	9.86e-05	0.004978	0.004045	Myl2/Angpt1/Tcap/Tnni3/Myl3	5
CM.downregulated	CM	downregulated	GO:0062012	regulation of small molecule metabolic process	0.0854701	331/16955	9.88e-05	0.004978	0.004045	Acacb/Acadm/Pdk4/Prkg1/Fgf1/Adra1b/Rora/Hdac4/Pfkfb1/Mlxipl	10
CM.downregulated	CM	downregulated	GO:0060979	vasculogenesis involved in coronary vascular morphogenesis	0.025641	14/16955	0.00011	0.005441	0.004421	Fgf1/Angpt1/Nrp1	3
CM.downregulated	CM	downregulated	GO:0006635	fatty acid beta-oxidation	0.042735	69/16955	0.000113	0.005482	0.004454	Hadhb/Hadha/Acaa2/Acacb/Acadm	5
CM.downregulated	CM	downregulated	GO:0019432	triglyceride biosynthetic process	0.034188	37/16955	0.000119	0.005646	0.004587	Acsl1/Slc27a1/Lpl/Lpin1	4
CM.downregulated	CM	downregulated	GO:0035051	cardiocyte differentiation	0.0598291	162/16955	0.000131	0.006091	0.004949	Myl2/Acadm/Adra1a/Prkg1/Adra1b/Tcap/Csrp3	7
CM.downregulated	CM	downregulated	GO:0072329	monocarboxylic acid catabolic process	0.0512821	114/16955	0.000138	0.006279	0.005101	Hadhb/Hadha/Acaa2/Acacb/Acadm/Lpin1	6
CM.downregulated	CM	downregulated	GO:0007512	adult heart development	0.025641	16/16955	0.000168	0.007378	0.005995	Adra1a/Adra1b/Tcap	3
CM.downregulated	CM	downregulated	GO:0060415	muscle tissue morphogenesis	0.042735	75/16955	0.000169	0.007378	0.005995	Myl2/Angpt1/Tcap/Tnni3/Myl3	5
CM.downregulated	CM	downregulated	GO:0045823	positive regulation of heart contraction	0.034188	41/16955	0.000179	0.00769	0.006249	Smtn/Adra1a/Adra1b/Crhr2	4
CM.downregulated	CM	downregulated	GO:0010906	regulation of glucose metabolic process	0.0512821	120/16955	0.000183	0.007711	0.006266	Acacb/Acadm/Pdk4/Adra1b/Rora/Pfkfb1	6
CM.downregulated	CM	downregulated	GO:0006874	cellular calcium ion homeostasis	0.0940171	431/16955	0.000195	0.008001	0.006501	Adra1a/Prkg1/Adra1b/Atp1a2/Itpr1/Hexb/Grm1/Tnni3/Pde4d/Csrp3/Hrc	11
CM.downregulated	CM	downregulated	GO:0051146	striated muscle cell differentiation	0.0769231	293/16955	0.000197	0.008001	0.006501	Myl2/Acadm/Adra1a/Prkg1/Adra1b/Hdac4/Tcap/Ripor2/Csrp3	9
CM.downregulated	CM	downregulated	GO:1903523	negative regulation of blood circulation	0.034188	43/16955	0.000216	0.008597	0.006985	Adra1a/Prkg1/Atp1a2/Pde4d	4
CM.downregulated	CM	downregulated	GO:0072521	purine-containing compound metabolic process	0.0854701	365/16955	0.000219	0.008597	0.006985	Acsl1/Acaa2/Acacb/Pdk4/Rora/Hdac4/Eno3/Atp5a1/Pde4d/Mlxipl	10
CM.downregulated	CM	downregulated	GO:0043434	response to peptide hormone	0.0769231	299/16955	0.000229	0.008836	0.007179	Hadha/Slc27a1/Lpl/Ghr/Pdk4/Tbc1d4/Lpin1/Csrp3/Nr4a1	9
CM.downregulated	CM	downregulated	GO:0048644	muscle organ morphogenesis	0.042735	81/16955	0.000242	0.009209	0.007482	Myl2/Angpt1/Tcap/Tnni3/Myl3	5
CM.downregulated	CM	downregulated	GO:0042692	muscle cell differentiation	0.0854701	372/16955	0.000255	0.009443	0.007673	Myl2/Acadm/Adra1a/Prkg1/Adra1b/Rora/Hdac4/Tcap/Ripor2/Csrp3	10
CM.downregulated	CM	downregulated	GO:0044272	sulfur compound biosynthetic process	0.042735	82/16955	0.000257	0.009443	0.007673	Acsl1/Acacb/Pdk4/Angpt1/Ext1	5
CM.downregulated	CM	downregulated	GO:0055074	calcium ion homeostasis	0.0940171	446/16955	0.000262	0.009482	0.007704	Adra1a/Prkg1/Adra1b/Atp1a2/Itpr1/Hexb/Grm1/Tnni3/Pde4d/Csrp3/Hrc	11
CM.downregulated	CM	downregulated	GO:0046460	neutral lipid biosynthetic process	0.034188	46/16955	0.000281	0.009763	0.007933	Acsl1/Slc27a1/Lpl/Lpin1	4
CM.downregulated	CM	downregulated	GO:0046463	acylglycerol biosynthetic process	0.034188	46/16955	0.000281	0.009763	0.007933	Acsl1/Slc27a1/Lpl/Lpin1	4
CM.downregulated	CM	downregulated	GO:0007202	activation of phospholipase C activity	0.025641	19/16955	0.000286	0.009763	0.007933	Adra1a/Dlc1/Arhgap6	3
CM.downregulated	CM	downregulated	GO:0055003	cardiac myofibril assembly	0.025641	19/16955	0.000286	0.009763	0.007933	Myl2/Tcap/Csrp3	3
CM.downregulated	CM	downregulated	GO:0072503	cellular divalent inorganic cation homeostasis	0.0940171	456/16955	0.000316	0.010625	0.008633	Adra1a/Prkg1/Adra1b/Atp1a2/Itpr1/Hexb/Grm1/Tnni3/Pde4d/Csrp3/Hrc	11
CM.downregulated	CM	downregulated	GO:0019932	second-messenger-mediated signaling	0.0854701	395/16955	0.000409	0.013564	0.011021	Adra1a/Prkg1/Adra1b/Itpr1/Hdac4/Crhr2/Camta1/Grm1/Tnni3/Pde4d	10
CM.downregulated	CM	downregulated	GO:0006790	sulfur compound metabolic process	0.0683761	259/16955	0.000433	0.01413	0.011481	Acsl1/Acaa2/Hs3st5/Acacb/Ghr/Pdk4/Angpt1/Ext1	8
CM.downregulated	CM	downregulated	GO:0009117	nucleotide metabolic process	0.0854701	401/16955	0.000461	0.014839	0.012057	Acsl1/Acaa2/Acacb/Pdk4/Rora/Hdac4/Eno3/Atp5a1/Pde4d/Mlxipl	10
CM.downregulated	CM	downregulated	GO:0072507	divalent inorganic cation homeostasis	0.0940171	479/16955	0.000479	0.015204	0.012353	Adra1a/Prkg1/Adra1b/Atp1a2/Itpr1/Hexb/Grm1/Tnni3/Pde4d/Csrp3/Hrc	11
CM.downregulated	CM	downregulated	GO:0043542	endothelial cell migration	0.0598291	201/16955	0.000489	0.015337	0.012461	Fgf1/Angpt1/Nrp1/Atp5a1/Ccbe1/Nr4a1/Ptprm	7
CM.downregulated	CM	downregulated	GO:0043410	positive regulation of MAPK cascade	0.0940171	483/16955	0.000513	0.015862	0.012888	Ghr/Adra1a/Fgf1/Adra1b/Angpt1/Crhr2/Sh3rf2/Nrp1/Grm1/Tnik/Pdgfd	11
CM.downregulated	CM	downregulated	GO:0071417	cellular response to organonitrogen compound	0.0940171	484/16955	0.000522	0.015878	0.012901	Lpl/Ghr/Pdk4/Itpr1/Tbc1d4/Lpin1/Pde4d/Pdgfd/Csrp3/Nr4a1/Cpeb3	11
CM.downregulated	CM	downregulated	GO:0006753	nucleoside phosphate metabolic process	0.0854701	408/16955	0.000527	0.015878	0.012901	Acsl1/Acaa2/Acacb/Pdk4/Rora/Hdac4/Eno3/Atp5a1/Pde4d/Mlxipl	10
CM.downregulated	CM	downregulated	GO:0031032	actomyosin structure organization	0.0598291	204/16955	0.000535	0.015894	0.012914	Limch1/Myl2/Dlc1/Nrp1/Tcap/Arhgap6/Csrp3	7
CM.downregulated	CM	downregulated	GO:0003073	regulation of systemic arterial blood pressure	0.042735	97/16955	0.000558	0.016231	0.013188	Nav2/Smtn/Adra1a/Adra1b/Tnni3	5
CM.downregulated	CM	downregulated	GO:0046580	negative regulation of Ras protein signal transduction	0.034188	55/16955	0.00056	0.016231	0.013188	Adra1a/Adra1b/Dlc1/Ripor2	4
CM.downregulated	CM	downregulated	GO:0035384	thioester biosynthetic process	0.025641	24/16955	0.000583	0.016491	0.013399	Acsl1/Acacb/Pdk4	3
CM.downregulated	CM	downregulated	GO:0071616	acyl-CoA biosynthetic process	0.025641	24/16955	0.000583	0.016491	0.013399	Acsl1/Acacb/Pdk4	3
CM.downregulated	CM	downregulated	GO:0010595	positive regulation of endothelial cell migration	0.042735	99/16955	0.000613	0.017122	0.013912	Fgf1/Angpt1/Nrp1/Atp5a1/Ccbe1	5
CM.downregulated	CM	downregulated	GO:0003300	cardiac muscle hypertrophy	0.042735	100/16955	0.000642	0.017711	0.014391	Adra1a/Prkg1/Adra1b/Tcap/Csrp3	5
CM.downregulated	CM	downregulated	GO:0051893	regulation of focal adhesion assembly	0.034188	58/16955	0.000686	0.018406	0.014955	Limch1/Dlc1/Nrp1/Arhgap6	4
CM.downregulated	CM	downregulated	GO:0090109	regulation of cell-substrate junction assembly	0.034188	58/16955	0.000686	0.018406	0.014955	Limch1/Dlc1/Nrp1/Arhgap6	4
CM.downregulated	CM	downregulated	GO:0032868	response to insulin	0.0598291	213/16955	0.000691	0.018406	0.014955	Hadha/Slc27a1/Lpl/Pdk4/Tbc1d4/Lpin1/Csrp3	7
CM.downregulated	CM	downregulated	GO:0016042	lipid catabolic process	0.0683761	280/16955	0.000722	0.018755	0.015239	Hadhb/Hadha/Lpl/Acaa2/Acacb/Acadm/Lpin1/Hexb	8
CM.downregulated	CM	downregulated	GO:0031532	actin cytoskeleton reorganization	0.042735	103/16955	0.000734	0.018755	0.015239	Lpin1/Nrp1/Tnik/Auts2/Gsn	5
CM.downregulated	CM	downregulated	GO:0061437	renal system vasculature development	0.025641	26/16955	0.000742	0.018755	0.015239	Angpt1/Nrp1/Pdgfd	3
CM.downregulated	CM	downregulated	GO:0061440	kidney vasculature development	0.025641	26/16955	0.000742	0.018755	0.015239	Angpt1/Nrp1/Pdgfd	3
CM.downregulated	CM	downregulated	GO:0010594	regulation of endothelial cell migration	0.0512821	156/16955	0.000744	0.018755	0.015239	Fgf1/Angpt1/Nrp1/Atp5a1/Ccbe1/Ptprm	6
CM.downregulated	CM	downregulated	GO:0014897	striated muscle hypertrophy	0.042735	104/16955	0.000767	0.019119	0.015534	Adra1a/Prkg1/Adra1b/Tcap/Csrp3	5
CM.downregulated	CM	downregulated	GO:0035296	regulation of tube diameter	0.0512821	159/16955	0.000822	0.019381	0.015747	Adra1a/Prkg1/Adra1b/Atp1a2/Ext1/Ptprm	6
CM.downregulated	CM	downregulated	GO:0097746	regulation of blood vessel diameter	0.0512821	159/16955	0.000822	0.019381	0.015747	Adra1a/Prkg1/Adra1b/Atp1a2/Ext1/Ptprm	6
CM.downregulated	CM	downregulated	GO:0051058	negative regulation of small GTPase mediated signal transduction	0.034188	61/16955	0.00083	0.019381	0.015747	Adra1a/Adra1b/Dlc1/Ripor2	4
CM.downregulated	CM	downregulated	GO:0150116	regulation of cell-substrate junction organization	0.034188	61/16955	0.00083	0.019381	0.015747	Limch1/Dlc1/Nrp1/Arhgap6	4
CM.downregulated	CM	downregulated	GO:0010460	positive regulation of heart rate	0.025641	27/16955	0.00083	0.019381	0.015747	Adra1a/Adra1b/Crhr2	3
CM.downregulated	CM	downregulated	GO:0014896	muscle hypertrophy	0.042735	106/16955	0.000836	0.019381	0.015747	Adra1a/Prkg1/Adra1b/Tcap/Csrp3	5
CM.downregulated	CM	downregulated	GO:0120034	positive regulation of plasma membrane bounded cell projection assembly	0.042735	106/16955	0.000836	0.019381	0.015747	Hdac4/Nrp1/Auts2/Ripor2/Rp1	5
CM.downregulated	CM	downregulated	GO:0035150	regulation of tube size	0.0512821	160/16955	0.000849	0.019497	0.015841	Adra1a/Prkg1/Adra1b/Atp1a2/Ext1/Ptprm	6
CM.downregulated	CM	downregulated	GO:0032231	regulation of actin filament bundle assembly	0.042735	107/16955	0.000872	0.019824	0.016107	Limch1/Dlc1/Nrp1/Arhgap6/Synpo2	5
CM.downregulated	CM	downregulated	GO:0032870	cellular response to hormone stimulus	0.0854701	438/16955	0.000909	0.020238	0.016443	Acsl1/Slc27a1/Lpl/Ghr/Pdk4/Atp1a2/Tbc1d4/Lpin1/Csrp3/Nr4a1	10
CM.downregulated	CM	downregulated	GO:1901652	response to peptide	0.0769231	362/16955	0.00091	0.020238	0.016443	Hadha/Slc27a1/Lpl/Ghr/Pdk4/Tbc1d4/Lpin1/Csrp3/Nr4a1	9
CM.downregulated	CM	downregulated	GO:0010863	positive regulation of phospholipase C activity	0.025641	28/16955	0.000925	0.020238	0.016443	Adra1a/Dlc1/Arhgap6	3
CM.downregulated	CM	downregulated	GO:0035767	endothelial cell chemotaxis	0.025641	28/16955	0.000925	0.020238	0.016443	Fgf1/Nrp1/Nr4a1	3
CM.downregulated	CM	downregulated	GO:0060419	heart growth	0.042735	110/16955	0.000988	0.021403	0.01739	Acacb/Adra1a/Prkg1/Fgf1/Adra1b	5
CM.downregulated	CM	downregulated	GO:0048747	muscle fiber development	0.034188	65/16955	0.001054	0.022636	0.018392	Myl2/Hdac4/Tcap/Ripor2	4
CM.downregulated	CM	downregulated	GO:0060977	coronary vasculature morphogenesis	0.025641	30/16955	0.001135	0.023985	0.019488	Fgf1/Angpt1/Nrp1	3
CM.downregulated	CM	downregulated	GO:0071375	cellular response to peptide hormone stimulus	0.0598291	232/16955	0.001138	0.023985	0.019488	Lpl/Ghr/Pdk4/Tbc1d4/Lpin1/Csrp3/Nr4a1	7
CM.downregulated	CM	downregulated	GO:0006084	acetyl-CoA metabolic process	0.025641	32/16955	0.001373	0.028137	0.022861	Acaa2/Acacb/Pdk4	3
CM.downregulated	CM	downregulated	GO:1900274	regulation of phospholipase C activity	0.025641	32/16955	0.001373	0.028137	0.022861	Adra1a/Dlc1/Arhgap6	3
CM.downregulated	CM	downregulated	GO:0071214	cellular response to abiotic stimulus	0.0598291	240/16955	0.001383	0.028137	0.022861	Atp1a2/Cradd/Grm1/Ripor2/Rcsd1/Rp1/Cryab	7
CM.downregulated	CM	downregulated	GO:0104004	cellular response to environmental stimulus	0.0598291	240/16955	0.001383	0.028137	0.022861	Atp1a2/Cradd/Grm1/Ripor2/Rcsd1/Rp1/Cryab	7
CM.downregulated	CM	downregulated	GO:0055086	nucleobase-containing small molecule metabolic process	0.0854701	467/16955	0.001471	0.029659	0.024098	Acsl1/Acaa2/Acacb/Pdk4/Rora/Hdac4/Eno3/Atp5a1/Pde4d/Mlxipl	10
CM.downregulated	CM	downregulated	GO:0071260	cellular response to mechanical stimulus	0.025641	33/16955	0.001502	0.030036	0.024405	Atp1a2/Cradd/Ripor2	3
CM.downregulated	CM	downregulated	GO:0060976	coronary vasculature development	0.034188	72/16955	0.001544	0.030598	0.024861	Fgf1/Angpt1/Nrp1/Ltbp1	4
CM.downregulated	CM	downregulated	GO:0033866	nucleoside bisphosphate biosynthetic process	0.025641	34/16955	0.00164	0.031686	0.025745	Acsl1/Acacb/Pdk4	3
CM.downregulated	CM	downregulated	GO:0034030	ribonucleoside bisphosphate biosynthetic process	0.025641	34/16955	0.00164	0.031686	0.025745	Acsl1/Acacb/Pdk4	3
CM.downregulated	CM	downregulated	GO:0034033	purine nucleoside bisphosphate biosynthetic process	0.025641	34/16955	0.00164	0.031686	0.025745	Acsl1/Acacb/Pdk4	3
CM.downregulated	CM	downregulated	GO:0032970	regulation of actin filament-based process	0.0769231	396/16955	0.001696	0.032445	0.026362	Limch1/Atp1a2/Dlc1/Nrp1/Arhgap6/Pde4d/Synpo2/Csrp3/Gsn	9
CM.downregulated	CM	downregulated	GO:0003007	heart morphogenesis	0.0598291	249/16955	0.001707	0.032445	0.026362	Myl2/Angpt1/Dlc1/Nrp1/Tcap/Tnni3/Myl3	7
CM.downregulated	CM	downregulated	GO:0006006	glucose metabolic process	0.0512821	186/16955	0.001838	0.03438	0.027934	Acacb/Acadm/Pdk4/Adra1b/Rora/Pfkfb1	6
CM.downregulated	CM	downregulated	GO:0035265	organ growth	0.0512821	186/16955	0.001838	0.03438	0.027934	Acacb/Adra1a/Prkg1/Fgf1/Adra1b/Ext1	6
CM.downregulated	CM	downregulated	GO:0033674	positive regulation of kinase activity	0.0854701	484/16955	0.001914	0.035511	0.028853	Acsl1/Slc27a1/Ghr/Adra1a/Fgf1/Angpt1/Grm1/Tnik/Pfkfb1/Pdgfd	10
CM.downregulated	CM	downregulated	GO:0016052	carbohydrate catabolic process	0.042735	129/16955	0.002003	0.036856	0.029946	Adra1b/Hdac4/Eno3/Hexb/Mlxipl	5
CM.downregulated	CM	downregulated	GO:0006637	acyl-CoA metabolic process	0.034188	78/16955	0.002074	0.037279	0.030289	Acsl1/Acaa2/Acacb/Pdk4	4
CM.downregulated	CM	downregulated	GO:0035383	thioester metabolic process	0.034188	78/16955	0.002074	0.037279	0.030289	Acsl1/Acaa2/Acacb/Pdk4	4
CM.downregulated	CM	downregulated	GO:0048041	focal adhesion assembly	0.034188	78/16955	0.002074	0.037279	0.030289	Limch1/Dlc1/Nrp1/Arhgap6	4
CM.downregulated	CM	downregulated	GO:0031589	cell-substrate adhesion	0.0683761	333/16955	0.002174	0.038489	0.031273	Limch1/Itgb6/Sned1/Angpt1/Dlc1/Nrp1/Arhgap6/Lama5	8
CM.downregulated	CM	downregulated	GO:0051480	regulation of cytosolic calcium ion concentration	0.0683761	333/16955	0.002174	0.038489	0.031273	Adra1a/Prkg1/Adra1b/Atp1a2/Itpr1/Grm1/Pde4d/Hrc	8
CM.downregulated	CM	downregulated	GO:0009409	response to cold	0.025641	38/16955	0.002266	0.039595	0.032171	Slc27a1/Acadm/Ucp3	3
CM.downregulated	CM	downregulated	GO:0001666	response to hypoxia	0.0512821	194/16955	0.002272	0.039595	0.032171	Acaa2/Kcnd2/Itpr1/Rora/Ucp3/Cryab	6
CM.downregulated	CM	downregulated	GO:1902532	negative regulation of intracellular signal transduction	0.0854701	496/16955	0.002288	0.039595	0.032171	Adra1a/Adra1b/Itpr1/Rora/Dlc1/Crhr2/Sh3rf2/Pde4d/Ripor2/Wnk2	10
CM.downregulated	CM	downregulated	GO:0045860	positive regulation of protein kinase activity	0.0769231	415/16955	0.00233	0.039746	0.032294	Acsl1/Slc27a1/Ghr/Adra1a/Fgf1/Angpt1/Grm1/Tnik/Pdgfd	9
CM.downregulated	CM	downregulated	GO:0019722	calcium-mediated signaling	0.0512821	195/16955	0.002331	0.039746	0.032294	Itpr1/Hdac4/Camta1/Grm1/Tnni3/Pde4d	6
CM.downregulated	CM	downregulated	GO:0072006	nephron development	0.042735	134/16955	0.002364	0.040014	0.032512	Fgf1/Angpt1/Lama5/Pdgfd/Ext1	5
CM.downregulated	CM	downregulated	GO:1903524	positive regulation of blood circulation	0.034188	82/16955	0.00249	0.041005	0.033317	Smtn/Adra1a/Adra1b/Crhr2	4
CM.downregulated	CM	downregulated	GO:0001767	establishment of lymphocyte polarity	0.017094	11/16955	0.002493	0.041005	0.033317	Ripor2/Gsn	2
CM.downregulated	CM	downregulated	GO:0001768	establishment of T cell polarity	0.017094	11/16955	0.002493	0.041005	0.033317	Ripor2/Gsn	2
CM.downregulated	CM	downregulated	GO:0060452	positive regulation of cardiac muscle contraction	0.017094	11/16955	0.002493	0.041005	0.033317	Smtn/Adra1a	2
CM.downregulated	CM	downregulated	GO:0036293	response to decreased oxygen levels	0.0512821	199/16955	0.002579	0.042123	0.034225	Acaa2/Kcnd2/Itpr1/Rora/Ucp3/Cryab	6
CM.downregulated	CM	downregulated	GO:0035023	regulation of Rho protein signal transduction	0.042735	138/16955	0.002686	0.043056	0.034983	Adra1a/Adra1b/Dlc1/Nrp1/Ripor2	5
CM.downregulated	CM	downregulated	GO:0060326	cell chemotaxis	0.0598291	270/16955	0.002692	0.043056	0.034983	Fgf1/Camk1d/Nrp1/Pde4d/Ripor2/Pdgfd/Nr4a1	7
CM.downregulated	CM	downregulated	GO:0007160	cell-matrix adhesion	0.0512821	201/16955	0.002711	0.043056	0.034983	Limch1/Itgb6/Sned1/Dlc1/Nrp1/Arhgap6	6
CM.downregulated	CM	downregulated	GO:1901888	regulation of cell junction assembly	0.0512821	201/16955	0.002711	0.043056	0.034983	Limch1/Cux2/Dlc1/Nrp1/Colq/Arhgap6	6
CM.downregulated	CM	downregulated	GO:0003298	physiological muscle hypertrophy	0.025641	41/16955	0.00282	0.043894	0.035665	Adra1a/Prkg1/Adra1b	3
CM.downregulated	CM	downregulated	GO:0003301	physiological cardiac muscle hypertrophy	0.025641	41/16955	0.00282	0.043894	0.035665	Adra1a/Prkg1/Adra1b	3
CM.downregulated	CM	downregulated	GO:0061049	cell growth involved in cardiac muscle cell development	0.025641	41/16955	0.00282	0.043894	0.035665	Adra1a/Prkg1/Adra1b	3
CM.downregulated	CM	downregulated	GO:0071902	positive regulation of protein serine/threonine kinase activity	0.0598291	275/16955	0.00298	0.046073	0.037435	Acsl1/Slc27a1/Ghr/Fgf1/Grm1/Tnik/Pdgfd	7
CM.downregulated	CM	downregulated	GO:1901653	cellular response to peptide	0.0598291	277/16955	0.003102	0.047638	0.038707	Lpl/Ghr/Pdk4/Tbc1d4/Lpin1/Csrp3/Nr4a1	7
CM.downregulated	CM	downregulated	GO:0009612	response to mechanical stimulus	0.042735	143/16955	0.003131	0.047764	0.038809	Atp1a2/Cradd/Tcap/Ripor2/Csrp3	5
CM.downregulated	CM	downregulated	GO:0007044	cell-substrate junction assembly	0.034188	88/16955	0.003216	0.048363	0.039296	Limch1/Dlc1/Nrp1/Arhgap6	4
CM.downregulated	CM	downregulated	GO:0010518	positive regulation of phospholipase activity	0.025641	43/16955	0.003233	0.048363	0.039296	Adra1a/Dlc1/Arhgap6	3
CM.downregulated	CM	downregulated	GO:1990573	potassium ion import across plasma membrane	0.025641	43/16955	0.003233	0.048363	0.039296	Kcnj3/Atp1a2/Wnk2	3
CM.downregulated	CM	downregulated	GO:0010634	positive regulation of epithelial cell migration	0.042735	145/16955	0.003323	0.049397	0.040135	Fgf1/Angpt1/Nrp1/Atp5a1/Ccbe1	5
CM.downregulated	CM	downregulated	GO:0010631	epithelial cell migration	0.0598291	281/16955	0.003357	0.049585	0.040288	Fgf1/Angpt1/Nrp1/Atp5a1/Ccbe1/Nr4a1/Ptprm	7
CM.downregulated	CM	downregulated	GO:0090132	epithelium migration	0.0598291	282/16955	0.003423	0.049624	0.04032	Fgf1/Angpt1/Nrp1/Atp5a1/Ccbe1/Nr4a1/Ptprm	7
CM.downregulated	CM	downregulated	GO:0016054	organic acid catabolic process	0.0512821	211/16955	0.003444	0.049624	0.04032	Hadhb/Hadha/Acaa2/Acacb/Acadm/Lpin1	6
CM.downregulated	CM	downregulated	GO:0046395	carboxylic acid catabolic process	0.0512821	211/16955	0.003444	0.049624	0.04032	Hadhb/Hadha/Acaa2/Acacb/Acadm/Lpin1	6
CM.downregulated	CM	downregulated	GO:1902903	regulation of supramolecular fiber organization	0.0683761	359/16955	0.003445	0.049624	0.04032	Limch1/Dlc1/Nrp1/Arhgap6/Synpo2/Rp1/Cryab/Gsn	8
CM.downregulated	CM	downregulated	GO:0090130	tissue migration	0.0598291	283/16955	0.00349	0.049847	0.040501	Fgf1/Angpt1/Nrp1/Atp5a1/Ccbe1/Nr4a1/Ptprm	7
CM.downregulated	CM	downregulated	GO:2000347	positive regulation of hepatocyte proliferation	0.017094	13/16955	0.003504	0.049847	0.040501	Fgf1/Itpr1	2
CM.downregulated	CM	downregulated	GO:0070482	response to oxygen levels	0.0512821	212/16955	0.003525	0.049847	0.040501	Acaa2/Kcnd2/Itpr1/Rora/Ucp3/Cryab	6
CM.upregulated	CM	upregulated	GO:0006418	tRNA aminoacylation for protein translation	0.056	39/16955	1.26e-08	1.91e-05	1.79e-05	Gars/Nars/Eprs/Lars/Iars/Yars/Sars	7
CM.upregulated	CM	upregulated	GO:0043039	tRNA aminoacylation	0.056	42/16955	2.18e-08	1.91e-05	1.79e-05	Gars/Nars/Eprs/Lars/Iars/Yars/Sars	7
CM.upregulated	CM	upregulated	GO:0043038	amino acid activation	0.056	43/16955	2.58e-08	1.91e-05	1.79e-05	Gars/Nars/Eprs/Lars/Iars/Yars/Sars	7
CM.upregulated	CM	upregulated	GO:0006986	response to unfolded protein	0.056	114/16955	2.14e-05	0.0119	0.011112	Ern1/Atf6/Hspa9/Nfe2l2/Herpud1/Rhbdd1/Clpb	7
CM.upregulated	CM	upregulated	GO:0034620	cellular response to unfolded protein	0.048	85/16955	3.87e-05	0.017199	0.01606	Ern1/Atf6/Hspa9/Nfe2l2/Herpud1/Rhbdd1	6
CM.upregulated	CM	upregulated	GO:0035966	response to topologically incorrect protein	0.056	137/16955	6.96e-05	0.025789	0.024081	Ern1/Atf6/Hspa9/Nfe2l2/Herpud1/Rhbdd1/Clpb	7
CM.upregulated	CM	upregulated	GO:0035967	cellular response to topologically incorrect protein	0.048	107/16955	0.00014	0.044495	0.041549	Ern1/Atf6/Hspa9/Nfe2l2/Herpud1/Rhbdd1	6
CM.upregulated	CM	upregulated	GO:0010769	regulation of cell morphogenesis involved in differentiation	0.08	333/16955	0.00018	0.049948	0.04664	Map1b/Rtn4/Pdlim5/Hecw2/Cdh4/Snap91/Actn4/Fstl4/Syne1/Picalm	10
EC.downregulated	EC	downregulated	GO:0040013	negative regulation of locomotion	0.238095	309/16955	3.12e-05	0.01494	0.009967	Ptprm/Dach1/Sema6a/Nav3/Nrp1	5
EC.downregulated	EC	downregulated	GO:0051271	negative regulation of cellular component movement	0.238095	310/16955	3.16e-05	0.01494	0.009967	Ptprm/Dach1/Sema6a/Nav3/Nrp1	5
EC.downregulated	EC	downregulated	GO:1901342	regulation of vasculature development	0.238095	336/16955	4.65e-05	0.01494	0.009967	Cd36/Ptprm/Sema6a/Egr1/Nrp1	5
EC.downregulated	EC	downregulated	GO:0007411	axon guidance	0.190476	217/16955	0.000132	0.025836	0.017237	Ptprm/Sema6a/Nrp1/Ablim1	4
EC.downregulated	EC	downregulated	GO:0097485	neuron projection guidance	0.190476	218/16955	0.000134	0.025836	0.017237	Ptprm/Sema6a/Nrp1/Ablim1	4
EC.downregulated	EC	downregulated	GO:0031290	retinal ganglion cell axon guidance	0.0952381	16/16955	0.000174	0.027877	0.018599	Ptprm/Nrp1	2
EC.downregulated	EC	downregulated	GO:0016525	negative regulation of angiogenesis	0.142857	117/16955	0.000389	0.034587	0.023075	Cd36/Ptprm/Sema6a	3
EC.downregulated	EC	downregulated	GO:2000181	negative regulation of blood vessel morphogenesis	0.142857	121/16955	0.000429	0.034587	0.023075	Cd36/Ptprm/Sema6a	3
EC.downregulated	EC	downregulated	GO:0048843	negative regulation of axon extension involved in axon guidance	0.0952381	25/16955	0.000431	0.034587	0.023075	Sema6a/Nrp1	2
EC.downregulated	EC	downregulated	GO:0045765	regulation of angiogenesis	0.190476	301/16955	0.000459	0.034587	0.023075	Cd36/Ptprm/Sema6a/Nrp1	4
EC.downregulated	EC	downregulated	GO:0061437	renal system vasculature development	0.0952381	26/16955	0.000466	0.034587	0.023075	Egr1/Nrp1	2
EC.downregulated	EC	downregulated	GO:0061440	kidney vasculature development	0.0952381	26/16955	0.000466	0.034587	0.023075	Egr1/Nrp1	2
EC.downregulated	EC	downregulated	GO:1902668	negative regulation of axon guidance	0.0952381	26/16955	0.000466	0.034587	0.023075	Sema6a/Nrp1	2
EC.downregulated	EC	downregulated	GO:1901343	negative regulation of vasculature development	0.142857	133/16955	0.000566	0.038969	0.025999	Cd36/Ptprm/Sema6a	3
EC.downregulated	EC	downregulated	GO:0048841	regulation of axon extension involved in axon guidance	0.0952381	31/16955	0.000665	0.042728	0.028507	Sema6a/Nrp1	2
EC.downregulated	EC	downregulated	GO:0048846	axon extension involved in axon guidance	0.0952381	35/16955	0.000848	0.048097	0.032089	Sema6a/Nrp1	2
EC.downregulated	EC	downregulated	GO:1902284	neuron projection extension involved in neuron projection guidance	0.0952381	35/16955	0.000848	0.048097	0.032089	Sema6a/Nrp1	2
EC.upregulated	EC	upregulated	GO:0022613	ribonucleoprotein complex biogenesis	0.173913	402/16955	2.91e-12	6.83e-09	5.65e-09	Rps27/Rpl6/Hsp90ab1/Rpl3/Hsp90aa1/Rps21/Rpl12/Rpl23a/Eif2s2/Rpl5/Rps25/Rps24/Rps17/Rps7/Rps16/Rpl10a/Rps8/Rpl13a/Rpl27/Rpl14	20
EC.upregulated	EC	upregulated	GO:0002181	cytoplasmic translation	0.0956522	86/16955	1.37e-11	1.61e-08	1.33e-08	Rpl6/Rps21/Eif2s2/Rpl15/Rpl39/Rps29/Rpl10a/Rpl19/Eef2/Rpl13a/Rps23	11
EC.upregulated	EC	upregulated	GO:0042254	ribosome biogenesis	0.13913	289/16955	1.11e-10	8.63e-08	7.15e-08	Rps27/Rpl6/Rpl3/Rps21/Rpl12/Rpl23a/Rpl5/Rps25/Rps24/Rps17/Rps7/Rps16/Rpl10a/Rps8/Rpl27/Rpl14	16
EC.upregulated	EC	upregulated	GO:0022618	ribonucleoprotein complex assembly	0.0956522	169/16955	2.02e-08	1.19e-05	9.82e-06	Rps27/Rpl6/Hsp90ab1/Rpl3/Hsp90aa1/Rpl12/Rpl23a/Eif2s2/Rpl5/Rps25/Rpl13a	11
EC.upregulated	EC	upregulated	GO:0042274	ribosomal small subunit biogenesis	0.0695652	72/16955	2.92e-08	1.19e-05	9.84e-06	Rps27/Rps21/Rps25/Rps24/Rps17/Rps7/Rps16/Rps8	8
EC.upregulated	EC	upregulated	GO:0071826	ribonucleoprotein complex subunit organization	0.0956522	176/16955	3.08e-08	1.19e-05	9.84e-06	Rps27/Rpl6/Hsp90ab1/Rpl3/Hsp90aa1/Rpl12/Rpl23a/Eif2s2/Rpl5/Rps25/Rpl13a	11
EC.upregulated	EC	upregulated	GO:0032963	collagen metabolic process	0.0782609	104/16955	3.55e-08	1.19e-05	9.84e-06	Vim/Ccn2/Col1a1/Col1a2/Mmp2/Ctsl/Tnxb/Got1/Ctsb	9
EC.upregulated	EC	upregulated	GO:0042026	protein refolding	0.0434783	18/16955	1.05e-07	3.08e-05	2.55e-05	Hspa8/Hspd1/Hsp90aa1/Hspa9/B2m	5
EC.upregulated	EC	upregulated	GO:0042255	ribosome assembly	0.0608696	63/16955	2.22e-07	5.79e-05	4.79e-05	Rps27/Rpl6/Rpl3/Rpl12/Rpl23a/Rpl5/Rps25	7
EC.upregulated	EC	upregulated	GO:0030198	extracellular matrix organization	0.104348	280/16955	4.42e-07	9.79e-05	8.1e-05	Ccn2/Col1a1/Postn/Col3a1/Col1a2/Ccdc80/Mmp2/Tnxb/Fbln2/Smoc2/Lum/Fbln1	12
EC.upregulated	EC	upregulated	GO:0043062	extracellular structure organization	0.104348	281/16955	4.59e-07	9.79e-05	8.1e-05	Ccn2/Col1a1/Postn/Col3a1/Col1a2/Ccdc80/Mmp2/Tnxb/Fbln2/Smoc2/Lum/Fbln1	12
EC.upregulated	EC	upregulated	GO:0042273	ribosomal large subunit biogenesis	0.0608696	71/16955	5.11e-07	9.97e-05	8.25e-05	Rpl6/Rpl3/Rpl12/Rpl23a/Rpl5/Rpl10a/Rpl14	7
EC.upregulated	EC	upregulated	GO:0006959	humoral immune response	0.0782609	153/16955	9.76e-07	0.000176	0.000146	Serping1/Rarres2/C3/B2m/C1qc/Rpl39/Gapdh/Cd81/C1qa	9
EC.upregulated	EC	upregulated	GO:0000027	ribosomal large subunit assembly	0.0434783	28/16955	1.14e-06	0.00019	0.000157	Rpl6/Rpl3/Rpl12/Rpl23a/Rpl5	5
EC.upregulated	EC	upregulated	GO:0006364	rRNA processing	0.0869565	203/16955	1.21e-06	0.00019	0.000157	Rps21/Rpl5/Rps24/Rps17/Rps7/Rps16/Rpl10a/Rps8/Rpl27/Rpl14	10
EC.upregulated	EC	upregulated	GO:0016072	rRNA metabolic process	0.0869565	211/16955	1.72e-06	0.000252	0.000209	Rps21/Rpl5/Rps24/Rps17/Rps7/Rps16/Rpl10a/Rps8/Rpl27/Rpl14	10
EC.upregulated	EC	upregulated	GO:1903362	regulation of cellular protein catabolic process	0.0869565	249/16955	7.52e-06	0.001038	0.000859	Apoe/Hsp90ab1/Lrp1/Ubb/Hsp90aa1/Rpl5/Rpl23/Cd81/Herpud1/Rps7	10
EC.upregulated	EC	upregulated	GO:0042176	regulation of protein catabolic process	0.104348	385/16955	1.19e-05	0.001551	0.001284	Apoe/Hsp90ab1/Lrp1/Ubb/Hsp90aa1/Timp2/Rpl5/Rpl23/Cd81/Herpud1/Rps7/Gja1	12
EC.upregulated	EC	upregulated	GO:0002455	humoral immune response mediated by circulating immunoglobulin	0.0434783	47/16955	1.61e-05	0.001924	0.001593	Serping1/C3/C1qc/Cd81/C1qa	5
EC.upregulated	EC	upregulated	GO:0031589	cell-substrate adhesion	0.0956522	333/16955	1.64e-05	0.001924	0.001593	Ccn2/Col1a1/Postn/Col3a1/Ccdc80/Lrp1/Tnxb/Fbln2/Smoc2/Cd63/Fbln1	11
EC.upregulated	EC	upregulated	GO:1901798	positive regulation of signal transduction by p53 class mediator	0.0347826	25/16955	2.28e-05	0.00254	0.002102	Ankrd1/Ubb/Rpl23/Rps7	4
EC.upregulated	EC	upregulated	GO:0071417	cellular response to organonitrogen compound	0.113043	484/16955	2.45e-05	0.002613	0.002163	Vim/Col1a1/Col3a1/Col1a2/Igfbp5/Mmp2/Gdf15/Lrp1/Rarres2/Rpl23/Col6a1/Gja1/Eprs	13
EC.upregulated	EC	upregulated	GO:0030199	collagen fibril organization	0.0434783	55/16955	3.49e-05	0.003441	0.002848	Col1a1/Col3a1/Col1a2/Tnxb/Lum	5
EC.upregulated	EC	upregulated	GO:1904667	negative regulation of ubiquitin protein ligase activity	0.026087	10/16955	3.52e-05	0.003441	0.002848	Rpl5/Rpl23/Rps7	3
EC.upregulated	EC	upregulated	GO:0006457	protein folding	0.0608696	148/16955	6.68e-05	0.006266	0.005186	Ppia/Hspa8/Hspd1/Hsp90ab1/Hsp90aa1/Hspa9/B2m	7
EC.upregulated	EC	upregulated	GO:0071230	cellular response to amino acid stimulus	0.0434783	66/16955	8.45e-05	0.00762	0.006307	Col1a1/Col3a1/Col1a2/Mmp2/Col6a1	5
EC.upregulated	EC	upregulated	GO:0006958	complement activation, classical pathway	0.0347826	35/16955	8.94e-05	0.007761	0.006423	Serping1/C3/C1qc/C1qa	4
EC.upregulated	EC	upregulated	GO:0016049	cell growth	0.104348	482/16955	0.000106	0.008842	0.007318	Postn/Gas1/Igfbp5/Apoe/Hsp90ab1/Lrp1/Hsp90aa1/Rpl4/Igfbp4/Myl2/Cd81/Gja1	12
EC.upregulated	EC	upregulated	GO:1901796	regulation of signal transduction by p53 class mediator	0.0434783	70/16955	0.000112	0.009055	0.007495	Ankrd1/Ubb/Rpl5/Rpl23/Rps7	5
EC.upregulated	EC	upregulated	GO:0031647	regulation of protein stability	0.0782609	281/16955	0.000126	0.009846	0.008149	Hspa8/Hspd1/Hsp90ab1/Hsp90aa1/Rpl5/Rpl23/Gapdh/Cd81/Rps7	9
EC.upregulated	EC	upregulated	GO:0034470	ncRNA processing	0.0869565	350/16955	0.000135	0.01	0.008277	Rps21/Rpl5/Rps24/Rps17/Rps7/Rps16/Rpl10a/Rps8/Rpl27/Rpl14	10
EC.upregulated	EC	upregulated	GO:0045861	negative regulation of proteolysis	0.0782609	284/16955	0.000137	0.01	0.008277	Serping1/Gas1/Hsp90ab1/Timp2/Rpl5/Rpl23/Gapdh/Herpud1/Rps7	9
EC.upregulated	EC	upregulated	GO:0034660	ncRNA metabolic process	0.0956522	430/16955	0.000164	0.011415	0.009448	Rps21/Rpl5/Rps24/Rps17/Rps7/Rps16/Rpl10a/Rps8/Rpl27/Rpl14/Eprs	11
EC.upregulated	EC	upregulated	GO:0071229	cellular response to acid chemical	0.0434783	76/16955	0.000166	0.011415	0.009448	Col1a1/Col3a1/Col1a2/Mmp2/Col6a1	5
EC.upregulated	EC	upregulated	GO:0050821	protein stabilization	0.0608696	174/16955	0.000184	0.012292	0.010173	Hspd1/Hsp90ab1/Hsp90aa1/Rpl5/Rpl23/Gapdh/Rps7	7
EC.upregulated	EC	upregulated	GO:0016064	immunoglobulin mediated immune response	0.0521739	123/16955	0.00019	0.012401	0.010264	Serping1/Hspd1/C3/C1qc/Cd81/C1qa	6
EC.upregulated	EC	upregulated	GO:0043200	response to amino acid	0.0434783	80/16955	0.000211	0.013165	0.010896	Col1a1/Col3a1/Col1a2/Mmp2/Col6a1	5
EC.upregulated	EC	upregulated	GO:0019724	B cell mediated immunity	0.0521739	126/16955	0.000217	0.013165	0.010896	Serping1/Hspd1/C3/C1qc/Cd81/C1qa	6
EC.upregulated	EC	upregulated	GO:0003254	regulation of membrane depolarization	0.0347826	44/16955	0.000221	0.013165	0.010896	Dcn/B2m/Gja1/Got1	4
EC.upregulated	EC	upregulated	GO:0051131	chaperone-mediated protein complex assembly	0.026087	18/16955	0.00023	0.013165	0.010896	Hsp90ab1/Hsp90aa1/Lonp1	3
EC.upregulated	EC	upregulated	GO:0051444	negative regulation of ubiquitin-protein transferase activity	0.026087	18/16955	0.00023	0.013165	0.010896	Rpl5/Rpl23/Rps7	3
EC.upregulated	EC	upregulated	GO:0034248	regulation of cellular amide metabolic process	0.0869565	377/16955	0.000246	0.013738	0.01137	Vim/Igfbp5/Apoe/Rpl5/Gapdh/Rps3a1/Rps3/Eef2/Rpl13a/Eprs	10
EC.upregulated	EC	upregulated	GO:0150146	cell junction disassembly	0.026087	19/16955	0.000272	0.014833	0.012277	C3/C1qc/C1qa	3
EC.upregulated	EC	upregulated	GO:1900746	regulation of vascular endothelial growth factor signaling pathway	0.026087	20/16955	0.000319	0.01697	0.014045	Dcn/Smoc2/Cd63	3
EC.upregulated	EC	upregulated	GO:2000059	negative regulation of ubiquitin-dependent protein catabolic process	0.0347826	49/16955	0.000336	0.017516	0.014497	Hsp90ab1/Rpl5/Rpl23/Rps7	4
EC.upregulated	EC	upregulated	GO:0002711	positive regulation of T cell mediated immunity	0.0347826	50/16955	0.000364	0.018497	0.015309	Hspa8/Hspd1/B2m/Cd81	4
EC.upregulated	EC	upregulated	GO:0006417	regulation of translation	0.0782609	325/16955	0.000371	0.018497	0.015309	Vim/Igfbp5/Rpl5/Gapdh/Rps3a1/Rps3/Eef2/Rpl13a/Eprs	9
EC.upregulated	EC	upregulated	GO:0002449	lymphocyte mediated immunity	0.0695652	260/16955	0.000395	0.019298	0.015972	Serping1/Hspa8/Hspd1/C3/B2m/C1qc/Cd81/C1qa	8
EC.upregulated	EC	upregulated	GO:1902547	regulation of cellular response to vascular endothelial growth factor stimulus	0.026087	22/16955	0.000426	0.019975	0.016532	Dcn/Smoc2/Cd63	3
EC.upregulated	EC	upregulated	GO:1904666	regulation of ubiquitin protein ligase activity	0.026087	22/16955	0.000426	0.019975	0.016532	Rpl5/Rpl23/Rps7	3
EC.upregulated	EC	upregulated	GO:0034249	negative regulation of cellular amide metabolic process	0.0521739	144/16955	0.000445	0.020353	0.016845	Igfbp5/Apoe/Gapdh/Rps3/Rpl13a/Eprs	6
EC.upregulated	EC	upregulated	GO:0031396	regulation of protein ubiquitination	0.0608696	202/16955	0.000454	0.020353	0.016845	Hsp90ab1/Hsp90aa1/Rpl5/Rpl23/Herpud1/Rps7/Rps3	7
EC.upregulated	EC	upregulated	GO:0010810	regulation of cell-substrate adhesion	0.0608696	203/16955	0.000468	0.020353	0.016845	Col1a1/Postn/Ccdc80/Lrp1/Fbln2/Smoc2/Fbln1	7
EC.upregulated	EC	upregulated	GO:0001101	response to acid chemical	0.0434783	95/16955	0.000469	0.020353	0.016845	Col1a1/Col3a1/Col1a2/Mmp2/Col6a1	5
EC.upregulated	EC	upregulated	GO:0018149	peptide cross-linking	0.026087	23/16955	0.000488	0.020469	0.016941	Dcn/Col3a1/Bgn	3
EC.upregulated	EC	upregulated	GO:0006956	complement activation	0.0347826	54/16955	0.000489	0.020469	0.016941	Serping1/C3/C1qc/C1qa	4
EC.upregulated	EC	upregulated	GO:0045785	positive regulation of cell adhesion	0.0869565	413/16955	0.000505	0.020786	0.017203	Ccdc80/Hspd1/Hsp90aa1/Fbln2/Smoc2/Cd63/Fbln1/Cd81/Rps3/Zbtb16	10
EC.upregulated	EC	upregulated	GO:0032964	collagen biosynthetic process	0.0347826	56/16955	0.000562	0.022715	0.0188	Vim/Ccn2/Col1a1/Got1	4
EC.upregulated	EC	upregulated	GO:0002460	adaptive immune response based on somatic recombination of immune receptors built from immunoglobulin superfamily domains	0.0695652	275/16955	0.000573	0.02275	0.018829	Serping1/Hspa8/Hspd1/C3/B2m/C1qc/Cd81/C1qa	8
EC.upregulated	EC	upregulated	GO:2000146	negative regulation of cell motility	0.0695652	277/16955	0.000601	0.023003	0.019039	Dcn/Col3a1/Igfbp5/Apoe/Lrp1/Cd63/Fbln1/Gja1	8
EC.upregulated	EC	upregulated	GO:0044403	symbiotic process	0.0782609	348/16955	0.000608	0.023003	0.019039	Ppia/Apoe/Hspa8/Hspd1/Hsp90ab1/Gapdh/Fbln1/Ifitm3/Ctsb	9
EC.upregulated	EC	upregulated	GO:0060537	muscle tissue development	0.0869565	423/16955	0.000608	0.023003	0.019039	Ankrd1/Col3a1/Acta1/Tenm4/Igfbp5/Tsc22d3/Myl3/Pln/Myl2/Gja1	10
EC.upregulated	EC	upregulated	GO:0010812	negative regulation of cell-substrate adhesion	0.0347826	58/16955	0.000643	0.023907	0.019786	Col1a1/Postn/Lrp1/Fbln1	4
EC.upregulated	EC	upregulated	GO:1903050	regulation of proteolysis involved in cellular protein catabolic process	0.0608696	216/16955	0.000677	0.024785	0.020513	Apoe/Hsp90ab1/Ubb/Rpl5/Rpl23/Herpud1/Rps7	7
EC.upregulated	EC	upregulated	GO:0002708	positive regulation of lymphocyte mediated immunity	0.0434783	108/16955	0.000841	0.030266	0.025049	Hspa8/Hspd1/C3/B2m/Cd81	5
EC.upregulated	EC	upregulated	GO:0009611	response to wounding	0.0869565	442/16955	0.000852	0.030266	0.025049	Col1a1/Serping1/Col3a1/Mmp2/Apoe/Lrp1/Smoc2/C3/Fbln1/Gja1	10
EC.upregulated	EC	upregulated	GO:0071897	DNA biosynthetic process	0.0521739	164/16955	0.000882	0.030867	0.025547	Ankrd1/Ccn2/Hsp90ab1/Hsp90aa1/Smoc2/Gja1	6
EC.upregulated	EC	upregulated	GO:0006898	receptor-mediated endocytosis	0.0608696	228/16955	0.000929	0.032038	0.026516	Apoe/Lrp1/C3/B2m/Cd63/Cd81/Ifitm3	7
EC.upregulated	EC	upregulated	GO:0002026	regulation of the force of heart contraction	0.026087	29/16955	0.000977	0.033178	0.02746	Myl3/Pln/Myl2	3
EC.upregulated	EC	upregulated	GO:0002824	positive regulation of adaptive immune response based on somatic recombination of immune receptors built from immunoglobulin superfamily domains	0.0434783	112/16955	0.000991	0.033187	0.027467	Hspa8/Hspd1/C3/B2m/Cd81	5
EC.upregulated	EC	upregulated	GO:0006986	response to unfolded protein	0.0434783	114/16955	0.001073	0.035423	0.029318	Hspa8/Hspd1/Hsp90aa1/Hspa9/Herpud1	5
EC.upregulated	EC	upregulated	GO:1903320	regulation of protein modification by small protein conjugation or removal	0.0608696	235/16955	0.001108	0.035826	0.029651	Hsp90ab1/Hsp90aa1/Rpl5/Rpl23/Herpud1/Rps7/Rps3	7
EC.upregulated	EC	upregulated	GO:0007565	female pregnancy	0.0434783	115/16955	0.001116	0.035826	0.029651	Igfbp5/Mmp2/Ctsl/Gja1/Ctsb	5
EC.upregulated	EC	upregulated	GO:0008015	blood circulation	0.0869565	460/16955	0.001152	0.036247	0.03	Ccn2/Postn/Col1a2/Mmp2/Apoe/Rarres2/Myl3/Pln/Myl2/Gja1	10
EC.upregulated	EC	upregulated	GO:2000278	regulation of DNA biosynthetic process	0.0434783	116/16955	0.00116	0.036247	0.03	Ankrd1/Hsp90ab1/Hsp90aa1/Smoc2/Gja1	5
EC.upregulated	EC	upregulated	GO:0030574	collagen catabolic process	0.026087	31/16955	0.00119	0.036412	0.030136	Mmp2/Ctsl/Ctsb	3
EC.upregulated	EC	upregulated	GO:0045807	positive regulation of endocytosis	0.0434783	117/16955	0.001205	0.036412	0.030136	Apoe/Lrp1/C3/B2m/Cd63	5
EC.upregulated	EC	upregulated	GO:0040013	negative regulation of locomotion	0.0695652	309/16955	0.001217	0.036412	0.030136	Dcn/Col3a1/Igfbp5/Apoe/Lrp1/Cd63/Fbln1/Gja1	8
EC.upregulated	EC	upregulated	GO:1903051	negative regulation of proteolysis involved in cellular protein catabolic process	0.0347826	69/16955	0.001237	0.036412	0.030136	Hsp90ab1/Rpl5/Rpl23/Rps7	4
EC.upregulated	EC	upregulated	GO:0051271	negative regulation of cellular component movement	0.0695652	310/16955	0.001243	0.036412	0.030136	Dcn/Col3a1/Igfbp5/Apoe/Lrp1/Cd63/Fbln1/Gja1	8
EC.upregulated	EC	upregulated	GO:0002821	positive regulation of adaptive immune response	0.0434783	119/16955	0.0013	0.037609	0.031127	Hspa8/Hspd1/C3/B2m/Cd81	5
EC.upregulated	EC	upregulated	GO:0050778	positive regulation of immune response	0.0869565	470/16955	0.001353	0.03838	0.031765	Serping1/Mmp2/Hspa8/Hspd1/C3/B2m/C1qc/Cd81/Rps3/C1qa	10
EC.upregulated	EC	upregulated	GO:0019730	antimicrobial humoral response	0.0347826	71/16955	0.001375	0.03838	0.031765	Rarres2/B2m/Rpl39/Gapdh	4
EC.upregulated	EC	upregulated	GO:0050830	defense response to Gram-positive bacterium	0.0347826	71/16955	0.001375	0.03838	0.031765	Lyz2/Rarres2/B2m/Rpl39	4
EC.upregulated	EC	upregulated	GO:0071260	cellular response to mechanical stimulus	0.026087	33/16955	0.00143	0.03943	0.032634	Ankrd1/Col1a1/Got1	3
EC.upregulated	EC	upregulated	GO:0002709	regulation of T cell mediated immunity	0.0347826	73/16955	0.001525	0.041549	0.034388	Hspa8/Hspd1/B2m/Cd81	4
EC.upregulated	EC	upregulated	GO:0003013	circulatory system process	0.0869565	479/16955	0.001558	0.041549	0.034388	Ccn2/Postn/Col1a2/Mmp2/Apoe/Rarres2/Myl3/Pln/Myl2/Gja1	10
EC.upregulated	EC	upregulated	GO:0042177	negative regulation of protein catabolic process	0.0434783	124/16955	0.00156	0.041549	0.034388	Hsp90ab1/Timp2/Rpl5/Rpl23/Rps7	5
EC.upregulated	EC	upregulated	GO:0042060	wound healing	0.0695652	322/16955	0.00158	0.041623	0.034449	Col1a1/Serping1/Col3a1/Apoe/Smoc2/C3/Fbln1/Gja1	8
EC.upregulated	EC	upregulated	GO:1990138	neuron projection extension	0.0521739	185/16955	0.001638	0.041885	0.034666	Postn/Apoe/Hsp90ab1/Lrp1/Hsp90aa1/Rpl4	6
EC.upregulated	EC	upregulated	GO:0017148	negative regulation of translation	0.0434783	126/16955	0.001674	0.041885	0.034666	Igfbp5/Gapdh/Rps3/Rpl13a/Eprs	5
EC.upregulated	EC	upregulated	GO:0060415	muscle tissue morphogenesis	0.0347826	75/16955	0.001685	0.041885	0.034666	Ankrd1/Col3a1/Myl3/Myl2	4
EC.upregulated	EC	upregulated	GO:0000462	maturation of SSU-rRNA from tricistronic rRNA transcript (SSU-rRNA, 5.8S rRNA, LSU-rRNA)	0.026087	35/16955	0.001698	0.041885	0.034666	Rps21/Rps16/Rps8	3
EC.upregulated	EC	upregulated	GO:0014002	astrocyte development	0.026087	35/16955	0.001698	0.041885	0.034666	Vim/Lrp1/C1qa	3
EC.upregulated	EC	upregulated	GO:0097242	amyloid-beta clearance	0.026087	35/16955	0.001698	0.041885	0.034666	Apoe/Lrp1/C3	3
EC.upregulated	EC	upregulated	GO:0034341	response to interferon-gamma	0.0434783	127/16955	0.001733	0.041885	0.034666	Vim/Gapdh/Ifitm3/Rpl13a/Eprs	5
EC.upregulated	EC	upregulated	GO:0048675	axon extension	0.0434783	127/16955	0.001733	0.041885	0.034666	Apoe/Hsp90ab1/Lrp1/Hsp90aa1/Rpl4	5
EC.upregulated	EC	upregulated	GO:0031397	negative regulation of protein ubiquitination	0.0347826	76/16955	0.00177	0.042231	0.034952	Rpl5/Rpl23/Rps7/Rps3	4
EC.upregulated	EC	upregulated	GO:0001558	regulation of cell growth	0.0782609	406/16955	0.001784	0.042231	0.034952	Gas1/Igfbp5/Apoe/Lrp1/Rpl4/Igfbp4/Myl2/Cd81/Gja1	9
EC.upregulated	EC	upregulated	GO:0051222	positive regulation of protein transport	0.0695652	330/16955	0.001843	0.042673	0.035318	Ankrd1/Ppia/Hsp90ab1/Lrp1/Hsp90aa1/Gapdh/Cd81/Gja1	8
EC.upregulated	EC	upregulated	GO:1904707	positive regulation of vascular associated smooth muscle cell proliferation	0.026087	36/16955	0.001844	0.042673	0.035318	Igfbp5/Mmp2/Gja1	3
EC.upregulated	EC	upregulated	GO:0045638	negative regulation of myeloid cell differentiation	0.0347826	77/16955	0.001857	0.042673	0.035318	Hspa9/C1qc/Nme2/Zbtb16	4
EC.upregulated	EC	upregulated	GO:0001819	positive regulation of cytokine production	0.0782609	409/16955	0.001875	0.042676	0.035321	Postn/Hspd1/Lrp1/Lum/C3/B2m/Gapdh/Cd81/Rps3	9
EC.upregulated	EC	upregulated	GO:0051702	interaction with symbiont	0.0347826	78/16955	0.001947	0.042987	0.035578	Apoe/Hspa8/Hspd1/Gapdh	4
EC.upregulated	EC	upregulated	GO:0050673	epithelial cell proliferation	0.0782609	412/16955	0.001971	0.042987	0.035578	Gas1/Igfbp5/Apoe/Ctsl/Ccnd2/Igfbp4/B2m/Gja1/Nme2	9
EC.upregulated	EC	upregulated	GO:0060346	bone trabecula formation	0.0173913	10/16955	0.001981	0.042987	0.035578	Col1a1/Mmp2	2
EC.upregulated	EC	upregulated	GO:0097278	complement-dependent cytotoxicity	0.0173913	10/16955	0.001981	0.042987	0.035578	Hsp90ab1/C3	2
EC.upregulated	EC	upregulated	GO:1902947	regulation of tau-protein kinase activity	0.0173913	10/16955	0.001981	0.042987	0.035578	Apoe/Hsp90aa1	2
EC.upregulated	EC	upregulated	GO:0048708	astrocyte differentiation	0.0347826	79/16955	0.00204	0.043879	0.036316	Vim/Lrp1/Atf5/C1qa	4
EC.upregulated	EC	upregulated	GO:0072331	signal transduction by p53 class mediator	0.0434783	133/16955	0.002122	0.044323	0.036684	Ankrd1/Ubb/Rpl5/Rpl23/Rps7	5
EC.upregulated	EC	upregulated	GO:0051817	modulation of process of other organism involved in symbiotic interaction	0.0347826	80/16955	0.002137	0.044323	0.036684	Apoe/Hspa8/Gapdh/Fbln1	4
EC.upregulated	EC	upregulated	GO:0051899	membrane depolarization	0.0347826	80/16955	0.002137	0.044323	0.036684	Dcn/B2m/Gja1/Got1	4
EC.upregulated	EC	upregulated	GO:1903363	negative regulation of cellular protein catabolic process	0.0347826	80/16955	0.002137	0.044323	0.036684	Hsp90ab1/Rpl5/Rpl23/Rps7	4
EC.upregulated	EC	upregulated	GO:0038084	vascular endothelial growth factor signaling pathway	0.026087	38/16955	0.002157	0.044353	0.036708	Dcn/Smoc2/Cd63	3
EC.upregulated	EC	upregulated	GO:0030336	negative regulation of cell migration	0.0608696	265/16955	0.002199	0.04483	0.037104	Dcn/Col3a1/Igfbp5/Apoe/Lrp1/Cd63/Gja1	7
EC.upregulated	EC	upregulated	GO:0048644	muscle organ morphogenesis	0.0347826	81/16955	0.002236	0.045185	0.037397	Ankrd1/Col3a1/Myl3/Myl2	4
EC.upregulated	EC	upregulated	GO:0002443	leukocyte mediated immunity	0.0695652	342/16955	0.002301	0.046106	0.03816	Serping1/Hspa8/Hspd1/C3/B2m/C1qc/Cd81/C1qa	8
EC.upregulated	EC	upregulated	GO:1905710	positive regulation of membrane permeability	0.026087	39/16955	0.002325	0.046192	0.038231	Hspa8/Chchd10/Slc25a5	3
EC.upregulated	EC	upregulated	GO:0010232	vascular transport	0.0173913	11/16955	0.00241	0.046538	0.038517	Apoe/Gja1	2
EC.upregulated	EC	upregulated	GO:0099558	maintenance of synapse structure	0.0173913	11/16955	0.00241	0.046538	0.038517	Hspa8/Chchd10	2
EC.upregulated	EC	upregulated	GO:0035966	response to topologically incorrect protein	0.0434783	137/16955	0.002414	0.046538	0.038517	Hspa8/Hspd1/Hsp90aa1/Hspa9/Herpud1	5
EC.upregulated	EC	upregulated	GO:0071560	cellular response to transforming growth factor beta stimulus	0.0521739	200/16955	0.002425	0.046538	0.038517	Ankrd1/Col3a1/Col1a2/Hsp90ab1/Ltbp4/Got1	6
EC.upregulated	EC	upregulated	GO:1904951	positive regulation of establishment of protein localization	0.0695652	346/16955	0.002473	0.046538	0.038517	Ankrd1/Ppia/Hsp90ab1/Lrp1/Hsp90aa1/Gapdh/Cd81/Gja1	8
EC.upregulated	EC	upregulated	GO:0007160	cell-matrix adhesion	0.0521739	201/16955	0.002487	0.046538	0.038517	Ccn2/Postn/Col3a1/Lrp1/Tnxb/Cd63	6
EC.upregulated	EC	upregulated	GO:0043903	regulation of symbiotic process	0.0521739	201/16955	0.002487	0.046538	0.038517	Ppia/Apoe/Hspa8/Gapdh/Fbln1/Ifitm3	6
EC.upregulated	EC	upregulated	GO:1904645	response to amyloid-beta	0.026087	40/16955	0.002502	0.046538	0.038517	Mmp2/Lrp1/Gja1	3
EC.upregulated	EC	upregulated	GO:0044706	multi-multicellular organism process	0.0434783	140/16955	0.002652	0.048636	0.040253	Igfbp5/Mmp2/Ctsl/Gja1/Ctsb	5
EC.upregulated	EC	upregulated	GO:0034620	cellular response to unfolded protein	0.0347826	85/16955	0.002666	0.048636	0.040253	Hspa8/Hspd1/Hspa9/Herpud1	4
EC.upregulated	EC	upregulated	GO:0071559	response to transforming growth factor beta	0.0521739	204/16955	0.002677	0.048636	0.040253	Ankrd1/Col3a1/Col1a2/Hsp90ab1/Ltbp4/Got1	6
EC.upregulated	EC	upregulated	GO:0021954	central nervous system neuron development	0.0347826	86/16955	0.002781	0.049516	0.040982	Hsp90ab1/Ubb/Hsp90aa1/Atf5	4
EC.upregulated	EC	upregulated	GO:1903321	negative regulation of protein modification by small protein conjugation or removal	0.0347826	86/16955	0.002781	0.049516	0.040982	Rpl5/Rpl23/Rps7/Rps3	4
EC.upregulated	EC	upregulated	GO:1901653	cellular response to peptide	0.0608696	277/16955	0.002817	0.049516	0.040982	Vim/Gdf15/Lrp1/Rarres2/Rpl23/Gja1/Eprs	7
EC.upregulated	EC	upregulated	GO:0050680	negative regulation of epithelial cell proliferation	0.0434783	142/16955	0.00282	0.049516	0.040982	Gas1/Apoe/Ctsl/B2m/Gja1	5
EC.upregulated	EC	upregulated	GO:0019058	viral life cycle	0.0521739	207/16955	0.002877	0.049516	0.040982	Ppia/Apoe/Hspa8/Hsp90ab1/Ifitm3/Ctsb	6
EC.upregulated	EC	upregulated	GO:1900025	negative regulation of substrate adhesion-dependent cell spreading	0.0173913	12/16955	0.002879	0.049516	0.040982	Postn/Fbln1	2
EC.upregulated	EC	upregulated	GO:2000343	positive regulation of chemokine (C-X-C motif) ligand 2 production	0.0173913	12/16955	0.002879	0.049516	0.040982	Postn/Lrp1	2
EC.upregulated	EC	upregulated	GO:0001503	ossification	0.0695652	355/16955	0.002894	0.049516	0.040982	Ccn2/Col1a1/Mgp/Col1a2/Igfbp5/Mmp2/Gja1/Zbtb16	8
FB.downregulated	FB	downregulated	GO:0045599	negative regulation of fat cell differentiation	0.0684932	50/16955	2.35e-06	0.003632	0.003139	Arntl/Rora/Zfpm2/Runx1t1/Smad3	5
FB.downregulated	FB	downregulated	GO:0045598	regulation of fat cell differentiation	0.0821918	136/16955	2.61e-05	0.015949	0.013785	Arntl/Rora/Zfpm2/Runx1t1/Smad3/Medag	6
FB.downregulated	FB	downregulated	GO:0030111	regulation of Wnt signaling pathway	0.109589	286/16955	3.09e-05	0.015949	0.013785	Arntl/Bicc1/Eda/Egfr/Rbms3/Zeb2/Wwox/Smad3	8
FB.downregulated	FB	downregulated	GO:0045444	fat cell differentiation	0.0958904	238/16955	7.29e-05	0.028205	0.024376	Arntl/Ebf2/Rora/Zfpm2/Runx1t1/Smad3/Medag	7
FB.downregulated	FB	downregulated	GO:0051893	regulation of focal adhesion assembly	0.0547945	58/16955	0.000113	0.029035	0.025094	Arhgap6/Dlc1/Smad3/Tek	4
FB.downregulated	FB	downregulated	GO:0090109	regulation of cell-substrate junction assembly	0.0547945	58/16955	0.000113	0.029035	0.025094	Arhgap6/Dlc1/Smad3/Tek	4
FB.downregulated	FB	downregulated	GO:0150116	regulation of cell-substrate junction organization	0.0547945	61/16955	0.000137	0.030315	0.0262	Arhgap6/Dlc1/Smad3/Tek	4
FB.downregulated	FB	downregulated	GO:0007160	cell-matrix adhesion	0.0821918	201/16955	0.000227	0.038069	0.032902	Adamts12/Arhgap6/Dlc1/Eda/Smad3/Tek	6
FB.downregulated	FB	downregulated	GO:0030177	positive regulation of Wnt signaling pathway	0.0684932	131/16955	0.000252	0.038069	0.032902	Arntl/Eda/Egfr/Zeb2/Smad3	5
FB.downregulated	FB	downregulated	GO:0016055	Wnt signaling pathway	0.109589	389/16955	0.000261	0.038069	0.032902	Arntl/Bicc1/Eda/Egfr/Rbms3/Zeb2/Wwox/Smad3	8
FB.downregulated	FB	downregulated	GO:0198738	cell-cell signaling by wnt	0.109589	391/16955	0.000271	0.038069	0.032902	Arntl/Bicc1/Eda/Egfr/Rbms3/Zeb2/Wwox/Smad3	8
FB.downregulated	FB	downregulated	GO:0043010	camera-type eye development	0.0958904	304/16955	0.000329	0.042225	0.036494	Egfr/Rhoj/Tenm3/Zeb1/Zeb2/Smad3/Sdk1	7
FB.downregulated	FB	downregulated	GO:0048041	focal adhesion assembly	0.0547945	78/16955	0.000355	0.042225	0.036494	Arhgap6/Dlc1/Smad3/Tek	4
FB.downregulated	FB	downregulated	GO:0060828	regulation of canonical Wnt signaling pathway	0.0821918	223/16955	0.000395	0.043713	0.03778	Arntl/Bicc1/Eda/Egfr/Rbms3/Smad3	6
FB.upregulated	FB	upregulated	GO:0002181	cytoplasmic translation	0.111111	86/16955	7.12e-35	2.34e-31	2e-31	Rpl11/Rpl13a/Rpl15/Rpl17/Rpl18/Rpl18a/Rpl19/Rpl24/Rpl26/Rpl30/Rpl31/Rpl35a/Rpl36/Rpl38/Rpl39/Rpl6/Rpl8/Rpl9/Rplp0/Rplp1/Rps2/Rps21/Rps23/Rps26/Rps28/Rps29/Rpsa/Eef2/Rpl22/Rpl10a/Eif2s2/Rbm24	32
FB.upregulated	FB	upregulated	GO:0042255	ribosome assembly	0.0729167	63/16955	4.76e-22	7.81e-19	6.67e-19	Rpl10/Rpl11/Rpl12/Rpl23a/Rpl24/Rpl3/Rpl38/Rpl5/Rpl6/Rplp0/Rps10/Rps14/Rps15/Rps19/Rps2/Rps25/Rps27/Rps28/Rps5/Rpsa/Rps27l	21
FB.upregulated	FB	upregulated	GO:0042254	ribosome biogenesis	0.125	289/16955	5.35e-21	5.85e-18	5e-18	Rpl10/Rpl11/Rpl12/Rpl23a/Rpl24/Rpl26/Rpl27/Rpl3/Rpl35/Rpl35a/Rpl38/Rpl5/Rpl6/Rpl7/Rpl7a/Rplp0/Rps10/Rps14/Rps15/Rps16/Rps17/Rps19/Rps2/Rps21/Rps24/Rps25/Rps27/Rps28/Rps5/Rps6/Rps7/Rps8/Rpsa/Rpl14/Rpl10a/Rps27l	36
FB.upregulated	FB	upregulated	GO:0022613	ribonucleoprotein complex biogenesis	0.138889	402/16955	1.23e-19	1.01e-16	8.64e-17	Hsp90aa1/Hsp90ab1/Rpl10/Rpl11/Rpl12/Rpl13a/Rpl23a/Rpl24/Rpl26/Rpl27/Rpl3/Rpl35/Rpl35a/Rpl38/Rpl5/Rpl6/Rpl7/Rpl7a/Rplp0/Rps10/Rps14/Rps15/Rps16/Rps17/Rps19/Rps2/Rps21/Rps24/Rps25/Rps27/Rps28/Rps5/Rps6/Rps7/Rps8/Rpsa/Rpl14/Rpl10a/Eif2s2/Rps27l	40
FB.upregulated	FB	upregulated	GO:0042274	ribosomal small subunit biogenesis	0.0659722	72/16955	6.82e-18	4.47e-15	3.82e-15	Rpl38/Rps10/Rps14/Rps15/Rps16/Rps17/Rps19/Rps2/Rps21/Rps24/Rps25/Rps27/Rps28/Rps5/Rps6/Rps7/Rps8/Rpsa/Rps27l	19
FB.upregulated	FB	upregulated	GO:0000028	ribosomal small subunit assembly	0.0416667	20/16955	5.12e-17	2.8e-14	2.4e-14	Rpl38/Rps10/Rps14/Rps15/Rps19/Rps2/Rps25/Rps27/Rps28/Rps5/Rpsa/Rps27l	12
FB.upregulated	FB	upregulated	GO:0022618	ribonucleoprotein complex assembly	0.0868056	169/16955	1.11e-16	5.21e-14	4.46e-14	Hsp90aa1/Hsp90ab1/Rpl10/Rpl11/Rpl12/Rpl13a/Rpl23a/Rpl24/Rpl3/Rpl38/Rpl5/Rpl6/Rplp0/Rps10/Rps14/Rps15/Rps19/Rps2/Rps25/Rps27/Rps28/Rps5/Rpsa/Eif2s2/Rps27l	25
FB.upregulated	FB	upregulated	GO:0046034	ATP metabolic process	0.0972222	226/16955	1.76e-16	7.24e-14	6.19e-14	Aldoa/Atp5a1/Atp5b/Atp5g1/Atp5g3/Atp5l/Chchd10/Cox4i1/Cox6a2/Cox7c/Gapdh/Hspa8/Myh6/Ndufb9/Uqcrb/Uqcrq/Cox5a/Atp5j2/Atp5e/Cox7a2/Atp5k/Uqcrh/Cyc1/Uqcr10/Atp5d/Atp1b1/Cox6a1/Tpi1	28
FB.upregulated	FB	upregulated	GO:0071826	ribonucleoprotein complex subunit organization	0.0868056	176/16955	2.98e-16	1.09e-13	9.3e-14	Hsp90aa1/Hsp90ab1/Rpl10/Rpl11/Rpl12/Rpl13a/Rpl23a/Rpl24/Rpl3/Rpl38/Rpl5/Rpl6/Rplp0/Rps10/Rps14/Rps15/Rps19/Rps2/Rps25/Rps27/Rps28/Rps5/Rpsa/Eif2s2/Rps27l	25
FB.upregulated	FB	upregulated	GO:0042273	ribosomal large subunit biogenesis	0.0590278	71/16955	2.31e-15	7.59e-13	6.49e-13	Rpl10/Rpl11/Rpl12/Rpl23a/Rpl24/Rpl26/Rpl3/Rpl35/Rpl35a/Rpl38/Rpl5/Rpl6/Rpl7/Rpl7a/Rplp0/Rpl14/Rpl10a	17
FB.upregulated	FB	upregulated	GO:0006941	striated muscle contraction	0.0763889	156/16955	2.24e-14	6.3e-12	5.38e-12	Actc1/Aldoa/Myh6/Myl2/Myl3/Pln/Tnnc1/Tnnt2/Ttn/Mybpc3/Csrp3/Atp1a1/Nppa/Ccn2/Atp1b1/Tcap/Fxyd1/Akap6/Ryr2/Dmd/Dmpk/Cacna1c	22
FB.upregulated	FB	upregulated	GO:0006119	oxidative phosphorylation	0.0625	94/16955	2.3e-14	6.3e-12	5.38e-12	Atp5a1/Atp5b/Atp5l/Chchd10/Cox4i1/Cox6a2/Cox7c/Ndufb9/Uqcrb/Uqcrq/Cox5a/Atp5j2/Cox7a2/Uqcrh/Cyc1/Uqcr10/Atp5d/Cox6a1	18
FB.upregulated	FB	upregulated	GO:0060048	cardiac muscle contraction	0.0694444	124/16955	2.55e-14	6.43e-12	5.49e-12	Actc1/Myh6/Myl2/Myl3/Pln/Tnnc1/Tnnt2/Ttn/Mybpc3/Csrp3/Atp1a1/Nppa/Ccn2/Atp1b1/Tcap/Fxyd1/Akap6/Ryr2/Dmd/Cacna1c	20
FB.upregulated	FB	upregulated	GO:0006936	muscle contraction	0.0972222	276/16955	3.11e-14	7.28e-12	6.22e-12	Actc1/Aldoa/Myh6/Myl2/Myl3/Pln/Tnnc1/Tnnt2/Ttn/Mybpc3/Myl6/Lmod2/Csrp3/Atp1a1/Nppa/Ccn2/Atp1b1/Sod1/Tcap/Actn2/Fxyd1/Akap6/Ryr2/Dmd/Dmpk/Acta2/Myom1/Cacna1c	28
FB.upregulated	FB	upregulated	GO:0015985	energy coupled proton transport, down electrochemical gradient	0.0347222	20/16955	2.72e-13	5.58e-11	4.77e-11	Atp5a1/Atp5b/Atp5g1/Atp5g3/Atp5l/Atp5j2/Atp5e/Atp5k/Cyc1/Atp5d	10
FB.upregulated	FB	upregulated	GO:0015986	ATP synthesis coupled proton transport	0.0347222	20/16955	2.72e-13	5.58e-11	4.77e-11	Atp5a1/Atp5b/Atp5g1/Atp5g3/Atp5l/Atp5j2/Atp5e/Atp5k/Cyc1/Atp5d	10
FB.upregulated	FB	upregulated	GO:0003012	muscle system process	0.107639	381/16955	4.98e-13	9.62e-11	8.22e-11	Actc1/Aldoa/Igfbp5/Myh6/Myl2/Myl3/Pln/Tnnc1/Tnnt2/Ttn/Mybpc3/Myl6/Lmod2/Csrp3/Atp1a1/Nppa/Nppb/Ccn2/Atp1b1/Sorbs2/Sod1/Tcap/Actn2/Fxyd1/Akap6/Ryr2/Dmd/Dmpk/Acta2/Myom1/Cacna1c	31
FB.upregulated	FB	upregulated	GO:0060047	heart contraction	0.0798611	208/16955	1.11e-12	2.02e-10	1.72e-10	Actc1/Gja1/Myh6/Myl2/Myl3/Pln/Tnnc1/Tnnt2/Ttn/Mybpc3/Csrp3/Atp1a1/Nppa/Ccn2/Atp1b1/Sod1/Tcap/Fxyd1/Akap6/Ryr2/Dmd/Dmpk/Cacna1c	23
FB.upregulated	FB	upregulated	GO:0003015	heart process	0.0798611	217/16955	2.7e-12	4.66e-10	3.99e-10	Actc1/Gja1/Myh6/Myl2/Myl3/Pln/Tnnc1/Tnnt2/Ttn/Mybpc3/Csrp3/Atp1a1/Nppa/Ccn2/Atp1b1/Sod1/Tcap/Fxyd1/Akap6/Ryr2/Dmd/Dmpk/Cacna1c	23
FB.upregulated	FB	upregulated	GO:0000027	ribosomal large subunit assembly	0.0347222	28/16955	1.71e-11	2.81e-09	2.4e-09	Rpl10/Rpl11/Rpl12/Rpl23a/Rpl24/Rpl3/Rpl38/Rpl5/Rpl6/Rplp0	10
FB.upregulated	FB	upregulated	GO:0006091	generation of precursor metabolites and energy	0.0972222	358/16955	1.83e-11	2.86e-09	2.45e-09	Aldoa/Atp5a1/Atp5b/Atp5l/Chchd10/Cox4i1/Cox6a2/Cox7c/Gapdh/Mdh1/Ndufb9/Uqcrb/Uqcrq/Cox5a/Atp5j2/Cox7a2/Uqcrh/Ndufa5/Mdh2/Aco2/Cyc1/Uqcr10/Atp5d/Igf2/Cox17/Cox6a1/Tpi1/Gyg	28
FB.upregulated	FB	upregulated	GO:0051146	striated muscle cell differentiation	0.0868056	293/16955	3.62e-11	5.4e-09	4.61e-09	Acta1/Actc1/Actg1/Cd81/Igfbp5/Myh6/Myl2/Tnnt2/Ttn/Mybpc3/Lmod2/Naca/Csrp3/Igf2/Sorbs2/Gdf15/Tcap/Actn2/Fhl2/Akap6/Rbm24/Dmd/Cdh2/Dmpk/Ldb3	25
FB.upregulated	FB	upregulated	GO:0006364	rRNA processing	0.0729167	203/16955	3.94e-11	5.63e-09	4.81e-09	Rpl11/Rpl26/Rpl27/Rpl35/Rpl35a/Rpl5/Rpl7/Rpl7a/Rps14/Rps15/Rps16/Rps17/Rps19/Rps21/Rps24/Rps28/Rps6/Rps7/Rps8/Rpl14/Rpl10a	21
FB.upregulated	FB	upregulated	GO:0042692	muscle cell differentiation	0.0972222	372/16955	4.52e-11	6.18e-09	5.28e-09	Acta1/Actc1/Actg1/Cd81/Igfbp5/Myh6/Myl2/Tmsb4x/Tnnt2/Ttn/Mybpc3/H3f3b/Lmod2/Naca/Csrp3/Igf2/Sorbs2/Gdf15/Tcap/Eif5a/Actn2/Fhl2/Akap6/Rbm24/Dmd/Cdh2/Dmpk/Ldb3	28
FB.upregulated	FB	upregulated	GO:0016072	rRNA metabolic process	0.0729167	211/16955	8.2e-11	1.02e-08	8.69e-09	Rpl11/Rpl26/Rpl27/Rpl35/Rpl35a/Rpl5/Rpl7/Rpl7a/Rps14/Rps15/Rps16/Rps17/Rps19/Rps21/Rps24/Rps28/Rps6/Rps7/Rps8/Rpl14/Rpl10a	21
FB.upregulated	FB	upregulated	GO:0030239	myofibril assembly	0.0451389	67/16955	8.36e-11	1.02e-08	8.69e-09	Acta1/Actc1/Actg1/Myh6/Myl2/Tnnt2/Ttn/Mybpc3/Lmod2/Csrp3/Tcap/Actn2/Ldb3	13
FB.upregulated	FB	upregulated	GO:0055008	cardiac muscle tissue morphogenesis	0.0451389	67/16955	8.36e-11	1.02e-08	8.69e-09	Actc1/Ankrd1/Myh6/Myl2/Myl3/Tnnc1/Tnnt2/Ttn/Xirp2/Mybpc3/Ly6e/Tcap/Ryr2	13
FB.upregulated	FB	upregulated	GO:0048738	cardiac muscle tissue development	0.0763889	239/16955	1.32e-10	1.55e-08	1.32e-08	Actc1/Ankrd1/Gja1/Myh6/Myl2/Myl3/Pln/Tnnc1/Tnnt2/Ttn/Xirp2/Mybpc3/Csrp3/Ly6e/Sorbs2/Tcap/Tenm4/Actn2/Fhl2/Akap6/Ryr2/Erbb4	22
FB.upregulated	FB	upregulated	GO:0060537	muscle tissue development	0.100694	423/16955	1.87e-10	2.11e-08	1.81e-08	Acta1/Actc1/Ankrd1/Gja1/Igfbp5/Myh6/Myl2/Myl3/Pln/Tnnc1/Tnnt2/Ttn/Xirp2/Mybpc3/Myl6/Naca/Csrp3/Ly6e/Sorbs2/Tcap/Tenm4/Actn2/Fhl2/Akap6/Ryr2/Rbm24/Dmd/Tsc22d3/Erbb4	29
FB.upregulated	FB	upregulated	GO:0009206	purine ribonucleoside triphosphate biosynthetic process	0.0416667	59/16955	2.52e-10	2.76e-08	2.36e-08	Aldoa/Atp5a1/Atp5b/Atp5g1/Atp5g3/Atp5l/Nme2/Atp5j2/Atp5e/Atp5k/Cyc1/Atp5d	12
FB.upregulated	FB	upregulated	GO:0014706	striated muscle tissue development	0.0972222	402/16955	2.73e-10	2.89e-08	2.47e-08	Acta1/Actc1/Ankrd1/Gja1/Myh6/Myl2/Myl3/Pln/Tnnc1/Tnnt2/Ttn/Xirp2/Mybpc3/Myl6/Naca/Csrp3/Ly6e/Sorbs2/Tcap/Tenm4/Actn2/Fhl2/Akap6/Ryr2/Rbm24/Dmd/Tsc22d3/Erbb4	28
FB.upregulated	FB	upregulated	GO:0009145	purine nucleoside triphosphate biosynthetic process	0.0416667	60/16955	3.11e-10	3.19e-08	2.72e-08	Aldoa/Atp5a1/Atp5b/Atp5g1/Atp5g3/Atp5l/Nme2/Atp5j2/Atp5e/Atp5k/Cyc1/Atp5d	12
FB.upregulated	FB	upregulated	GO:0060415	muscle tissue morphogenesis	0.0451389	75/16955	3.7e-10	3.68e-08	3.14e-08	Actc1/Ankrd1/Myh6/Myl2/Myl3/Tnnc1/Tnnt2/Ttn/Xirp2/Mybpc3/Ly6e/Tcap/Ryr2	13
FB.upregulated	FB	upregulated	GO:0006754	ATP biosynthetic process	0.0381944	49/16955	4.61e-10	4.36e-08	3.73e-08	Aldoa/Atp5a1/Atp5b/Atp5g1/Atp5g3/Atp5l/Atp5j2/Atp5e/Atp5k/Cyc1/Atp5d	11
FB.upregulated	FB	upregulated	GO:0009201	ribonucleoside triphosphate biosynthetic process	0.0416667	62/16955	4.65e-10	4.36e-08	3.73e-08	Aldoa/Atp5a1/Atp5b/Atp5g1/Atp5g3/Atp5l/Nme2/Atp5j2/Atp5e/Atp5k/Cyc1/Atp5d	12
FB.upregulated	FB	upregulated	GO:0008016	regulation of heart contraction	0.0625	171/16955	7.64e-10	6.95e-08	5.94e-08	Gja1/Myh6/Myl2/Myl3/Pln/Tnnt2/Mybpc3/Csrp3/Atp1a1/Nppa/Ccn2/Atp1b1/Fxyd1/Akap6/Ryr2/Dmd/Dmpk/Cacna1c	18
FB.upregulated	FB	upregulated	GO:0003013	circulatory system process	0.104167	479/16955	7.84e-10	6.95e-08	5.94e-08	Actc1/Apoe/Gja1/Myh6/Myl2/Myl3/Npr3/Pln/Tnnc1/Tnnt2/Ttn/Mybpc3/Rarres2/Fabp5/Postn/Csrp3/Atp1a1/Nppa/Nppb/Ccn2/Atp1b1/Sod1/Tcap/Fxyd1/Akap6/Ryr2/Dmd/Dmpk/Acta2/Cacna1c	30
FB.upregulated	FB	upregulated	GO:0042775	mitochondrial ATP synthesis coupled electron transport	0.0381944	52/16955	9.14e-10	7.89e-08	6.75e-08	Cox4i1/Cox6a2/Cox7c/Ndufb9/Uqcrb/Uqcrq/Cox5a/Uqcrh/Cyc1/Uqcr10/Cox6a1	11
FB.upregulated	FB	upregulated	GO:0009060	aerobic respiration	0.0416667	66/16955	9.98e-10	8.21e-08	7.02e-08	Cox4i1/Cox6a2/Cox7c/Mdh1/Uqcrb/Cox5a/Uqcrh/Mdh2/Aco2/Uqcr10/Atp5d/Cox6a1	12
FB.upregulated	FB	upregulated	GO:0048644	muscle organ morphogenesis	0.0451389	81/16955	1e-09	8.21e-08	7.02e-08	Actc1/Ankrd1/Myh6/Myl2/Myl3/Tnnc1/Tnnt2/Ttn/Xirp2/Mybpc3/Ly6e/Tcap/Ryr2	13
FB.upregulated	FB	upregulated	GO:0042773	ATP synthesis coupled electron transport	0.0381944	53/16955	1.14e-09	9.1e-08	7.77e-08	Cox4i1/Cox6a2/Cox7c/Ndufb9/Uqcrb/Uqcrq/Cox5a/Uqcrh/Cyc1/Uqcr10/Cox6a1	11
FB.upregulated	FB	upregulated	GO:0008015	blood circulation	0.100694	460/16955	1.32e-09	1.02e-07	8.74e-08	Actc1/Apoe/Gja1/Myh6/Myl2/Myl3/Npr3/Pln/Tnnc1/Tnnt2/Ttn/Mybpc3/Rarres2/Postn/Csrp3/Atp1a1/Nppa/Nppb/Ccn2/Atp1b1/Sod1/Tcap/Fxyd1/Akap6/Ryr2/Dmd/Dmpk/Acta2/Cacna1c	29
FB.upregulated	FB	upregulated	GO:0055002	striated muscle cell development	0.0625	177/16955	1.34e-09	1.02e-07	8.74e-08	Acta1/Actc1/Actg1/Myh6/Myl2/Tnnt2/Ttn/Mybpc3/Lmod2/Naca/Csrp3/Sorbs2/Tcap/Actn2/Fhl2/Akap6/Dmd/Ldb3	18
FB.upregulated	FB	upregulated	GO:0045333	cellular respiration	0.0555556	141/16955	2.27e-09	1.7e-07	1.45e-07	Cox4i1/Cox6a2/Cox7c/Mdh1/Ndufb9/Uqcrb/Uqcrq/Cox5a/Uqcrh/Ndufa5/Mdh2/Aco2/Cyc1/Uqcr10/Atp5d/Cox6a1	16
FB.upregulated	FB	upregulated	GO:0009142	nucleoside triphosphate biosynthetic process	0.0416667	72/16955	2.85e-09	2.08e-07	1.77e-07	Aldoa/Atp5a1/Atp5b/Atp5g1/Atp5g3/Atp5l/Nme2/Atp5j2/Atp5e/Atp5k/Cyc1/Atp5d	12
FB.upregulated	FB	upregulated	GO:0009205	purine ribonucleoside triphosphate metabolic process	0.0416667	73/16955	3.35e-09	2.34e-07	2e-07	Aldoa/Atp5a1/Atp5b/Atp5g1/Atp5g3/Atp5l/Nme2/Atp5j2/Atp5e/Atp5k/Cyc1/Atp5d	12
FB.upregulated	FB	upregulated	GO:0022904	respiratory electron transport chain	0.0416667	73/16955	3.35e-09	2.34e-07	2e-07	Cox4i1/Cox6a2/Cox7c/Ndufb9/Uqcrb/Uqcrq/Cox5a/Uqcrh/Ndufa5/Cyc1/Uqcr10/Cox6a1	12
FB.upregulated	FB	upregulated	GO:0055001	muscle cell development	0.0625	192/16955	4.96e-09	3.39e-07	2.9e-07	Acta1/Actc1/Actg1/Myh6/Myl2/Tnnt2/Ttn/Mybpc3/Lmod2/Naca/Csrp3/Sorbs2/Tcap/Actn2/Fhl2/Akap6/Dmd/Ldb3	18
FB.upregulated	FB	upregulated	GO:0045214	sarcomere organization	0.0347222	47/16955	5.09e-09	3.41e-07	2.91e-07	Actg1/Myh6/Tnnt2/Ttn/Mybpc3/Lmod2/Csrp3/Tcap/Actn2/Ldb3	10
FB.upregulated	FB	upregulated	GO:0007517	muscle organ development	0.0868056	372/16955	5.35e-09	3.48e-07	2.97e-07	Acta1/Actc1/Ankrd1/Cryab/Gja1/Myh6/Myl2/Myl3/Tnnc1/Tnnt2/Ttn/Xirp2/Mybpc3/Myl6/Des/Naca/Csrp3/Ly6e/Tcap/Akap6/Ryr2/Rbm24/Dmd/Tsc22d3/Erbb4	25
FB.upregulated	FB	upregulated	GO:0022900	electron transport chain	0.0416667	76/16955	5.41e-09	3.48e-07	2.97e-07	Cox4i1/Cox6a2/Cox7c/Ndufb9/Uqcrb/Uqcrq/Cox5a/Uqcrh/Ndufa5/Cyc1/Uqcr10/Cox6a1	12
FB.upregulated	FB	upregulated	GO:0009199	ribonucleoside triphosphate metabolic process	0.0416667	77/16955	6.31e-09	3.98e-07	3.4e-07	Aldoa/Atp5a1/Atp5b/Atp5g1/Atp5g3/Atp5l/Nme2/Atp5j2/Atp5e/Atp5k/Cyc1/Atp5d	12
FB.upregulated	FB	upregulated	GO:1902600	proton transmembrane transport	0.0416667	78/16955	7.35e-09	4.55e-07	3.89e-07	Atp5a1/Atp5b/Atp5g1/Atp5g3/Atp5l/Atp5j2/Atp5e/Atp5k/Atp1a1/Cyc1/Atp5d/Cox17	12
FB.upregulated	FB	upregulated	GO:0010927	cellular component assembly involved in morphogenesis	0.0486111	114/16955	8.3e-09	5.05e-07	4.31e-07	Acta1/Actc1/Actg1/Myh6/Myl2/Tnnt2/Ttn/Mybpc3/Lmod2/Csrp3/Tcap/Tenm4/Actn2/Ldb3	14
FB.upregulated	FB	upregulated	GO:0006942	regulation of striated muscle contraction	0.0416667	82/16955	1.32e-08	7.73e-07	6.61e-07	Myl3/Pln/Atp1a1/Nppa/Ccn2/Atp1b1/Fxyd1/Akap6/Ryr2/Dmd/Dmpk/Cacna1c	12
FB.upregulated	FB	upregulated	GO:0009144	purine nucleoside triphosphate metabolic process	0.0416667	82/16955	1.32e-08	7.73e-07	6.61e-07	Aldoa/Atp5a1/Atp5b/Atp5g1/Atp5g3/Atp5l/Nme2/Atp5j2/Atp5e/Atp5k/Cyc1/Atp5d	12
FB.upregulated	FB	upregulated	GO:0006937	regulation of muscle contraction	0.0520833	144/16955	2.35e-08	1.36e-06	1.16e-06	Myl3/Pln/Tnnc1/Tnnt2/Atp1a1/Nppa/Ccn2/Atp1b1/Sod1/Fxyd1/Akap6/Ryr2/Dmd/Dmpk/Cacna1c	15
FB.upregulated	FB	upregulated	GO:0006417	regulation of translation	0.0763889	325/16955	4.04e-08	2.29e-06	1.95e-06	Gapdh/Igfbp5/Rack1/Rpl10/Rpl13a/Rpl26/Rpl38/Rpl5/Rplp1/Rps3/Rps3a1/Rps9/Vim/Eef2/Rpl22/Eif3c/Eif4g2/Eif5a/Rps27l/Akap6/Rbm24/Rbm20	22
FB.upregulated	FB	upregulated	GO:0070252	actin-mediated cell contraction	0.0416667	92/16955	4.97e-08	2.76e-06	2.36e-06	Actc1/Myh6/Pln/Tnnc1/Tnnt2/Myl6/Atp1a1/Fxyd1/Akap6/Ryr2/Acta2/Cacna1c	12
FB.upregulated	FB	upregulated	GO:0009152	purine ribonucleotide biosynthetic process	0.0486111	133/16955	6.09e-08	3.29e-06	2.81e-06	Aldoa/Atp5a1/Atp5b/Atp5g1/Atp5g3/Atp5l/Nme2/Atp5j2/Atp5e/Atp5k/Cyc1/Nppa/Nppb/Atp5d	14
FB.upregulated	FB	upregulated	GO:0042776	mitochondrial ATP synthesis coupled proton transport	0.0208333	14/16955	6.11e-08	3.29e-06	2.81e-06	Atp5a1/Atp5b/Atp5l/Atp5j2/Cyc1/Atp5d	6
FB.upregulated	FB	upregulated	GO:0015980	energy derivation by oxidation of organic compounds	0.0625	226/16955	6.31e-08	3.34e-06	2.85e-06	Cox4i1/Cox6a2/Cox7c/Mdh1/Ndufb9/Uqcrb/Uqcrq/Cox5a/Uqcrh/Ndufa5/Mdh2/Aco2/Cyc1/Uqcr10/Atp5d/Igf2/Cox6a1/Gyg	18
FB.upregulated	FB	upregulated	GO:1903522	regulation of blood circulation	0.0625	229/16955	7.71e-08	4.02e-06	3.43e-06	Gja1/Myh6/Myl2/Myl3/Pln/Tnnt2/Mybpc3/Csrp3/Atp1a1/Nppa/Ccn2/Atp1b1/Fxyd1/Akap6/Ryr2/Dmd/Dmpk/Cacna1c	18
FB.upregulated	FB	upregulated	GO:1903115	regulation of actin filament-based movement	0.03125	48/16955	9.75e-08	5e-06	4.28e-06	Pln/Tnnc1/Tnnt2/Atp1a1/Fxyd1/Akap6/Ryr2/Acta2/Cacna1c	9
FB.upregulated	FB	upregulated	GO:0034248	regulation of cellular amide metabolic process	0.0798611	377/16955	1.31e-07	6.64e-06	5.67e-06	Apoe/Gapdh/Igfbp5/Rack1/Rpl10/Rpl13a/Rpl26/Rpl38/Rpl5/Rplp1/Rps3/Rps3a1/Rps9/Vim/Eef2/Rpl22/Eif3c/Eif4g2/Eif5a/Rps27l/Akap6/Rbm24/Rbm20	23
FB.upregulated	FB	upregulated	GO:0009260	ribonucleotide biosynthetic process	0.0486111	142/16955	1.39e-07	6.92e-06	5.92e-06	Aldoa/Atp5a1/Atp5b/Atp5g1/Atp5g3/Atp5l/Nme2/Atp5j2/Atp5e/Atp5k/Cyc1/Nppa/Nppb/Atp5d	14
FB.upregulated	FB	upregulated	GO:0009141	nucleoside triphosphate metabolic process	0.0416667	102/16955	1.59e-07	7.79e-06	6.66e-06	Aldoa/Atp5a1/Atp5b/Atp5g1/Atp5g3/Atp5l/Nme2/Atp5j2/Atp5e/Atp5k/Cyc1/Atp5d	12
FB.upregulated	FB	upregulated	GO:0055117	regulation of cardiac muscle contraction	0.0347222	68/16955	2.09e-07	1.01e-05	8.61e-06	Pln/Atp1a1/Nppa/Ccn2/Atp1b1/Fxyd1/Akap6/Ryr2/Dmd/Cacna1c	10
FB.upregulated	FB	upregulated	GO:0046390	ribose phosphate biosynthetic process	0.0486111	148/16955	2.33e-07	1.11e-05	9.48e-06	Aldoa/Atp5a1/Atp5b/Atp5g1/Atp5g3/Atp5l/Nme2/Atp5j2/Atp5e/Atp5k/Cyc1/Nppa/Nppb/Atp5d	14
FB.upregulated	FB	upregulated	GO:0003007	heart morphogenesis	0.0625	249/16955	2.72e-07	1.27e-05	1.09e-05	Actc1/Ankrd1/Gja1/Myh6/Myl2/Myl3/Tnnc1/Tnnt2/Ttn/Xirp2/Mybpc3/Cpe/Naca/Ly6e/Gng5/Tcap/Fhl2/Ryr2	18
FB.upregulated	FB	upregulated	GO:0006164	purine nucleotide biosynthetic process	0.0486111	151/16955	2.99e-07	1.38e-05	1.18e-05	Aldoa/Atp5a1/Atp5b/Atp5g1/Atp5g3/Atp5l/Nme2/Atp5j2/Atp5e/Atp5k/Cyc1/Nppa/Nppb/Atp5d	14
FB.upregulated	FB	upregulated	GO:0006122	mitochondrial electron transport, ubiquinol to cytochrome c	0.0173611	10/16955	3.21e-07	1.42e-05	1.22e-05	Uqcrb/Uqcrq/Uqcrh/Cyc1/Uqcr10	5
FB.upregulated	FB	upregulated	GO:0006123	mitochondrial electron transport, cytochrome c to oxygen	0.0173611	10/16955	3.21e-07	1.42e-05	1.22e-05	Cox4i1/Cox6a2/Cox7c/Cox5a/Cox6a1	5
FB.upregulated	FB	upregulated	GO:0019646	aerobic electron transport chain	0.0173611	10/16955	3.21e-07	1.42e-05	1.22e-05	Cox4i1/Cox6a2/Cox7c/Cox5a/Cox6a1	5
FB.upregulated	FB	upregulated	GO:0090257	regulation of muscle system process	0.0590278	230/16955	4.29e-07	1.86e-05	1.59e-05	Igfbp5/Myl3/Pln/Tnnc1/Tnnt2/Ttn/Atp1a1/Nppa/Ccn2/Atp1b1/Sod1/Fxyd1/Akap6/Ryr2/Dmd/Dmpk/Cacna1c	17
FB.upregulated	FB	upregulated	GO:0002026	regulation of the force of heart contraction	0.0243056	29/16955	4.3e-07	1.86e-05	1.59e-05	Myh6/Myl2/Myl3/Pln/Csrp3/Atp1a1/Ryr2	7
FB.upregulated	FB	upregulated	GO:0072522	purine-containing compound biosynthetic process	0.0486111	156/16955	4.47e-07	1.9e-05	1.63e-05	Aldoa/Atp5a1/Atp5b/Atp5g1/Atp5g3/Atp5l/Nme2/Atp5j2/Atp5e/Atp5k/Cyc1/Nppa/Nppb/Atp5d	14
FB.upregulated	FB	upregulated	GO:0035994	response to muscle stretch	0.0208333	19/16955	5.14e-07	2.16e-05	1.85e-05	Ankrd1/Ttn/Csrp3/Tcap/Ryr2/Dmd	6
FB.upregulated	FB	upregulated	GO:0033275	actin-myosin filament sliding	0.0173611	11/16955	5.8e-07	2.41e-05	2.06e-05	Actc1/Myh6/Tnnc1/Tnnt2/Myl6	5
FB.upregulated	FB	upregulated	GO:0034470	ncRNA processing	0.0729167	350/16955	6.17e-07	2.53e-05	2.16e-05	Rpl11/Rpl26/Rpl27/Rpl35/Rpl35a/Rpl5/Rpl7/Rpl7a/Rps14/Rps15/Rps16/Rps17/Rps19/Rps21/Rps24/Rps28/Rps6/Rps7/Rps8/Rpl14/Rpl10a	21
FB.upregulated	FB	upregulated	GO:0006414	translational elongation	0.0277778	45/16955	7.86e-07	3.18e-05	2.72e-05	Eef1a1/Rack1/Rplp1/Rplp2/Eef2/Eef1b2/Eef1a2/Eif5a	8
FB.upregulated	FB	upregulated	GO:0030048	actin filament-based movement	0.0416667	124/16955	1.35e-06	5.38e-05	4.6e-05	Actc1/Myh6/Pln/Tnnc1/Tnnt2/Myl6/Atp1a1/Fxyd1/Akap6/Ryr2/Acta2/Cacna1c	12
FB.upregulated	FB	upregulated	GO:0006457	protein folding	0.0451389	148/16955	1.48e-06	5.83e-05	4.99e-05	B2m/Cd74/Cryab/Hsp90aa1/Hsp90ab1/Hspa8/Hspa9/Hspd1/Ppia/Nppa/Hspe1/Hspb1/Grn	13
FB.upregulated	FB	upregulated	GO:0055010	ventricular cardiac muscle tissue morphogenesis	0.0277778	50/16955	1.82e-06	7.1e-05	6.07e-05	Myh6/Myl2/Myl3/Tnnc1/Tnnt2/Mybpc3/Ly6e/Ryr2	8
FB.upregulated	FB	upregulated	GO:1901798	positive regulation of signal transduction by p53 class mediator	0.0208333	25/16955	3.08e-06	0.000119	0.000102	Ankrd1/Rpl11/Rpl23/Rpl26/Rps7/Ubb	6
FB.upregulated	FB	upregulated	GO:0055013	cardiac muscle cell development	0.0347222	91/16955	3.27e-06	0.000125	0.000107	Actc1/Myh6/Myl2/Ttn/Csrp3/Sorbs2/Tcap/Actn2/Fhl2/Akap6	10
FB.upregulated	FB	upregulated	GO:0003208	cardiac ventricle morphogenesis	0.03125	72/16955	3.47e-06	0.000131	0.000112	Myh6/Myl2/Myl3/Tnnc1/Tnnt2/Mybpc3/Cpe/Ly6e/Ryr2	9
FB.upregulated	FB	upregulated	GO:2001242	regulation of intrinsic apoptotic signaling pathway	0.0451389	160/16955	3.53e-06	0.000132	0.000113	Cd74/Rack1/Rpl11/Rpl26/Rps3/Rps7/Tpt1/Ubb/Serinc3/Sod1/Herpud1/Hspb1/Ivns1abp	13
FB.upregulated	FB	upregulated	GO:0055006	cardiac cell development	0.0347222	97/16955	5.85e-06	0.000216	0.000184	Actc1/Myh6/Myl2/Ttn/Csrp3/Sorbs2/Tcap/Actn2/Fhl2/Akap6	10
FB.upregulated	FB	upregulated	GO:0071353	cellular response to interleukin-4	0.0208333	28/16955	6.27e-06	0.000229	0.000195	Hsp90ab1/Rpl3/Rplp0/Rps2/Tuba1b/Mrc1	6
FB.upregulated	FB	upregulated	GO:0009165	nucleotide biosynthetic process	0.0486111	195/16955	6.36e-06	0.000229	0.000196	Aldoa/Atp5a1/Atp5b/Atp5g1/Atp5g3/Atp5l/Nme2/Atp5j2/Atp5e/Atp5k/Cyc1/Nppa/Nppb/Atp5d	14
FB.upregulated	FB	upregulated	GO:0015672	monovalent inorganic cation transport	0.0763889	439/16955	6.42e-06	0.000229	0.000196	Atp5a1/Atp5b/Atp5g1/Atp5g3/Atp5l/Cd63/Atp5j2/Atp5e/Atp5k/Atp1a1/Cyc1/Nppa/Atp5d/Atp1b1/Aqp1/Cox17/Actn2/Fxyd1/Akap6/Atf4/Dmd/Dmpk	22
FB.upregulated	FB	upregulated	GO:0003229	ventricular cardiac muscle tissue development	0.0277778	59/16955	6.58e-06	0.000232	0.000198	Myh6/Myl2/Myl3/Tnnc1/Tnnt2/Mybpc3/Ly6e/Ryr2	8
FB.upregulated	FB	upregulated	GO:0045727	positive regulation of translation	0.0381944	121/16955	6.85e-06	0.000239	0.000204	Rpl26/Rpl5/Rps3a1/Rps9/Vim/Eef2/Eif3c/Eif4g2/Eif5a/Rps27l/Akap6	11
FB.upregulated	FB	upregulated	GO:0097193	intrinsic apoptotic signaling pathway	0.0590278	282/16955	6.97e-06	0.000241	0.000206	Cd74/Crip1/Rack1/Rpl11/Rpl26/Rps3/Rps7/Tpt1/Ubb/Serinc3/Hint1/Sod1/Herpud1/Hspb1/Ivns1abp/Rps27l/Atf4	17
FB.upregulated	FB	upregulated	GO:1901293	nucleoside phosphate biosynthetic process	0.0486111	199/16955	8.03e-06	0.000275	0.000235	Aldoa/Atp5a1/Atp5b/Atp5g1/Atp5g3/Atp5l/Nme2/Atp5j2/Atp5e/Atp5k/Cyc1/Nppa/Nppb/Atp5d	14
FB.upregulated	FB	upregulated	GO:0010608	posttranscriptional regulation of gene expression	0.0763889	447/16955	8.54e-06	0.000289	0.000247	Gapdh/Igfbp5/Rack1/Rpl10/Rpl13a/Rpl26/Rpl38/Rpl5/Rplp1/Rps3/Rps3a1/Rps9/Vim/Eef2/Rpl22/Eif3c/Eif4g2/Eif5a/Rps27l/Akap6/Rbm24/Rbm20	22
FB.upregulated	FB	upregulated	GO:0034250	positive regulation of cellular amide metabolic process	0.0416667	149/16955	9.2e-06	0.000308	0.000263	Apoe/Rpl26/Rpl5/Rps3a1/Rps9/Vim/Eef2/Eif3c/Eif4g2/Eif5a/Rps27l/Akap6	12
FB.upregulated	FB	upregulated	GO:0070670	response to interleukin-4	0.0208333	30/16955	9.61e-06	0.000318	0.000272	Hsp90ab1/Rpl3/Rplp0/Rps2/Tuba1b/Mrc1	6
FB.upregulated	FB	upregulated	GO:0042026	protein refolding	0.0173611	18/16955	9.76e-06	0.00032	0.000274	B2m/Hsp90aa1/Hspa8/Hspa9/Hspd1	5
FB.upregulated	FB	upregulated	GO:0031032	actomyosin structure organization	0.0486111	204/16955	1.07e-05	0.000347	0.000296	Acta1/Actc1/Actg1/Myh6/Myl2/Tnnt2/Ttn/Mybpc3/Lmod2/Csrp3/Ccn2/Tcap/Actn2/Ldb3	14
FB.upregulated	FB	upregulated	GO:0014897	striated muscle hypertrophy	0.0347222	104/16955	1.09e-05	0.000352	0.000301	Igfbp5/Myh6/Ttn/Csrp3/Nppa/Nppb/Sorbs2/Tcap/Akap6/Ryr2	10
FB.upregulated	FB	upregulated	GO:0006959	humoral immune response	0.0416667	153/16955	1.2e-05	0.000384	0.000328	B2m/C1qa/Cd81/Fau/Gapdh/Rpl30/Rpl39/Rps19/C1qb/Rarres2/C1qc/Mfap4	12
FB.upregulated	FB	upregulated	GO:2001244	positive regulation of intrinsic apoptotic signaling pathway	0.0277778	64/16955	1.22e-05	0.000385	0.000329	Rack1/Rpl11/Rpl26/Rps3/Rps7/Ubb/Serinc3/Sod1	8
FB.upregulated	FB	upregulated	GO:0014896	muscle hypertrophy	0.0347222	106/16955	1.3e-05	0.000404	0.000346	Igfbp5/Myh6/Ttn/Csrp3/Nppa/Nppb/Sorbs2/Tcap/Akap6/Ryr2	10
FB.upregulated	FB	upregulated	GO:0055003	cardiac myofibril assembly	0.0173611	19/16955	1.31e-05	0.000404	0.000346	Actc1/Myl2/Ttn/Csrp3/Tcap	5
FB.upregulated	FB	upregulated	GO:0009150	purine ribonucleotide metabolic process	0.0590278	299/16955	1.5e-05	0.000459	0.000393	Aldoa/Atp5a1/Atp5b/Atp5g1/Atp5g3/Atp5l/Gapdh/Nme2/Atp5j2/Atp5e/Atp5k/Cyc1/Nppa/Nppb/Atp5d/Hint1/Tpi1	17
FB.upregulated	FB	upregulated	GO:0034660	ncRNA metabolic process	0.0729167	430/16955	1.54e-05	0.000469	0.000401	Rpl11/Rpl26/Rpl27/Rpl35/Rpl35a/Rpl5/Rpl7/Rpl7a/Rps14/Rps15/Rps16/Rps17/Rps19/Rps21/Rps24/Rps28/Rps6/Rps7/Rps8/Rpl14/Rpl10a	21
FB.upregulated	FB	upregulated	GO:1904667	negative regulation of ubiquitin protein ligase activity	0.0138889	10/16955	1.58e-05	0.000476	0.000407	Rpl11/Rpl23/Rpl5/Rps7	4
FB.upregulated	FB	upregulated	GO:0003231	cardiac ventricle development	0.0381944	133/16955	1.69e-05	0.000505	0.000431	Myh6/Myl2/Myl3/Tnnc1/Tnnt2/Xirp2/Mybpc3/Cpe/Naca/Ly6e/Ryr2	11
FB.upregulated	FB	upregulated	GO:0009259	ribonucleotide metabolic process	0.0590278	309/16955	2.28e-05	0.000676	0.000577	Aldoa/Atp5a1/Atp5b/Atp5g1/Atp5g3/Atp5l/Gapdh/Nme2/Atp5j2/Atp5e/Atp5k/Cyc1/Nppa/Nppb/Atp5d/Hint1/Tpi1	17
FB.upregulated	FB	upregulated	GO:1901796	regulation of signal transduction by p53 class mediator	0.0277778	70/16955	2.38e-05	0.000698	0.000597	Ankrd1/Cd74/Rpl11/Rpl23/Rpl26/Rpl5/Rps7/Ubb	8
FB.upregulated	FB	upregulated	GO:0019693	ribose phosphate metabolic process	0.0590278	319/16955	3.42e-05	0.000994	0.000849	Aldoa/Atp5a1/Atp5b/Atp5g1/Atp5g3/Atp5l/Gapdh/Nme2/Atp5j2/Atp5e/Atp5k/Cyc1/Nppa/Nppb/Atp5d/Hint1/Tpi1	17
FB.upregulated	FB	upregulated	GO:0050821	protein stabilization	0.0416667	174/16955	4.34e-05	0.001251	0.001069	Cd74/Cryab/Gapdh/Hsp90aa1/Hsp90ab1/Hspd1/Rpl11/Rpl23/Rpl5/Rps7/Atp1b1/Grn	12
FB.upregulated	FB	upregulated	GO:0006163	purine nucleotide metabolic process	0.0590278	328/16955	4.85e-05	0.001383	0.001182	Aldoa/Atp5a1/Atp5b/Atp5g1/Atp5g3/Atp5l/Gapdh/Nme2/Atp5j2/Atp5e/Atp5k/Cyc1/Nppa/Nppb/Atp5d/Hint1/Tpi1	17
FB.upregulated	FB	upregulated	GO:0003300	cardiac muscle hypertrophy	0.03125	100/16955	5.12e-05	0.001448	0.001238	Myh6/Ttn/Csrp3/Nppa/Nppb/Sorbs2/Tcap/Akap6/Ryr2	9
FB.upregulated	FB	upregulated	GO:0086004	regulation of cardiac muscle cell contraction	0.0208333	40/16955	5.38e-05	0.001508	0.001289	Pln/Atp1a1/Fxyd1/Akap6/Ryr2/Cacna1c	6
FB.upregulated	FB	upregulated	GO:0003205	cardiac chamber development	0.0416667	178/16955	5.42e-05	0.001508	0.001289	Myh6/Myl2/Myl3/Tnnc1/Tnnt2/Xirp2/Mybpc3/Cpe/Naca/Ly6e/Fhl2/Ryr2	12
FB.upregulated	FB	upregulated	GO:0055007	cardiac muscle cell differentiation	0.0347222	128/16955	6.65e-05	0.001835	0.001568	Actc1/Myh6/Myl2/Ttn/Csrp3/Sorbs2/Tcap/Actn2/Fhl2/Akap6	10
FB.upregulated	FB	upregulated	GO:0010882	regulation of cardiac muscle contraction by calcium ion signaling	0.0138889	14/16955	7.14e-05	0.001952	0.001668	Pln/Atp1b1/Ryr2/Dmd	4
FB.upregulated	FB	upregulated	GO:0003206	cardiac chamber morphogenesis	0.0347222	133/16955	9.19e-05	0.002471	0.002112	Myh6/Myl2/Myl3/Tnnc1/Tnnt2/Mybpc3/Cpe/Ly6e/Fhl2/Ryr2	10
FB.upregulated	FB	upregulated	GO:0072331	signal transduction by p53 class mediator	0.0347222	133/16955	9.19e-05	0.002471	0.002112	Ankrd1/Cd74/Rpl11/Rpl23/Rpl26/Rpl5/Rps7/Ubb/Hint1/Rps27l	10
FB.upregulated	FB	upregulated	GO:0031647	regulation of protein stability	0.0520833	281/16955	9.71e-05	0.00259	0.002214	Cd74/Cd81/Cryab/Gapdh/Hsp90aa1/Hsp90ab1/Hspa8/Hspd1/Rpl11/Rpl23/Rpl5/Rps7/Serf2/Atp1b1/Grn	15
FB.upregulated	FB	upregulated	GO:0035051	cardiocyte differentiation	0.0381944	162/16955	0.000104	0.002746	0.002347	Actc1/Myh6/Myl2/Ttn/Csrp3/Sorbs2/Tcap/Tenm4/Actn2/Fhl2/Akap6	11
FB.upregulated	FB	upregulated	GO:0048747	muscle fiber development	0.0243056	65/16955	0.000114	0.002987	0.002553	Acta1/Myh6/Myl2/Ttn/Naca/Tcap/Dmd	7
FB.upregulated	FB	upregulated	GO:0090075	relaxation of muscle	0.0173611	29/16955	0.000116	0.003024	0.002585	Pln/Ttn/Atp1b1/Sod1/Akap6	5
FB.upregulated	FB	upregulated	GO:0014888	striated muscle adaptation	0.0208333	46/16955	0.000121	0.003118	0.002665	Igfbp5/Myh6/Tnnc1/Nppa/Nppb/Tcap	6
FB.upregulated	FB	upregulated	GO:0007512	adult heart development	0.0138889	16/16955	0.000126	0.003238	0.002768	Gja1/Myh6/Ttn/Tcap	4
FB.upregulated	FB	upregulated	GO:1902253	regulation of intrinsic apoptotic signaling pathway by p53 class mediator	0.0173611	30/16955	0.000137	0.003495	0.002988	Cd74/Rpl11/Rpl26/Rps7/Ubb	5
FB.upregulated	FB	upregulated	GO:0009612	response to mechanical stimulus	0.0347222	143/16955	0.000168	0.004231	0.003617	Ankrd1/Col1a1/Ttn/Got1/Csrp3/Atp1a1/Aqp1/Tcap/Ryr2/Dmd	10
FB.upregulated	FB	upregulated	GO:0030490	maturation of SSU-rRNA	0.0208333	49/16955	0.000173	0.004324	0.003696	Rps14/Rps16/Rps19/Rps21/Rps28/Rps8	6
FB.upregulated	FB	upregulated	GO:0072521	purine-containing compound metabolic process	0.0590278	365/16955	0.000178	0.004416	0.003775	Aldoa/Atp5a1/Atp5b/Atp5g1/Atp5g3/Atp5l/Gapdh/Nme2/Atp5j2/Atp5e/Atp5k/Cyc1/Nppa/Nppb/Atp5d/Hint1/Tpi1	17
FB.upregulated	FB	upregulated	GO:0002711	positive regulation of T cell mediated immunity	0.0208333	50/16955	0.000193	0.004772	0.004079	B2m/Cd81/H2-D1/H2-K1/Hspa8/Hspd1	6
FB.upregulated	FB	upregulated	GO:0019730	antimicrobial humoral response	0.0243056	71/16955	0.000199	0.004881	0.004172	B2m/Fau/Gapdh/Rpl30/Rpl39/Rps19/Rarres2	7
FB.upregulated	FB	upregulated	GO:0008217	regulation of blood pressure	0.0381944	175/16955	0.000205	0.004985	0.004261	Gja1/Myh6/Npr3/Rarres2/Postn/Atp1a1/Nppa/Nppb/Sod1/Acta2/Cacna1c	11
FB.upregulated	FB	upregulated	GO:0051444	negative regulation of ubiquitin-protein transferase activity	0.0138889	18/16955	0.000207	0.004989	0.004264	Rpl11/Rpl23/Rpl5/Rps7	4
FB.upregulated	FB	upregulated	GO:0061844	antimicrobial humoral immune response mediated by antimicrobial peptide	0.0208333	51/16955	0.000216	0.005176	0.004424	B2m/Fau/Gapdh/Rpl30/Rpl39/Rps19	6
FB.upregulated	FB	upregulated	GO:0071260	cellular response to mechanical stimulus	0.0173611	33/16955	0.000219	0.00522	0.004462	Ankrd1/Col1a1/Got1/Atp1a1/Aqp1	5
FB.upregulated	FB	upregulated	GO:0090407	organophosphate biosynthetic process	0.0625	408/16955	0.000225	0.005305	0.004535	Aldoa/Atp5a1/Atp5b/Atp5g1/Atp5g3/Atp5l/Fabp3/Nme2/Atp5j2/Atp5e/Fabp5/Atp5k/Cyc1/Ckm/Nppa/Nppb/Atp5d/Tpi1	18
FB.upregulated	FB	upregulated	GO:0001906	cell killing	0.0347222	152/16955	0.000275	0.006455	0.005517	B2m/Gapdh/H2-D1/H2-K1/Hsp90ab1/Hspa8/Rpl30/Rps19/Prdx1/Igf2	10
FB.upregulated	FB	upregulated	GO:0000462	maturation of SSU-rRNA from tricistronic rRNA transcript (SSU-rRNA, 5.8S rRNA, LSU-rRNA)	0.0173611	35/16955	0.000292	0.006797	0.00581	Rps14/Rps16/Rps19/Rps21/Rps8	5
FB.upregulated	FB	upregulated	GO:0072332	intrinsic apoptotic signaling pathway by p53 class mediator	0.0243056	76/16955	0.000305	0.007045	0.006021	Cd74/Rpl11/Rpl26/Rps7/Ubb/Hint1/Rps27l	7
FB.upregulated	FB	upregulated	GO:0042391	regulation of membrane potential	0.0625	422/16955	0.000338	0.00775	0.006625	Atp5g1/B2m/Chchd10/Gja1/Rack1/Ubb/Got1/Atp1a1/Nppa/Atp1b1/Sod1/Actn2/Fxyd1/Akap6/Ryr2/Dmd/Dmpk/Cacna1c	18
FB.upregulated	FB	upregulated	GO:1990542	mitochondrial transmembrane transport	0.0243056	79/16955	0.000387	0.008821	0.00754	Atp5a1/Atp5b/Atp5l/Hspd1/Atp5j2/Cyc1/Atp5d	7
FB.upregulated	FB	upregulated	GO:0032963	collagen metabolic process	0.0277778	104/16955	0.000396	0.008956	0.007655	Col1a1/Ctsb/Ctsl/Serpinh1/Vim/Got1/Ccn2/Mfap4	8
FB.upregulated	FB	upregulated	GO:0019932	second-messenger-mediated signaling	0.0590278	395/16955	0.000444	0.009988	0.008537	Apoe/Calm1/Gapdh/Nme2/Pln/Nppa/Nppb/Atp1b1/Hint1/Aqp1/Fhl2/Akap6/Ryr2/Mt1/Dmd/Dmpk/Rcan2	17
FB.upregulated	FB	upregulated	GO:0032970	regulation of actin filament-based process	0.0590278	396/16955	0.000457	0.010209	0.008726	Actg1/Ctsl/Pln/Tmsb4x/Tnnc1/Tnnt2/Lmod2/Csrp3/Atp1a1/Myadm/Ccn2/Actn2/Fxyd1/Akap6/Ryr2/Acta2/Cacna1c	17
FB.upregulated	FB	upregulated	GO:1904666	regulation of ubiquitin protein ligase activity	0.0138889	22/16955	0.000468	0.010388	0.008879	Rpl11/Rpl23/Rpl5/Rps7	4
FB.upregulated	FB	upregulated	GO:0002449	lymphocyte mediated immunity	0.0451389	260/16955	0.000525	0.01153	0.009856	B2m/C1qa/Cd74/Cd81/H2-D1/H2-K1/Hspa8/Hspd1/Il31ra/C1qb/C1qc/Prdx1/Igf2	13
FB.upregulated	FB	upregulated	GO:0009117	nucleotide metabolic process	0.0590278	401/16955	0.000527	0.01153	0.009856	Aldoa/Atp5a1/Atp5b/Atp5g1/Atp5g3/Atp5l/Gapdh/Nme2/Atp5j2/Atp5e/Atp5k/Cyc1/Nppa/Nppb/Atp5d/Hint1/Tpi1	17
FB.upregulated	FB	upregulated	GO:0048739	cardiac muscle fiber development	0.0104167	10/16955	0.000533	0.011579	0.009897	Myh6/Ttn/Tcap	3
FB.upregulated	FB	upregulated	GO:0086009	membrane repolarization	0.0173611	41/16955	0.00062	0.013395	0.011449	Gja1/Atp1a1/Nppa/Atp1b1/Akap6	5
FB.upregulated	FB	upregulated	GO:0006753	nucleoside phosphate metabolic process	0.0590278	408/16955	0.00064	0.013726	0.011732	Aldoa/Atp5a1/Atp5b/Atp5g1/Atp5g3/Atp5l/Gapdh/Nme2/Atp5j2/Atp5e/Atp5k/Cyc1/Nppa/Nppb/Atp5d/Hint1/Tpi1	17
FB.upregulated	FB	upregulated	GO:0006107	oxaloacetate metabolic process	0.0104167	11/16955	0.000723	0.015316	0.013091	Mdh1/Got1/Mdh2	3
FB.upregulated	FB	upregulated	GO:0010232	vascular transport	0.0104167	11/16955	0.000723	0.015316	0.013091	Apoe/Gja1/Fabp5	3
FB.upregulated	FB	upregulated	GO:0007565	female pregnancy	0.0277778	115/16955	0.000774	0.015964	0.013645	Ctsb/Ctsl/Gja1/Igfbp5/H3f3b/Nppa/Sod1/Grn	8
FB.upregulated	FB	upregulated	GO:0014902	myotube differentiation	0.0277778	115/16955	0.000774	0.015964	0.013645	Acta1/Cd81/Naca/Csrp3/Gdf15/Rbm24/Dmd/Dmpk	8
FB.upregulated	FB	upregulated	GO:0001937	negative regulation of endothelial cell proliferation	0.0173611	43/16955	0.000775	0.015964	0.013645	Apoe/Atp5a1/Gja1/Sparc/Flt1	5
FB.upregulated	FB	upregulated	GO:0003299	muscle hypertrophy in response to stress	0.0138889	25/16955	0.000778	0.015964	0.013645	Myh6/Nppa/Nppb/Tcap	4
FB.upregulated	FB	upregulated	GO:0014898	cardiac muscle hypertrophy in response to stress	0.0138889	25/16955	0.000778	0.015964	0.013645	Myh6/Nppa/Nppb/Tcap	4
FB.upregulated	FB	upregulated	GO:0071214	cellular response to abiotic stimulus	0.0416667	240/16955	0.000854	0.017307	0.014793	Actb/Ankrd1/Col1a1/Crip1/Cryab/Gja1/Rpl26/Got1/Ccnd2/Atp1a1/Aqp1/Mfap4	12
FB.upregulated	FB	upregulated	GO:0104004	cellular response to environmental stimulus	0.0416667	240/16955	0.000854	0.017307	0.014793	Actb/Ankrd1/Col1a1/Crip1/Cryab/Gja1/Rpl26/Got1/Ccnd2/Atp1a1/Aqp1/Mfap4	12
FB.upregulated	FB	upregulated	GO:0014887	cardiac muscle adaptation	0.0138889	26/16955	0.000908	0.018163	0.015524	Myh6/Nppa/Nppb/Tcap	4
FB.upregulated	FB	upregulated	GO:1901018	positive regulation of potassium ion transmembrane transporter activity	0.0138889	26/16955	0.000908	0.018163	0.015524	Nppa/Atp1b1/Actn2/Akap6	4
FB.upregulated	FB	upregulated	GO:0036376	sodium ion export across plasma membrane	0.0104167	12/16955	0.000952	0.018762	0.016036	Atp1a1/Atp1b1/Fxyd1	3
FB.upregulated	FB	upregulated	GO:0055119	relaxation of cardiac muscle	0.0104167	12/16955	0.000952	0.018762	0.016036	Ttn/Atp1b1/Akap6	3
FB.upregulated	FB	upregulated	GO:0086003	cardiac muscle cell contraction	0.0208333	67/16955	0.000955	0.018762	0.016036	Pln/Atp1a1/Fxyd1/Akap6/Ryr2/Cacna1c	6
FB.upregulated	FB	upregulated	GO:0010035	response to inorganic substance	0.0590278	425/16955	0.001004	0.019609	0.01676	B2m/Crip1/Cryab/Gapdh/Pln/Rack1/Rps3/Tnnc1/Tnnt2/Ttn/Fabp4/Psap/Prdx1/Aqp1/Sod1/Ryr2/Mt1	17
FB.upregulated	FB	upregulated	GO:0001731	formation of translation preinitiation complex	0.0104167	13/16955	0.001223	0.023743	0.020294	Rpl13a/Rps2/Eif2s2	3
FB.upregulated	FB	upregulated	GO:0031341	regulation of cell killing	0.0243056	96/16955	0.001247	0.024066	0.020571	B2m/Gapdh/H2-D1/H2-K1/Hsp90ab1/Hspa8/Igf2	7
FB.upregulated	FB	upregulated	GO:0010657	muscle cell apoptotic process	0.0243056	97/16955	0.001324	0.025307	0.021631	Gapdh/Hspa8/Naca/Eif5a/Atf4/Dmpk/Erbb4	7
FB.upregulated	FB	upregulated	GO:0035265	organ growth	0.0347222	186/16955	0.001326	0.025307	0.021631	Gja1/Myh6/Ttn/Psap/Ly6e/Sorbs2/Tenm4/Akap6/Cacna1c/Erbb4	10
FB.upregulated	FB	upregulated	GO:0051147	regulation of muscle cell differentiation	0.03125	155/16955	0.001346	0.025534	0.021825	Tmsb4x/Naca/Csrp3/Igf2/Gdf15/Eif5a/Akap6/Rbm24/Dmpk	9
FB.upregulated	FB	upregulated	GO:0000470	maturation of LSU-rRNA	0.0138889	29/16955	0.001385	0.025834	0.022081	Rpl35/Rpl7/Rpl7a/Rpl10a	4
FB.upregulated	FB	upregulated	GO:0001916	positive regulation of T cell mediated cytotoxicity	0.0138889	29/16955	0.001385	0.025834	0.022081	B2m/H2-D1/H2-K1/Hspa8	4
FB.upregulated	FB	upregulated	GO:0051085	chaperone cofactor-dependent protein refolding	0.0138889	29/16955	0.001385	0.025834	0.022081	Cd74/Hspa8/Hspa9/Hspe1	4
FB.upregulated	FB	upregulated	GO:0051438	regulation of ubiquitin-protein transferase activity	0.0173611	49/16955	0.001414	0.026063	0.022277	Rpl11/Rpl23/Rpl5/Rps2/Rps7	5
FB.upregulated	FB	upregulated	GO:2000059	negative regulation of ubiquitin-dependent protein catabolic process	0.0173611	49/16955	0.001414	0.026063	0.022277	Hsp90ab1/Rpl11/Rpl23/Rpl5/Rps7	5
FB.upregulated	FB	upregulated	GO:0010595	positive regulation of endothelial cell migration	0.0243056	99/16955	0.001491	0.027282	0.023319	Atp5a1/Atp5b/Sparc/Bsg/Igf2/Hspb1/Grn	7
FB.upregulated	FB	upregulated	GO:0002709	regulation of T cell mediated immunity	0.0208333	73/16955	0.001496	0.027282	0.023319	B2m/Cd81/H2-D1/H2-K1/Hspa8/Hspd1	6
FB.upregulated	FB	upregulated	GO:1901077	regulation of relaxation of muscle	0.0104167	14/16955	0.001537	0.027862	0.023815	Pln/Ttn/Akap6	3
FB.upregulated	FB	upregulated	GO:0048002	antigen processing and presentation of peptide antigen	0.0173611	50/16955	0.001549	0.027935	0.023877	B2m/Cd74/Ctsl/H2-D1/H2-K1	5
FB.upregulated	FB	upregulated	GO:1904064	positive regulation of cation transmembrane transport	0.03125	159/16955	0.001606	0.028807	0.024622	Nppa/Atp1b1/Cox17/Actn2/Fxyd1/Akap6/Ryr2/Dmd/Cacna1c	9
FB.upregulated	FB	upregulated	GO:0006839	mitochondrial transport	0.0347222	194/16955	0.001815	0.032366	0.027664	Atp5a1/Atp5b/Atp5l/Chchd10/Hsp90aa1/Hspd1/Slc25a5/Atp5j2/Cyc1/Atp5d	10
FB.upregulated	FB	upregulated	GO:0031397	negative regulation of protein ubiquitination	0.0208333	76/16955	0.001842	0.032592	0.027858	Rpl11/Rpl23/Rpl5/Rps3/Rps7/Ivns1abp	6
FB.upregulated	FB	upregulated	GO:0061077	chaperone-mediated protein folding	0.0173611	52/16955	0.001849	0.032592	0.027858	Cd74/Hspa8/Hspa9/Hspe1/Hspb1	5
FB.upregulated	FB	upregulated	GO:0019722	calcium-mediated signaling	0.0347222	195/16955	0.001885	0.032592	0.027858	Calm1/Pln/Atp1b1/Hint1/Fhl2/Akap6/Ryr2/Dmd/Dmpk/Rcan2	10
FB.upregulated	FB	upregulated	GO:0042742	defense response to bacterium	0.0347222	195/16955	0.001885	0.032592	0.027858	B2m/Fau/H2-K1/Lyz2/Rpl30/Rpl39/Rps19/Rarres2/Grn/Stab1	10
FB.upregulated	FB	upregulated	GO:0051651	maintenance of location in cell	0.0347222	195/16955	0.001885	0.032592	0.027858	Apoe/Chchd10/Fth1/Ftl1/Gja1/Pln/Tmsb4x/Akap6/Ryr2/Dmd	10
FB.upregulated	FB	upregulated	GO:0002428	antigen processing and presentation of peptide antigen via MHC class Ib	0.0104167	15/16955	0.001897	0.032592	0.027858	B2m/H2-D1/H2-K1	3
FB.upregulated	FB	upregulated	GO:0045989	positive regulation of striated muscle contraction	0.0104167	15/16955	0.001897	0.032592	0.027858	Atp1a1/Nppa/Ccn2	3
FB.upregulated	FB	upregulated	GO:0050829	defense response to Gram-negative bacterium	0.0173611	53/16955	0.002013	0.034236	0.029263	B2m/Lyz2/Rpl30/Rps19/Rarres2	5
FB.upregulated	FB	upregulated	GO:0140115	export across plasma membrane	0.0173611	53/16955	0.002013	0.034236	0.029263	Gja1/Atp1a1/Nppa/Atp1b1/Fxyd1	5
FB.upregulated	FB	upregulated	GO:0002456	T cell mediated immunity	0.0243056	105/16955	0.002093	0.035402	0.030259	B2m/Cd81/H2-D1/H2-K1/Hspa8/Hspd1/Il31ra	7
FB.upregulated	FB	upregulated	GO:1901019	regulation of calcium ion transmembrane transporter activity	0.0208333	78/16955	0.002104	0.035415	0.030271	Pln/Nppa/Atp1b1/Akap6/Ryr2/Dmd	6
FB.upregulated	FB	upregulated	GO:0002443	leukocyte mediated immunity	0.0486111	342/16955	0.002225	0.037254	0.031842	B2m/C1qa/Cd74/Cd81/H2-D1/H2-K1/Hspa8/Hspd1/Il31ra/C1qb/C1qc/Nppa/Prdx1/Igf2	14
FB.upregulated	FB	upregulated	GO:0019934	cGMP-mediated signaling	0.0138889	33/16955	0.002263	0.037704	0.032227	Apoe/Nppa/Nppb/Aqp1	4
FB.upregulated	FB	upregulated	GO:0060314	regulation of ryanodine-sensitive calcium-release channel activity	0.0104167	16/16955	0.002305	0.038212	0.032661	Pln/Akap6/Dmd	3
FB.upregulated	FB	upregulated	GO:0033108	mitochondrial respiratory chain complex assembly	0.0208333	80/16955	0.002393	0.039474	0.03374	Ndufb9/Uqcrb/Ndufa5/Uqcr10/Ndufa11/Cox17	6
FB.upregulated	FB	upregulated	GO:0031396	regulation of protein ubiquitination	0.0347222	202/16955	0.002439	0.040024	0.03421	Hsp90aa1/Hsp90ab1/Rpl11/Rpl23/Rpl5/Rps2/Rps3/Rps7/Herpud1/Ivns1abp	10
FB.upregulated	FB	upregulated	GO:0034101	erythrocyte homeostasis	0.0277778	138/16955	0.002488	0.04062	0.03472	B2m/Hspa9/Rps14/Rps17/Rps19/Rps24/Rps6/Prdx1	8
FB.upregulated	FB	upregulated	GO:0001914	regulation of T cell mediated cytotoxicity	0.0138889	34/16955	0.002531	0.04072	0.034805	B2m/H2-D1/H2-K1/Hspa8	4
FB.upregulated	FB	upregulated	GO:0006458	de novo' protein folding	0.0138889	34/16955	0.002531	0.04072	0.034805	Cd74/Hspa8/Hspa9/Hspe1	4
FB.upregulated	FB	upregulated	GO:0051084	de novo' posttranslational protein folding	0.0138889	34/16955	0.002531	0.04072	0.034805	Cd74/Hspa8/Hspa9/Hspe1	4
FB.upregulated	FB	upregulated	GO:0051149	positive regulation of muscle cell differentiation	0.0208333	81/16955	0.002549	0.040806	0.034879	Tmsb4x/Csrp3/Gdf15/Eif5a/Akap6/Rbm24	6
FB.upregulated	FB	upregulated	GO:0032964	collagen biosynthetic process	0.0173611	56/16955	0.002572	0.04097	0.035019	Col1a1/Serpinh1/Vim/Got1/Ccn2	5
FB.upregulated	FB	upregulated	GO:0032414	positive regulation of ion transmembrane transporter activity	0.0243056	109/16955	0.002587	0.04102	0.035062	Nppa/Atp1b1/Cox17/Actn2/Akap6/Ryr2/Dmd	7
FB.upregulated	FB	upregulated	GO:0055086	nucleobase-containing small molecule metabolic process	0.0590278	467/16955	0.002718	0.04257	0.036386	Aldoa/Atp5a1/Atp5b/Atp5g1/Atp5g3/Atp5l/Gapdh/Nme2/Atp5j2/Atp5e/Atp5k/Cyc1/Nppa/Nppb/Atp5d/Hint1/Tpi1	17
FB.upregulated	FB	upregulated	GO:0044706	multi-multicellular organism process	0.0277778	140/16955	0.00272	0.04257	0.036386	Ctsb/Ctsl/Gja1/Igfbp5/H3f3b/Nppa/Sod1/Grn	8
FB.upregulated	FB	upregulated	GO:0060419	heart growth	0.0243056	110/16955	0.002724	0.04257	0.036386	Gja1/Myh6/Ttn/Sorbs2/Tenm4/Akap6/Erbb4	7
FB.upregulated	FB	upregulated	GO:1990000	amyloid fibril formation	0.0104167	17/16955	0.002764	0.042998	0.036752	Apoe/B2m/Cryab	3
FB.upregulated	FB	upregulated	GO:0002262	myeloid cell homeostasis	0.03125	173/16955	0.002851	0.043932	0.03755	B2m/Hspa9/Rps14/Rps17/Rps19/Rps24/Rps6/Prdx1/Sod1	9
FB.upregulated	FB	upregulated	GO:0034767	positive regulation of ion transmembrane transport	0.03125	173/16955	0.002851	0.043932	0.03755	Nppa/Atp1b1/Cox17/Actn2/Fxyd1/Akap6/Ryr2/Dmd/Cacna1c	9
FB.upregulated	FB	upregulated	GO:0019058	viral life cycle	0.0347222	207/16955	0.00291	0.044626	0.038143	Apoe/Cd74/Ctsb/Hsp90ab1/Hspa8/Ifitm3/Ppia/Ifitm2/Bsg/Pcbp1	10
FB.upregulated	FB	upregulated	GO:0050680	negative regulation of epithelial cell proliferation	0.0277778	142/16955	0.002968	0.045313	0.038731	Apoe/Atp5a1/B2m/Ctsl/Gja1/Sparc/Nppb/Flt1	8
FB.upregulated	FB	upregulated	GO:0010830	regulation of myotube differentiation	0.0173611	58/16955	0.003001	0.045602	0.038978	Naca/Csrp3/Gdf15/Rbm24/Dmpk	5
FB.upregulated	FB	upregulated	GO:0003009	skeletal muscle contraction	0.0138889	36/16955	0.003131	0.047015	0.040186	Tnnc1/Tcap/Dmd/Dmpk	4
FB.upregulated	FB	upregulated	GO:1902229	regulation of intrinsic apoptotic signaling pathway in response to DNA damage	0.0138889	36/16955	0.003131	0.047015	0.040186	Cd74/Rpl26/Rps3/Tpt1	4
FB.upregulated	FB	upregulated	GO:2001233	regulation of apoptotic signaling pathway	0.0520833	394/16955	0.003137	0.047015	0.040186	Cd74/Chchd10/Rack1/Rpl11/Rpl26/Rps3/Rps7/Slc25a5/Tpt1/Ubb/Serinc3/Sod1/Herpud1/Hspb1/Ivns1abp	15
FB.upregulated	FB	upregulated	GO:2001235	positive regulation of apoptotic signaling pathway	0.03125	176/16955	0.003197	0.047699	0.04077	Chchd10/Rack1/Rpl11/Rpl26/Rps3/Rps7/Ubb/Serinc3/Sod1	9
FB.upregulated	FB	upregulated	GO:0002475	antigen processing and presentation via MHC class Ib	0.0104167	18/16955	0.003276	0.04843	0.041395	B2m/H2-D1/H2-K1	3
FB.upregulated	FB	upregulated	GO:0051131	chaperone-mediated protein complex assembly	0.0104167	18/16955	0.003276	0.04843	0.041395	Hsp90aa1/Hsp90ab1/Lonp1	3
FB.upregulated	FB	upregulated	GO:0006986	response to unfolded protein	0.0243056	114/16955	0.003327	0.048958	0.041847	Hsp90aa1/Hspa8/Hspa9/Hspd1/Herpud1/Hspb1/Atf4	7
FB.upregulated	FB	upregulated	GO:0010634	positive regulation of epithelial cell migration	0.0277778	145/16955	0.003374	0.049438	0.042256	Atp5a1/Atp5b/Sparc/Bsg/Igf2/Aqp1/Hspb1/Grn	8
LEC.upregulated	LEC	upregulated	GO:0044557	relaxation of smooth muscle	1	11/16955	0.000649	0.011766	NA	Sod1	1
LEC.upregulated	LEC	upregulated	GO:1902931	negative regulation of alcohol biosynthetic process	1	14/16955	0.000826	0.011766	NA	Sod1	1
LEC.upregulated	LEC	upregulated	GO:0050665	hydrogen peroxide biosynthetic process	1	15/16955	0.000885	0.011766	NA	Sod1	1
LEC.upregulated	LEC	upregulated	GO:0043217	myelin maintenance	1	16/16955	0.000944	0.011766	NA	Sod1	1
LEC.upregulated	LEC	upregulated	GO:0045986	negative regulation of smooth muscle contraction	1	17/16955	0.001003	0.011766	NA	Sod1	1
LEC.upregulated	LEC	upregulated	GO:0019430	removal of superoxide radicals	1	19/16955	0.001121	0.011766	NA	Sod1	1
LEC.upregulated	LEC	upregulated	GO:0045540	regulation of cholesterol biosynthetic process	1	19/16955	0.001121	0.011766	NA	Sod1	1
LEC.upregulated	LEC	upregulated	GO:0060088	auditory receptor cell stereocilium organization	1	19/16955	0.001121	0.011766	NA	Sod1	1
LEC.upregulated	LEC	upregulated	GO:0106118	regulation of sterol biosynthetic process	1	19/16955	0.001121	0.011766	NA	Sod1	1
LEC.upregulated	LEC	upregulated	GO:0046716	muscle cell cellular homeostasis	1	21/16955	0.001239	0.011766	NA	Sod1	1
LEC.upregulated	LEC	upregulated	GO:0071450	cellular response to oxygen radical	1	21/16955	0.001239	0.011766	NA	Sod1	1
LEC.upregulated	LEC	upregulated	GO:0071451	cellular response to superoxide	1	21/16955	0.001239	0.011766	NA	Sod1	1
LEC.upregulated	LEC	upregulated	GO:1903209	positive regulation of oxidative stress-induced cell death	1	21/16955	0.001239	0.011766	NA	Sod1	1
LEC.upregulated	LEC	upregulated	GO:0002093	auditory receptor cell morphogenesis	1	22/16955	0.001298	0.011766	NA	Sod1	1
LEC.upregulated	LEC	upregulated	GO:0010894	negative regulation of steroid biosynthetic process	1	22/16955	0.001298	0.011766	NA	Sod1	1
LEC.upregulated	LEC	upregulated	GO:0032930	positive regulation of superoxide anion generation	1	22/16955	0.001298	0.011766	NA	Sod1	1
LEC.upregulated	LEC	upregulated	GO:0045939	negative regulation of steroid metabolic process	1	22/16955	0.001298	0.011766	NA	Sod1	1
LEC.upregulated	LEC	upregulated	GO:0046688	response to copper ion	1	22/16955	0.001298	0.011766	NA	Sod1	1
LEC.upregulated	LEC	upregulated	GO:0098869	cellular oxidant detoxification	1	22/16955	0.001298	0.011766	NA	Sod1	1
LEC.upregulated	LEC	upregulated	GO:0008090	retrograde axonal transport	1	23/16955	0.001357	0.011766	NA	Sod1	1
LEC.upregulated	LEC	upregulated	GO:0000303	response to superoxide	1	24/16955	0.001416	0.011766	NA	Sod1	1
LEC.upregulated	LEC	upregulated	GO:1900409	positive regulation of cellular response to oxidative stress	1	24/16955	0.001416	0.011766	NA	Sod1	1
LEC.upregulated	LEC	upregulated	GO:0000305	response to oxygen radical	1	25/16955	0.001474	0.011766	NA	Sod1	1
LEC.upregulated	LEC	upregulated	GO:0032928	regulation of superoxide anion generation	1	25/16955	0.001474	0.011766	NA	Sod1	1
LEC.upregulated	LEC	upregulated	GO:1902175	regulation of oxidative stress-induced intrinsic apoptotic signaling pathway	1	26/16955	0.001533	0.011766	NA	Sod1	1
LEC.upregulated	LEC	upregulated	GO:1902884	positive regulation of response to oxidative stress	1	26/16955	0.001533	0.011766	NA	Sod1	1
LEC.upregulated	LEC	upregulated	GO:0045932	negative regulation of muscle contraction	1	28/16955	0.001651	0.011766	NA	Sod1	1
LEC.upregulated	LEC	upregulated	GO:0060117	auditory receptor cell development	1	28/16955	0.001651	0.011766	NA	Sod1	1
LEC.upregulated	LEC	upregulated	GO:0090075	relaxation of muscle	1	29/16955	0.00171	0.011766	NA	Sod1	1
LEC.upregulated	LEC	upregulated	GO:0022011	myelination in peripheral nervous system	1	30/16955	0.001769	0.011766	NA	Sod1	1
LEC.upregulated	LEC	upregulated	GO:0032292	peripheral nervous system axon ensheathment	1	30/16955	0.001769	0.011766	NA	Sod1	1
LEC.upregulated	LEC	upregulated	GO:0014044	Schwann cell development	1	33/16955	0.001946	0.011766	NA	Sod1	1
LEC.upregulated	LEC	upregulated	GO:0090181	regulation of cholesterol metabolic process	1	34/16955	0.002005	0.011766	NA	Sod1	1
LEC.upregulated	LEC	upregulated	GO:1990748	cellular detoxification	1	34/16955	0.002005	0.011766	NA	Sod1	1
LEC.upregulated	LEC	upregulated	GO:0042311	vasodilation	1	35/16955	0.002064	0.011766	NA	Sod1	1
LEC.upregulated	LEC	upregulated	GO:0042554	superoxide anion generation	1	36/16955	0.002123	0.011766	NA	Sod1	1
LEC.upregulated	LEC	upregulated	GO:0045104	intermediate filament cytoskeleton organization	1	37/16955	0.002182	0.011766	NA	Sod1	1
LEC.upregulated	LEC	upregulated	GO:0090322	regulation of superoxide metabolic process	1	37/16955	0.002182	0.011766	NA	Sod1	1
LEC.upregulated	LEC	upregulated	GO:0045103	intermediate filament-based process	1	38/16955	0.002241	0.011766	NA	Sod1	1
LEC.upregulated	LEC	upregulated	GO:0014037	Schwann cell differentiation	1	40/16955	0.002359	0.011766	NA	Sod1	1
LEC.upregulated	LEC	upregulated	GO:0042743	hydrogen peroxide metabolic process	1	40/16955	0.002359	0.011766	NA	Sod1	1
LEC.upregulated	LEC	upregulated	GO:0060122	inner ear receptor cell stereocilium organization	1	40/16955	0.002359	0.011766	NA	Sod1	1
LEC.upregulated	LEC	upregulated	GO:0097237	cellular response to toxic substance	1	41/16955	0.002418	0.011766	NA	Sod1	1
LEC.upregulated	LEC	upregulated	GO:0008631	intrinsic apoptotic signaling pathway in response to oxidative stress	1	44/16955	0.002595	0.011766	NA	Sod1	1
LEC.upregulated	LEC	upregulated	GO:0006695	cholesterol biosynthetic process	1	46/16955	0.002713	0.011766	NA	Sod1	1
LEC.upregulated	LEC	upregulated	GO:0042491	inner ear auditory receptor cell differentiation	1	46/16955	0.002713	0.011766	NA	Sod1	1
LEC.upregulated	LEC	upregulated	GO:1902653	secondary alcohol biosynthetic process	1	46/16955	0.002713	0.011766	NA	Sod1	1
LEC.upregulated	LEC	upregulated	GO:0098754	detoxification	1	47/16955	0.002772	0.011766	NA	Sod1	1
LEC.upregulated	LEC	upregulated	GO:0051055	negative regulation of lipid biosynthetic process	1	49/16955	0.00289	0.011766	NA	Sod1	1
LEC.upregulated	LEC	upregulated	GO:0007566	embryo implantation	1	50/16955	0.002949	0.011766	NA	Sod1	1
LEC.upregulated	LEC	upregulated	GO:0008089	anterograde axonal transport	1	50/16955	0.002949	0.011766	NA	Sod1	1
LEC.upregulated	LEC	upregulated	GO:1902930	regulation of alcohol biosynthetic process	1	50/16955	0.002949	0.011766	NA	Sod1	1
LEC.upregulated	LEC	upregulated	GO:0001895	retina homeostasis	1	52/16955	0.003067	0.011766	NA	Sod1	1
LEC.upregulated	LEC	upregulated	GO:0016126	sterol biosynthetic process	1	52/16955	0.003067	0.011766	NA	Sod1	1
LEC.upregulated	LEC	upregulated	GO:0035315	hair cell differentiation	1	52/16955	0.003067	0.011766	NA	Sod1	1
LEC.upregulated	LEC	upregulated	GO:0006749	glutathione metabolic process	1	54/16955	0.003185	0.01179	NA	Sod1	1
LEC.upregulated	LEC	upregulated	GO:0006879	cellular iron ion homeostasis	1	54/16955	0.003185	0.01179	NA	Sod1	1
LEC.upregulated	LEC	upregulated	GO:0060119	inner ear receptor cell development	1	57/16955	0.003362	0.01203	NA	Sod1	1
LEC.upregulated	LEC	upregulated	GO:0006940	regulation of smooth muscle contraction	1	58/16955	0.003421	0.01203	NA	Sod1	1
LEC.upregulated	LEC	upregulated	GO:0045471	response to ethanol	1	58/16955	0.003421	0.01203	NA	Sod1	1
LEC.upregulated	LEC	upregulated	GO:0001541	ovarian follicle development	1	59/16955	0.00348	0.012037	NA	Sod1	1
LEC.upregulated	LEC	upregulated	GO:0098930	axonal transport	1	61/16955	0.003598	0.012244	NA	Sod1	1
LEC.upregulated	LEC	upregulated	GO:0006801	superoxide metabolic process	1	64/16955	0.003775	0.012256	NA	Sod1	1
LEC.upregulated	LEC	upregulated	GO:2001244	positive regulation of intrinsic apoptotic signaling pathway	1	64/16955	0.003775	0.012256	NA	Sod1	1
LEC.upregulated	LEC	upregulated	GO:0002066	columnar/cuboidal epithelial cell development	1	65/16955	0.003834	0.012256	NA	Sod1	1
LEC.upregulated	LEC	upregulated	GO:0048678	response to axon injury	1	65/16955	0.003834	0.012256	NA	Sod1	1
LEC.upregulated	LEC	upregulated	GO:0060563	neuroepithelial cell differentiation	1	67/16955	0.003952	0.012264	NA	Sod1	1
LEC.upregulated	LEC	upregulated	GO:0007422	peripheral nervous system development	1	68/16955	0.004011	0.012264	NA	Sod1	1
LEC.upregulated	LEC	upregulated	GO:0097755	positive regulation of blood vessel diameter	1	68/16955	0.004011	0.012264	NA	Sod1	1
LEC.upregulated	LEC	upregulated	GO:0050810	regulation of steroid biosynthetic process	1	69/16955	0.00407	0.012267	NA	Sod1	1
LEC.upregulated	LEC	upregulated	GO:0050766	positive regulation of phagocytosis	1	74/16955	0.004364	0.012604	NA	Sod1	1
LEC.upregulated	LEC	upregulated	GO:1903201	regulation of oxidative stress-induced cell death	1	74/16955	0.004364	0.012604	NA	Sod1	1
LEC.upregulated	LEC	upregulated	GO:0060113	inner ear receptor cell differentiation	1	76/16955	0.004482	0.012604	NA	Sod1	1
LEC.upregulated	LEC	upregulated	GO:0008088	axo-dendritic transport	1	79/16955	0.004659	0.012604	NA	Sod1	1
LEC.upregulated	LEC	upregulated	GO:0019226	transmission of nerve impulse	1	79/16955	0.004659	0.012604	NA	Sod1	1
LEC.upregulated	LEC	upregulated	GO:0040014	regulation of multicellular organism growth	1	79/16955	0.004659	0.012604	NA	Sod1	1
LEC.upregulated	LEC	upregulated	GO:0051881	regulation of mitochondrial membrane potential	1	79/16955	0.004659	0.012604	NA	Sod1	1
LEC.upregulated	LEC	upregulated	GO:0055072	iron ion homeostasis	1	79/16955	0.004659	0.012604	NA	Sod1	1
LEC.upregulated	LEC	upregulated	GO:0042490	mechanoreceptor differentiation	1	83/16955	0.004895	0.013075	NA	Sod1	1
LEC.upregulated	LEC	upregulated	GO:1900407	regulation of cellular response to oxidative stress	1	88/16955	0.00519	0.013507	NA	Sod1	1
LEC.upregulated	LEC	upregulated	GO:0009408	response to heat	1	89/16955	0.005249	0.013507	NA	Sod1	1
LEC.upregulated	LEC	upregulated	GO:0045833	negative regulation of lipid metabolic process	1	89/16955	0.005249	0.013507	NA	Sod1	1
LEC.upregulated	LEC	upregulated	GO:0046916	cellular transition metal ion homeostasis	1	91/16955	0.005367	0.01363	NA	Sod1	1
LEC.upregulated	LEC	upregulated	GO:0062014	negative regulation of small molecule metabolic process	1	92/16955	0.005426	0.01363	NA	Sod1	1
LEC.upregulated	LEC	upregulated	GO:0036473	cell death in response to oxidative stress	1	95/16955	0.005603	0.013783	NA	Sod1	1
LEC.upregulated	LEC	upregulated	GO:1902882	regulation of response to oxidative stress	1	96/16955	0.005662	0.013783	NA	Sod1	1
LEC.upregulated	LEC	upregulated	GO:0008585	female gonad development	1	97/16955	0.005721	0.013783	NA	Sod1	1
LEC.upregulated	LEC	upregulated	GO:0042472	inner ear morphogenesis	1	98/16955	0.00578	0.013783	NA	Sod1	1
LEC.upregulated	LEC	upregulated	GO:0019218	regulation of steroid metabolic process	1	99/16955	0.005839	0.013783	NA	Sod1	1
LEC.upregulated	LEC	upregulated	GO:0046545	development of primary female sexual characteristics	1	100/16955	0.005898	0.013783	NA	Sod1	1
LEC.upregulated	LEC	upregulated	GO:0006939	smooth muscle contraction	1	103/16955	0.006075	0.013783	NA	Sod1	1
LEC.upregulated	LEC	upregulated	GO:0007569	cell aging	1	103/16955	0.006075	0.013783	NA	Sod1	1
LEC.upregulated	LEC	upregulated	GO:0050764	regulation of phagocytosis	1	103/16955	0.006075	0.013783	NA	Sod1	1
LEC.upregulated	LEC	upregulated	GO:2000379	positive regulation of reactive oxygen species metabolic process	1	107/16955	0.006311	0.014096	NA	Sod1	1
LEC.upregulated	LEC	upregulated	GO:0007009	plasma membrane organization	1	108/16955	0.00637	0.014096	NA	Sod1	1
LEC.upregulated	LEC	upregulated	GO:0000187	activation of MAPK activity	1	110/16955	0.006488	0.014096	NA	Sod1	1
LEC.upregulated	LEC	upregulated	GO:0021782	glial cell development	1	110/16955	0.006488	0.014096	NA	Sod1	1
LEC.upregulated	LEC	upregulated	GO:0009636	response to toxic substance	1	111/16955	0.006547	0.014096	NA	Sod1	1
LEC.upregulated	LEC	upregulated	GO:0046660	female sex differentiation	1	114/16955	0.006724	0.014104	NA	Sod1	1
LEC.upregulated	LEC	upregulated	GO:0007565	female pregnancy	1	115/16955	0.006783	0.014104	NA	Sod1	1
LEC.upregulated	LEC	upregulated	GO:0042471	ear morphogenesis	1	117/16955	0.006901	0.014104	NA	Sod1	1
LEC.upregulated	LEC	upregulated	GO:0042542	response to hydrogen peroxide	1	117/16955	0.006901	0.014104	NA	Sod1	1
LEC.upregulated	LEC	upregulated	GO:1903409	reactive oxygen species biosynthetic process	1	117/16955	0.006901	0.014104	NA	Sod1	1
LEC.upregulated	LEC	upregulated	GO:0055076	transition metal ion homeostasis	1	118/16955	0.00696	0.014104	NA	Sod1	1
LEC.upregulated	LEC	upregulated	GO:0008203	cholesterol metabolic process	1	119/16955	0.007019	0.014104	NA	Sod1	1
LEC.upregulated	LEC	upregulated	GO:0002065	columnar/cuboidal epithelial cell differentiation	1	123/16955	0.007254	0.014441	NA	Sod1	1
LEC.upregulated	LEC	upregulated	GO:0016125	sterol metabolic process	1	128/16955	0.007549	0.014728	NA	Sod1	1
LEC.upregulated	LEC	upregulated	GO:0046165	alcohol biosynthetic process	1	128/16955	0.007549	0.014728	NA	Sod1	1
LEC.upregulated	LEC	upregulated	GO:1902652	secondary alcohol metabolic process	1	129/16955	0.007608	0.014728	NA	Sod1	1
LEC.upregulated	LEC	upregulated	GO:0035637	multicellular organismal signaling	1	133/16955	0.007844	0.015047	NA	Sod1	1
LEC.upregulated	LEC	upregulated	GO:0097305	response to alcohol	1	137/16955	0.00808	0.015164	NA	Sod1	1
LEC.upregulated	LEC	upregulated	GO:0044706	multi-multicellular organism process	1	140/16955	0.008257	0.015164	NA	Sod1	1
LEC.upregulated	LEC	upregulated	GO:0006694	steroid biosynthetic process	1	142/16955	0.008375	0.015164	NA	Sod1	1
LEC.upregulated	LEC	upregulated	GO:0050728	negative regulation of inflammatory response	1	142/16955	0.008375	0.015164	NA	Sod1	1
LEC.upregulated	LEC	upregulated	GO:0034614	cellular response to reactive oxygen species	1	143/16955	0.008434	0.015164	NA	Sod1	1
LEC.upregulated	LEC	upregulated	GO:0042552	myelination	1	143/16955	0.008434	0.015164	NA	Sod1	1
LEC.upregulated	LEC	upregulated	GO:0006937	regulation of muscle contraction	1	144/16955	0.008493	0.015164	NA	Sod1	1
LEC.upregulated	LEC	upregulated	GO:0007272	ensheathment of neurons	1	145/16955	0.008552	0.015164	NA	Sod1	1
LEC.upregulated	LEC	upregulated	GO:0008366	axon ensheathment	1	145/16955	0.008552	0.015164	NA	Sod1	1
LEC.upregulated	LEC	upregulated	GO:0007605	sensory perception of sound	1	149/16955	0.008788	0.015427	NA	Sod1	1
LEC.upregulated	LEC	upregulated	GO:0009266	response to temperature stimulus	1	150/16955	0.008847	0.015427	NA	Sod1	1
LEC.upregulated	LEC	upregulated	GO:0009913	epidermal cell differentiation	1	154/16955	0.009083	0.015556	NA	Sod1	1
LEC.upregulated	LEC	upregulated	GO:0006575	cellular modified amino acid metabolic process	1	155/16955	0.009142	0.015556	NA	Sod1	1
LEC.upregulated	LEC	upregulated	GO:0035296	regulation of tube diameter	1	159/16955	0.009378	0.015556	NA	Sod1	1
LEC.upregulated	LEC	upregulated	GO:0097746	regulation of blood vessel diameter	1	159/16955	0.009378	0.015556	NA	Sod1	1
LEC.upregulated	LEC	upregulated	GO:0010970	transport along microtubule	1	160/16955	0.009437	0.015556	NA	Sod1	1
LEC.upregulated	LEC	upregulated	GO:0035150	regulation of tube size	1	160/16955	0.009437	0.015556	NA	Sod1	1
LEC.upregulated	LEC	upregulated	GO:2001242	regulation of intrinsic apoptotic signaling pathway	1	160/16955	0.009437	0.015556	NA	Sod1	1
LEC.upregulated	LEC	upregulated	GO:0046890	regulation of lipid biosynthetic process	1	167/16955	0.00985	0.016111	NA	Sod1	1
LEC.upregulated	LEC	upregulated	GO:0043524	negative regulation of neuron apoptotic process	1	172/16955	0.010145	0.016435	NA	Sod1	1
LEC.upregulated	LEC	upregulated	GO:0002262	myeloid cell homeostasis	1	173/16955	0.010203	0.016435	NA	Sod1	1
LEC.upregulated	LEC	upregulated	GO:0008217	regulation of blood pressure	1	175/16955	0.010321	0.016468	NA	Sod1	1
LEC.upregulated	LEC	upregulated	GO:2001235	positive regulation of apoptotic signaling pathway	1	176/16955	0.01038	0.016468	NA	Sod1	1
LEC.upregulated	LEC	upregulated	GO:0050954	sensory perception of mechanical stimulus	1	179/16955	0.010557	0.016624	NA	Sod1	1
LEC.upregulated	LEC	upregulated	GO:0007568	aging	1	185/16955	0.010911	0.017011	NA	Sod1	1
LEC.upregulated	LEC	upregulated	GO:0048839	inner ear development	1	189/16955	0.011147	0.017011	NA	Sod1	1
LEC.upregulated	LEC	upregulated	GO:0030705	cytoskeleton-dependent intracellular transport	1	190/16955	0.011206	0.017011	NA	Sod1	1
LEC.upregulated	LEC	upregulated	GO:0035264	multicellular organism growth	1	190/16955	0.011206	0.017011	NA	Sod1	1
LEC.upregulated	LEC	upregulated	GO:0099111	microtubule-based transport	1	190/16955	0.011206	0.017011	NA	Sod1	1
LEC.upregulated	LEC	upregulated	GO:0000302	response to reactive oxygen species	1	193/16955	0.011383	0.017123	NA	Sod1	1
LEC.upregulated	LEC	upregulated	GO:0008406	gonad development	1	194/16955	0.011442	0.017123	NA	Sod1	1
LEC.upregulated	LEC	upregulated	GO:0045137	development of primary sexual characteristics	1	198/16955	0.011678	0.017231	NA	Sod1	1
LEC.upregulated	LEC	upregulated	GO:2000377	regulation of reactive oxygen species metabolic process	1	198/16955	0.011678	0.017231	NA	Sod1	1
LEC.upregulated	LEC	upregulated	GO:0003018	vascular process in circulatory system	1	204/16955	0.012032	0.017594	NA	Sod1	1
LEC.upregulated	LEC	upregulated	GO:1901617	organic hydroxy compound biosynthetic process	1	205/16955	0.012091	0.017594	NA	Sod1	1
LEC.upregulated	LEC	upregulated	GO:0060047	heart contraction	1	208/16955	0.012268	0.017729	NA	Sod1	1
LEC.upregulated	LEC	upregulated	GO:0031348	negative regulation of defense response	1	210/16955	0.012386	0.017778	NA	Sod1	1
LEC.upregulated	LEC	upregulated	GO:0043406	positive regulation of MAP kinase activity	1	214/16955	0.012622	0.017967	NA	Sod1	1
LEC.upregulated	LEC	upregulated	GO:0043583	ear development	1	216/16955	0.01274	0.017967	NA	Sod1	1
LEC.upregulated	LEC	upregulated	GO:0003015	heart process	1	217/16955	0.012799	0.017967	NA	Sod1	1
LEC.upregulated	LEC	upregulated	GO:0042493	response to drug	1	218/16955	0.012858	0.017967	NA	Sod1	1
LEC.upregulated	LEC	upregulated	GO:0006909	phagocytosis	1	221/16955	0.013035	0.018094	NA	Sod1	1
LEC.upregulated	LEC	upregulated	GO:0007626	locomotory behavior	1	225/16955	0.01327	0.018182	NA	Sod1	1
LEC.upregulated	LEC	upregulated	GO:0032147	activation of protein kinase activity	1	225/16955	0.01327	0.018182	NA	Sod1	1
LEC.upregulated	LEC	upregulated	GO:0010001	glial cell differentiation	1	228/16955	0.013447	0.018237	NA	Sod1	1
LEC.upregulated	LEC	upregulated	GO:0090257	regulation of muscle system process	1	230/16955	0.013565	0.018237	NA	Sod1	1
LEC.upregulated	LEC	upregulated	GO:0002064	epithelial cell development	1	232/16955	0.013683	0.018237	NA	Sod1	1
LEC.upregulated	LEC	upregulated	GO:1901215	negative regulation of neuron death	1	232/16955	0.013683	0.018237	NA	Sod1	1
LEC.upregulated	LEC	upregulated	GO:0001894	tissue homeostasis	1	233/16955	0.013742	0.018237	NA	Sod1	1
LEC.upregulated	LEC	upregulated	GO:0007548	sex differentiation	1	243/16955	0.014332	0.0189	NA	Sod1	1
LEC.upregulated	LEC	upregulated	GO:0010038	response to metal ion	1	253/16955	0.014922	0.019512	NA	Sod1	1
LEC.upregulated	LEC	upregulated	GO:0008544	epidermis development	1	254/16955	0.014981	0.019512	NA	Sod1	1
LEC.upregulated	LEC	upregulated	GO:0043523	regulation of neuron apoptotic process	1	258/16955	0.015217	0.019654	NA	Sod1	1
LEC.upregulated	LEC	upregulated	GO:0006790	sulfur compound metabolic process	1	259/16955	0.015276	0.019654	NA	Sod1	1
LEC.upregulated	LEC	upregulated	GO:0008202	steroid metabolic process	1	263/16955	0.015512	0.019778	NA	Sod1	1
LEC.upregulated	LEC	upregulated	GO:0072593	reactive oxygen species metabolic process	1	266/16955	0.015689	0.019778	NA	Sod1	1
LEC.upregulated	LEC	upregulated	GO:0034599	cellular response to oxidative stress	1	267/16955	0.015748	0.019778	NA	Sod1	1
LEC.upregulated	LEC	upregulated	GO:0090596	sensory organ morphogenesis	1	267/16955	0.015748	0.019778	NA	Sod1	1
LEC.upregulated	LEC	upregulated	GO:0071902	positive regulation of protein serine/threonine kinase activity	1	275/16955	0.016219	0.020086	NA	Sod1	1
LEC.upregulated	LEC	upregulated	GO:0006936	muscle contraction	1	276/16955	0.016278	0.020086	NA	Sod1	1
LEC.upregulated	LEC	upregulated	GO:0048562	embryonic organ morphogenesis	1	276/16955	0.016278	0.020086	NA	Sod1	1
LEC.upregulated	LEC	upregulated	GO:0097193	intrinsic apoptotic signaling pathway	1	282/16955	0.016632	0.020404	NA	Sod1	1
LEC.upregulated	LEC	upregulated	GO:0051402	neuron apoptotic process	1	284/16955	0.01675	0.020409	NA	Sod1	1
LEC.upregulated	LEC	upregulated	GO:0043405	regulation of MAP kinase activity	1	286/16955	0.016868	0.020409	NA	Sod1	1
LEC.upregulated	LEC	upregulated	GO:0031667	response to nutrient levels	1	287/16955	0.016927	0.020409	NA	Sod1	1
LEC.upregulated	LEC	upregulated	GO:0006066	alcohol metabolic process	1	293/16955	0.017281	0.020718	NA	Sod1	1
LEC.upregulated	LEC	upregulated	GO:0043087	regulation of GTPase activity	1	296/16955	0.017458	0.020811	NA	Sod1	1
LEC.upregulated	LEC	upregulated	GO:0048872	homeostasis of number of cells	1	306/16955	0.018048	0.021394	NA	Sod1	1
LEC.upregulated	LEC	upregulated	GO:0062197	cellular response to chemical stress	1	309/16955	0.018225	0.021483	NA	Sod1	1
LEC.upregulated	LEC	upregulated	GO:0042063	gliogenesis	1	311/16955	0.018343	0.021502	NA	Sod1	1
LEC.upregulated	LEC	upregulated	GO:0009991	response to extracellular stimulus	1	316/16955	0.018638	0.021727	NA	Sod1	1
LEC.upregulated	LEC	upregulated	GO:0062012	regulation of small molecule metabolic process	1	331/16955	0.019522	0.022577	NA	Sod1	1
LEC.upregulated	LEC	upregulated	GO:0019216	regulation of lipid metabolic process	1	332/16955	0.019581	0.022577	NA	Sod1	1
LEC.upregulated	LEC	upregulated	GO:0050727	regulation of inflammatory response	1	336/16955	0.019817	0.022725	NA	Sod1	1
LEC.upregulated	LEC	upregulated	GO:0032102	negative regulation of response to external stimulus	1	351/16955	0.020702	0.023611	NA	Sod1	1
LEC.upregulated	LEC	upregulated	GO:1901214	regulation of neuron death	1	355/16955	0.020938	0.023692	NA	Sod1	1
LEC.upregulated	LEC	upregulated	GO:0007018	microtubule-based movement	1	356/16955	0.020997	0.023692	NA	Sod1	1
LEC.upregulated	LEC	upregulated	GO:0048638	regulation of developmental growth	1	372/16955	0.02194	0.024625	NA	Sod1	1
LEC.upregulated	LEC	upregulated	GO:0003012	muscle system process	1	381/16955	0.022471	0.025087	NA	Sod1	1
LEC.upregulated	LEC	upregulated	GO:0060249	anatomical structure homeostasis	1	388/16955	0.022884	0.025343	NA	Sod1	1
LEC.upregulated	LEC	upregulated	GO:0006979	response to oxidative stress	1	391/16955	0.023061	0.025343	NA	Sod1	1
LEC.upregulated	LEC	upregulated	GO:0070997	neuron death	1	391/16955	0.023061	0.025343	NA	Sod1	1
LEC.upregulated	LEC	upregulated	GO:2001233	regulation of apoptotic signaling pathway	1	394/16955	0.023238	0.025405	NA	Sod1	1
LEC.upregulated	LEC	upregulated	GO:0010256	endomembrane system organization	1	398/16955	0.023474	0.025531	NA	Sod1	1
LEC.upregulated	LEC	upregulated	GO:0048608	reproductive structure development	1	408/16955	0.024064	0.025969	NA	Sod1	1
LEC.upregulated	LEC	upregulated	GO:0001819	positive regulation of cytokine production	1	409/16955	0.024123	0.025969	NA	Sod1	1
LEC.upregulated	LEC	upregulated	GO:0061458	reproductive system development	1	412/16955	0.0243	0.026026	NA	Sod1	1
LEC.upregulated	LEC	upregulated	GO:0045860	positive regulation of protein kinase activity	1	415/16955	0.024477	0.026084	NA	Sod1	1
LEC.upregulated	LEC	upregulated	GO:0071900	regulation of protein serine/threonine kinase activity	1	419/16955	0.024712	0.026203	NA	Sod1	1
LEC.upregulated	LEC	upregulated	GO:0042391	regulation of membrane potential	1	422/16955	0.024889	0.026258	NA	Sod1	1
LEC.upregulated	LEC	upregulated	GO:0010035	response to inorganic substance	1	425/16955	0.025066	0.026313	NA	Sod1	1
LEC.upregulated	LEC	upregulated	GO:0007283	spermatogenesis	1	438/16955	0.025833	0.026912	NA	Sod1	1
LEC.upregulated	LEC	upregulated	GO:0048568	embryonic organ development	1	439/16955	0.025892	0.026912	NA	Sod1	1
LEC.upregulated	LEC	upregulated	GO:0009611	response to wounding	1	442/16955	0.026069	0.026964	NA	Sod1	1
LEC.upregulated	LEC	upregulated	GO:1901615	organic hydroxy compound metabolic process	1	447/16955	0.026364	0.027136	NA	Sod1	1
LEC.upregulated	LEC	upregulated	GO:0048232	male gamete generation	1	458/16955	0.027013	0.027655	NA	Sod1	1
LEC.upregulated	LEC	upregulated	GO:0008015	blood circulation	1	460/16955	0.027131	0.027655	NA	Sod1	1
LEC.upregulated	LEC	upregulated	GO:0048871	multicellular organismal homeostasis	1	468/16955	0.027602	0.028001	NA	Sod1	1
LEC.upregulated	LEC	upregulated	GO:0003013	circulatory system process	1	479/16955	0.028251	0.028522	NA	Sod1	1
LEC.upregulated	LEC	upregulated	GO:0043410	positive regulation of MAPK cascade	1	483/16955	0.028487	0.028546	NA	Sod1	1
LEC.upregulated	LEC	upregulated	GO:0033674	positive regulation of kinase activity	1	484/16955	0.028546	0.028546	NA	Sod1	1
MAC.upregulated	MAC	upregulated	GO:0030198	extracellular matrix organization	0.181818	280/16955	1.46e-05	0.008998	0.006705	Mfap4/Fbln2/Ccdc80/Lum/Dpt/Mmp2	6
MAC.upregulated	MAC	upregulated	GO:0043062	extracellular structure organization	0.181818	281/16955	1.49e-05	0.008998	0.006705	Mfap4/Fbln2/Ccdc80/Lum/Dpt/Mmp2	6
MAC.upregulated	MAC	upregulated	GO:0051897	positive regulation of protein kinase B signaling	0.121212	102/16955	4.42e-05	0.01436	0.0107	Hsp90ab1/Gdf15/Igfbp5/Hsp90aa1	4
MAC.upregulated	MAC	upregulated	GO:0032963	collagen metabolic process	0.121212	104/16955	4.77e-05	0.01436	0.0107	Mfap4/Ctsl/Vim/Mmp2	4
MAC.upregulated	MAC	upregulated	GO:0006457	protein folding	0.121212	148/16955	0.000187	0.039246	0.029244	Hsp90ab1/Ppia/Hspa8/Hsp90aa1	4
MAC.upregulated	MAC	upregulated	GO:0099558	maintenance of synapse structure	0.0606061	11/16955	0.0002	0.039246	0.029244	Chchd10/Hspa8	2
MAC.upregulated	MAC	upregulated	GO:0051896	regulation of protein kinase B signaling	0.121212	156/16955	0.000229	0.039246	0.029244	Hsp90ab1/Gdf15/Igfbp5/Hsp90aa1	4
MAC.upregulated	MAC	upregulated	GO:0061564	axon development	0.181818	471/16955	0.000261	0.039246	0.029244	Vim/Gas1/Hsp90ab1/Mmp2/Actb/Hsp90aa1	6
MAC.upregulated	MAC	upregulated	GO:0051222	positive regulation of protein transport	0.151515	330/16955	0.000411	0.047443	0.035352	Ankrd1/Hsp90ab1/Ppia/Gapdh/Hsp90aa1	5
MAC.upregulated	MAC	upregulated	GO:0043491	protein kinase B signaling	0.121212	185/16955	0.000438	0.047443	0.035352	Hsp90ab1/Gdf15/Igfbp5/Hsp90aa1	4
MAC.upregulated	MAC	upregulated	GO:0045793	positive regulation of cell size	0.0606061	17/16955	0.000491	0.047443	0.035352	Hsp90ab1/Hsp90aa1	2
MAC.upregulated	MAC	upregulated	GO:1904951	positive regulation of establishment of protein localization	0.151515	346/16955	0.00051	0.047443	0.035352	Ankrd1/Hsp90ab1/Ppia/Gapdh/Hsp90aa1	5
MAC.upregulated	MAC	upregulated	GO:0042026	protein refolding	0.0606061	18/16955	0.000551	0.047443	0.035352	Hspa8/Hsp90aa1	2
MAC.upregulated	MAC	upregulated	GO:0051131	chaperone-mediated protein complex assembly	0.0606061	18/16955	0.000551	0.047443	0.035352	Hsp90ab1/Hsp90aa1	2
MES.upregulated	MES	upregulated	GO:0018149	peptide cross-linking	1	23/16955	0.001357	0.005898	NA	Bgn	1
MES.upregulated	MES	upregulated	GO:0030204	chondroitin sulfate metabolic process	1	23/16955	0.001357	0.005898	NA	Bgn	1
MES.upregulated	MES	upregulated	GO:0050654	chondroitin sulfate proteoglycan metabolic process	1	30/16955	0.001769	0.005898	NA	Bgn	1
MES.upregulated	MES	upregulated	GO:1903510	mucopolysaccharide metabolic process	1	60/16955	0.003539	0.007667	NA	Bgn	1
MES.upregulated	MES	upregulated	GO:0006029	proteoglycan metabolic process	1	71/16955	0.004188	0.007667	NA	Bgn	1
MES.upregulated	MES	upregulated	GO:0030203	glycosaminoglycan metabolic process	1	78/16955	0.0046	0.007667	NA	Bgn	1
MES.upregulated	MES	upregulated	GO:0006022	aminoglycan metabolic process	1	97/16955	0.005721	0.008173	NA	Bgn	1
MES.upregulated	MES	upregulated	GO:0006790	sulfur compound metabolic process	1	259/16955	0.015276	0.01852	NA	Bgn	1
MES.upregulated	MES	upregulated	GO:0009100	glycoprotein metabolic process	1	314/16955	0.01852	0.01852	NA	Bgn	1
MES.upregulated	MES	upregulated	GO:0018209	peptidyl-serine modification	1	314/16955	0.01852	0.01852	NA	Bgn	1
PC.upregulated	PC	upregulated	GO:0097278	complement-dependent cytotoxicity	0.117647	10/16955	4.24e-05	0.026699	0.018826	Hsp90ab1/Cfh	2
PC.upregulated	PC	upregulated	GO:0031341	regulation of cell killing	0.176471	96/16955	0.000113	0.030117	0.021235	Hsp90ab1/Cfh/Hspa8	3
PC.upregulated	PC	upregulated	GO:0042026	protein refolding	0.117647	18/16955	0.000143	0.030117	0.021235	Hspa8/Hspa9	2
PC.upregulated	PC	upregulated	GO:0000027	ribosomal large subunit assembly	0.117647	28/16955	0.000352	0.034187	0.024105	Rpl12/Rpl6	2
PC.upregulated	PC	upregulated	GO:0051085	chaperone cofactor-dependent protein refolding	0.117647	29/16955	0.000378	0.034187	0.024105	Hspa8/Hspa9	2
PC.upregulated	PC	upregulated	GO:0006457	protein folding	0.176471	148/16955	0.000405	0.034187	0.024105	Hsp90ab1/Hspa8/Hspa9	3
PC.upregulated	PC	upregulated	GO:0001906	cell killing	0.176471	152/16955	0.000438	0.034187	0.024105	Hsp90ab1/Cfh/Hspa8	3
PC.upregulated	PC	upregulated	GO:0006458	de novo' protein folding	0.117647	34/16955	0.000521	0.034187	0.024105	Hspa8/Hspa9	2
PC.upregulated	PC	upregulated	GO:0051084	de novo' posttranslational protein folding	0.117647	34/16955	0.000521	0.034187	0.024105	Hspa8/Hspa9	2
PC.upregulated	PC	upregulated	GO:0071897	DNA biosynthetic process	0.176471	164/16955	0.000547	0.034187	0.024105	Ankrd1/Ccn2/Hsp90ab1	3
PC.upregulated	PC	upregulated	GO:0022618	ribonucleoprotein complex assembly	0.176471	169/16955	0.000597	0.034187	0.024105	Hsp90ab1/Rpl12/Rpl6	3
PC.upregulated	PC	upregulated	GO:0071826	ribonucleoprotein complex subunit organization	0.176471	176/16955	0.000672	0.035268	0.024867	Hsp90ab1/Rpl12/Rpl6	3

## Sheet: ST4
lr.cell.name	lr.gene.name	obs.xy.diff	null.diff.sd	pvalue	adj.p	Welch.t.stat	Welch.t.sd	Welch.t.p	Welch.t.adj.p	WRS.p	WRS.adj.p	bntest.p	bntest.adj.p	limma.Lg.p	limma.Rg.p	limma.Lg.logFC	limma.Rg.logFC	limma.Lg.adj.p	limma.Rg.adj.p
FB-FB	SP1-GDF15	-59.518	10.2148	2.86e-06	0.00195537	-4.7615	12.4998	0.0174	0.912738	0.028571	0.805685	1	1	0.753498	0.000438574	0.0878	-6.8112	0.983861	0.214551
FB-FB	MYB-GATA3	5.0421	1.0453	9.73e-05	0.0360587	3.6644	1.376	0.034001	0.912738	0.028571	0.805685	1	1	0.000151875	0.14021	1.5787	-0.9218	0.140107	0.963808
FB-FB	EP300-MYB	15.1241	2.1554	3.93e-10	1.03e-06	8.6918	1.74	0.002179	0.866801	0.028571	0.805685	0.88	1	0.914904	0.000151875	0.02	1.5787	0.995165	0.140107
FB-FB	CREBBP-MYB	17.8502	2.542	3.56e-08	4.77e-05	9.0753	1.9669	0.001816	0.833826	0.028571	0.805685	1	1	0.504064	0.000151875	0.1859	1.5787	0.978962	0.140107
FB-FB	MYB-COL1A2	18.4655	2.7517	3.4e-09	6.53e-06	8.7066	2.1209	0.002279	0.874161	0.028571	0.805685	0.3	0.789097	0.000151875	0.542221	1.5787	-0.2116	0.140107	0.978962
FB-FB	MYB-COL1A1	17.0194	2.6005	2.51e-07	0.000251868	8.5959	1.9799	0.002506	0.895679	0.028571	0.805685	0.92	1	0.000151875	0.47414	1.5787	-0.4177	0.140107	0.978962
FB-FB	NLK-MYB	15.8214	2.3271	7.54e-08	9.07e-05	9.3517	1.6918	0.001616	0.814054	0.028571	0.805685	0.88	1	0.352014	0.000151875	0.2837	1.5787	0.978962	0.140107
FB-FB	TRAF6-MYB	11.7977	1.7669	1.73e-08	2.57e-05	8.3959	1.4052	0.002264	0.874161	0.028571	0.805685	1	1	0.556498	0.000151875	-0.1664	1.5787	0.97932	0.140107
FB-FB	AURKB-INCENP	-14.1178	2.91	0.000104952	0.0382794	-3.8745	3.6438	0.012572	0.912738	0.028571	0.805685	1	1	0.00282281	0.0289465	-2.4592	-1.0301	0.461643	0.927927
FB-FB	INCENP-AURKB	-14.1178	2.8499	1.65e-05	0.00838469	-3.8745	3.6438	0.012572	0.912738	0.028571	0.805685	1	1	0.0289465	0.00282281	-1.0301	-2.4592	0.927927	0.461643
FB-FB	AURKB-KIF23	-12.3677	2.2524	6.77e-06	0.00399189	-4.5429	2.7224	0.012354	0.912738	0.028571	0.805685	1	1	0.00282281	0.00467021	-2.4592	-1.805	0.461643	0.551601
FB-FB	AURKB-RACGAP1	-12.3755	2.3178	3.08e-06	0.00207865	-4.0654	3.0441	0.013126	0.912738	0.028571	0.805685	0.78	1	0.00282281	0.00804186	-2.4592	-1.2594	0.461643	0.661625
FB-FB	OSTN-NPR3	-46.8871	8.6783	4.01e-05	0.0175377	-3.2416	14.4642	0.047667	0.912738	0.028571	0.805685	0.32	0.807536	6.51e-05	0.639562	-5.4378	-0.7876	0.0978244	0.980026
FB-FB	GDF15-ERBB2	-38.0391	7.0857	9.92e-06	0.00548856	-4.3108	8.8242	0.022789	0.912738	0.028571	0.805685	0.88	1	0.000438574	0.294178	-6.8112	0.3782	0.214551	0.978962
FB-FB	LFNG-NOTCH2	-17.3249	2.9334	3.7e-08	4.92e-05	-5.2177	3.3204	0.002119	0.863361	0.028571	0.805685	0.08	0.450284	0.00127534	0.19637	-1.9549	0.3089	0.342913	0.966616
FB-FB	AURKB-CHMP4C	-14.7425	3.2797	8.4e-05	0.0320357	-3.524	4.1835	0.013343	0.912738	0.028571	0.805685	0.02	0.195524	0.00282281	0.230074	-2.4592	-0.4613	0.461643	0.971061
FB-FB	SARM1-TICAM1	9.84	1.9522	5.92e-05	0.0241056	6.6428	1.4813	0.002434	0.889334	0.026519	0.805685	0.2	0.676998	0.000319839	0.613885	2.1716	0.3794	0.187307	0.979433
FB-FB	MAF-MYB	12.3523	2.4694	8.61e-05	0.0326608	5.8214	2.1219	0.009977	0.912738	0.028571	0.805685	1	1	0.9538	0.000151875	0.0855	1.5787	0.997893	0.140107
FB-FB	CSNK2A2-AQP4	19.1286	3.1244	2.88e-07	0.000282876	6.0317	3.1713	0.001381	0.785448	0.026519	0.805685	0.2	0.676998	0.448422	0.000334854	-0.1583	2.2671	0.978962	0.190969
FB-FB	NCL-MYB	14.2055	2.2	4.05e-08	5.31e-05	8.4821	1.6748	0.002443	0.890027	0.028571	0.805685	1	1	0.230955	0.000151875	-0.5173	1.5787	0.97109	0.140107
FB-FB	MAPK3-MYB	10.467	1.8618	4.21e-06	0.00269349	9.4286	1.1101	0.00213	0.864263	0.028571	0.805685	1	1	0.797294	0.000151875	-0.2052	1.5787	0.986704	0.140107
FB-FB	MAPK1-MYB	15.3765	2.2232	2.62e-09	5.25e-06	9.228	1.6663	0.001693	0.822382	0.028571	0.805685	1	1	0.688446	0.000151875	0.0841	1.5787	0.981022	0.140107
FB-FB	CSNK2A1-MYB	15.0192	2.1263	5.48e-08	6.91e-05	9.0217	1.6648	0.001944	0.847365	0.028571	0.805685	0.46	0.917918	0.767788	0.000151875	0.0591	1.5787	0.984537	0.140107
FB-FB	CSNK2A1-AQP4	21.589	3.4968	9.74e-07	0.000779126	6.0157	3.5888	0.001422	0.792357	0.026519	0.805685	0.46	0.917918	0.767788	0.000334854	0.0591	2.2671	0.984537	0.190969
FB-FB	ELAVL2-ADAM10	-26.2082	4.6864	1.14e-05	0.00617991	-5.2329	5.0084	0.009511	0.912738	0.028571	0.805685	1	1	0.00063434	0.468797	-2.7036	-0.16	0.257228	0.978962
FB-FB	GDF15-RET	-53.3779	9.6367	7.98e-06	0.00457882	-5.3331	10.0088	0.012671	0.912738	0.028571	0.805685	0.18	0.649903	0.000438574	0.115908	-6.8112	0.5777	0.214551	0.963808
FB-FB	FGFR1-FGF7	16.12	2.8528	3.32e-07	0.000319705	11.4549	1.4073	0.000141	0.493778	0.028571	0.805685	1	1	0.575299	0.000131129	0.1503	1.3948	0.979433	0.135025
FB-FB	FGF7-FGFR1	16.12	2.8201	1.74e-07	0.000184733	11.4549	1.4073	0.000141	0.493778	0.028571	0.805685	1	1	0.000131129	0.575299	1.3948	0.1503	0.135025	0.979433
FB-FB	LAMC3-ITGA3	-11.8983	2.4428	6.62e-05	0.026444	-6.1084	1.9478	0.001155	0.75554	0.028571	0.805685	0.12	0.539527	0.0529531	0.0026591	-0.5582	-1.8037	0.963808	0.452758
FB-FB	GDF15-TGFBR2	-69.5069	11.8617	1.87e-06	0.00135724	-4.9775	13.9643	0.015405	0.912738	0.028571	0.805685	1	1	0.000438574	0.843443	-6.8112	-0.0497	0.214551	0.989911
FB-FB	CHEK2-AURKB	-15.3298	3.2343	0.000111567	0.0402158	-5.0066	3.0619	0.002636	0.906455	0.028571	0.805685	0.6	1	0.0471996	0.00282281	-0.6354	-2.4592	0.963808	0.461643
FB-FB	AURKB-DEK	-21.0977	4.6308	0.000120276	0.0425956	-3.6787	5.735	0.010447	0.912738	0.028571	0.805685	1	1	0.00282281	0.821656	-2.4592	-0.0823	0.461643	0.988433
FB-FB	PRKCA-AQP4	26.3036	4.2786	6.83e-07	0.000580132	6.2173	4.2307	0.001192	0.762335	0.026519	0.805685	0.38	0.852867	0.711997	0.000334854	0.1412	2.2671	0.981933	0.190969
FB-FB	MAPK8-SARM1	19.4538	3.2112	8.62e-07	0.000702791	6.2239	3.1256	0.003999	0.912738	0.026519	0.805685	0.18	0.649903	0.680434	0.000319839	0.1222	2.1716	0.981006	0.187307
FB-FB	AURKA-SPAG5	-7.6246	1.5619	6.93e-05	0.0274227	-3.396	2.2452	0.039725	0.912738	0.028571	0.805685	0.96	1	0.00445218	0.00406245	-2.0727	-1.7547	0.543296	0.527455
FB-FB	PRKACA-AQP4	16.73	2.7755	7.39e-07	0.000617288	5.5979	2.9886	0.002008	0.852701	0.026519	0.805685	0.18	0.649903	0.901987	0.000334854	0.0573	2.2671	0.994202	0.190969
FB-FB	CDK2-MYB	8.6375	1.3059	4.4e-07	0.000403478	7.6711	1.126	0.003293	0.912738	0.028571	0.805685	1	1	0.446996	0.000151875	-0.1808	1.5787	0.978962	0.140107
FB-FB	CSNK1E-MYB	12.818	1.917	6.73e-08	8.22e-05	8.532	1.5023	0.002405	0.887197	0.028571	0.805685	0.9	1	0.709219	0.000151875	0.0868	1.5787	0.981933	0.140107
FB-FB	CSNK2A2-MYB	13.275	1.9793	1.01e-08	1.64e-05	9.0467	1.4674	0.00175	0.82905	0.028571	0.805685	0.54	0.967114	0.448422	0.000151875	-0.1583	1.5787	0.978962	0.140107
FB-FB	GSK3B-MYB	16.9646	2.5055	9.12e-09	1.5e-05	8.9754	1.8901	0.00188	0.840115	0.028571	0.805685	0.48	0.9325	0.922235	0.000151875	-0.0215	1.5787	0.995237	0.140107
FB-FB	MAPK14-MYB	15.0881	2.2497	1.39e-08	2.14e-05	8.8348	1.7078	0.002137	0.864263	0.028571	0.805685	1	1	0.0474511	0.000151875	0.4539	1.5787	0.963808	0.140107
FB-FB	PRKDC-AQP4	20.2217	3.3557	4.23e-06	0.00270146	6.2723	3.224	0.001092	0.745346	0.026519	0.805685	1	1	0.313038	0.000334854	0.2408	2.2671	0.978962	0.190969
FB-FB	PRKACA-MYB	11.7235	1.7821	1.16e-07	0.000130923	8.512	1.3773	0.002651	0.908107	0.028571	0.805685	0.98	1	0.901987	0.000151875	0.0573	1.5787	0.994202	0.140107
FB-FB	AURKA-AURKB	-8.4928	1.7847	9.79e-05	0.0362252	-3.8542	2.2035	0.026234	0.912738	0.029401	0.805685	0.18	0.649903	0.00445218	0.00282281	-2.0727	-2.4592	0.543296	0.461643
FB-FB	UBE2I-MYB	12.8716	1.9622	6.24e-08	7.7e-05	9.4656	1.3598	0.001513	0.802362	0.028571	0.805685	0.7	1	0.293917	0.000151875	-0.2159	1.5787	0.978962	0.140107
FB-FB	HIPK2-MYB	13.5131	1.88	8.67e-10	2.02e-06	10.2129	1.3231	0.001206	0.764432	0.028571	0.805685	1	1	0.702155	0.000151875	0.1016	1.5787	0.981235	0.140107
FB-FB	MYB-CEBPB	10.2425	2.1991	0.000108252	0.0392183	9.5678	1.0705	0.002318	0.877778	0.028571	0.805685	1	1	0.000151875	0.977545	1.5787	-0.04	0.140107	0.999242
FB-FB	FBXW7-MYB	14.9166	2.1722	2.05e-08	2.97e-05	9.0184	1.654	0.001995	0.851748	0.028571	0.805685	1	1	0.213275	0.000151875	0.2971	1.5787	0.969135	0.140107
FB-CM	ATAD2-MYC	-44.1412	7.8049	6.36e-07	0.000545301	-5.4141	8.153	0.004547	0.912738	0.028571	0.805685	0.76	1	0.13075	0.000695076	-0.3944	-5.46	0.963808	0.267714
FB-CM	CDK2-MYC	-31.2283	5.6881	7.15e-06	0.00417174	-4.9479	6.3115	0.006524	0.912738	0.028571	0.805685	0.34	0.822069	0.446996	0.000695076	-0.1808	-5.46	0.978962	0.267714
FB-CM	HBP1-MYC	-47.5089	8.7736	3.3e-06	0.00220511	-4.7694	9.9611	0.006145	0.912738	0.028571	0.805685	0.98	1	0.955626	0.000695076	0.0132	-5.46	0.998026	0.267714
FB-CM	TRRAP-MYC	-47.6386	9.0514	5.03e-05	0.0211328	-5.1803	9.1961	0.009811	0.912738	0.028571	0.805685	0.48	0.9325	0.986204	0.000695076	-0.0045	-5.46	0.999274	0.267714
FB-CM	FBXW7-MYC	-48.8327	9.7266	2.59e-05	0.0121796	-4.8415	10.0863	0.010119	0.912738	0.028571	0.805685	0.92	1	0.213275	0.000695076	0.2971	-5.46	0.969135	0.267714
FB-CM	BCL2L2-BIK	13.9264	2.5998	1.13e-05	0.00610416	6.3737	2.185	0.003808	0.912738	0.028571	0.805685	0.02	0.195524	0.776596	0.000188707	0.0582	2.0777	0.984702	0.149515
FB-CM	PUF60-MYC	-39.6702	7.608	9.81e-05	0.036305	-3.9599	10.0181	0.007473	0.912738	0.028571	0.805685	0.4	0.869191	0.86238	0.000695076	-0.0918	-5.46	0.990276	0.267714
FB-CM	FUBP1-MYC	-55.5155	10.0929	1.3e-05	0.006905	-5.1458	10.7885	0.009505	0.912738	0.028571	0.805685	0.74	1	0.946058	0.000695076	0.0163	-5.46	0.997081	0.267714
FB-CM	AXIN1-MYC	-44.9305	8.7073	2.2e-05	0.0106091	-5.0786	8.847	0.011344	0.912738	0.028571	0.805685	0.44	0.903094	0.495736	0.000695076	0.1908	-5.46	0.978962	0.267714
FB-CM	GSK3B-MYC	-58.7744	10.5944	7.24e-06	0.00421715	-5.1667	11.3757	0.008328	0.912738	0.028571	0.805685	0.34	0.822069	0.922235	0.000695076	-0.0215	-5.46	0.995237	0.267714
FB-CM	SP1-GDF15	-63.2586	6.8627	0	0	-9.8618	6.4145	0.002168	0.865665	0.028571	0.805685	1	1	0.753498	1.55e-05	0.0878	-7.3819	0.983861	0.0580768
FB-CM	MYB-COL1A2	14.5996	2.6465	5.69e-06	0.00345549	5.4604	2.6737	0.012043	0.912738	0.028571	0.805685	1	1	0.000151875	0.0574511	1.5787	3.9815	0.140107	0.963808
FB-CM	MYB-COL1A1	12.6558	2.519	8.32e-05	0.0318001	5.2431	2.4138	0.013466	0.912738	0.028571	0.805685	1	1	0.000151875	0.102265	1.5787	3.098	0.140107	0.963808
FB-CM	NLK-MYB	15.4747	3.1273	3.95e-05	0.0173246	5.5123	2.8073	0.004281	0.912738	0.026519	0.805685	0.38	0.852867	0.352014	0.0013296	0.2837	1.5503	0.978962	0.34682
FB-CM	COPS5-MYC	-46.8745	8.5247	6.68e-06	0.00395118	-5.189	9.0334	0.004974	0.912738	0.028571	0.805685	0.36	0.838242	0.147472	0.000695076	-0.3479	-5.46	0.963808	0.267714
FB-CM	KAT5-MYC	-31.8183	6.0593	1.48e-05	0.00764173	-4.8392	6.5752	0.004823	0.912738	0.028571	0.805685	0.14	0.580719	0.953857	0.000695076	0.0189	-5.46	0.997893	0.267714
FB-CM	SMARCB1-MYC	-44.8717	8.32	2.92e-05	0.0134301	-5.049	8.8873	0.005751	0.912738	0.028571	0.805685	0.66	1	0.676034	0.000695076	-0.1071	-5.46	0.980642	0.267714
FB-CM	CDC73-MYC	-52.2105	9.2594	4.4e-06	0.0027911	-5.0453	10.3482	0.009157	0.912738	0.028571	0.805685	0.24	0.729859	0.796946	0.000695076	0.0528	-5.46	0.986704	0.267714
FB-CM	SIRT1-SUV39H1	30.0839	5.6993	1.04e-05	0.00572371	5.0811	5.9207	0.011753	0.912738	0.028571	0.805685	0.32	0.807536	0.70088	0.000673608	-0.0829	4.0515	0.981188	0.265524
FB-CM	EIF2AK3-SLC7A1	-22.4844	4.6412	3.57e-05	0.0159556	-4.7368	4.7467	0.015831	0.912738	0.028571	0.805685	1	1	0.571385	4.37e-05	0.1887	-2.6426	0.979433	0.0795503
FB-CM	JAK2-PRLR	25.1856	4.6649	1.75e-05	0.00880107	5.5592	4.5305	0.003607	0.912738	0.028571	0.805685	0.34	0.822069	0.592658	0.00045182	0.1423	2.6281	0.979433	0.217937
FB-CM	PAF1-SUV39H1	25.4986	5.4157	9.71e-05	0.0360058	4.7402	5.3793	0.014106	0.912738	0.028571	0.805685	0.24	0.729859	0.998048	0.000673608	0.0016	4.0515	0.999683	0.265524
FB-CM	ELAVL1-MYC	-49.264	8.8223	3.83e-06	0.00249612	-5.1224	9.6173	0.006992	0.912738	0.028571	0.805685	0.08	0.450284	0.727738	0.000695076	-0.0663	-5.46	0.981933	0.267714
FB-CM	MCPH1-BRCA2	-20.4829	3.2423	7.15e-07	0.000600932	-7.1278	2.8737	0.00045	0.642622	0.028571	0.805685	0.68	1	0.557708	6.04e-06	0.1693	-2.8445	0.979433	0.0368424
FB-CM	SUMO1-ELF4	-24.7795	5.0401	0.000102829	0.0376634	-4.3291	5.7239	0.00653	0.912738	0.028571	0.805685	0.78	1	0.954895	0.000736626	0.013	-2.6639	0.997893	0.272381
FB-CM	ZBTB16-MYC	-66.6632	13.0961	5.95e-05	0.0242297	-6.31	10.5647	0.006843	0.912738	0.028571	0.805685	0.28	0.769683	0.350363	0.000695076	-1.0262	-5.46	0.978962	0.267714
FB-CM	SUMO2-ELF4	-27.5019	4.8582	1.33e-06	0.00101834	-4.7271	5.8179	0.005916	0.912738	0.028571	0.805685	0.88	1	0.122919	0.000736626	-0.4739	-2.6639	0.963808	0.272381
FB-CM	HUWE1-MYC	-57.8056	10.2884	6.1e-06	0.00367186	-5.1525	11.2188	0.009434	0.912738	0.028571	0.805685	0.26	0.750887	0.833371	0.000695076	0.0507	-5.46	0.989637	0.267714
FB-CM	ABL1-PRKD1	24.1343	5.0693	8.15e-05	0.0312785	5.5125	4.3781	0.001676	0.819317	0.028571	0.805685	0.14	0.580719	0.118404	0.00194933	0.3916	2.1842	0.963808	0.404502
FB-CM	INCENP-AURKB	-24.3536	5.0316	7.25e-05	0.0284826	-4.8632	5.0077	0.003803	0.912738	0.028571	0.805685	0.72	1	0.0289465	0.00433288	-1.0301	-4.0246	0.927927	0.539026
FB-CM	ELAVL1-TRIB3	-89.8116	7.4408	0	0	-11.732	7.6553	0.000549	0.643809	0.029401	0.805685	1	1	0.727738	2.69e-06	-0.0663	-9.9775	0.981933	0.0254785
FB-CM	SP1-GCNT1	-37.5254	5.8077	4.16e-08	5.43e-05	-5.4273	6.9142	0.001626	0.814054	0.028571	0.805685	0.04	0.307385	0.753498	0.000135364	0.0878	-4.3952	0.983861	0.136322
FB-CM	ESR1-MYC	-45.6977	8.7441	1.52e-05	0.00783485	-4.9816	9.1733	0.011987	0.912738	0.028571	0.805685	0.14	0.580719	0.701366	0.000695076	0.1293	-5.46	0.981188	0.267714
FB-CM	PPM1D-UNG	15.5232	2.8987	1.57e-05	0.00804639	8.4795	1.8307	0.001027	0.731434	0.028571	0.805685	0.44	0.903094	0.979963	0.000112398	0.0068	1.8407	0.999242	0.129297
FB-CM	CDK4-MYC	-38.1671	6.5237	7.84e-07	0.000648265	-4.4805	8.5184	0.004247	0.912738	0.028571	0.805685	0.38	0.852867	0.254012	0.000695076	-0.4773	-5.46	0.973796	0.267714
FB-CM	PALB2-BRCA2	-14.7933	2.5169	5.85e-07	0.000509637	-6.4598	2.2901	0.004307	0.912738	0.028571	0.805685	0.7	1	0.527337	6.04e-06	-0.1556	-2.8445	0.978962	0.0368424
FB-CM	NRF1-EIF2S2	-22.2869	4.5799	8.11e-05	0.0311673	-4.4723	4.9833	0.005517	0.912738	0.028571	0.805685	1	1	0.24299	0.000125164	0.3506	-2.6327	0.972764	0.133378
FB-CM	EMSY-BRCA2	-26.0343	3.5078	6.7e-11	2.23e-07	-8.9394	2.9123	0.000183	0.536045	0.028571	0.805685	0.9	1	0.919445	6.04e-06	0.0275	-2.8445	0.995237	0.0368424
FB-CM	MAX-MYC	-43.446	7.9184	4.31e-06	0.0027462	-4.7383	9.1691	0.008659	0.912738	0.028571	0.805685	0.5	0.944488	0.332106	0.000695076	0.2062	-5.46	0.978962	0.267714
FB-CM	ACVR2B-INHBA	-26.3898	5.0725	1.03e-05	0.00564015	-4.4378	5.9466	0.008315	0.912738	0.028571	0.805685	0.3	0.789097	0.0164916	0.000148973	0.8434	-5.1617	0.821089	0.140107
FB-CM	MAPK3-MYC	-38.6132	8.2165	2.93e-05	0.0134932	-3.3874	11.3989	0.017745	0.912738	0.028571	0.805685	0.64	1	0.797294	0.000695076	-0.2052	-5.46	0.986704	0.267714
FB-CM	FGFR2-FGF7	-50.9231	8.6926	2.27e-06	0.00160211	-5.7754	8.8172	0.003015	0.912738	0.028571	0.805685	0.3	0.789097	0.748903	0.00026469	-0.1243	-5.0906	0.98371	0.173961
FB-CM	TEK-ANGPT1	41.8455	7.6236	3.98e-06	0.00257273	4.5106	9.2772	0.004101	0.912738	0.028571	0.805685	0.18	0.649903	0.0740964	0.000928476	0.655	3.1352	0.963808	0.29737
FB-CM	MAPK14-MKNK1	-10.5523	1.2855	3e-12	1.4e-08	-5.514	1.9137	0.0015	0.800881	0.028571	0.805685	1	1	0.0474511	0.000536134	0.4539	-1.6145	0.963808	0.235464
FB-CM	ACVR2A-INHBA	-45.5494	6.5389	4.85e-09	8.83e-06	-6.1197	7.443	0.005651	0.912738	0.028571	0.805685	1	1	0.73285	0.000148973	0.0857	-5.1617	0.982594	0.140107
FB-CM	ACVR1B-INHBA	-38.0523	5.8381	2.28e-07	0.000232548	-6.2025	6.135	0.005127	0.912738	0.028571	0.805685	0.38	0.852867	0.354066	0.000148973	0.1964	-5.1617	0.978962	0.140107
FB-CM	ADM-RAMP1	34.7132	7.2571	8.89e-05	0.033592	4.5846	7.5717	0.004874	0.912738	0.029401	0.805685	0.22	0.701829	0.465747	0.00188366	0.3139	5.0175	0.978962	0.40039
FB-CM	OSTN-NPR3	-49.277	6.3003	0	0	-5.859	8.4104	0.009737	0.912738	0.028571	0.805685	0.66	1	6.51e-05	0.0619724	-5.4378	-1.3602	0.0978244	0.963808
FB-CM	RAC1-ARHGEF2	-33.6943	6.128	2e-05	0.00981296	-5.134	6.563	0.003018	0.912738	0.028571	0.805685	0.82	1	0.681474	4.71e-05	-0.1911	-3.486	0.981007	0.0826169
FB-CM	MAPK14-DUSP10	18.4764	3.3175	2.25e-06	0.00159557	11.2645	1.6402	0.000116	0.461111	0.028571	0.805685	0.6	1	0.0474511	0.000966377	0.4539	1.5324	0.963808	0.302341
FB-CM	MYRIP-CAMK2A	19.5408	3.867	8.07e-05	0.0310246	5.4658	3.5751	0.003918	0.912738	0.028571	0.805685	0.36	0.838242	0.032029	0.00129851	0.7015	1.3494	0.944626	0.343602
FB-CM	MAPK14-NFATC1	17.1771	3.3311	3.92e-05	0.0172065	7.5947	2.2617	0.002511	0.896237	0.028571	0.805685	0.16	0.615014	0.0474511	0.00153033	0.4539	1.4125	0.963808	0.369801
FB-CM	BCL2-BIK	22.2114	4.4194	1.72e-05	0.00867055	5.1449	4.3172	0.002213	0.869826	0.028571	0.805685	0.02	0.195524	0.91824	0.000188707	0.0358	2.0777	0.995165	0.149515
FB-CM	RIPK2-NOD1	21.7598	3.5537	2.64e-06	0.00182162	6.0709	3.5843	0.003557	0.912738	0.028571	0.805685	1	1	0.213476	0.000390664	0.279	2.4409	0.96914	0.204194
FB-CM	DLG1-PBK	22.7789	3.6444	9.01e-08	0.00010559	6.6125	3.4448	0.004526	0.912738	0.026519	0.805685	0.9	1	0.581844	0.000348938	0.1791	2.0819	0.979433	0.193996
FB-CM	PKN1-ARHGEF2	-27.9977	4.0961	9.82e-10	2.25e-06	-9.9914	2.8022	0.00106	0.73895	0.028571	0.805685	1	1	0.86132	4.71e-05	0.0369	-3.486	0.990276	0.0826169
FB-CM	DAB2IP-ERN1	-23.6974	3.9408	6.37e-07	0.00054573	-8.7462	2.7095	0.000462	0.642929	0.028571	0.805685	0.34	0.822069	0.630836	0.000134021	-0.1003	-2.4403	0.979796	0.135484
FB-CM	MARK2-ARHGEF2	-32.4381	4.7103	1.83e-09	3.83e-06	-7.2532	4.4722	0.000362	0.629432	0.028571	0.805685	0.46	0.917918	0.407868	4.71e-05	0.1854	-3.486	0.978962	0.0826169
FB-CM	LFNG-NOTCH2	-16.9682	3.2196	3.23e-05	0.0146317	-4.4675	3.7982	0.004323	0.912738	0.028571	0.805685	0.24	0.729859	0.00127534	0.00658595	-1.9549	0.8823	0.342913	0.619757
FB-CM	DOT1L-MYC	-40.7967	7.6864	1.69e-06	0.00124601	-4.5496	8.9672	0.007182	0.912738	0.028571	0.805685	1	1	0.718197	0.000695076	0.091	-5.46	0.981933	0.267714
FB-CM	TM9SF4-ATP6V1H	-17.6926	3.1601	3.54e-06	0.00233943	-8.9667	1.9732	0.000219	0.578133	0.028571	0.805685	1	1	0.314648	0.000121663	-0.2146	-1.7353	0.978962	0.132683
FB-CM	RHOA-ARHGEF2	-36.7109	5.6157	1.04e-07	0.000119887	-6.8797	5.3362	0.000587	0.643809	0.028571	0.805685	0.44	0.903094	0.743639	4.71e-05	-0.1077	-3.486	0.983626	0.0826169
FB-CM	AURKB-ATM	-25.217	5.8918	9.08e-05	0.0341555	-4.1654	6.0539	0.006551	0.912738	0.028571	0.805685	1	1	0.00282281	0.869491	-2.4592	-0.0505	0.461643	0.991229
FB-CM	AURKB-DSN1	-15.5387	2.9911	2.57e-06	0.00178111	-5.0266	3.0913	0.004513	0.912738	0.028571	0.805685	0.52	0.957827	0.00282281	0.0143808	-2.4592	-1.6387	0.461643	0.797475
FB-CM	NEDD4L-SCN4A	69.2497	12.2957	4.58e-06	0.00288227	4.976	13.9167	0.011773	0.912738	0.029401	0.805685	1	1	0.176109	0.000793936	0.411	6.6493	0.965251	0.281901
FB-CM	AKT1-TRIB3	-64.9544	10.3867	7.86e-08	9.39e-05	-4.1931	15.4909	0.013954	0.912738	0.029401	0.805685	0.74	1	0.72501	2.69e-06	0.4015	-9.9775	0.981933	0.0254785
FB-CM	NSD3-MYC	-58.5422	11.2645	5.91e-05	0.0241008	-5.1185	11.4373	0.011969	0.912738	0.028571	0.805685	1	1	0.540209	0.000695076	0.2175	-5.46	0.978962	0.267714
FB-CM	PHKA2-PHKG1	25.7118	4.3942	3.65e-06	0.00240187	7.2616	3.5408	0.005107	0.912738	0.028571	0.805685	1	1	0.0471388	0.000805414	0.5641	2.3621	0.963808	0.281901
FB-CM	CCAR2-SUV39H1	26.721	5.08	1.04e-05	0.00569676	4.9769	5.369	0.012418	0.912738	0.028571	0.805685	0.7	1	0.759679	0.000673608	0.0764	4.0515	0.984239	0.265524
FB-CM	CSNK1A1-FOXO6	18.2929	3.3405	8.95e-06	0.00503842	7.6547	2.3898	0.00032	0.622241	0.028571	0.805685	0.06	0.384333	0.792703	0.000265119	-0.057	1.7036	0.986188	0.173961
FB-CM	PTPN1-ROS1	-33.571	4.9506	2.37e-08	3.37e-05	-6.493	5.1703	0.000635	0.649659	0.028571	0.805685	0.36	0.838242	0.933578	0.000120045	0.0158	-4.0883	0.996329	0.132547
FB-CM	SARM1-TICAM1	17.6811	2.9527	5.04e-06	0.00311931	6.9285	2.5519	0.002281	0.874443	0.026519	0.805685	0.16	0.615014	0.000319839	0.389981	2.1716	0.3818	0.187307	0.978962
FB-CM	SKP2-MYC	-33.5249	6.2786	3.69e-05	0.0163781	-5.0015	6.7029	0.0093	0.912738	0.028571	0.805685	0.64	1	0.545911	0.000695076	0.1559	-5.46	0.978962	0.267714
FB-CM	BCORL1-HDAC7	19.3615	2.9422	2.5e-08	3.53e-05	6.8909	2.8097	0.000628	0.648741	0.028571	0.805685	1	1	0.361998	0.000107699	0.2079	2.2595	0.978962	0.126885
FB-CM	MARK2-HDAC7	23.8578	3.5321	4.95e-09	8.97e-06	8.2381	2.896	0.000268	0.610001	0.028571	0.805685	0.4	0.869191	0.407868	0.000107699	0.1854	2.2595	0.978962	0.126885
FB-CM	PIM1-MYC	-36.0172	7.6612	0.000111444	0.0401846	-3.6254	9.9346	0.011036	0.912738	0.028571	0.805685	1	1	0.539137	0.000695076	0.3593	-5.46	0.978962	0.267714
FB-CM	SRC-PRKD1	18.5988	3.8333	9.61e-05	0.0357208	7.5927	2.4496	0.000395	0.633106	0.028571	0.805685	0.24	0.729859	0.0868651	0.00194933	0.4189	2.1842	0.963808	0.404502
FB-CM	HSPG2-PTPRS	26.5996	5.8946	0.000118514	0.0421256	4.2923	6.197	0.013312	0.912738	0.028571	0.805685	0.02	0.195524	0.147413	0.00325314	0.3476	2.0832	0.963808	0.484504
FB-CM	PRKCA-SLC6A9	-66.3659	10.3192	1.07e-08	1.72e-05	-5.9935	11.0729	0.005522	0.912738	0.028571	0.805685	0.5	0.944488	0.711997	0.00021963	0.1412	-5.8347	0.981933	0.159745
FB-CM	JAK2-MYC	-48.6584	9.0452	2.57e-05	0.012117	-5.0537	9.6282	0.010548	0.912738	0.028571	0.805685	0.8	1	0.592658	0.000695076	0.1423	-5.46	0.979433	0.267714
FB-CM	CSNK2A2-AQP4	45.0861	8.7885	7.4e-05	0.028974	4.7579	9.476	0.015075	0.912738	0.029401	0.805685	1	1	0.448422	0.000907156	-0.1583	5.3614	0.978962	0.296302
FB-CM	RPS6KB1-DEPTOR	-23.8307	4.4235	1e-05	0.0055319	-7.131	3.3419	0.002155	0.864455	0.028571	0.805685	0.38	0.852867	0.966823	0.000115695	-0.0129	-2.4348	0.999012	0.131439
FB-CM	PPP2CA-HDAC7	20.129	3.5603	5.7e-06	0.00346077	6.5616	3.0677	0.001114	0.750168	0.028571	0.805685	0.92	1	0.920748	0.000107699	-0.0263	2.2595	0.995237	0.126885
FB-CM	PRKAA1-MLXIPL	14.1654	2.9776	0.000135065	0.0467282	7.1551	1.9797	0.001992	0.851748	0.028571	0.805685	0.08	0.450284	0.262821	0.00056881	0.235	1.435	0.975258	0.241762
FB-CM	PAK1-ARHGEF2	-26.892	3.486	9.4e-11	3e-07	-8.2679	3.2526	0.001472	0.798301	0.028571	0.805685	0.86	1	0.0575993	4.71e-05	-0.5277	-3.486	0.963808	0.0826169
FB-CM	CAMK2D-HDAC4	20.5395	3.8592	2.7e-05	0.0125772	7.2379	2.8378	0.000358	0.629432	0.028571	0.805685	0.62	1	0.394688	0.000248293	0.2018	1.6519	0.978962	0.169866
FB-CM	DYRK1A-FOXO6	19.718	3.2021	9.22e-07	0.000744123	7.5927	2.597	0.000459	0.642622	0.028571	0.805685	0.3	0.789097	0.187082	0.000265119	0.3737	1.7036	0.965251	0.173961
FB-CM	CREBBP-MYBL1	-51.3653	5.414	0	0	-9.7127	5.2885	0.000128	0.478781	0.028571	0.805685	1	1	0.504064	1.18e-05	0.1859	-4.6867	0.978962	0.0522426
FB-CM	ADAM10-EGF	18.7181	3.5017	2.81e-05	0.0130281	5.8747	3.1862	0.005027	0.912738	0.028571	0.805685	1	1	0.468797	0.000123852	-0.16	2.1307	0.978962	0.132683
FB-CM	MUSK-WNT11	26.4732	5.3888	6.79e-05	0.0269967	4.7663	5.5543	0.011051	0.912738	0.029401	0.805685	0.06	0.384333	0.812696	0.000777545	0.1034	4.7408	0.988036	0.278573
FB-CM	MAP3K7-HDAC7	20.9235	3.3603	2.44e-07	0.000246073	7.3298	2.8546	0.000878	0.70776	0.028571	0.805685	0.42	0.887979	0.5171	0.000107699	0.1398	2.2595	0.978962	0.126885
FB-CM	BRD4-MYC	-55.1195	10.2332	1.85e-05	0.00923763	-5.1216	10.7622	0.009315	0.912738	0.028571	0.805685	0.74	1	0.563717	0.000695076	0.1449	-5.46	0.979433	0.267714
FB-CM	MYCBP2-MYC	-62.2287	11.6843	2.9e-05	0.0133476	-5.2415	11.8723	0.010588	0.912738	0.028571	0.805685	0.72	1	0.994778	0.000695076	-0.0026	-5.46	0.999509	0.267714
FB-CM	LYN-SLC4A1	24.4727	3.7468	2.11e-07	0.000217507	7.3942	3.3097	0.000901	0.713216	0.026519	0.805685	1	1	0.945317	0.000203193	0.0221	2.5992	0.997081	0.154518
FB-CM	SRC-HCN4	34.7821	6.8099	3.83e-05	0.0169051	4.7171	7.3736	0.014506	0.912738	0.029401	0.805685	0.86	1	0.0868651	0.00169801	0.4189	4.9741	0.963808	0.385563
FB-CM	NCL-MYB	13.976	2.8631	9.68e-05	0.0358997	5.2904	2.6418	0.003157	0.912738	0.026519	0.805685	0.64	1	0.230955	0.0013296	-0.5173	1.5503	0.97109	0.34682
FB-CM	NCL-MYBL1	-46.5131	5.0423	0	0	-7.5643	6.149	0.000357	0.629432	0.028571	0.805685	0.28	0.769683	0.230955	1.18e-05	-0.5173	-4.6867	0.97109	0.0522426
FB-CM	MAPK1-MYC	-52.433	9.5411	1.92e-05	0.00951866	-5.0642	10.3537	0.008428	0.912738	0.028571	0.805685	0.26	0.750887	0.688446	0.000695076	0.0841	-5.46	0.981022	0.267714
FB-CM	MAPK1-ARHGEF2	-32.9974	4.6207	7.9e-09	1.33e-05	-8.2398	4.0046	0.000308	0.620397	0.028571	0.805685	0.14	0.580719	0.688446	4.71e-05	0.0841	-3.486	0.981022	0.0826169
FB-CM	SYK-SLC4A1	20.7885	3.1407	2.87e-08	3.96e-05	7.6315	2.724	0.001494	0.800806	0.026519	0.805685	0.12	0.539527	0.906304	0.000203193	-0.0323	2.5992	0.994388	0.154518
FB-CM	MAPK8-MYC	-47.481	9.271	4.68e-05	0.0199616	-5.1544	9.2118	0.011394	0.912738	0.028571	0.805685	0.62	1	0.680434	0.000695076	0.1222	-5.46	0.981006	0.267714
FB-CM	MAPK9-MYC	-45.007	8.9099	5.46e-05	0.0225875	-4.9955	9.0096	0.011795	0.912738	0.028571	0.805685	0.1	0.497333	0.293093	0.000695076	0.3229	-5.46	0.978962	0.267714
FB-CM	PPP3CC-NFATC1	15.7769	3.305	6.21e-05	0.0251093	6.5332	2.4149	0.001267	0.772473	0.028571	0.805685	1	1	0.101479	0.00153033	0.4393	1.4125	0.963808	0.369801
FB-CM	CSNK1A1-DEPTOR	-27.3064	4.215	3.78e-08	5.01e-05	-7.6411	3.5736	0.000633	0.649225	0.028571	0.805685	1	1	0.792703	0.000115695	-0.057	-2.4348	0.986188	0.131439
FB-CM	GSK3A-MYC	-37.2467	7.1843	2.25e-05	0.0108103	-4.0263	9.2508	0.006909	0.912738	0.028571	0.805685	0.2	0.676998	0.598153	0.000695076	-0.2531	-5.46	0.979433	0.267714
FB-CM	GSK3B-UNG	19.6891	3.1329	1.02e-08	1.65e-05	10.2894	1.9135	5.4e-05	0.370728	0.028571	0.805685	1	1	0.922235	0.000112398	-0.0215	1.8407	0.995237	0.129297
FB-CM	GSK3B-CCND2	-35.2661	6.442	2.65e-05	0.0123983	-5.643	6.2496	0.009924	0.912738	0.028571	0.805685	0.56	0.979773	0.922235	0.0005557	-0.0215	-3.2642	0.995237	0.238718
FB-CM	GSK3B-MAP1B	-36.0022	5.3503	4.46e-07	0.000407745	-7.4766	4.8153	0.000766	0.681307	0.028571	0.805685	0.04	0.307385	0.922235	0.000106309	-0.0215	-3.3349	0.995237	0.126527
FB-CM	GSK3B-HDAC4	17.4707	3.7751	0.000145454	0.0495627	5.3288	3.2785	0.003014	0.912738	0.028571	0.805685	0.4	0.869191	0.922235	0.000248293	-0.0215	1.6519	0.995237	0.169866
FB-CM	GSK3B-SPAG5	-38.453	4.8223	3.1e-11	1.14e-07	-8.6004	4.4711	0.002746	0.912738	0.028571	0.805685	1	1	0.922235	4.11e-05	-0.0215	-3.565	0.995237	0.0784444
FB-CM	PPP2CB-MYC	-44.5696	8.3245	7.89e-07	0.000651422	-5.1632	8.6322	0.007614	0.912738	0.028571	0.805685	1	1	0.782096	0.000695076	-0.0597	-5.46	0.985315	0.267714
FB-CM	PPP2CB-HDAC7	17.8273	3.3041	9.63e-05	0.0357678	6.639	2.6852	0.000572	0.643809	0.028571	0.805685	0.38	0.852867	0.782096	0.000107699	-0.0597	2.2595	0.985315	0.126885
FB-CM	CSNK2A1-MYB	14.7467	2.9228	2.19e-05	0.0105775	5.457	2.7023	0.003385	0.912738	0.026519	0.805685	1	1	0.767788	0.0013296	0.0591	1.5503	0.984537	0.34682
FB-CM	CSNK2A1-EIF2S2	-24.2951	4.1863	8.55e-06	0.00484573	-8.0794	3.007	0.000778	0.682245	0.028571	0.805685	0.6	1	0.767788	0.000125164	0.0591	-2.6327	0.984537	0.133378
FB-CM	CSNK2A1-AQP4	51.004	9.7632	7.47e-05	0.0292084	4.8132	10.5967	0.014628	0.912738	0.029401	0.805685	0.44	0.903094	0.767788	0.000907156	0.0591	5.3614	0.984537	0.296302
FB-CM	CDR2-MYC	-44.9732	8.2288	1.11e-05	0.00602349	-5.6895	7.9046	0.007417	0.912738	0.028571	0.805685	0.68	1	0.304859	0.000695076	-0.3508	-5.46	0.978962	0.267714
FB-CM	PPP3CA-NFATC1	19.2663	4.0089	0.000120737	0.042726	5.9108	3.2595	0.005603	0.912738	0.028571	0.805685	1	1	0.310622	0.00153033	0.2956	1.4125	0.978962	0.369801
FB-CM	ELAVL2-ADAM10	-30.8455	5.6246	7.33e-06	0.00426643	-5.0135	6.1525	0.01116	0.912738	0.028571	0.805685	0.2	0.676998	0.00063434	0.904522	-2.7036	-0.0351	0.257228	0.994388
FB-CM	PRKAA1-HDAC4	16.0729	3.1034	7.87e-05	0.0304243	7.559	2.1263	0.000279	0.613497	0.028571	0.805685	0.82	1	0.262821	0.000248293	0.235	1.6519	0.975258	0.169866
FB-CM	PRKAA1-HDAC7	20.1732	3.2009	3.06e-07	0.000298336	7.8523	2.5691	0.001209	0.764432	0.028571	0.805685	0.44	0.903094	0.262821	0.000107699	0.235	2.2595	0.975258	0.126885
FB-CM	PAK2-MKNK1	-16.5879	3.3623	6.23e-05	0.0251515	-6.5971	2.5144	0.000889	0.709622	0.028571	0.805685	1	1	0.767897	0.000536134	-0.0609	-1.6145	0.984537	0.235464
FB-CM	EFNB3-EPHA4	47.3906	9.5315	0.000120842	0.0427548	4.7395	9.999	0.006636	0.912738	0.026519	0.805685	0.46	0.917918	0.00216064	0.0206735	3.7169	1.2646	0.418331	0.866347
FB-CM	NID2-COL13A1	34.2942	4.5641	3.4e-11	1.24e-07	6.3508	5.4	0.00074	0.674854	0.028571	0.805685	0.86	1	0.268854	0.000111589	0.2541	3.9478	0.976281	0.128905
FB-CM	EFNB3-EPHB4	32.4642	6.5696	0.000146138	0.0497445	4.3679	7.4325	0.005261	0.912738	0.026519	0.805685	0.46	0.917918	0.00216064	0.0301518	3.7169	2.1324	0.418331	0.93614
FB-CM	ACVR1-INHBA	-48.658	7.2195	2.35e-08	3.35e-05	-6.3755	7.632	0.005476	0.912738	0.028571	0.805685	0.04	0.307385	0.779831	0.000148973	0.059	-5.1617	0.985147	0.140107
FB-CM	NID1-COL13A1	45.9238	6.2551	1.7e-11	6.68e-08	7.5462	6.0857	0.000476	0.643676	0.028571	0.805685	0.98	1	0.991051	0.000111589	-0.0027	3.9478	0.999478	0.128905
FB-CM	FGFR1-FGF2	27.71	4.5268	7.23e-07	0.000606792	8.6106	3.2181	0.00047	0.643676	0.028571	0.805685	1	1	0.575299	0.000169963	0.1503	2.4658	0.979433	0.142031
FB-CM	SDC2-FGF2	30.7181	4.9337	3.91e-08	5.16e-05	6.4974	4.7278	0.00065	0.651454	0.028571	0.805685	0.82	1	0.486012	0.000169963	0.2071	2.4658	0.978962	0.142031
FB-CM	FGFR1-FGF7	-53.3989	8.8613	1.99e-06	0.00143148	-5.6324	9.4807	0.00878	0.912738	0.028571	0.805685	0.04	0.307385	0.575299	0.00026469	0.1503	-5.0906	0.979433	0.173961
FB-CM	CALM2-ADCY8	40.0248	6.0672	1.22e-07	0.000136201	7.2268	5.5384	0.002622	0.905325	0.028571	0.805685	0.24	0.729859	0.421641	6.45e-05	-0.3738	4.4499	0.978962	0.0974386
FB-CM	CALM2-SCN4A	61.0559	12.5378	2.39e-05	0.0113671	4.703	12.9823	0.014103	0.912738	0.029401	0.805685	0.2	0.676998	0.421641	0.000793936	-0.3738	6.6493	0.978962	0.281901
FB-CM	ADAMTS3-CCBE1	32.3532	4.4919	4.89e-09	8.89e-06	6.5835	4.9143	0.00483	0.912738	0.028571	0.805685	0.86	1	0.0514593	1.06e-05	-0.615	4.5127	0.963808	0.0516841
FB-CM	HSPG2-COL13A1	46.1333	7.3953	3.06e-07	0.000298336	6.5835	7.0075	0.000595	0.643809	0.028571	0.805685	0.14	0.580719	0.147413	0.000111589	0.3476	3.9478	0.963808	0.128905
FB-CM	CALM2-SCTR	-43.7924	8.6045	4.29e-05	0.0185865	-4.5923	9.5361	0.006049	0.912738	0.028571	0.805685	0.58	0.993964	0.421641	0.00121675	-0.3738	-4.3793	0.978962	0.337902
FB-CM	FGF7-NRP1	36.7255	5.8318	7.28e-08	8.8e-05	7.1897	5.1081	0.00083	0.696143	0.028571	0.805685	0.36	0.838242	0.000131129	0.00658766	1.3948	2.5703	0.135025	0.619757
FB-CM	GNAS-ADCY8	47.8448	6.7001	2.91e-10	8.06e-07	7.4183	6.4496	0.002331	0.877983	0.028571	0.805685	0.34	0.822069	0.295879	6.45e-05	-0.3446	4.4499	0.978962	0.0974386
FB-CM	PENK-OGFR	28.7336	5.7998	8.91e-05	0.0336531	4.71	6.1005	0.004437	0.912738	0.029401	0.805685	0.5	0.944488	0.0777987	0.00179231	0.725	4.2708	0.963808	0.393311
FB-CM	VEGFC-CCBE1	48.3506	5.8352	0	0	7.1486	6.7636	0.003303	0.912738	0.028571	0.805685	0.58	0.993964	0.284807	1.06e-05	0.4495	4.5127	0.978556	0.0516841
FB-CM	GDF15-TGFBR2	-56.8638	10.9278	5.2e-05	0.0216988	-5.0537	11.252	0.014633	0.912738	0.028571	0.805685	0.16	0.615014	0.000438574	0.0918512	-6.8112	1.188	0.214551	0.963808
FB-CM	LAMB1-SV2B	-16.4549	3.6772	0.00013157	0.0458082	-6.6135	2.4881	0.000606	0.645877	0.028571	0.805685	1	1	0.6748	0.000825134	0.122	-1.6135	0.980642	0.285419
FB-CM	LAMC3-SV2B	-11.7244	2.2663	3.29e-06	0.00219862	-6.167	1.9011	0.002495	0.894756	0.028571	0.805685	0.4	0.869191	0.0529531	0.000825134	-0.5582	-1.6135	0.963808	0.285419
FB-CM	PTPRS-SLITRK6	23.2189	4.1798	8.82e-06	0.00497406	5.2695	4.4063	0.00863	0.912738	0.026519	0.805685	0.12	0.539527	0.188606	0.000674901	-0.2953	2.7506	0.96538	0.265524
FB-CM	FGFR2-RAMP1	49.2911	10.6963	0.000108953	0.0394505	4.2241	11.6689	0.007353	0.912738	0.029401	0.805685	1	1	0.748903	0.00188366	-0.1243	5.0175	0.98371	0.40039
FB-CM	NCAM1-CLEC2L	24.6918	3.7445	7.63e-09	1.29e-05	6.4367	3.8361	0.000712	0.669413	0.029401	0.805685	1	1	0.516222	0.000168071	-0.2262	3.2814	0.978962	0.14131
FB-CM	DSCAML1-PTPRT	-35.8254	4.3712	1e-12	5.04e-09	-8.9386	4.0079	0.001324	0.776788	0.028571	0.805685	0.5	0.944488	0.114712	1.32e-06	-0.6915	-6.9411	0.963808	0.018135
FB-CM	MET-ITGAX	-14.536	2.903	6.99e-05	0.0276167	-7.4273	1.9571	0.000769	0.681401	0.028571	0.805685	1	1	0.00979373	0.00220973	-2.5357	-2.3623	0.707441	0.421892
FB-CM	ACVR1B-IGSF1	37.6249	6.2868	4.22e-07	0.000390247	5.7516	6.5417	0.002795	0.912738	0.026519	0.805685	0.08	0.450284	0.354066	0.000428072	0.1964	4.8488	0.978962	0.21205
FB-CM	LRRC4-PRSS55	46.3956	4.7456	0	0	10.001	4.6391	0.000917	0.715785	0.028571	0.805685	1	1	0.785638	4.27e-06	-0.1572	5.2105	0.9856	0.0325758
FB-CM	PTPRD-SLITRK6	30.3633	5.4389	0.000122122	0.043078	5.2934	5.7361	0.008726	0.912738	0.026519	0.805685	0.34	0.822069	0.195318	0.000674901	0.4514	2.7506	0.966293	0.265524
FB-CM	ERBB2-PLXNB1	18.0333	3.4535	8.52e-05	0.0324031	4.7819	3.7712	0.00351	0.912738	0.028571	0.805685	0.84	1	0.294178	6.84e-05	0.3782	2.6675	0.978962	0.100405
FB-CM	SEMA4C-PLXNB1	17.6057	3.2605	9.7e-06	0.00539037	6.3496	2.7727	0.000783	0.682245	0.028571	0.805685	1	1	0.478144	6.84e-05	-0.1882	2.6675	0.978962	0.100405
FB-CM	CSF1-SLC7A1	-21.9729	4.3268	7.72e-05	0.0299626	-5.7848	3.7984	0.004279	0.912738	0.028571	0.805685	0.7	1	0.606288	4.37e-05	0.1507	-2.6426	0.979433	0.0795503
FB-CM	FGFR2-ROS1	-40.8751	5.9997	7.75e-10	1.82e-06	-6.307	6.4809	0.0008	0.68689	0.028571	0.805685	0.28	0.769683	0.748903	0.000120045	-0.1243	-4.0883	0.98371	0.132547
FB-CM	AURKA-WDR62	-11.7667	2.7136	9.23e-05	0.0345819	-3.6445	3.2286	0.017323	0.912738	0.057143	0.941553	1	1	0.00445218	0.143837	-2.0727	-0.6931	0.543296	0.963808
FB-CM	PRKCZ-PHGDH	-32.2524	4.7972	4.86e-08	6.25e-05	-5.3209	6.0615	0.003863	0.912738	0.029401	0.805685	1	1	0.516727	1.65e-05	0.4053	-6.895	0.978962	0.0580768
FB-CM	AURKA-ARHGEF2	-26.9084	5.3842	1.57e-05	0.00804918	-4.1741	6.4465	0.013739	0.912738	0.028571	0.805685	0.26	0.750887	0.00445218	4.71e-05	-2.0727	-3.486	0.543296	0.0826169
FB-CM	PRKCA-KLHL3	24.2566	5.0243	9.38e-05	0.0350261	4.8022	5.0511	0.004335	0.912738	0.028571	0.805685	0.3	0.789097	0.711997	0.000249147	0.1412	1.9969	0.981933	0.169866
FB-CM	CSNK2A1-SLC3A2	-25.5935	4.8661	8.01e-07	0.000659463	-5.2486	4.8763	0.002702	0.911834	0.028571	0.805685	1	1	0.767788	0.000571909	0.0591	-2.7571	0.984537	0.241762
FB-CM	CSNK2A1-MYC	-51.5718	9.5057	1.8e-05	0.00903085	-4.879	10.5701	0.006553	0.912738	0.028571	0.805685	1	1	0.767788	0.000695076	0.0591	-5.46	0.984537	0.267714
FB-CM	CDK2-BRCA2	-17.4796	2.5643	3.52e-09	6.74e-06	-8.5341	2.0482	0.000214	0.572873	0.028571	0.805685	1	1	0.446996	6.04e-06	-0.1808	-2.8445	0.978962	0.0368424
FB-CM	MARK2-HDAC4	18.4151	3.6134	4.13e-05	0.0180192	5.791	3.1799	0.001767	0.831007	0.028571	0.805685	1	1	0.407868	0.000248293	0.1854	1.6519	0.978962	0.169866
FB-CM	SRC-ARHGEF2	-18.8011	3.4318	1.35e-05	0.00709607	-5.212	3.6073	0.002278	0.874161	0.028571	0.805685	1	1	0.0868651	4.71e-05	0.4189	-3.486	0.963808	0.0826169
FB-CM	PRKD1-TFAP2A	18.0031	3.9049	0.000121289	0.0428668	4.8969	3.6765	0.014195	0.912738	0.028571	0.805685	1	1	0.887935	0.0017165	0.0613	1.8905	0.992844	0.385563
FB-CM	AURKB-RUNX3	-12.3721	2.3828	9.34e-05	0.034923	-5.2336	2.364	0.00195	0.84775	0.028571	0.805685	0.26	0.750887	0.00282281	0.00106344	-2.4592	-1.1736	0.461643	0.316422
FB-CM	CSNK1A1-SLC4A1	28.4882	4.2648	9.14e-10	2.11e-06	6.8344	4.1684	0.000789	0.682245	0.026519	0.805685	0.02	0.195524	0.792703	0.000203193	-0.057	2.5992	0.986188	0.154518
FB-CM	SRC-PBK	14.2494	2.2242	1.5e-06	0.00112715	6.4302	2.216	0.005673	0.912738	0.026519	0.805685	0.58	0.993964	0.0868651	0.000348938	0.4189	2.0819	0.963808	0.193996
FB-CM	PRKCA-AQP4	62.301	11.9552	2.25e-05	0.0108074	4.832	12.8935	0.013557	0.912738	0.029401	0.805685	0.92	1	0.711997	0.000907156	0.1412	5.3614	0.981933	0.296302
FB-CM	CSNK2A1-BIK	20.2136	3.4046	1.3e-07	0.000144467	7.7615	2.6043	0.003084	0.912738	0.028571	0.805685	1	1	0.767788	0.000188707	0.0591	2.0777	0.984537	0.149515
FB-CM	CSNK2A1-FGF14	28.8347	3.5847	1e-12	5.04e-09	10.2688	2.808	0.000214	0.572873	0.028571	0.805685	0.24	0.729859	0.767788	9.45e-06	0.0591	2.9686	0.984537	0.0490427
FB-CM	FYN-PTPRT	-70.4066	6.2813	0	0	-10.0237	7.024	9.4e-05	0.432027	0.028571	0.805685	1	1	0.0908627	1.32e-06	0.519	-6.9411	0.963808	0.018135
FB-CM	MARK3-ARHGEF2	-32.5259	4.9301	8.66e-08	0.000102079	-6.6788	4.87	0.000553	0.643809	0.028571	0.805685	0.34	0.822069	0.415425	4.71e-05	0.2204	-3.486	0.978962	0.0826169
FB-CM	PRKCA-RAB37	33.7329	5.4344	3.1e-07	0.000301142	5.9261	5.6922	0.001086	0.7444	0.026519	0.805685	0.48	0.9325	0.711997	0.000325674	0.1412	2.9208	0.981933	0.188843
FB-CM	MAPK14-MAOA	-42.8812	7.0529	6.04e-07	0.000523886	-5.7628	7.4411	0.003012	0.912738	0.028571	0.805685	0.16	0.615014	0.0474511	0.000171105	0.4539	-4.9595	0.963808	0.142091
FB-CM	PAK2-MYC	-54.5603	10.1786	3.83e-06	0.00249693	-5.1522	10.5897	0.007407	0.912738	0.028571	0.805685	0.56	0.979773	0.767897	0.000695076	-0.0609	-5.46	0.984537	0.267714
FB-CM	RAF1-MYC	-49.1795	9.5569	2.6e-05	0.0122056	-4.8936	10.0497	0.008006	0.912738	0.028571	0.805685	0.9	1	0.488373	0.000695076	0.1382	-5.46	0.978962	0.267714
FB-CM	PAK1-RUNX3	-9.4159	1.7417	4.94e-05	0.0208324	-7.8157	1.2047	0.000233	0.587466	0.028571	0.805685	0.56	0.979773	0.0575993	0.00106344	-0.5277	-1.1736	0.963808	0.316422
FB-CM	AURKA-SPAG5	-14.8585	2.6557	1.49e-05	0.00769738	-5.0281	2.9551	0.013593	0.912738	0.028571	0.805685	0.46	0.917918	0.00445218	4.11e-05	-2.0727	-3.565	0.543296	0.0784444
FB-CM	ATM-CROCC	19.0969	3.724	9.55e-05	0.0355212	5.8053	3.2896	0.002128	0.864263	0.028571	0.805685	0.6	1	0.526941	0.000688145	0.1793	2.1354	0.978962	0.266427
FB-CM	PRKACA-AQP4	39.6533	8.1625	3.07e-05	0.0140407	4.8223	8.2229	0.015907	0.912738	0.029401	0.805685	0.96	1	0.901987	0.000907156	0.0573	5.3614	0.994202	0.296302
FB-CM	ACP1-SLC4A1	18.2985	2.9492	5.31e-08	6.74e-05	6.3908	2.8633	0.001189	0.761403	0.026519	0.805685	0.64	1	0.667919	0.000203193	-0.1802	2.5992	0.980642	0.154518
FB-CM	PPP2CA-MYC	-49.5932	9.2474	1.03e-05	0.00567183	-4.7385	10.466	0.005713	0.912738	0.028571	0.805685	0.44	0.903094	0.920748	0.000695076	-0.0263	-5.46	0.995237	0.267714
FB-CM	PRKCA-FGF2	29.4309	5.1383	2.83e-08	3.92e-05	6.6505	4.4254	0.000788	0.682245	0.028571	0.805685	0.2	0.676998	0.711997	0.000169963	0.1412	2.4658	0.981933	0.142031
FB-CM	CHEK2-BRCA2	-21.9828	3.0055	2.4e-11	9.09e-08	-8.017	2.742	0.000291	0.615161	0.028571	0.805685	0.98	1	0.0471996	6.04e-06	-0.6354	-2.8445	0.963808	0.0368424
FB-CM	ZHX2-MYC	-52.7276	10.389	5.28e-05	0.0219579	-4.9629	10.6244	0.010295	0.912738	0.028571	0.805685	1	1	0.263356	0.000695076	0.3288	-5.46	0.975454	0.267714
FB-CM	KAT2B-MYC	-53.9065	10.7103	3.36e-05	0.0151302	-4.8971	11.0078	0.014077	0.912738	0.028571	0.805685	0.98	1	0.122452	0.000695076	0.571	-5.46	0.963808	0.267714
FB-CM	CSNK2A2-MYC	-47.3438	8.6109	9.39e-06	0.00524116	-5.1692	9.1587	0.006387	0.912738	0.028571	0.805685	0.64	1	0.448422	0.000695076	-0.1583	-5.46	0.978962	0.267714
FB-CM	ATM-SLC4A1	21.8879	3.4102	5.3e-07	0.00047086	7.2554	3.0168	0.000607	0.645877	0.026519	0.805685	0.02	0.195524	0.526941	0.000203193	0.1793	2.5992	0.978962	0.154518
FB-CM	CAMK2D-KCND2	22.2173	4.6784	0.000105179	0.0383366	5.2821	4.2062	0.002492	0.894756	0.028571	0.805685	0.92	1	0.394688	0.000290089	0.2018	1.7398	0.978962	0.179411
FB-CM	CDC42BPA-ARHGEF2	-34.6397	5.5274	1.03e-07	0.000118506	-6.4429	5.3764	0.000763	0.680079	0.028571	0.805685	0.68	1	0.406921	4.71e-05	0.2732	-3.486	0.978962	0.0826169
FB-CM	CDK2-MAP1B	-20.086	3.2637	4.16e-06	0.00266341	-6.6885	3.003	0.001362	0.783431	0.028571	0.805685	0.74	1	0.446996	0.000106309	-0.1808	-3.3349	0.978962	0.126527
FB-CM	CDK2-MYB	8.4498	1.7464	3.3e-05	0.0149146	5.5689	1.5173	0.003846	0.912738	0.026519	0.805685	0.7	1	0.446996	0.0013296	-0.1808	1.5503	0.978962	0.34682
FB-CM	CSNK1A1-SLC24A2	-46.6065	4.7603	0	0	-9.5576	4.8764	0.000535	0.643809	0.028571	0.805685	0.5	0.944488	0.792703	6.35e-06	-0.057	-4.1808	0.986188	0.0368424
FB-CM	CSNK1D-PHF10	-19.9898	3.3325	9.33e-07	0.000751549	-6.6492	3.0063	0.000811	0.690042	0.028571	0.805685	1	1	0.494388	0.000224332	-0.1272	-2.2146	0.978962	0.15975
FB-CM	CSNK1D-SLC4A1	21.7673	3.3088	9e-08	0.000105436	6.7236	3.2374	0.000988	0.724964	0.026519	0.805685	0.16	0.615014	0.494388	0.000203193	-0.1272	2.5992	0.978962	0.154518
FB-CM	CSNK1E-MAP1B	-26.0311	4.3965	2.56e-05	0.0120767	-5.1955	5.0104	0.002031	0.856413	0.028571	0.805685	0.16	0.615014	0.709219	0.000106309	0.0868	-3.3349	0.981933	0.126527
FB-CM	CSNK2A1-SLC4A1	24.7414	3.6409	3.09e-09	6.03e-06	6.7629	3.6584	0.000763	0.680079	0.026519	0.805685	0.34	0.822069	0.767788	0.000203193	0.0591	2.5992	0.984537	0.154518
FB-CM	CSNK2A2-EIF2S2	-24.0474	3.8282	1.52e-07	0.000165393	-7.4564	3.2251	0.000316	0.622241	0.028571	0.805685	0.26	0.750887	0.448422	0.000125164	-0.1583	-2.6327	0.978962	0.133378
FB-CM	CSNK2A2-MYB	13.038	2.6566	0.00013841	0.0476548	5.3946	2.4168	0.003749	0.912738	0.026519	0.805685	0.1	0.497333	0.448422	0.0013296	-0.1583	1.5503	0.978962	0.34682
FB-CM	CSNK2A2-PHLDB2	-18.6829	3.5708	5.77e-05	0.0236306	-6.8934	2.7103	0.000755	0.67719	0.028571	0.805685	0.6	1	0.448422	0.000318088	-0.1583	-1.9736	0.978962	0.187307
FB-CM	GSK3B-ARHGEF2	-37.7144	5.0441	2.12e-10	6.09e-07	-8.075	4.6705	0.000381	0.630603	0.028571	0.805685	0.3	0.789097	0.922235	4.71e-05	-0.0215	-3.486	0.995237	0.0826169
FB-CM	GSK3B-MYB	16.6021	3.2185	1.87e-05	0.00930844	5.352	3.1021	0.004003	0.912738	0.026519	0.805685	0.66	1	0.922235	0.0013296	-0.0215	1.5503	0.995237	0.34682
FB-CM	IGF1R-CD28	22.7529	4.1174	7.42e-06	0.00430632	6.4117	3.5487	0.002402	0.886885	0.028571	0.805685	1	1	0.322396	0.000230699	0.3245	1.7083	0.978962	0.161124
FB-CM	INSR-ROS1	-37.6785	5.909	2.34e-09	4.75e-06	-6.8346	5.5129	0.000614	0.647679	0.028571	0.805685	0.78	1	0.0689652	0.000120045	0.5135	-4.0883	0.963808	0.132547
FB-CM	MAP3K2-RIPK4	32.0289	5.7285	9.14e-06	0.00512349	5.3538	5.9824	0.003144	0.912738	0.026519	0.805685	0.26	0.750887	0.603544	0.000713996	0.131	3.2696	0.979433	0.270386
FB-CM	MAPK1-UNG	18.5298	2.8687	1.69e-08	2.52e-05	10.1477	1.826	5.4e-05	0.370728	0.028571	0.805685	1	1	0.688446	0.000112398	0.0841	1.8407	0.981022	0.129297
FB-CM	MAPK14-MYB	14.8449	3.1209	0.000138609	0.047709	5.697	2.6057	0.002971	0.912738	0.026519	0.805685	0.3	0.789097	0.0474511	0.0013296	0.4539	1.5503	0.963808	0.34682
FB-CM	MAPK14-MYC	-47.9546	9.4372	6.4e-05	0.0257402	-4.6505	10.3117	0.011244	0.912738	0.028571	0.805685	0.6	1	0.0474511	0.000695076	0.4539	-5.46	0.963808	0.267714
FB-CM	MAPK14-SMTN	21.8932	3.3786	1.18e-07	0.000133092	13.5394	1.617	5.5e-05	0.371403	0.028571	0.805685	0.14	0.580719	0.0474511	0.000143852	0.4539	1.7352	0.963808	0.139189
FB-CM	MAPK14-UNG	20.5217	2.7347	5e-12	2.22e-08	14.8177	1.3849	7.3e-05	0.393317	0.028571	0.805685	0.74	1	0.0474511	0.000112398	0.4539	1.8407	0.963808	0.129297
FB-CM	MAPK8-MAP1B	-28.3744	4.891	4.98e-06	0.00308837	-6.4226	4.4179	0.000789	0.682245	0.028571	0.805685	0.52	0.957827	0.680434	0.000106309	0.1222	-3.3349	0.981006	0.126527
FB-CM	PRKACB-PHKG1	23.2314	4.581	1.81e-05	0.00908131	4.8269	4.8129	0.01444	0.912738	0.028571	0.805685	0.3	0.789097	0.361704	0.000805414	0.2023	2.3621	0.978962	0.281901
FB-CM	PRKACB-SCN4A	60.2868	10.8073	3.61e-06	0.00238105	4.9183	12.2577	0.012768	0.912738	0.029401	0.805685	0.54	0.967114	0.361704	0.000793936	0.2023	6.6493	0.978962	0.281901
FB-CM	PRKCA-ARHGEF17	44.2169	7.7306	2.04e-06	0.00146534	4.9699	8.8969	0.014214	0.912738	0.028571	0.805685	0.08	0.450284	0.711997	0.000399574	0.1412	3.7956	0.981933	0.206108
FB-CM	PRKCA-EIF2S2	-28.9662	5.593	8.73e-05	0.033053	-4.9173	5.8907	0.006164	0.912738	0.028571	0.805685	0.54	0.967114	0.711997	0.000125164	0.1412	-2.6327	0.981933	0.133378
FB-CM	PRKCA-HDAC7	27.1534	4.7814	7.42e-06	0.00430483	6.6869	4.0607	0.004783	0.912738	0.028571	0.805685	0.42	0.887979	0.711997	0.000107699	0.1412	2.2595	0.981933	0.126885
FB-CM	PRKDC-AQP4	47.9523	9.2562	3.47e-05	0.0155441	4.8	9.99	0.013386	0.912738	0.029401	0.805685	0.88	1	0.313038	0.000907156	0.2408	5.3614	0.978962	0.296302
FB-CM	PRKDC-MAP1B	-27.0916	4.4844	2.34e-06	0.0016491	-7.1184	3.8058	0.000514	0.643809	0.028571	0.805685	0.46	0.917918	0.313038	0.000106309	0.2408	-3.3349	0.978962	0.126527
FB-CM	PRKDC-SLC4A1	23.2644	3.3819	2.35e-07	0.000238522	6.8964	3.3734	0.000674	0.657902	0.026519	0.805685	0.24	0.729859	0.313038	0.000203193	0.2408	2.5992	0.978962	0.154518
FB-CM	PRKG1-MAP1B	-39.088	6.8331	1.29e-05	0.00685929	-6.4449	6.0649	0.001007	0.728844	0.028571	0.805685	0.04	0.307385	0.48989	0.000106309	0.2818	-3.3349	0.978962	0.126527
FB-CM	PRKG1-PHKG1	33.0743	6.7834	5.19e-05	0.0216631	7.9248	4.1735	0.003911	0.912738	0.028571	0.805685	1	1	0.48989	0.000805414	0.2818	2.3621	0.978962	0.281901
FB-CM	RPS6KA3-ARHGEF2	-31.7342	5.3115	1.15e-06	0.000898697	-7.3004	4.3469	0.001248	0.771596	0.028571	0.805685	1	1	0.248848	4.71e-05	0.3728	-3.486	0.973243	0.0826169
FB-CM	RPS6KA3-HDAC4	21.2206	4.3413	9.42e-05	0.035151	5.6871	3.7314	0.002872	0.912738	0.028571	0.805685	0.58	0.993964	0.248848	0.000248293	0.3728	1.6519	0.973243	0.169866
FB-CM	RPS6KA3-HDAC7	26.302	4.1248	5.74e-08	7.18e-05	5.9656	4.409	0.001499	0.800881	0.028571	0.805685	1	1	0.248848	0.000107699	0.3728	2.2595	0.973243	0.126885
FB-CM	RPS6KA3-MAP1B	-30.6448	5.413	1.16e-06	0.000906058	-6.7355	4.5497	0.000569	0.643809	0.028571	0.805685	0.56	0.979773	0.248848	0.000106309	0.3728	-3.3349	0.973243	0.126527
FB-CM	RPS6KA3-SCN4A	69.4381	12.4979	0.000104038	0.0380174	4.6854	14.8201	0.010356	0.912738	0.029401	0.805685	0.46	0.917918	0.248848	0.000793936	0.3728	6.6493	0.973243	0.281901
FB-CM	RPS6KA3-SLC24A2	-38.4453	5.2627	2.67e-09	5.33e-06	-7.216	5.3278	0.000376	0.629432	0.028571	0.805685	0.56	0.979773	0.248848	6.35e-06	0.3728	-4.1808	0.973243	0.0368424
FB-CM	SRC-MAP1B	-17.9889	3.5625	9.18e-05	0.0344552	-6.4709	2.78	0.003235	0.912738	0.028571	0.805685	0.14	0.580719	0.0868651	0.000106309	0.4189	-3.3349	0.963808	0.126527
FB-CM	CDK5-MYC	-32.3206	6.2616	2.51e-05	0.0118771	-4.2102	7.6767	0.006512	0.912738	0.028571	0.805685	0.06	0.384333	0.738807	0.000695076	-0.1094	-5.46	0.983072	0.267714
FB-CM	DYRK2-MYC	-39.0302	7.6046	8.2e-05	0.0314398	-4.4364	8.7976	0.004881	0.912738	0.028571	0.805685	0.38	0.852867	0.983938	0.000695076	0.0089	-5.46	0.999242	0.267714
FB-CM	PRKACA-MYB	11.6491	2.3545	5.85e-05	0.0238874	5.7905	2.0117	0.001792	0.832053	0.026519	0.805685	0.46	0.917918	0.901987	0.0013296	0.0573	1.5503	0.994202	0.34682
FB-CM	DYRK1A-MAP1B	-29.8598	5.2594	4.37e-06	0.00277447	-7.2931	4.0943	0.001093	0.745565	0.028571	0.805685	0.54	0.967114	0.187082	0.000106309	0.3737	-3.3349	0.965251	0.126527
FB-CM	MAPK1-MAP1B	-31.5617	4.7743	7.78e-07	0.000644456	-7.3334	4.3038	0.000599	0.643809	0.028571	0.805685	1	1	0.688446	0.000106309	0.0841	-3.3349	0.981022	0.126527
FB-CM	ATR-BRCA2	-24.3237	3.3452	1.32e-10	4.02e-07	-8.5016	2.8611	0.000376	0.629432	0.028571	0.805685	0.64	1	0.933834	6.04e-06	0.0225	-2.8445	0.996329	0.0368424
FB-CM	MAPK1-SNED1	22.5019	3.7864	2.98e-07	0.000291378	7.315	3.0761	0.000333	0.62751	0.028571	0.805685	0.26	0.750887	0.688446	0.000161195	0.0841	2.2258	0.981022	0.140335
FB-CM	MARK3-HDAC7	24.4588	3.7607	1.69e-06	0.00124607	6.8808	3.5547	0.001082	0.743138	0.028571	0.805685	0.36	0.838242	0.415425	0.000107699	0.2204	2.2595	0.978962	0.126885
FB-CM	MAPK1-ARHGEF17	37.3301	6.1993	5.59e-07	0.000491701	5.365	6.9581	0.010019	0.912738	0.028571	0.805685	0.64	1	0.688446	0.000399574	0.0841	3.7956	0.981022	0.206108
FB-CM	PKD1-HDAC7	23.7213	3.8445	9.38e-07	0.00075489	8.1922	2.8956	0.001365	0.783789	0.028571	0.805685	1	1	0.875445	0.000107699	-0.0398	2.2595	0.991856	0.126885
FB-CM	CDK2-SUV39H1	21.8286	4.1521	2.07e-06	0.00147903	4.8606	4.4909	0.011346	0.912738	0.028571	0.805685	0.02	0.195524	0.446996	0.000673608	-0.1808	4.0515	0.978962	0.265524
FB-CM	DYRK1A-MYC	-52.259	10.2796	4.42e-05	0.0190448	-4.9485	10.5606	0.012456	0.912738	0.028571	0.805685	0.64	1	0.187082	0.000695076	0.3737	-5.46	0.965251	0.267714
FB-CM	FYN-CD28	23.303	3.6917	3.72e-07	0.000351807	7.3082	3.1886	0.000736	0.674854	0.028571	0.805685	1	1	0.0908627	0.000230699	0.519	1.7083	0.963808	0.161124
FB-CM	GSK3B-PRLR	28.0033	5.1055	2.7e-06	0.00185557	5.2607	5.3231	0.00333	0.912738	0.028571	0.805685	0.4	0.869191	0.922235	0.00045182	-0.0215	2.6281	0.995237	0.217937
FB-CM	EIF5-EIF2S2	-27.5985	4.9201	1.09e-06	0.000857019	-5.7664	4.7861	0.001301	0.774959	0.028571	0.805685	0.3	0.789097	0.289224	0.000125164	-0.4219	-2.6327	0.978962	0.133378
FB-CM	PRKCD-RIPK4	24.1038	4.5798	3.12e-05	0.0142119	4.848	4.9719	0.004076	0.912738	0.026519	0.805685	0.1	0.497333	0.583623	0.000713996	-0.1335	3.2696	0.979433	0.270386
FB-CM	SP1-MYC	-47.2749	8.4953	1.14e-06	0.000891667	-4.6385	10.1917	0.005654	0.912738	0.028571	0.805685	0.34	0.822069	0.753498	0.000695076	0.0878	-5.46	0.983861	0.267714
FB-CM	RELA-MYC	-42.2995	7.8166	1.37e-05	0.00720656	-4.9263	8.5864	0.006005	0.912738	0.028571	0.805685	0.02	0.195524	0.600277	0.000695076	-0.1143	-5.46	0.979433	0.267714
FB-CM	UBE2I-MYB	12.6118	2.6621	0.000121081	0.0428117	5.2966	2.3811	0.004142	0.912738	0.026519	0.805685	0.44	0.903094	0.293917	0.0013296	-0.2159	1.5503	0.978962	0.34682
FB-CM	NMI-MYC	-40.7676	7.617	2.12e-05	0.0103132	-4.7373	8.6057	0.006289	0.912738	0.028571	0.805685	0.24	0.729859	0.932012	0.000695076	0.0248	-5.46	0.996125	0.267714
FB-CM	CBL-EGF	19.8318	3.3569	7.39e-08	8.91e-05	8.1759	2.4256	0.001264	0.772292	0.028571	0.805685	0.5	0.944488	0.955808	0.000123852	0.0113	2.1307	0.998048	0.132683
FB-CM	GRB2-EGF	20.2818	3.5262	3.21e-05	0.014584	6.6877	3.0327	0.002202	0.869356	0.028571	0.805685	1	1	0.570047	0.000123852	0.1328	2.1307	0.979433	0.132683
FB-CM	CBLB-EGF	28.1138	5.142	4.5e-05	0.0193015	5.562	5.0546	0.005315	0.912738	0.028571	0.805685	1	1	0.253779	0.000123852	0.5005	2.1307	0.973606	0.132683
FB-CM	CTNNB1-MYC	-52.5782	9.6221	1.2e-06	0.000929086	-4.6401	11.3312	0.003925	0.912738	0.028571	0.805685	0.44	0.903094	0.259733	0.000695076	-0.5038	-5.46	0.974822	0.267714
FB-CM	MAPK1-HDAC4	17.0159	3.4088	4.33e-05	0.0187144	5.5945	3.0416	0.001595	0.812882	0.028571	0.805685	1	1	0.688446	0.000248293	0.0841	1.6519	0.981022	0.169866
FB-CM	MAPK1-FHL3	27.9324	4.72	6.24e-07	0.000536808	6.1268	4.5591	0.001376	0.784935	0.028571	0.805685	0.42	0.887979	0.688446	0.000461167	0.0841	2.8197	0.981022	0.220504
FB-CM	YY1-MYC	-49.5435	8.7404	2.22e-05	0.010701	-4.9287	10.0521	0.005971	0.912738	0.028571	0.805685	0.72	1	0.835762	0.000695076	-0.0398	-5.46	0.989687	0.267714
FB-CM	PML-ELF4	-22.4377	4.209	2.1e-05	0.010245	-5.8111	3.8612	0.002461	0.892553	0.028571	0.805685	0.92	1	0.493474	0.000736626	-0.1565	-2.6639	0.978962	0.272381
FB-CM	CDKN1B-CCND2	-29.9087	5.5291	5.44e-06	0.0033302	-5.5974	5.3433	0.002141	0.864402	0.028571	0.805685	0.38	0.852867	0.398381	0.0005557	-0.206	-3.2642	0.978962	0.238718
FB-CM	MYCBP-MYC	-39.1146	6.2322	8.97e-08	0.000105272	-5.7061	6.8549	0.00161	0.814054	0.028571	0.805685	0.34	0.822069	0.029001	0.000695076	-0.8515	-5.46	0.927927	0.267714
FB-CM	CREBBP-MYC	-59.9335	11.242	8.64e-06	0.0048863	-5.1089	11.7312	0.010569	0.912738	0.028571	0.805685	0.14	0.580719	0.504064	0.000695076	0.1859	-5.46	0.978962	0.267714
FB-CM	HDAC2-MYC	-44.2732	7.8011	2.15e-05	0.0104524	-4.9788	8.8923	0.005121	0.912738	0.028571	0.805685	0.52	0.957827	0.412874	0.000695076	-0.1669	-5.46	0.978962	0.267714
FB-CM	SIAH1A-TRIB3	-81.9835	6.9246	0	0	-11.3081	7.25	0.000707	0.668719	0.029401	0.805685	1	1	0.884462	2.69e-06	0.0284	-9.9775	0.992562	0.0254785
FB-CM	ABL1-ROS1	-35.9231	5.4077	1.26e-08	1.97e-05	-7.1112	5.0516	0.000483	0.643676	0.028571	0.805685	0.3	0.789097	0.118404	0.000120045	0.3916	-4.0883	0.963808	0.132547
FB-CM	TNK1-PLCG1	21.4326	4.2432	6.37e-05	0.0256459	4.8181	4.4483	0.002987	0.912738	0.026519	0.805685	0.2	0.676998	0.00144954	0.0947071	2.1747	0.4675	0.359821	0.963808
FB-CM	MAP2K1-MYC	-45.8749	8.6077	8.48e-06	0.00481079	-4.7739	9.6096	0.008079	0.912738	0.028571	0.805685	0.12	0.539527	0.246038	0.000695076	0.2396	-5.46	0.972914	0.267714
FB-CM	PRKCA-SCTR	-49.2615	9.9921	5.8e-05	0.0237375	-4.4456	11.081	0.014342	0.912738	0.028571	0.805685	0.28	0.769683	0.711997	0.00121675	0.1412	-4.3793	0.981933	0.337902
FB-CM	MOK-MYC	-28.2633	5.9522	5.5e-05	0.0227114	-5.1905	5.4452	0.003588	0.912738	0.028571	0.805685	1	1	0.876518	0.000695076	-0.0846	-5.46	0.991896	0.267714
FB-CM	TGFB3-TGFB2	-17.1645	3.6262	0.000101924	0.0373986	-5.9278	2.8956	0.001524	0.802608	0.028571	0.805685	0.6	1	0.123	0.00232003	-0.3369	-1.766	0.963808	0.427783
FB-CM	ACVR2B-IGSF1	32.4875	5.9178	3.01e-05	0.0137808	5.7147	5.6849	0.002098	0.859801	0.026519	0.805685	0.76	1	0.0164916	0.000428072	0.8434	4.8488	0.821089	0.21205
FB-CM	CASK-KCNJ2	25.7524	4.4601	8.67e-06	0.00490058	8.927	2.8848	0.001343	0.780265	0.028571	0.805685	0.44	0.903094	0.34669	0.00020073	0.3201	2.0848	0.978962	0.153298
FB-CM	CSNK1A1-ADAP1	-28.2123	5.8275	1.51e-05	0.0077821	-4.4235	6.3779	0.010771	0.912738	0.028571	0.805685	0.08	0.450284	0.792703	0.00157892	-0.057	-2.5417	0.986188	0.376819
FB-CM	CAMK2G-TIAM1	13.5003	2.7842	7.32e-05	0.028732	5.3999	2.5001	0.002065	0.859423	0.028571	0.805685	0.26	0.750887	0.282428	0.000727396	0.2576	1.3294	0.978556	0.271758
FB-CM	PRKDC-EIF2S2	-20.6719	4.0188	1.32e-05	0.00697801	-5.9101	3.4977	0.001098	0.746042	0.028571	0.805685	0.14	0.580719	0.313038	0.000125164	0.2408	-2.6327	0.978962	0.133378
FB-CM	ACVR1-IGSF1	46.162	7.3694	9.65e-08	0.000112093	5.4266	8.5066	0.003667	0.912738	0.026519	0.805685	1	1	0.779831	0.000428072	0.059	4.8488	0.985147	0.21205
FB-CM	MAP2K2-CNKSR1	-16.0185	3.1536	0.000141376	0.048459	-5.2264	3.0649	0.002592	0.903167	0.028571	0.805685	0.28	0.769683	0.140293	0.00089197	-0.4153	-1.7123	0.963808	0.293226
FB-CM	CSNK2A1-FGF2	23.7654	3.7232	1.08e-07	0.000123075	7.5723	3.1385	0.000363	0.629432	0.028571	0.805685	0.4	0.869191	0.767788	0.000169963	0.0591	2.4658	0.984537	0.142031
FB-CM	ACVR2A-IGSF1	43.4812	7.1186	4.3e-07	0.00039646	5.2593	8.2675	0.003763	0.912738	0.026519	0.805685	1	1	0.73285	0.000428072	0.0857	4.8488	0.982594	0.21205
FB-CM	CSNK2A2-FGF2	19.7569	3.4191	3.6e-07	0.000342543	7.8257	2.5246	0.000236	0.588724	0.028571	0.805685	1	1	0.448422	0.000169963	-0.1583	2.4658	0.978962	0.142031
FB-CM	CSNK2A1-CUX2	17.7507	3.4132	2.82e-05	0.0130731	7.1688	2.4761	0.001354	0.782517	0.028571	0.805685	0.02	0.195524	0.767788	0.000238868	0.0591	1.8054	0.984537	0.165422
FB-CM	PARP10-MYC	-35.5115	6.746	2.04e-05	0.00998307	-4.8262	7.3581	0.00964	0.912738	0.028571	0.805685	0.66	1	0.633129	0.000695076	0.1101	-5.46	0.979796	0.267714
FB-CM	GNB1-CACNA1A	-16.7363	3.3125	9.24e-06	0.00516595	-5.4689	3.0603	0.001577	0.810983	0.028571	0.805685	0.6	1	0.769147	0.000361653	0.0605	-1.6589	0.984537	0.196913
FB-CM	RPS6KA3-FGF2	28.0495	4.366	3.84e-07	0.000360792	5.433	5.1628	0.001624	0.814054	0.028571	0.805685	1	1	0.248848	0.000169963	0.3728	2.4658	0.973243	0.142031
FB-CM	EP300-MYC	-52.0157	9.1693	2.31e-05	0.0110878	-4.9128	10.5877	0.007465	0.912738	0.028571	0.805685	0.2	0.676998	0.914904	0.000695076	0.02	-5.46	0.995165	0.267714
FB-CM	BCL2-MYC	-56.9668	10.7158	7.22e-06	0.00421116	-5.2168	10.9198	0.011625	0.912738	0.028571	0.805685	1	1	0.91824	0.000695076	0.0358	-5.46	0.995165	0.267714
FB-CM	AKT2-TRIB3	-78.4956	6.8715	0	0	-9.1322	8.5955	0.000114	0.459255	0.029401	0.805685	0.02	0.195524	0.661575	2.69e-06	0.1612	-9.9775	0.980642	0.0254785
FB-MES	MYB-COL1A2	11.4194	1.8468	3.31e-08	4.5e-05	9.8869	1.155	0.00166	0.817083	0.028571	0.805685	1	1	0.000151875	0.725278	1.5787	-0.2026	0.140107	0.981933
FB-MES	EGR1-DUSP4	13.7208	1.5778	0	0	10.5012	1.3066	0.000153	0.502682	0.026519	0.805685	0.28	0.769683	0.109706	3.21e-05	0.8627	1.481	0.963808	0.073114
FB-MES	MAPK1-DUSP4	14.4654	1.7054	0	0	13.2763	1.0896	1.2e-05	0.302882	0.026519	0.805685	0.14	0.580719	0.688446	3.21e-05	0.0841	1.481	0.981022	0.073114
FB-MES	MAPK3-DUSP4	9.7074	1.4629	5.84e-09	1.03e-05	12.5793	0.7717	2.4e-05	0.302882	0.026519	0.805685	0.58	0.993964	0.797294	3.21e-05	-0.2052	1.481	0.986704	0.073114
FB-MES	MAPK8-DUSP4	13.2682	1.5345	0	0	13.7295	0.9664	1.1e-05	0.302882	0.026519	0.805685	0.68	1	0.680434	3.21e-05	0.1222	1.481	0.981006	0.073114
FB-MES	EPHB3-EFNB3	6.6882	1.4981	6.5e-05	0.0260758	5.0612	1.3215	0.002439	0.889849	0.026519	0.805685	0.04	0.307385	0.142666	0.00144171	-0.3637	1.3479	0.963808	0.359357
FB-MES	MAPK8-DUSP10	21.9947	3.637	2.4e-06	0.00168435	5.9428	3.701	0.002636	0.906455	0.026519	0.805685	0.08	0.450284	0.680434	0.000355472	0.1222	2.4472	0.981006	0.195427
FB-MES	OSTN-NPR3	-47.4703	6.0742	1.17e-10	3.63e-07	-6.2494	7.5959	0.008089	0.912738	0.028571	0.805685	1	1	6.51e-05	0.120232	-5.4378	-0.4838	0.0978244	0.963808
FB-MES	MAPK14-DUSP10	23.4419	3.9372	8.57e-06	0.00485321	6.1671	3.8011	0.002844	0.912738	0.026519	0.805685	0.98	1	0.0474511	0.000355472	0.4539	2.4472	0.963808	0.195427
FB-MES	CDK2-CDK20	6.0998	1.0546	7.48e-07	0.000623545	7.7293	0.7892	0.000374	0.629432	0.028571	0.805685	1	1	0.446996	0.000317715	-0.1808	1.1274	0.978962	0.187307
FB-MES	PRKCA-ITPKA	18.5432	2.948	1.74e-07	0.000184759	6.6659	2.7818	0.000693	0.66424	0.026519	0.805685	0.26	0.750887	0.711997	0.000278102	0.1412	1.5941	0.981933	0.17718
FB-MES	ELAVL2-ADAM10	-19.8831	3.8157	5.51e-05	0.0227235	-5.0721	3.9201	0.012316	0.912738	0.028571	0.805685	0.36	0.838242	0.00063434	0.658902	-2.7036	0.1002	0.257228	0.980642
FB-MES	MAPK9-DUSP4	13.0462	1.531	0	0	13.2692	0.9832	1.1e-05	0.302882	0.026519	0.805685	0.5	0.944488	0.293093	3.21e-05	0.3229	1.481	0.978962	0.073114
FB-MES	MAPK14-DUSP4	14.1527	1.7435	0	0	13.5448	1.0449	1.1e-05	0.302882	0.026519	0.805685	1	1	0.0474511	3.21e-05	0.4539	1.481	0.963808	0.073114
FB-MES	EFNB3-EPHB1	27.3739	5.6738	3.33e-05	0.0150227	4.3326	6.3182	0.007299	0.912738	0.026519	0.805685	0.62	1	0.00216064	0.192647	3.7169	0.589	0.418331	0.966158
FB-MES	GDF15-TGFBR2	-50.9714	8.8893	1.5e-06	0.00112483	-4.6418	10.9809	0.01866	0.912738	0.028571	0.805685	0.98	1	0.000438574	0.533569	-6.8112	-0.184	0.214551	0.978962
FB-MES	MTOR-DUSP10	21.142	3.3434	1.16e-06	0.000907865	6.0123	3.5164	0.002808	0.912738	0.026519	0.805685	0.12	0.539527	0.455568	0.000355472	0.2038	2.4472	0.978962	0.195427
FB-MES	AURKB-CBX5	-17.0318	3.6985	6.37e-05	0.0256524	-4.063	4.192	0.006657	0.912738	0.028571	0.805685	0.28	0.769683	0.00282281	0.170946	-2.4592	-0.3575	0.461643	0.96521
FB-MES	PRKCQ-RASGRP1	7.9629	1.5335	0.000131815	0.0458687	6.8994	1.1542	0.000549	0.643809	0.028571	0.805685	1	1	0.324152	0.000496773	0.8494	1.347	0.978962	0.227201
FB-MES	NCK1-WAS	14.2024	3.2128	0.000134713	0.0466606	4.4334	3.2035	0.004897	0.912738	0.026519	0.805685	0.34	0.822069	0.428608	0.00238865	0.1695	1.4618	0.978962	0.432904
FB-MES	CSNK1E-CHEK2	-12.0906	2.7334	8.61e-05	0.0326825	-3.9055	3.0958	0.016588	0.912738	0.028571	0.805685	0.86	1	0.709219	0.00192499	0.0868	-1.5246	0.981933	0.402239
FB-MES	MAPK11-DUSP10	9.5047	1.669	5.09e-07	0.000455015	4.4453	2.1382	0.004797	0.912738	0.026519	0.805685	0.3	0.789097	0.702084	0.000355472	0.1684	2.4472	0.981226	0.195427
FB-MES	TNK1-PLCG1	10.2298	2.1075	8.4e-05	0.0320444	4.4386	2.3047	0.004389	0.912738	0.026519	0.805685	0.16	0.615014	0.00144954	0.445601	2.1747	-0.1783	0.359821	0.978962
FB-MES	MYB-CEBPB	6.0679	1.0957	1.09e-05	0.00593783	11.094	0.547	0.001125	0.751526	0.028571	0.805685	0.46	0.917918	0.000151875	0.818784	1.5787	-0.1228	0.140107	0.988433
FB-MES	SRC-ARR3	-11.238	1.9302	4.26e-06	0.00271838	-6.4704	1.7368	0.00136	0.783431	0.026519	0.805685	0.24	0.729859	0.0868651	0.000314962	0.4189	-1.78	0.963808	0.187307
FB-MES	MAPK3-DUSP10	15.9495	3.0821	9.57e-05	0.0355811	5.0967	3.1294	0.00433	0.912738	0.026519	0.805685	0.52	0.957827	0.797294	0.000355472	-0.2052	2.4472	0.986704	0.195427
FB-MES	AURKB-TACC1	-16.7414	3.8414	0.000123051	0.043364	-4.1536	4.0305	0.006195	0.912738	0.028571	0.805685	0.8	1	0.00282281	0.102559	-2.4592	-0.3784	0.461643	0.963808
FB-MES	CSNK2A1-ARR3	-16.8422	2.6899	1.79e-07	0.000189464	-5.9419	2.8345	0.003011	0.912738	0.026519	0.805685	0.08	0.450284	0.767788	0.000314962	0.0591	-1.78	0.984537	0.187307
FB-MES	MAP2K7-ARR3	-11.779	1.9768	4e-06	0.00257991	-5.474	2.1518	0.004803	0.912738	0.026519	0.805685	0.16	0.615014	0.171996	0.000314962	0.4188	-1.78	0.96521	0.187307
FB-EC	STAT1-MYC	-19.8217	4.2502	9.11e-05	0.03425	-4.0927	4.8432	0.010591	0.912738	0.028571	0.805685	0.54	0.967114	0.611706	0.00170444	-0.1312	-2.2749	0.979433	0.385563
FB-EC	GSK3B-MYC	-24.3895	5.1079	0.000146036	0.04972	-4.6224	5.2764	0.005312	0.912738	0.028571	0.805685	0.44	0.903094	0.922235	0.00170444	-0.0215	-2.2749	0.995237	0.385563
FB-EC	MYB-GATA3	6.3903	1.0507	1.85e-05	0.00921009	6.4364	0.9928	0.006536	0.912738	0.028571	0.805685	1	1	0.000151875	0.856193	1.5787	-0.0695	0.140107	0.989911
FB-EC	RUNX1-CD4	11.7635	1.9279	8.63e-07	0.000703277	4.4503	2.6433	0.020687	0.912738	0.028571	0.805685	0.5	0.944488	0.578881	0.000230903	0.4717	1.4901	0.979433	0.161124
FB-EC	MYB-COL1A2	13.2067	2.6264	1.48e-06	0.00111437	7.5866	1.7408	0.004696	0.912738	0.028571	0.805685	0.92	1	0.000151875	0.654555	1.5787	0.7559	0.140107	0.980425
FB-EC	COPS5-MYC	-19.7985	4.0139	2.2e-05	0.0106381	-4.3989	4.5008	0.008226	0.912738	0.028571	0.805685	1	1	0.147472	0.00170444	-0.3479	-2.2749	0.963808	0.385563
FB-EC	EGR1-DUSP4	24.4288	3.7718	2.61e-08	3.65e-05	7.3881	3.3065	0.000976	0.722595	0.026519	0.805685	0.22	0.701829	0.109706	0.000222495	0.8627	2.6339	0.963808	0.15975
FB-EC	AURKA-TPX2	-7.7739	1.5432	4.54e-05	0.0194512	-4.7834	1.6252	0.013526	0.912738	0.028571	0.805685	0.58	0.993964	0.00445218	0.00124239	-2.0727	-1.3096	0.543296	0.340563
FB-EC	CDK4-MYC	-16.424	3.3728	7.34e-05	0.028802	-3.5748	4.5944	0.023947	0.912738	0.028571	0.805685	0.5	0.944488	0.254012	0.00170444	-0.4773	-2.2749	0.973796	0.385563
FB-EC	CTNNB1-TCF7	25.8561	5.8398	0.000132115	0.045944	3.9728	6.5083	0.020041	0.912738	0.026519	0.805685	0.66	1	0.259733	0.00129342	-0.5038	3.0104	0.974822	0.342913
FB-EC	MAPK1-DUSP4	25.7758	3.9876	5.02e-07	0.000449718	6.1921	4.1627	0.001428	0.792617	0.026519	0.805685	0.16	0.615014	0.688446	0.000222495	0.0841	2.6339	0.981022	0.15975
FB-EC	MAPK3-DUSP4	17.2023	3.1582	3.77e-06	0.0024614	5.3459	3.2178	0.002495	0.894756	0.026519	0.805685	0.54	0.967114	0.797294	0.000222495	-0.2052	2.6339	0.986704	0.15975
FB-EC	MAPK8-DUSP4	23.6596	3.7707	1.43e-06	0.00108376	6.2413	3.7908	0.001388	0.785498	0.026519	0.805685	0.18	0.649903	0.680434	0.000222495	0.1222	2.6339	0.981006	0.15975
FB-EC	OSTN-NPR3	-61.0138	7.8795	2.82e-10	7.85e-07	-6.8645	8.8884	0.006195	0.912738	0.028571	0.805685	1	1	6.51e-05	0.372903	-5.4378	-0.4066	0.0978244	0.978962
FB-EC	CREBBP-TCF7	34.2184	6.7843	5.67e-05	0.0232979	4.5371	7.5418	0.012067	0.912738	0.026519	0.805685	0.14	0.580719	0.504064	0.00129342	0.1859	3.0104	0.978962	0.342913
FB-EC	GDF15-ERBB2	-31.6424	5.1827	2.32e-05	0.0110922	-4.7151	6.7109	0.017918	0.912738	0.028571	0.805685	1	1	0.000438574	0.255249	-6.8112	-0.2771	0.214551	0.974284
FB-EC	LFNG-NOTCH1	-18.517	3.7361	5.92e-05	0.0241217	-7.0491	2.6269	0.000634	0.649659	0.028571	0.805685	0.64	1	0.00127534	0.318697	-1.9549	-0.2892	0.342913	0.978962
FB-EC	UFD1-CD4	12.2286	1.9629	5.53e-05	0.0227993	7.3156	1.6716	0.004971	0.912738	0.028571	0.805685	0.02	0.195524	0.549813	0.000230903	0.1202	1.4901	0.978962	0.161124
FB-EC	SARM1-TICAM1	6.9195	1.2241	7.56e-06	0.00437322	4.4902	1.541	0.014245	0.912738	0.026519	0.805685	0.06	0.384333	0.000319839	0.801672	2.1716	-0.08	0.187307	0.986794
FB-EC	MLLT11-TCF7	17.1116	3.8118	8.22e-05	0.0315047	4.0895	4.1843	0.021809	0.912738	0.026519	0.805685	0.3	0.789097	0.255689	0.00129342	-0.3903	3.0104	0.974284	0.342913
FB-EC	CDK2-TPX2	-7.7642	1.5402	7.74e-05	0.0300249	-5.712	1.3593	0.005792	0.912738	0.028571	0.805685	1	1	0.446996	0.00124239	-0.1808	-1.3096	0.978962	0.340563
FB-EC	MAPK1-MYC	-21.7099	4.8606	7.89e-05	0.0305057	-4.5566	4.7645	0.005754	0.912738	0.028571	0.805685	0.6	1	0.688446	0.00170444	0.0841	-2.2749	0.981022	0.385563
FB-EC	CDR2-MYC	-19.0382	3.8541	5.18e-05	0.0216243	-5.0553	3.766	0.004544	0.912738	0.028571	0.805685	1	1	0.304859	0.00170444	-0.3508	-2.2749	0.978962	0.385563
FB-EC	LFNG-JAG1	-13.2988	2.9135	0.000133786	0.0463979	-4.9531	2.6849	0.002715	0.912246	0.028571	0.805685	0.22	0.701829	0.00127534	0.587017	-1.9549	0.1094	0.342913	0.979433
FB-EC	ELAVL2-ADAM10	-24.3093	4.4506	5.61e-06	0.00341293	-4.9276	4.9333	0.013864	0.912738	0.028571	0.805685	1	1	0.00063434	0.578233	-2.7036	0.1146	0.257228	0.979433
FB-EC	MAPK9-DUSP4	23.2865	3.6363	1.71e-09	3.63e-06	6.309	3.691	0.001237	0.769932	0.026519	0.805685	0.08	0.450284	0.293093	0.000222495	0.3229	2.6339	0.978962	0.15975
FB-EC	MAPK14-DUSP4	25.2053	3.9013	2.94e-07	0.000288277	6.5116	3.8708	0.001451	0.795999	0.026519	0.805685	0.14	0.580719	0.0474511	0.000222495	0.4539	2.6339	0.963808	0.15975
FB-EC	IL16-CD4	13.4715	2.0425	5.53e-08	6.95e-05	7.0736	1.9045	0.005527	0.912738	0.028571	0.805685	0.54	0.967114	0.413293	0.000230903	0.2325	1.4901	0.978962	0.161124
FB-EC	GDF15-RET	-33.624	6.6277	7.96e-05	0.030727	-3.345	10.0519	0.04402	0.912738	0.028571	0.805685	1	1	0.000438574	0.860754	-6.8112	0.1227	0.214551	0.990272
FB-EC	CXCL12-CD4	11.8228	2.5033	0.000109132	0.0395067	6.7466	1.7524	0.005933	0.912738	0.028571	0.805685	0.04	0.307385	0.61891	0.000230903	0.7765	1.4901	0.979433	0.161124
FB-EC	FGF7-NRP1	18.7855	3.1094	2.55e-07	0.000254976	7.3177	2.5671	0.000356	0.629432	0.028571	0.805685	0.34	0.822069	0.000131129	0.207275	1.3948	0.398	0.135025	0.968638
FB-EC	GDF15-TGFBR2	-60.4626	10.0411	4.83e-07	0.000436287	-5.1016	11.8517	0.014357	0.912738	0.028571	0.805685	0.3	0.789097	0.000438574	0.440806	-6.8112	0.1619	0.214551	0.978962
FB-EC	H2-DMA-CD4	9.9222	1.5866	9.2e-08	0.000107461	7.579	1.3092	0.004493	0.912738	0.028571	0.805685	0.62	1	0.726599	0.000230903	0.1153	1.4901	0.981933	0.161124
FB-EC	CADM1-CRTAM	13.6283	2.178	4.56e-08	5.91e-05	7.5352	1.8086	0.000444	0.642622	0.026519	0.805685	1	1	0.885367	0.000102648	-0.089	1.8451	0.992562	0.12574
FB-EC	NTRK3-CRTAM	15.8902	2.1054	3.45e-10	9.28e-07	8.6462	1.8378	0.000226	0.582291	0.026519	0.805685	1	1	0.0835565	0.000102648	0.5307	1.8451	0.963808	0.12574
FB-EC	PAK2-MYC	-22.6473	4.7864	4.96e-05	0.0209011	-4.5773	4.9477	0.005807	0.912738	0.028571	0.805685	1	1	0.767897	0.00170444	-0.0609	-2.2749	0.984537	0.385563
FB-EC	RAF1-MYC	-20.4175	4.2935	9.21e-05	0.0345291	-4.2284	4.8287	0.008517	0.912738	0.028571	0.805685	1	1	0.488373	0.00170444	0.1382	-2.2749	0.978962	0.385563
FB-EC	PRKCA-CD4	17.19	2.7599	3.99e-07	0.000372242	8.2318	2.0882	0.00347	0.912738	0.028571	0.805685	0.28	0.769683	0.711997	0.000230903	0.1412	1.4901	0.981933	0.161124
FB-EC	CDK2-MAPK4	13.1875	2.3852	2.66e-05	0.012445	4.686	2.8143	0.003892	0.912738	0.026519	0.805685	0.38	0.852867	0.446996	0.000621781	-0.1808	2.3951	0.978962	0.253631
FB-EC	GSK3B-TPX2	-14.1675	2.8629	0.000121431	0.0428984	-5.0984	2.7788	0.008073	0.912738	0.028571	0.805685	0.32	0.807536	0.922235	0.00124239	-0.0215	-1.3096	0.995237	0.340563
FB-EC	MAPK14-MAPK4	23.0163	4.3414	3.67e-05	0.0163144	5.121	4.4945	0.002369	0.882459	0.026519	0.805685	0.94	1	0.0474511	0.000621781	0.4539	2.3951	0.963808	0.253631
FB-EC	MAPK14-MYC	-19.6749	3.8553	3.81e-05	0.0168521	-4.1442	4.7476	0.007917	0.912738	0.028571	0.805685	0.9	1	0.0474511	0.00170444	0.4539	-2.2749	0.963808	0.385563
FB-EC	PAK2-MAPK4	23.6968	4.3784	2.68e-07	0.000266	5.2226	4.5373	0.001992	0.851748	0.026519	0.805685	0.8	1	0.767897	0.000621781	-0.0609	2.3951	0.984537	0.253631
FB-EC	MAPK1-TPX2	-12.4913	2.5702	0.000120553	0.0426791	-4.9032	2.5476	0.009496	0.912738	0.028571	0.805685	1	1	0.688446	0.00124239	0.0841	-1.3096	0.981022	0.340563
FB-EC	CTNNB1-MYC	-22.3754	4.5441	9.34e-05	0.0348915	-3.774	5.9289	0.0189	0.912738	0.028571	0.805685	0.38	0.852867	0.259733	0.00170444	-0.5038	-2.2749	0.974822	0.385563
FB-EC	YY1-MYC	-20.6517	4.467	0.000146629	0.0498447	-4.232	4.8799	0.009372	0.912738	0.028571	0.805685	1	1	0.835762	0.00170444	-0.0398	-2.2749	0.989687	0.385563
FB-EC	MYCBP-MYC	-16.9135	3.273	1.21e-05	0.00648143	-4.3809	3.8607	0.012816	0.912738	0.028571	0.805685	0.48	0.9325	0.029001	0.00170444	-0.8515	-2.2749	0.927927	0.385563
FB-EC	PTPRC-CD4	11.9812	2.3279	9.29e-05	0.0347694	4.7201	2.5384	0.017373	0.912738	0.028571	0.805685	0.36	0.838242	0.652061	0.000230903	0.6285	1.4901	0.980425	0.161124
FB-MAC	MYB-COL1A2	13.2528	2.6949	4.36e-05	0.0188141	7.3531	1.8023	0.005105	0.912738	0.028571	0.805685	0.86	1	0.000151875	0.985337	1.5787	0.0288	0.140107	0.999242
FB-MAC	JAK2-IL5RA	21.0256	3.3691	4.98e-08	6.38e-05	6.5364	3.2167	0.000678	0.65946	0.026519	0.805685	0.06	0.384333	0.592658	0.000252957	0.1423	2.2758	0.979433	0.170888
FB-MAC	AURKB-RACGAP1	-17.4518	3.6791	3.87e-05	0.0170471	-4.3612	4.0016	0.006995	0.912738	0.028571	0.805685	0.6	1	0.00282281	0.0972046	-2.4592	-1.0812	0.461643	0.963808
FB-MAC	EGFR-BTC	28.4272	5.3158	9.36e-05	0.0349638	6.063	4.6887	0.000913	0.715496	0.026519	0.805685	0.18	0.649903	0.4142	0.000551935	0.543	2.4009	0.978962	0.238217
FB-MAC	OSTN-NPR3	-46.2618	6.8176	1.11e-08	1.77e-05	-4.1447	11.1617	0.025356	0.912738	0.028571	0.805685	0.32	0.807536	6.51e-05	0.481521	-5.4378	-0.7447	0.0978244	0.978962
FB-MAC	PRKCA-NFASC	21.7834	3.8358	4.71e-06	0.0029488	5.5934	3.8945	0.001828	0.83561	0.029401	0.805685	0.52	0.957827	0.711997	0.000570396	0.1412	1.8756	0.981933	0.241762
FB-MAC	SNTA1-SCN4A	18.0967	3.7045	4.39e-05	0.018932	4.8049	3.7663	0.017083	0.912738	0.028571	0.805685	1	1	0.555653	0.000698893	-0.4033	3.0279	0.979194	0.267737
FB-MAC	LFNG-NOTCH1	-15.964	3.3481	4.66e-05	0.0199055	-5.0408	3.167	0.002469	0.892719	0.028571	0.805685	1	1	0.00127534	0.946415	-1.9549	0.0141	0.342913	0.99709
FB-MAC	FGF11-SCN4A	14.418	2.771	1.74e-05	0.00875774	4.9587	2.9076	0.015701	0.912738	0.028571	0.805685	1	1	0.0441216	0.000698893	2.0103	3.0279	0.963808	0.267737
FB-MAC	AURKB-NDC80	-16.9579	3.9607	0.000125466	0.0440362	-3.9013	4.3467	0.010401	0.912738	0.028571	0.805685	0.84	1	0.00282281	0.328051	-2.4592	-0.6412	0.461643	0.978962
FB-MAC	NEDD4L-SCN4A	31.2745	5.3866	1.84e-06	0.00134104	4.9866	6.2717	0.01546	0.912738	0.028571	0.805685	0.9	1	0.176109	0.000698893	0.411	3.0279	0.965251	0.267737
FB-MAC	ADAM10-BTC	22.6008	4.1515	9.3e-05	0.034774	5.4088	4.1785	0.001804	0.83272	0.026519	0.805685	0.34	0.822069	0.468797	0.000551935	-0.16	2.4009	0.978962	0.238217
FB-MAC	SARM1-TICAM1	8.7116	1.7416	2.91e-05	0.0133874	5.7526	1.5144	0.004112	0.912738	0.026519	0.805685	0.08	0.450284	0.000319839	0.993816	2.1716	0.0048	0.187307	0.999509
FB-MAC	SRC-KCNB1	14.0219	3.2175	0.000122171	0.0430862	6.0414	2.321	0.001351	0.782047	0.028571	0.805685	0.26	0.750887	0.0868651	0.00501434	0.4189	1.6437	0.963808	0.561086
FB-MAC	DLG4-LRFN2	26.6318	4.0178	1.57e-08	2.37e-05	6.4778	4.1112	0.004438	0.912738	0.028571	0.805685	0.3	0.789097	0.114421	0.000310755	0.498	2.7895	0.963808	0.186543
FB-MAC	ELAVL2-ADAM10	-25.6974	4.7064	6.48e-06	0.00385526	-5.1229	5.0162	0.009658	0.912738	0.028571	0.805685	1	1	0.00063434	0.743941	-2.7036	-0.0766	0.257228	0.983695
FB-MAC	EFNB3-EPHB1	28.9223	6.0913	0.000111771	0.040261	4.5714	6.3268	0.005374	0.912738	0.026519	0.805685	0.3	0.789097	0.00216064	0.00974214	3.7169	0.9386	0.418331	0.706522
FB-MAC	CALM2-SCN4A	28.3318	5.6701	5.12e-05	0.021433	4.7063	6.0199	0.018097	0.912738	0.028571	0.805685	0.32	0.807536	0.421641	0.000698893	-0.3738	3.0279	0.978962	0.267737
FB-MAC	FGF7-NRP1	18.57	2.9699	1.15e-07	0.000129812	7.9131	2.3467	0.000237	0.589434	0.028571	0.805685	1	1	0.000131129	0.313556	1.3948	0.2678	0.135025	0.978962
FB-MAC	ERBB2-BTC	14.0794	2.5489	4.03e-06	0.00259651	5.9393	2.3706	0.001365	0.783789	0.026519	0.805685	0.26	0.750887	0.294178	0.000551935	0.3782	2.4009	0.978962	0.238217
FB-MAC	GDF15-TGFBR2	-69.636	11.8122	6.38e-08	7.86e-05	-5.4449	12.7891	0.011976	0.912738	0.028571	0.805685	0.22	0.701829	0.000438574	0.916855	-6.8112	0.0374	0.214551	0.995165
FB-MAC	NRP2-NFASC	17.1743	3.3735	2.2e-05	0.0106091	5.766	2.9785	0.003387	0.912738	0.029401	0.805685	0.62	1	0.333344	0.000570396	1.0183	1.8756	0.978962	0.241762
FB-MAC	ACVR1-UBA52	-19.5069	4.2858	0.00014212	0.0486633	-5.5368	3.5232	0.001548	0.805763	0.028571	0.805685	0.06	0.384333	0.779831	0.000957735	0.059	-2.0998	0.985147	0.300242
FB-MAC	EGFR-GPRC5A	25.2929	4.5082	1.9e-06	0.0013778	5.6497	4.4768	0.001328	0.776788	0.029401	0.805685	0.04	0.307385	0.4142	0.000637554	0.543	2.1244	0.978962	0.25777
FB-MAC	PDGFRA-CCDC88C	19.0064	4.1026	0.000146463	0.0498142	6.1458	3.0926	0.003651	0.912738	0.028571	0.805685	0.22	0.701829	0.322884	0.00137826	0.2877	1.4683	0.978962	0.35249
FB-MAC	PRKACB-FBP1	15.4673	2.9623	0.000124814	0.0438494	5.4589	2.8334	0.003396	0.912738	0.026519	0.805685	0.02	0.195524	0.361704	0.000985701	0.2023	1.7103	0.978962	0.306216
FB-MAC	PRKACB-SCN4A	27.3979	5.0819	1.32e-05	0.00695818	5.0051	5.474	0.015299	0.912738	0.028571	0.805685	1	1	0.361704	0.000698893	0.2023	3.0279	0.978962	0.267737
FB-MAC	PRKCA-FBP1	19.7733	3.8222	0.000112935	0.0405935	5.1526	3.8375	0.003339	0.912738	0.026519	0.805685	0.18	0.649903	0.711997	0.000985701	0.1412	1.7103	0.981933	0.306216
FB-MAC	RPS6KA3-SCN4A	31.5979	5.7618	3.04e-06	0.00205654	4.9385	6.3982	0.015875	0.912738	0.028571	0.805685	0.78	1	0.248848	0.000698893	0.3728	3.0279	0.973243	0.267737
FB-MAC	JAK1-IL5RA	23.6739	3.7847	4.16e-07	0.000385618	6.6045	3.5845	0.000671	0.657902	0.026519	0.805685	1	1	0.313914	0.000252957	0.2098	2.2758	0.978962	0.170888
FB-MAC	LYN-IL5RA	21.6093	3.3998	4.8e-07	0.000433998	6.1286	3.526	0.000866	0.704985	0.026519	0.805685	1	1	0.945317	0.000252957	0.0221	2.2758	0.997081	0.170888
FB-MAC	TNK1-PLCG1	17.3109	3.5229	7.96e-05	0.0307063	4.6074	3.7572	0.003664	0.912738	0.026519	0.805685	1	1	0.00144954	0.156357	2.1747	0.43	0.359821	0.964474
FB-MAC	MYB-CEBPB	8.585	1.5159	5.82e-07	0.000507625	10.4012	0.8254	0.001146	0.75424	0.028571	0.805685	0.52	0.957827	0.000151875	0.118771	1.5787	-0.9413	0.140107	0.963808
FB-PC	SP1-GDF15	-38.0768	4.8394	1.08e-09	2.44e-06	-6.8224	5.5811	0.006418	0.912738	0.028571	0.805685	1	1	0.753498	4.04e-05	0.0878	-4.3891	0.983861	0.0776932
FB-PC	MYB-COL1A2	12.5068	1.9707	6.81e-08	8.31e-05	8.2707	1.5122	0.003422	0.912738	0.028571	0.805685	0.38	0.852867	0.000151875	0.564406	1.5787	0.5163	0.140107	0.979433
FB-PC	MYB-COL1A1	10.8053	2.1419	5.41e-05	0.0224227	7.7638	1.3918	0.004378	0.912738	0.028571	0.805685	1	1	0.000151875	0.746586	1.5787	0.4162	0.140107	0.98371
FB-PC	EPHB3-EFNB3	9.5701	1.8774	1.5e-05	0.0077635	4.5292	2.113	0.008215	0.912738	0.026519	0.805685	0.16	0.615014	0.142666	0.000662565	-0.3637	1.9147	0.963808	0.263929
FB-PC	MAPK14-SMAD3	11.3646	2.4173	4.3e-05	0.0186123	5.3861	2.11	0.008475	0.912738	0.028571	0.805685	1	1	0.0474511	0.00359599	0.4539	0.9344	0.963808	0.503347
FB-PC	OSTN-NPR3	-42.14	6.7892	2.83e-07	0.000279015	-4.2582	9.8962	0.023597	0.912738	0.028571	0.805685	0.34	0.822069	6.51e-05	0.549624	-5.4378	-0.6529	0.0978244	0.978962
FB-PC	LFNG-NOTCH1	-15.2156	3.0437	4.92e-05	0.0207756	-5.6111	2.7117	0.003069	0.912738	0.028571	0.805685	0.48	0.9325	0.00127534	0.265149	-1.9549	-0.301	0.342913	0.975606
FB-PC	SRC-TXK	10.4265	2.1446	0.000113798	0.0408279	4.6032	2.265	0.004629	0.912738	0.026519	0.805685	0.3	0.789097	0.0868651	0.00169812	0.4189	1.5232	0.963808	0.385563
FB-PC	PRKACA-KCNJ12	14.3958	2.5532	1.18e-06	0.000918189	5.4869	2.6237	0.001894	0.8415	0.026519	0.805685	0.18	0.649903	0.901987	0.000440082	0.0573	1.9647	0.994202	0.214795
FB-PC	LFNG-JAG1	-14.7676	3.0368	3.79e-05	0.01676	-6.1471	2.4024	0.000874	0.706437	0.028571	0.805685	0.08	0.450284	0.00127534	0.557163	-1.9549	-0.1312	0.342913	0.979433
FB-PC	ELAVL2-ADAM10	-19.8795	3.5036	5.88e-06	0.00355826	-5.3754	3.6982	0.00866	0.912738	0.028571	0.805685	0.48	0.9325	0.00063434	0.517809	-2.7036	-0.1348	0.257228	0.978962
FB-PC	ACVR2B-SMAD3	10.7617	2.1196	3.03e-05	0.0138879	5.559	1.9359	0.002371	0.882459	0.028571	0.805685	0.72	1	0.0164916	0.00359599	0.8434	0.9344	0.821089	0.503347
FB-PC	EPHA4-EFNB3	17.2808	3.1368	1.64e-05	0.00835974	5.3365	3.2382	0.005219	0.912738	0.026519	0.805685	1	1	0.665565	0.000662565	0.1149	1.9147	0.980642	0.263929
FB-PC	EFNB3-EPHB4	23.7061	5.0719	3.78e-05	0.0167293	3.978	5.9593	0.008348	0.912738	0.026519	0.805685	0.04	0.307385	0.00216064	0.894084	3.7169	0.056	0.418331	0.993462
FB-PC	EFNB3-EPHB1	20.6651	4.0569	6.17e-05	0.024954	4.1983	4.9222	0.005883	0.912738	0.026519	0.805685	0.38	0.852867	0.00216064	0.0305571	3.7169	1.2274	0.418331	0.937683
FB-PC	EPHB2-EFNB3	11.4326	2.3169	3.75e-05	0.0165953	5.476	2.0878	0.002823	0.912738	0.026519	0.805685	0.86	1	0.964699	0.000662565	0.0197	1.9147	0.998864	0.263929
FB-PC	FGF7-NRP1	17.4484	3.1221	2.07e-05	0.0101102	8.8449	1.9727	0.000149	0.4995	0.028571	0.805685	0.26	0.750887	0.000131129	0.123752	1.3948	0.5538	0.135025	0.963808
FB-PC	GDF15-TGFBR2	-48.7904	8.5202	3.65e-06	0.00240187	-5.3518	9.1166	0.01256	0.912738	0.028571	0.805685	1	1	0.000438574	0.871616	-6.8112	-0.0298	0.214551	0.991336
FB-PC	CDK5-PHACTR3	5.3581	1.1025	3.87e-05	0.0170256	7.023	0.7629	0.00155	0.806029	0.028571	0.805685	1	1	0.738807	0.00096663	-0.1094	0.9317	0.983072	0.302341
FB-PC	ERBB2-TXK	9.0005	1.8444	0.000100975	0.0371329	4.2046	2.1406	0.008104	0.912738	0.026519	0.805685	0.24	0.729859	0.294178	0.00169812	0.3782	1.5232	0.978962	0.385563
FB-PC	IGF1R-TXK	17.9705	3.8248	0.000106252	0.0386255	4.7159	3.8106	0.003961	0.912738	0.026519	0.805685	0.04	0.307385	0.322396	0.00169812	0.3245	1.5232	0.978962	0.385563
FB-PC	GRB2-IKZF3	19.6773	4.1166	7.64e-05	0.0297411	4.2894	4.5874	0.022977	0.912738	0.028571	0.805685	0.42	0.887979	0.570047	0.00140282	0.1328	2.1702	0.979433	0.354811
FB-PC	TNK1-PLCG1	13.128	2.6545	4.25e-05	0.0184474	4.6367	2.8313	0.003652	0.912738	0.026519	0.805685	0.8	1	0.00144954	0.511332	2.1747	0.1628	0.359821	0.978962
FB-PC	CASK-KCNJ12	21.8474	3.6559	1.61e-07	0.0001731	5.7347	3.8097	0.001929	0.845312	0.026519	0.805685	0.04	0.307385	0.34669	0.000440082	0.3201	1.9647	0.978962	0.214795
FB-LEC	HIPK2-SIAH2	-9.4013	1.6637	8.41e-06	0.00478232	-7.5975	1.2374	0.000495	0.643809	0.028571	0.805685	0.82	1	0.702155	0.000284008	0.1016	-1.1333	0.981235	0.177865
FB-LEC	EGR1-DUSP4	11.8381	1.8697	1.63e-07	0.000175278	8.2009	1.4435	0.000319	0.622241	0.026519	0.805685	0.38	0.852867	0.109706	0.00033029	0.8627	1.2822	0.963808	0.189973
FB-LEC	BAG4-TNFRSF1A	-7.2808	1.5372	5.18e-05	0.0216363	-6.1639	1.1812	0.000936	0.715785	0.028571	0.805685	0.74	1	0.128185	0.0023058	-0.2966	-0.9546	0.963808	0.427282
FB-LEC	NFE2L2-OSGIN1	10.594	1.5875	2.16e-09	4.43e-06	7.7669	1.364	0.00289	0.912738	0.028571	0.805685	1	1	0.912678	0.000211074	0.0309	1.1128	0.995042	0.157265
FB-LEC	BMPR2-BMP2	16.7013	2.3435	3.98e-09	7.47e-06	7.4094	2.2541	0.000311	0.621502	0.026519	0.805685	0.1	0.497333	0.812712	0.000143629	-0.0501	1.543	0.988036	0.139189
FB-LEC	MAPK1-DUSP4	12.5389	2.0309	3.56e-07	0.000339479	6.8562	1.8288	0.000575	0.643809	0.026519	0.805685	0.1	0.497333	0.688446	0.00033029	0.0841	1.2822	0.981022	0.189973
FB-LEC	MAPK3-DUSP4	8.3809	1.564	9.55e-06	0.00532112	6.0523	1.3847	0.001091	0.745346	0.026519	0.805685	0.92	1	0.797294	0.00033029	-0.2052	1.2822	0.986704	0.189973
FB-LEC	MAPK8-DUSP4	11.5132	1.8312	1.55e-07	0.000167333	6.87	1.6759	0.000557	0.643809	0.026519	0.805685	0.02	0.195524	0.680434	0.00033029	0.1222	1.2822	0.981006	0.189973
FB-LEC	FGFR2-FGF7	22.0978	3.6509	4.89e-07	0.000440133	5.6092	3.9395	0.007029	0.912738	0.028571	0.805685	1	1	0.748903	0.00034657	-0.1243	2.2749	0.98371	0.193669
FB-LEC	LMTK2-CDK5R1	6.4943	1.2811	3.06e-05	0.0139913	7.1702	0.9057	0.000372	0.629432	0.028571	0.805685	0.4	0.869191	0.344966	0.00123047	0.2208	0.7663	0.978962	0.339315
FB-LEC	NEO1-BMP2	13.6497	2.3077	1.79e-06	0.00130957	7.0313	1.9413	0.000419	0.641735	0.026519	0.805685	0.02	0.195524	0.305338	0.000143629	1.0877	1.543	0.978962	0.139189
FB-LEC	ACVR1-BMP2	14.7323	2.0678	1.36e-10	4.12e-07	7.381	1.996	0.000318	0.622241	0.026519	0.805685	0.18	0.649903	0.779831	0.000143629	0.059	1.543	0.985147	0.139189
FB-LEC	OSTN-NPR3	-31.0834	4.5458	1.82e-08	2.69e-05	-5.7774	5.3802	0.010211	0.912738	0.028571	0.805685	0.36	0.838242	6.51e-05	0.419219	-5.4378	-0.5769	0.0978244	0.978962
FB-LEC	MAPK14-SIAH2	-9.5003	1.2722	1.3e-09	2.86e-06	-7.782	1.2208	0.000673	0.657902	0.028571	0.805685	1	1	0.0474511	0.000284008	0.4539	-1.1333	0.963808	0.177865
FB-LEC	DYRK2-SIAH2	-7.9124	1.6221	4.04e-05	0.0176468	-5.2755	1.4998	0.005804	0.912738	0.028571	0.805685	0.08	0.450284	0.983938	0.000284008	0.0089	-1.1333	0.999242	0.177865
FB-LEC	AURKB-ZWINT	-12.4271	2.6509	0.000120943	0.0427721	-4.0063	3.1019	0.008035	0.912738	0.028571	0.805685	0.2	0.676998	0.00282281	0.313661	-2.4592	-0.3144	0.461643	0.978962
FB-LEC	RANBP9-DYRK1B	20.9168	3.1811	6.85e-09	1.18e-05	6.2474	3.3481	0.006974	0.912738	0.026519	0.805685	0.5	0.944488	0.129265	0.000315674	0.4295	2.0317	0.963808	0.187307
FB-LEC	SIK2-CDK5R1	7.4829	1.5169	6.64e-05	0.0265334	7.2003	1.0392	0.000387	0.633106	0.028571	0.805685	0.62	1	0.701074	0.00123047	0.1533	0.7663	0.981188	0.339315
FB-LEC	CHN1-CDK5R1	7.1836	1.4865	9.96e-05	0.0367284	7.006	1.0254	0.000423	0.642071	0.028571	0.805685	0.9	1	0.43266	0.00123047	0.2788	0.7663	0.978962	0.339315
FB-LEC	CAPN1-CDK5R1	5.1768	1.0036	1.83e-05	0.00915868	6.9617	0.7436	0.000513	0.643809	0.028571	0.805685	1	1	0.331456	0.00123047	0.2359	0.7663	0.978962	0.339315
FB-LEC	PRKACA-KCNJ3	27.2212	5.2055	3.32e-05	0.0149831	4.6849	5.8104	0.009416	0.912738	0.026519	0.805685	0.14	0.580719	0.901987	0.000663345	0.0573	3.7301	0.994202	0.263929
FB-LEC	AKT1-AGAP2	13.3561	2.0542	4.41e-09	8.14e-06	9.9478	1.3426	0.000246	0.599376	0.026519	0.805685	0.48	0.9325	0.72501	8.87e-06	0.4015	1.9434	0.981933	0.0478398
FB-LEC	MAP2K3-DYRK1B	14.1844	2.3749	1.88e-08	2.76e-05	5.8128	2.4402	0.006943	0.912738	0.026519	0.805685	1	1	0.536161	0.000315674	-0.2349	2.0317	0.978962	0.187307
FB-LEC	DCAF7-DYRK1B	15.9166	2.5485	1.61e-08	2.43e-05	5.9647	2.6685	0.008269	0.912738	0.026519	0.805685	0.76	1	0.918751	0.000315674	0.0192	2.0317	0.995191	0.187307
FB-LEC	CDK5-AGAP2	11.2046	1.1882	0	0	11.7693	0.952	0.000454	0.642622	0.026519	0.805685	0.82	1	0.738807	8.87e-06	-0.1094	1.9434	0.983072	0.0478398
FB-LEC	ELAVL2-ADAM10	-18.6999	3.3864	1.52e-06	0.00114153	-4.9217	3.7995	0.013939	0.912738	0.028571	0.805685	0.58	0.993964	0.00063434	0.858089	-2.7036	-0.0412	0.257228	0.989911
FB-LEC	MAPK9-DUSP4	11.317	1.8002	5.07e-07	0.000453599	7.0096	1.6145	0.000505	0.643809	0.026519	0.805685	0.62	1	0.293093	0.00033029	0.3229	1.2822	0.978962	0.189973
FB-LEC	MAPK14-DUSP4	12.2782	1.9223	1.38e-07	0.000151866	7.0166	1.7499	0.000515	0.643809	0.026519	0.805685	0.16	0.615014	0.0474511	0.00033029	0.4539	1.2822	0.963808	0.189973
FB-LEC	FGFR1-FGF7	24.6031	4.0987	4.41e-07	0.00040468	6.2249	3.9524	0.004834	0.912738	0.028571	0.805685	1	1	0.575299	0.00034657	0.1503	2.2749	0.979433	0.193669
FB-LEC	GDF15-TGFBR2	-51.0952	8.7986	1.69e-06	0.00124841	-5.4617	9.3552	0.011861	0.912738	0.028571	0.805685	1	1	0.000438574	0.710264	-6.8112	0.0994	0.214551	0.981933
FB-LEC	PPP2CA-CDK5R1	6.9427	1.3805	7.46e-05	0.0291463	7.3139	0.9492	0.000353	0.629432	0.028571	0.805685	1	1	0.920748	0.00123047	-0.0263	0.7663	0.995237	0.339315
FB-LEC	PPP2CB-CDK5R1	6.1674	1.2608	0.000126146	0.0442323	7.234	0.8526	0.000359	0.629432	0.028571	0.805685	0.74	1	0.782096	0.00123047	-0.0597	0.7663	0.985315	0.339315
FB-LEC	CSNK1D-AGAP2	16.3039	1.6393	0	0	11.7742	1.3847	0.000378	0.629432	0.026519	0.805685	0.12	0.539527	0.494388	8.87e-06	-0.1272	1.9434	0.978962	0.0478398
FB-LEC	CSNK1D-FHOD1	-10.5937	2.2405	2.51e-05	0.0118495	-4.7861	2.2134	0.006183	0.912738	0.028571	0.805685	0.36	0.838242	0.494388	0.00170478	-0.1272	-1.2096	0.978962	0.385563
FB-LEC	GSK3B-RNPS1	-9.8449	2.1986	0.000140312	0.0481708	-4.9752	1.9788	0.002519	0.896602	0.028571	0.805685	0.64	1	0.922235	0.0014632	-0.0215	-0.9047	0.995237	0.36079
FB-LEC	MAPK14-AGAP2	18.583	1.8948	0	0	12.7425	1.4583	0.000291	0.615161	0.026519	0.805685	0.84	1	0.0474511	8.87e-06	0.4539	1.9434	0.963808	0.0478398
FB-LEC	PRKCA-AGAP2	22.5724	2.1268	0	0	12.0794	1.8687	0.000167	0.516737	0.026519	0.805685	0.34	0.822069	0.711997	8.87e-06	0.1412	1.9434	0.981933	0.0478398
FB-LEC	PRKCD-CDK5R1	5.675	1.1764	2.43e-05	0.0115231	6.5572	0.8655	0.000714	0.67048	0.028571	0.805685	0.52	0.957827	0.583623	0.00123047	-0.1335	0.7663	0.979433	0.339315
FB-LEC	MAPK1-IRS2	23.0286	5.2744	0.000146315	0.049781	3.978	5.789	0.02223	0.912738	0.026519	0.805685	0.18	0.649903	0.688446	0.00328413	0.0841	2.3464	0.981022	0.486483
FB-LEC	MAPK14-DYRK1B	19.5024	3.181	2.56e-06	0.00177208	6.2962	3.0975	0.00733	0.912738	0.026519	0.805685	1	1	0.0474511	0.000315674	0.4539	2.0317	0.963808	0.187307
FB-LEC	MAPK1-DYRK1B	19.8949	3.1108	1.51e-08	2.29e-05	6.1407	3.2398	0.00762	0.912738	0.026519	0.805685	0.12	0.539527	0.688446	0.000315674	0.0841	2.0317	0.981022	0.187307
FB-LEC	CDK16-CDK5R1	5.7567	1.143	6.5e-05	0.0260596	7.4663	0.771	0.000314	0.622241	0.028571	0.805685	0.38	0.852867	0.732344	0.00123047	-0.1038	0.7663	0.982535	0.339315
FB-LEC	MGP-BMP2	17.5261	2.992	4.44e-05	0.0191048	6.5716	2.667	0.000606	0.645877	0.026519	0.805685	0.96	1	0.543527	0.000143629	-0.6097	1.543	0.978962	0.139189
FB-LEC	TGFB1-BMP2	11.5887	1.7702	7.1e-07	0.000598093	6.4492	1.7969	0.00071	0.66906	0.026519	0.805685	0.26	0.750887	0.509801	0.000143629	-0.3247	1.543	0.978962	0.139189
FB-LEC	PAK1-CDK5R1	4.4966	0.9687	7.34e-05	0.0287823	5.9649	0.7538	0.001119	0.750222	0.028571	0.805685	0.76	1	0.0575993	0.00123047	-0.5277	0.7663	0.963808	0.339315
FB-LEC	CSNK2A1-CUX2	19.1038	4.0348	6.62e-05	0.026444	4.3915	4.3501	0.006377	0.912738	0.026519	0.805685	0.38	0.852867	0.767788	0.00185991	0.0591	2.0133	0.984537	0.398696
FB-LEC	CHRD-BMP2	10.0935	1.4382	3.69e-09	7.01e-06	8.4673	1.1921	0.000317	0.622241	0.026519	0.805685	0.06	0.384333	0.184991	0.000143629	0.4507	1.543	0.965251	0.139189
FB-LEC	HIPK3-SIAH2	-10.752	1.7662	7.8e-07	0.00064527	-7.6514	1.4052	0.000837	0.698689	0.028571	0.805685	1	1	0.944323	0.000284008	0.0139	-1.1333	0.99705	0.177865
FB-SM	SUMO2-RARA	11.1278	2.1654	4.95e-05	0.0208827	5.4245	2.0514	0.007438	0.912738	0.057143	0.941553	0.98	1	0.122919	0.00147128	-0.4739	1.3116	0.963808	0.361485
FB-SM	ESR1-RARA	11.2945	2.0221	3.94e-05	0.0172914	4.8586	2.3246	0.008882	0.912738	0.057143	0.941553	1	1	0.701366	0.00147128	0.1293	1.3116	0.981188	0.361485
FB-SM	RXRA-RARA	9.6229	1.8819	3.86e-06	0.00251285	5.5262	1.7413	0.005655	0.912738	0.057143	0.941553	1	1	0.723829	0.00147128	0.1309	1.3116	0.981933	0.361485
FB-SM	THRA-RARA	12.6144	2.3021	9.21e-06	0.00515782	4.9447	2.5511	0.007777	0.912738	0.057143	0.941553	0.26	0.750887	0.881732	0.00147128	0.0333	1.3116	0.99248	0.361485
FB-SM	NCOA2-RARA	14.8269	2.7017	3.24e-06	0.00217089	5.2262	2.837	0.006293	0.912738	0.057143	0.941553	0.7	1	0.12511	0.00147128	0.5473	1.3116	0.963808	0.361485
FB-SM	NRIP1-RARA	13.3179	2.5678	5.75e-05	0.0235511	5.1138	2.6043	0.011188	0.912738	0.057143	0.941553	0.16	0.615014	0.74802	0.00147128	-0.1321	1.3116	0.98371	0.361485
FB-SM	ASXL1-RARA	12.9024	2.3841	2.57e-06	0.00178111	5.2506	2.4573	0.005259	0.912738	0.057143	0.941553	1	1	0.1185	0.00147128	0.3337	1.3116	0.963808	0.361485
FB-SM	KMT2E-RARA	14.9807	2.7771	2.4e-06	0.00167934	5.125	2.9231	0.007655	0.912738	0.057143	0.941553	0.98	1	0.642607	0.00147128	0.139	1.3116	0.980026	0.361485
FB-SM	MAPK12-SH3BP5	13.0455	2.6834	8.35e-05	0.0318992	4.6279	2.8189	0.010946	0.912738	0.029401	0.805685	0.18	0.649903	0.28465	0.00186417	0.3916	1.7503	0.978556	0.398847
FB-SM	CDK5-AMPH	14.279	2.0955	3.4e-09	6.52e-06	6.1187	2.3337	0.001362	0.783431	0.029401	0.805685	0.26	0.750887	0.738807	0.000155843	-0.1094	2.464	0.983072	0.140107
FB-SM	CDKL5-AMPH	17.7631	2.6599	2.7e-08	3.77e-05	6.8962	2.5758	0.001405	0.788618	0.029401	0.805685	1	1	0.0937653	0.000155843	0.3638	2.464	0.963808	0.140107
FB-SM	MAPK3-AMPH	15.9154	2.9104	1.31e-05	0.00694059	6.4044	2.4851	0.003786	0.912738	0.029401	0.805685	0.16	0.615014	0.797294	0.000155843	-0.2052	2.464	0.986704	0.140107
FB-SM	MAPK1-AMPH	24.0278	3.3585	2.53e-09	5.09e-06	6.7876	3.5399	0.002094	0.859533	0.029401	0.805685	0.08	0.450284	0.688446	0.000155843	0.0841	2.464	0.981022	0.140107
FB-SM	MAPK9-SH3BP5	15.569	3.1885	4.69e-05	0.0199895	4.7207	3.298	0.01213	0.912738	0.029401	0.805685	1	1	0.293093	0.00186417	0.3229	1.7503	0.978962	0.398847
FB-SM	CDK7-RARA	11.1158	2.2019	4.14e-05	0.0180339	4.9933	2.2262	0.00786	0.912738	0.057143	0.941553	0.08	0.450284	0.688334	0.00147128	0.101	1.3116	0.981022	0.361485
FB-SM	CSNK2A1-AMPH	23.4256	3.2699	1.34e-08	2.07e-05	6.8034	3.4432	0.002031	0.856413	0.029401	0.805685	0.46	0.917918	0.767788	0.000155843	0.0591	2.464	0.984537	0.140107
FB-SM	DYRK1A-AMPH	25.2336	3.5228	6.35e-10	1.54e-06	6.8279	3.6956	0.001819	0.834041	0.029401	0.805685	0.4	0.869191	0.187082	0.000155843	0.3737	2.464	0.965251	0.140107
FB-SM	TNFSF13B-TFRC	9.9004	1.9941	2.34e-05	0.0111944	5.1825	1.9104	0.003268	0.912738	0.026519	0.805685	0.64	1	0.0187111	0.00287099	0.7668	1.5585	0.846363	0.46431
FB-SM	LAMC1-SV2A	13.0884	2.9678	9.25e-05	0.0346679	4.4015	2.9736	0.006485	0.912738	0.029401	0.805685	1	1	0.0500533	0.00364175	0.4732	0.9844	0.963808	0.50582
FB-SM	CD59B-SIGLEC1	4.5793	0.8703	1.67e-05	0.00846784	4.3232	1.0592	0.01297	0.912738	0.026519	0.805685	0.06	0.384333	0.0412249	0.000937024	1.343	1.1323	0.963808	0.29748
FB-SM	CD47-SIGLEC1	11.7861	2.1743	5.98e-06	0.00360613	5.3165	2.2169	0.001859	0.838605	0.026519	0.805685	0.74	1	0.597742	0.000937024	0.1579	1.1323	0.979433	0.29748
FB-SM	MAPK8-RARA	11.6996	2.1995	2.66e-05	0.0124376	5.1756	2.2605	0.007053	0.912738	0.057143	0.941553	1	1	0.680434	0.00147128	0.1222	1.3116	0.981006	0.361485
FB-SM	PRKACA-RARA	9.8664	1.8313	3.83e-05	0.0168912	6.2371	1.5819	0.003709	0.912738	0.057143	0.941553	0.6	1	0.901987	0.00147128	0.0573	1.3116	0.994202	0.361485
FB-SM	RPS6KA5-RARA	12.6498	2.3	2.38e-05	0.0113488	5.2501	2.4094	0.005495	0.912738	0.057143	0.941553	1	1	0.223751	0.00147128	0.4901	1.3116	0.97053	0.361485
FB-SM	PRKG1-RAP1GAP2	31.3028	6.3426	0.000126017	0.0441925	4.7797	6.549	0.011992	0.912738	0.029401	0.805685	0.1	0.497333	0.48989	0.00139289	0.2818	2.4513	0.978962	0.353927
FB-SM	MAPK9-DUSP19	10.8087	2.0846	5.71e-05	0.0234177	6.3184	1.7107	0.006834	0.912738	0.057143	0.941553	1	1	0.293093	0.00161214	0.3229	1.2329	0.978962	0.37982
FB-SM	CDK2-AMPH	13.4831	1.9594	3.3e-09	6.37e-06	6.3386	2.1272	0.001426	0.792617	0.029401	0.805685	0.36	0.838242	0.446996	0.000155843	-0.1808	2.464	0.978962	0.140107
FB-SM	GSK3B-AMPH	26.42	3.6668	3.15e-09	6.12e-06	6.6701	3.961	0.002198	0.869356	0.029401	0.805685	1	1	0.922235	0.000155843	-0.0215	2.464	0.995237	0.140107
FB-SM	GSK3B-RARA	14.0294	2.6896	3.5e-05	0.0156469	5.1501	2.7241	0.007702	0.912738	0.057143	0.941553	1	1	0.922235	0.00147128	-0.0215	1.3116	0.995237	0.361485
FB-SM	MAPK1-RARA	12.7608	2.3339	4.55e-06	0.00287039	5.1725	2.467	0.007106	0.912738	0.057143	0.941553	1	1	0.688446	0.00147128	0.0841	1.3116	0.981022	0.361485
FB-SM	MAPK14-RARA	12.6181	2.273	1.72e-06	0.00126316	5.4331	2.3224	0.00517	0.912738	0.057143	0.941553	1	1	0.0474511	0.00147128	0.4539	1.3116	0.963808	0.361485
FB-SM	MAPK9-AMPH	21.7647	3.0411	3.6e-11	1.29e-07	7.0259	3.0978	0.001841	0.836433	0.029401	0.805685	0.52	0.957827	0.293093	0.000155843	0.3229	2.464	0.978962	0.140107
FB-SM	CAMK2G-RARA	11.3443	2.0511	2.95e-06	0.00200269	5.495	2.0645	0.00485	0.912738	0.057143	0.941553	1	1	0.282428	0.00147128	0.2576	1.3116	0.978556	0.361485
FB-SM	MAP2K7-DUSP19	8.7097	1.6203	1.84e-05	0.00919304	6.2605	1.3912	0.007552	0.912738	0.057143	0.941553	1	1	0.171996	0.00161214	0.4188	1.2329	0.96521	0.37982
FB-SM	CCNH-RARA	10.9892	2.0696	7.68e-05	0.0298388	4.8348	2.2729	0.009406	0.912738	0.057143	0.941553	1	1	0.596525	0.00147128	-0.1281	1.3116	0.979433	0.361485
FB-SM	PRKCA-RARA	15.0367	2.9167	3.21e-05	0.0145732	4.9497	3.0379	0.008946	0.912738	0.057143	0.941553	0.92	1	0.711997	0.00147128	0.1412	1.3116	0.981933	0.361485
FB-SM	MAP3K5-DUSP19	12.4674	2.3128	1.11e-05	0.00601081	6.0974	2.0447	0.007867	0.912738	0.057143	0.941553	0.6	1	0.0791812	0.00161214	0.4667	1.2329	0.963808	0.37982
FB-SM	TRIM24-RARA	12.5975	2.395	2.87e-05	0.0132614	5.4661	2.3047	0.004989	0.912738	0.057143	0.941553	1	1	0.482022	0.00147128	0.2763	1.3116	0.978962	0.361485
FB-ADIPO	BIRC2-CASP7	26.652	5.2393	2.71e-05	0.0126456	4.87	5.4727	0.016105	0.912738	0.029401	0.805685	1	1	0.614756	0.00092649	-0.1473	3.1867	0.979433	0.297225
FB-ADIPO	BIRC3-CASP7	27.6042	5.1793	5.05e-05	0.0212176	4.9937	5.5278	0.013886	0.912738	0.029401	0.805685	1	1	0.591054	0.00092649	0.2226	3.1867	0.979433	0.297225
FB-ADIPO	CASP3-CASP7	19.1712	3.5832	1.36e-05	0.00717236	4.8236	3.9744	0.009492	0.912738	0.029401	0.805685	0.16	0.615014	0.656602	0.00092649	0.1678	3.1867	0.980425	0.297225
FB-ADIPO	BIRC6-CASP7	35.446	6.7495	2.3e-05	0.0110148	5.0279	7.0499	0.014294	0.912738	0.029401	0.805685	0.92	1	0.668274	0.00092649	0.1353	3.1867	0.980642	0.297225
FB-ADIPO	CASP9-CASP7	21.1585	4.1426	2.64e-05	0.0123686	5.1454	4.1121	0.012593	0.912738	0.029401	0.805685	0.56	0.979773	0.635391	0.00092649	-0.1144	3.1867	0.979796	0.297225
FB-ADIPO	STAT1-IRF8	25.9909	5.6342	9.55e-05	0.0355212	4.3514	5.973	0.00616	0.912738	0.026519	0.805685	0.4	0.869191	0.611706	0.00186056	-0.1312	3.0707	0.979433	0.398696
FB-ADIPO	GSK3B-GLI3	41.7857	8.5786	6.18e-05	0.0250193	4.6586	8.9696	0.014067	0.912738	0.029401	0.805685	0.48	0.9325	0.922235	0.00130585	-0.0215	3.9078	0.995237	0.344881
FB-ADIPO	ABL1-PDGFRB	41.1596	5.6593	1.71e-10	5e-07	6.6749	6.1663	0.000574	0.643809	0.026519	0.805685	0.98	1	0.118404	0.000150326	0.3916	4.3154	0.963808	0.140107
FB-ADIPO	ABL1-PIK3AP1	41.3979	5.1777	1e-12	5.04e-09	7.5394	5.4909	0.0013	0.774959	0.029401	0.805685	1	1	0.118404	9.51e-05	0.3916	4.3393	0.963808	0.118182
FB-ADIPO	PRKCE-ADCY7	39.6816	7.7993	9.93e-05	0.0366598	4.5108	8.7971	0.012534	0.912738	0.029401	0.805685	0.78	1	0.227594	0.00155619	0.3782	3.6308	0.970544	0.374182
FB-ADIPO	PRKCD-ADCY7	26.8995	5.6298	4.51e-05	0.0193581	4.495	5.9843	0.010144	0.912738	0.029401	0.805685	0.38	0.852867	0.583623	0.00155619	-0.1335	3.6308	0.979433	0.374182
FB-ADIPO	SP3-HAS2	21.6496	4.1586	2.81e-05	0.0130026	7.5779	2.857	0.004747	0.912738	0.133333	1	0.9	1	0.163693	0.00355974	0.2903	2.1006	0.96517	0.502357
FB-ADIPO	SP1-HAS2	18.2791	3.6446	1.42e-05	0.00740618	7.8914	2.3163	0.004223	0.912738	0.133333	1	0.92	1	0.753498	0.00355974	0.0878	2.1006	0.983861	0.502357
FB-ADIPO	SP1-ABCC3	20.1585	3.9673	3.8e-05	0.0167966	4.9415	4.0794	0.004153	0.912738	0.026519	0.805685	1	1	0.753498	0.00124243	0.0878	2.3112	0.983861	0.340563
FB-ADIPO	ABL1-APBB1	14.6737	2.7971	1.6e-05	0.00815875	5.386	2.7244	0.001717	0.825402	0.026519	0.805685	0.8	1	0.118404	0.00119839	0.3916	1.5354	0.963808	0.334493
FB-ADIPO	ABL2-HCK	36.6027	6.0272	9.78e-08	0.000113295	5.7848	6.3274	0.00224	0.872644	0.026519	0.805685	0.5	0.944488	0.303727	0.000523648	0.2726	3.7939	0.978962	0.232206
FB-ADIPO	ABL1-HCK	36.0931	5.8575	3.96e-06	0.00256194	5.8128	6.2093	0.002095	0.859533	0.026519	0.805685	0.72	1	0.118404	0.000523648	0.3916	3.7939	0.963808	0.232206
FB-ADIPO	EGR1-TGFB1	29.4453	3.8692	4.4e-11	1.55e-07	7.2849	4.042	0.001759	0.830687	0.029401	0.805685	0.56	0.979773	0.109706	0.000118103	0.8627	3.2034	0.963808	0.131471
FB-ADIPO	XIAP-CASP7	31.6089	5.6449	2.15e-05	0.0104524	4.9783	6.3493	0.014364	0.912738	0.029401	0.805685	0.48	0.9325	0.9736	0.00092649	0.0074	3.1867	0.999242	0.297225
FB-ADIPO	SUFU-GLI3	31.8737	6.1309	7.18e-05	0.0282607	4.8523	6.5687	0.010868	0.912738	0.029401	0.805685	1	1	0.320466	0.00130585	0.2927	3.9078	0.978962	0.344881
FB-ADIPO	TGFBR2-TGFB1	32.3686	4.2914	3.84e-10	1.01e-06	7.4623	4.3376	0.001731	0.825628	0.029401	0.805685	0.7	1	0.843443	0.000118103	-0.0497	3.2034	0.989911	0.131471
FB-ADIPO	TGFBR3-TGFB1	37.9387	4.9547	0	0	7.4865	5.0676	0.002507	0.895843	0.029401	0.805685	0.22	0.701829	0.667384	0.000118103	0.1386	3.2034	0.980642	0.131471
FB-ADIPO	TGFBR1-TGFB1	32.1014	4.2207	3.9e-11	1.39e-07	7.1664	4.4794	0.001865	0.838655	0.029401	0.805685	0.22	0.701829	0.743885	0.000118103	0.1032	3.2034	0.983693	0.131471
FB-ADIPO	BTRC-GLI3	40.4839	7.6175	6.49e-05	0.0260446	4.6924	8.6275	0.012097	0.912738	0.029401	0.805685	1	1	0.370519	0.00130585	0.2969	3.9078	0.978962	0.344881
FB-ADIPO	PDGFRA-PDGFRB	50.8846	6.9683	9e-12	3.77e-08	7.3687	6.9055	0.000358	0.629432	0.026519	0.805685	1	1	0.322884	0.000150326	0.2877	4.3154	0.978962	0.140107
FB-ADIPO	RXRA-RARG	22.123	3.8187	1.19e-06	0.000927802	6.6508	3.3264	0.00539	0.912738	0.029401	0.805685	1	1	0.723829	0.000507761	0.1309	2.9885	0.981933	0.227732
FB-ADIPO	JAK1-CSF3R	28.8067	5.2035	4.02e-06	0.00259459	5.2499	5.4871	0.010088	0.912738	0.026519	0.805685	0.26	0.750887	0.313914	0.000847624	0.2098	2.7768	0.978962	0.286994
FB-ADIPO	MAPK8IP1-MAP4K1	9.4184	1.7251	5.65e-07	0.000494806	5.8131	1.6202	0.001312	0.776213	0.026519	0.805685	0.2	0.676998	0.590726	0.00084603	-0.1046	1.6902	0.979433	0.286994
FB-ADIPO	JAK2-CSF3R	25.4453	4.5896	1.84e-06	0.00134162	5.3858	4.7245	0.008993	0.912738	0.026519	0.805685	0.54	0.967114	0.592658	0.000847624	0.1423	2.7768	0.979433	0.286994
FB-ADIPO	PRKACA-GLI3	29.1661	5.7449	4.64e-05	0.0198395	5.2763	5.5277	0.009994	0.912738	0.029401	0.805685	1	1	0.901987	0.00130585	0.0573	3.9078	0.994202	0.344881
FB-ADIPO	CSF1-CSF3R	25.1512	4.5446	2e-06	0.0014388	5.0041	5.0262	0.012135	0.912738	0.026519	0.805685	0.66	1	0.606288	0.000847624	0.1507	2.7768	0.979433	0.286994
FB-ADIPO	TGFB1-ITGB8	19.9467	2.7927	6e-11	2.03e-07	9.1427	2.1817	0.000412	0.638611	0.026519	0.805685	1	1	0.509801	8.9e-05	-0.3247	2.6891	0.978962	0.115523
FB-ADIPO	ITGB8-TGFB1	30.071	3.9027	1.13e-10	3.52e-07	7.3992	4.0641	0.001682	0.821033	0.029401	0.805685	1	1	0.317432	0.000118103	0.3554	3.2034	0.978962	0.131471
FB-ADIPO	PTPN11-PDGFRB	36.2979	5.1845	1.66e-10	4.88e-07	7.8928	4.5989	0.000224	0.582291	0.026519	0.805685	0.66	1	0.448446	0.000150326	0.2758	4.3154	0.978962	0.140107
FB-ADIPO	NCK1-PDGFRB	41.8447	5.7717	4e-12	1.82e-08	6.838	6.1194	0.000488	0.643809	0.026519	0.805685	0.48	0.9325	0.428608	0.000150326	0.1695	4.3154	0.978962	0.140107
FB-ADIPO	CAV1-PDGFRB	38.2	6.4215	8.12e-07	0.000667525	6.1355	6.2261	0.000874	0.706437	0.026519	0.805685	0.12	0.539527	0.704797	0.000150326	0.4793	4.3154	0.981638	0.140107
FB-ADIPO	PDGFD-PDGFRB	43.9887	6.1226	9.4e-11	3e-07	5.753	7.6462	0.001214	0.764432	0.026519	0.805685	0.42	0.887979	0.508374	0.000150326	0.4413	4.3154	0.978962	0.140107
FB-ADIPO	NCK2-PDGFRB	35.8201	5.3157	6.52e-08	8e-05	6.3225	5.6655	0.000733	0.674854	0.026519	0.805685	0.28	0.769683	0.714362	0.000150326	0.1226	4.3154	0.981933	0.140107
FB-ADIPO	THRA-RARG	28.9537	4.8494	6.66e-07	0.000567743	5.7138	5.0673	0.007172	0.912738	0.029401	0.805685	1	1	0.881732	0.000507761	0.0333	2.9885	0.99248	0.227732
FB-ADIPO	PRKACB-PREX1	33.402	6.572	3.85e-05	0.0169529	4.6384	7.2012	0.016952	0.912738	0.029401	0.805685	1	1	0.361704	0.00161653	0.2023	3.6734	0.978962	0.37982
FB-ADIPO	PRKX-PREX1	26.2132	5.3736	0.000136444	0.047101	4.6797	5.6014	0.017795	0.912738	0.029401	0.805685	1	1	0.756287	0.00161653	-0.0948	3.6734	0.983895	0.37982
FB-ADIPO	PTK2-FGR	24.3233	3.8978	2.43e-08	3.44e-05	6.1928	3.9277	0.001624	0.814054	0.026519	0.805685	0.94	1	0.443198	0.000348159	0.2205	2.2208	0.978962	0.193996
FB-ADIPO	PTK2B-HCK	21.126	4.0246	7.38e-06	0.00429021	5.1361	4.1132	0.002532	0.897221	0.026519	0.805685	0.02	0.195524	0.32013	0.000523648	-0.4983	3.7939	0.978962	0.232206
FB-ADIPO	SH3BP2-VAV1	19.9909	4.5115	0.000132225	0.0459774	4.33	4.6169	0.018777	0.912738	0.029401	0.805685	1	1	0.287352	0.0029911	0.3201	2.8613	0.978962	0.468933
FB-ADIPO	GNAI1-FGR	16.4823	2.6912	6.07e-07	0.000525664	6.1132	2.6962	0.0015	0.800881	0.026519	0.805685	0.18	0.649903	0.317557	0.000348159	0.5533	2.2208	0.978962	0.193996
FB-ADIPO	GNAI1-HCK	28.5639	4.9277	1.73e-06	0.00126938	5.7229	4.9912	0.001724	0.825628	0.026519	0.805685	0.32	0.807536	0.317557	0.000523648	0.5533	3.7939	0.978962	0.232206
FB-ADIPO	GNAI3-FGR	20.2985	3.16	2.27e-07	0.000231225	6.382	3.1806	0.001352	0.782047	0.026519	0.805685	0.52	0.957827	0.566535	0.000348159	0.113	2.2208	0.979433	0.193996
FB-ADIPO	GNAI3-HCK	34.77	5.8312	5.76e-08	7.2e-05	5.5882	6.222	0.00238	0.883116	0.026519	0.805685	0.04	0.307385	0.566535	0.000523648	0.113	3.7939	0.979433	0.232206
FB-ADIPO	ARF1-PLD2	28.5567	5.1389	1.81e-06	0.00131965	5.4748	5.216	0.005067	0.912738	0.026519	0.805685	0.72	1	0.773307	0.000382609	0.261	3.2806	0.984537	0.201516
FB-ADIPO	TNFSF13B-TNFRSF13B	9.2661	1.7654	2.47e-05	0.0116909	5.0873	1.8214	0.007345	0.912738	0.026519	0.805685	0.08	0.450284	0.0187111	0.00164532	0.7668	1.4979	0.846363	0.381833
FB-ADIPO	RAF1-MAP4K1	15.6423	2.8825	1.83e-06	0.00133543	5.6569	2.7652	0.001335	0.778362	0.026519	0.805685	0.68	1	0.488373	0.00084603	0.1382	1.6902	0.978962	0.286994
FB-ADIPO	BRAF-MAP4K1	17.4845	3.1534	1.29e-05	0.00686357	5.4549	3.2053	0.001639	0.814054	0.026519	0.805685	0.56	0.979773	0.634933	0.00084603	0.1444	1.6902	0.979796	0.286994
FB-ADIPO	LAMTOR3-MAP4K1	11.3901	2.1365	1.94e-05	0.00958535	6.1172	1.862	0.000995	0.726231	0.026519	0.805685	1	1	0.299835	0.00084603	-0.4138	1.6902	0.978962	0.286994
FB-ADIPO	PRKCA-DNM1	32.0597	4.8872	2.06e-06	0.00147695	6.4925	4.9379	0.001299	0.774959	0.026519	0.805685	0.8	1	0.711997	0.00029676	0.1412	2.7824	0.981933	0.181309
FB-ADIPO	ARHGAP1-CIT	12.1465	2.4862	5.42e-05	0.022464	4.832	2.5138	0.002914	0.912738	0.029401	0.805685	1	1	0.484887	0.00147126	-0.2559	1.7506	0.978962	0.361485
FB-ADIPO	GRB2-DNM1	25.1102	3.6588	3.38e-08	4.56e-05	6.1265	4.0986	0.001036	0.732773	0.026519	0.805685	0.62	1	0.570047	0.00029676	0.1328	2.7824	0.979433	0.181309
FB-ADIPO	SRC-DNM1	19.1274	2.8544	7.68e-10	1.81e-06	7.1764	2.6653	0.000579	0.643809	0.026519	0.805685	0.42	0.887979	0.0868651	0.00029676	0.4189	2.7824	0.963808	0.181309
FB-ADIPO	TUBA1A-DNM1	24.0968	4.3376	5.02e-05	0.0211156	6.7887	3.5495	0.000728	0.67445	0.026519	0.805685	0.7	1	0.983591	0.00029676	-0.019	2.7824	0.999242	0.181309
FB-ADIPO	AP1B1-DNM1	19.6781	3.1674	1.69e-06	0.00124819	5.3068	3.7081	0.001964	0.848909	0.026519	0.805685	0.24	0.729859	0.995708	0.00029676	0.0023	2.7824	0.999509	0.181309
FB-ADIPO	NFE2L2-ABCC3	22.1118	4.2687	3.64e-05	0.0161886	4.9035	4.5094	0.003633	0.912738	0.026519	0.805685	0.18	0.649903	0.912678	0.00124243	0.0309	2.3112	0.995042	0.340563
FB-ADIPO	COP1-NLRC4	31.9329	4.1523	0	0	7.7209	4.1359	0.000378	0.629432	0.029401	0.805685	1	1	0.643393	9.36e-05	0.1157	3.0824	0.980026	0.118182
FB-ADIPO	CASP1-NLRC4	14.4146	3.2062	7.62e-05	0.0296849	5.3733	2.6826	0.005365	0.912738	0.029401	0.805685	1	1	0.217389	9.36e-05	1.3846	3.0824	0.969939	0.118182
FB-ADIPO	COP1-NLRP1B	34.5799	5.606	3.76e-08	4.99e-05	5.9409	5.8206	0.004659	0.912738	0.029401	0.805685	0.18	0.649903	0.643393	0.000395196	0.1157	3.3373	0.980026	0.205391
FB-ADIPO	MAGI2-CTNND2	39.5549	3.6634	0	0	12.2897	3.2185	0.000129	0.480884	0.029401	0.805685	1	1	0.0623797	1.01e-05	0.5877	3.1321	0.963808	0.0513697
FB-ADIPO	ERBIN-CTNND2	32.4204	3.1703	0	0	11.6496	2.783	0.000124	0.472398	0.029401	0.805685	0.48	0.9325	0.509437	1.01e-05	0.1758	3.1321	0.978962	0.0513697
FB-ADIPO	MAPK14-PTPN7	16.0648	2.6437	4e-08	5.26e-05	6.4965	2.4729	0.002758	0.912738	0.026519	0.805685	0.56	0.979773	0.0474511	0.000603918	0.4539	1.6758	0.963808	0.248557
FB-ADIPO	KIF7-GLI3	20.311	3.981	6.13e-05	0.0248269	4.9872	4.0726	0.005934	0.912738	0.029401	0.805685	0.28	0.769683	0.924167	0.00130585	-0.0295	3.9078	0.995301	0.344881
FB-ADIPO	HOOK3-MSR1	40.1651	5.1047	6.6e-11	2.21e-07	7.7045	5.2132	0.003771	0.912738	0.029401	0.805685	0.4	0.869191	0.693885	7.95e-05	0.0848	3.845	0.981022	0.109811
FB-ADIPO	MINK1-KCNH2	13.0487	2.556	4.06e-05	0.0177518	8.4942	1.5362	0.001277	0.772679	0.133333	1	1	1	0.994847	0.00233063	0.0017	1.7317	0.999509	0.427783
FB-ADIPO	AUTS2-PREX1	46.9881	9.6095	5.46e-05	0.0225847	4.7405	9.9121	0.016756	0.912738	0.029401	0.805685	1	1	0.456136	0.00161653	0.3047	3.6734	0.978962	0.37982
FB-ADIPO	LPAR1-GNA15	33.9857	3.628	0	0	16.7978	2.0232	7.8e-05	0.399127	0.133333	1	1	1	0.621924	0.000150282	0.1789	3.0585	0.979535	0.140107
FB-ADIPO	HDAC2-CIITA	25.4046	4.9619	3.55e-06	0.00234222	4.8235	5.2669	0.011002	0.912738	0.029401	0.805685	0.66	1	0.412874	0.00126715	-0.1669	3.2552	0.978962	0.342557
FB-ADIPO	KAT6A-RUNX1	49.8443	11.2491	0.000130787	0.0455879	4.0577	12.284	0.025855	0.912738	0.029401	0.805685	1	1	0.567474	0.0032728	0.1232	5.0033	0.979433	0.485852
FB-ADIPO	S1PR3-GNA14	18.1216	2.7579	8.4e-11	2.71e-07	6.675	2.7149	0.000567	0.643809	0.026519	0.805685	1	1	0.630408	0.000279836	0.1436	2.3419	0.979796	0.17718
FB-ADIPO	SMO-ARRB2	31.2277	3.8071	0	0	13.6246	2.292	0.000767	0.681401	0.133333	1	0.74	1	0.713137	0.000354138	0.1014	3.6029	0.981933	0.195427
FB-ADIPO	SHOC2-MRAS	25.6469	4.167	4.56e-07	0.000415177	5.9224	4.3305	0.002979	0.912738	0.029401	0.805685	1	1	0.791611	0.000415993	-0.0603	2.7399	0.985881	0.210239
FB-ADIPO	TLN1-ITGB8	23.9719	3.1742	1e-12	5.04e-09	8.3886	2.8577	0.001043	0.735042	0.026519	0.805685	1	1	0.845583	8.9e-05	-0.0824	2.6891	0.989911	0.115523
FB-ADIPO	SNX9-DNM1	27.1382	4.0715	1.07e-08	1.72e-05	6.4094	4.2341	0.000932	0.715785	0.026519	0.805685	0.72	1	0.380448	0.00029676	0.2205	2.7824	0.978962	0.181309
FB-ADIPO	DOK1-ITGB8	11.0253	2.0911	2.39e-05	0.0113907	11.3047	0.9753	3.8e-05	0.333041	0.026519	0.805685	0.36	0.838242	0.0842308	8.9e-05	-1.0703	2.6891	0.963808	0.115523
FB-ADIPO	CSNK1A1-FOXO6	17.5785	3.575	0.00014511	0.0494767	5.0116	3.5075	0.002432	0.888997	0.026519	0.805685	0.68	1	0.792703	0.0014551	-0.057	1.6156	0.986188	0.360083
FB-ADIPO	MAPK3-PTPN7	10.918	2.2572	8.11e-05	0.0311598	5.4991	1.9854	0.004419	0.912738	0.026519	0.805685	0.68	1	0.797294	0.000603918	-0.2052	1.6758	0.986704	0.248557
FB-ADIPO	PTPN1-PDGFRB	35.5308	5.0273	1e-12	5.04e-09	6.826	5.2052	0.000485	0.643676	0.026519	0.805685	0.6	1	0.933578	0.000150326	0.0158	4.3154	0.996329	0.140107
FB-ADIPO	SYK-BLNK	36.2236	3.5051	0	0	9.5771	3.7823	0.000261	0.609304	0.029401	0.805685	0.4	0.869191	0.906304	1.09e-05	-0.0323	4.5012	0.994388	0.0516841
FB-ADIPO	OGT-TET1	28.9262	5.833	5.33e-05	0.0221613	4.6317	6.2453	0.007921	0.912738	0.029401	0.805685	0.9	1	0.295019	0.00163625	0.3093	2.63	0.978962	0.381833
FB-ADIPO	PPP2CA-PRKCB	40.3879	9.4678	8.2e-05	0.0314476	4.0155	10.0579	0.021712	0.912738	0.029401	0.805685	1	1	0.920748	0.00282595	-0.0263	4.5024	0.995237	0.461643
FB-ADIPO	LYN-MAP4K1	15.8766	2.8639	4.51e-06	0.0028534	5.1555	3.0796	0.002111	0.861806	0.026519	0.805685	0.92	1	0.945317	0.00084603	0.0221	1.6902	0.997081	0.286994
FB-ADIPO	MMP2-TGFB1	31.4552	4.5263	1.55e-08	2.34e-05	7.2558	4.3352	0.002467	0.892553	0.029401	0.805685	0.84	1	0.436617	0.000118103	-0.3102	3.2034	0.978962	0.131471
FB-ADIPO	SRC-FGR	15.288	2.3762	1.13e-06	0.000885113	7.131	2.1439	0.000737	0.674854	0.026519	0.805685	0.74	1	0.0868651	0.000348159	0.4189	2.2208	0.963808	0.193996
FB-ADIPO	GNAS-HCK	41.8248	7.0569	8.35e-07	0.000683092	5.2712	7.9346	0.002928	0.912738	0.026519	0.805685	0.22	0.701829	0.295879	0.000523648	-0.3446	3.7939	0.978962	0.232206
FB-ADIPO	IRF1-IRF8	24.16	4.9741	0.000114629	0.0410637	4.2056	5.7448	0.008005	0.912738	0.026519	0.805685	0.8	1	0.393244	0.00186056	0.2668	3.0707	0.978962	0.398696
FB-ADIPO	PRKCA-PLEK	32.7305	5.5523	5.1e-07	0.000455269	5.8036	5.6397	0.005772	0.912738	0.029401	0.805685	0.88	1	0.711997	0.000588599	0.1412	2.8262	0.981933	0.24327
FB-ADIPO	PRKACA-ALOX5	20.1552	4.1333	5.12e-05	0.0214424	4.4177	4.5624	0.006647	0.912738	0.029401	0.805685	1	1	0.901987	0.00168264	0.0573	2.7181	0.994202	0.385188
FB-ADIPO	PRKACA-PTPN7	12.2487	2.301	9.73e-06	0.00540333	5.7982	2.1125	0.004587	0.912738	0.026519	0.805685	0.08	0.450284	0.901987	0.000603918	0.0573	1.6758	0.994202	0.248557
FB-ADIPO	KRAS-PIK3CD	37.9763	5.5041	5.38e-09	9.62e-06	6.5627	5.7867	0.003285	0.912738	0.026519	0.805685	0.66	1	0.987363	0.000218079	-0.0033	3.9967	0.999318	0.159481
FB-ADIPO	PTPRG-PDGFRB	52.2315	6.9082	7.8e-11	2.54e-07	6.3984	8.1632	0.000687	0.661958	0.026519	0.805685	0.1	0.497333	0.302808	0.000150326	0.4549	4.3154	0.978962	0.140107
FB-ADIPO	PPP1CB-IKZF1	42.1453	6.5662	4.15e-08	5.42e-05	5.6261	7.491	0.009003	0.912738	0.029401	0.805685	1	1	0.618661	0.000488302	0.1071	4.281	0.979433	0.224498
FB-ADIPO	GNAI1-PLD2	24.9976	3.9973	1.03e-06	0.000817793	5.3888	4.6388	0.001781	0.831973	0.026519	0.805685	0.1	0.497333	0.317557	0.000382609	0.5533	3.2806	0.978962	0.201516
FB-ADIPO	SYK-SH3BP2	24.9565	3.5595	2.61e-09	5.23e-06	6.9741	3.5784	0.000553	0.643809	0.029401	0.805685	0.62	1	0.906304	0.000160782	-0.0323	3.1125	0.994388	0.140335
FB-ADIPO	DYRK1A-FOXO6	16.5222	3.2748	3.69e-05	0.016403	5.066	3.2614	0.002313	0.8777	0.026519	0.805685	0.02	0.195524	0.187082	0.0014551	0.3737	1.6156	0.965251	0.360083
FB-ADIPO	S1PR2-GNA14	17.3534	2.7789	3.18e-06	0.00213947	7.045	2.4632	0.000461	0.642622	0.026519	0.805685	0.08	0.450284	0.32201	0.000279836	0.3476	2.3419	0.978962	0.17718
FB-ADIPO	ABL1-MAP4K1	16.1646	2.8865	1.9e-06	0.00138079	5.5793	2.8973	0.001419	0.791622	0.026519	0.805685	0.24	0.729859	0.118404	0.00084603	0.3916	1.6902	0.963808	0.286994
FB-ADIPO	EGFR-PLD2	39.5717	6.3621	1.74e-06	0.00128028	5.7317	6.904	0.002216	0.87059	0.026519	0.805685	0.04	0.307385	0.4142	0.000382609	0.543	3.2806	0.978962	0.201516
FB-ADIPO	PRKCB-C5AR1	18.8129	3.9399	0.000131498	0.0457923	4.9165	3.8265	0.003547	0.912738	0.029401	0.805685	0.16	0.615014	0.575589	0.000254419	0.6473	2.8409	0.979433	0.171022
FB-ADIPO	SP1-ITGA11	23.1233	3.2766	4.23e-09	7.88e-06	7.1679	3.226	0.000558	0.643809	0.026519	0.805685	0.2	0.676998	0.753498	0.000189834	0.0878	2.6556	0.983861	0.149976
FB-ADIPO	FYN-PDGFRB	47.9182	6.5409	4.53e-10	1.16e-06	6.834	7.0118	0.000482	0.643676	0.026519	0.805685	0.62	1	0.0908627	0.000150326	0.519	4.3154	0.963808	0.140107
FB-ADIPO	SRC-PDGFRB	29.5882	3.9422	1.3e-11	5.26e-08	7.6892	3.848	0.000255	0.608227	0.026519	0.805685	0.64	1	0.0868651	0.000150326	0.4189	4.3154	0.963808	0.140107
FB-ADIPO	PTK2-PDGFRB	47.3246	6.3726	5.08e-10	1.28e-06	6.649	7.1175	0.000565	0.643809	0.026519	0.805685	1	1	0.443198	0.000150326	0.2205	4.3154	0.978962	0.140107
FB-ADIPO	SRC-SH3PXD2B	23.3795	4.1338	4.23e-06	0.00270165	5.3492	4.3706	0.002605	0.904193	0.029401	0.805685	0.94	1	0.0868651	0.000931416	0.4189	3.3877	0.963808	0.29748
FB-ADIPO	ETS1-ITGA11	26.9431	3.8144	1.45e-08	2.22e-05	6.6247	4.0671	0.000886	0.709006	0.026519	0.805685	1	1	0.344954	0.000189834	0.3353	2.6556	0.978962	0.149976
FB-ADIPO	PRKCA-PLD2	38.2304	5.8956	6.21e-08	7.68e-05	6.067	6.3014	0.002504	0.895679	0.026519	0.805685	0.32	0.807536	0.711997	0.000382609	0.1412	3.2806	0.981933	0.201516
FB-ADIPO	PRKCA-ADRA1B	34.9087	6.5061	0.000115622	0.0413248	8.0679	4.3268	0.00293	0.912738	0.133333	1	0.56	0.979773	0.711997	0.00234054	0.1412	3.017	0.981933	0.428566
FB-ADIPO	PRKCA-HRH1	35.741	5.8106	1.74e-07	0.000184759	9.245	3.866	0.002051	0.858148	0.133333	1	0.78	1	0.711997	0.00140709	0.1412	3.0894	0.981933	0.355237
FB-ADIPO	PRKCA-FERMT3	32.8628	5.7248	4.84e-06	0.00301893	5.2371	6.2751	0.002008	0.852701	0.026519	0.805685	0.36	0.838242	0.711997	0.000768506	0.1412	2.8439	0.981933	0.276916
FB-ADIPO	PRKACA-RGS10	23.6107	3.1956	2.27e-10	6.47e-07	8.5417	2.7642	0.000443	0.642622	0.026519	0.805685	0.44	0.903094	0.901987	9.41e-05	0.0573	3.1716	0.994202	0.118182
FB-ADIPO	PRKACA-KCNH2	12.7397	2.4369	2.1e-05	0.0102182	9.0969	1.4004	0.000879	0.70816	0.133333	1	0.7	1	0.901987	0.00233063	0.0573	1.7317	0.994202	0.427783
FB-ADIPO	PTPN2-PDGFRB	34.5744	4.7332	2.45e-10	6.94e-07	6.7823	5.0978	0.000553	0.643809	0.026519	0.805685	1	1	0.374563	0.000150326	-0.204	4.3154	0.978962	0.140107
FB-ADIPO	CSNK2A2-ARRB2	30.3715	3.82	0	0	12.1428	2.5012	0.001099	0.746259	0.133333	1	0.14	0.580719	0.448422	0.000354138	-0.1583	3.6029	0.978962	0.195427
FB-ADIPO	CHRM3-GNA14	22.687	3.3785	3.53e-09	6.74e-06	6.3415	3.5776	0.000936	0.715785	0.026519	0.805685	1	1	0.270639	0.000279836	0.5843	2.3419	0.976528	0.17718
FB-ADIPO	CHRM3-GNA15	29.3867	3.2062	0	0	12.0741	2.4339	0.00053	0.643809	0.133333	1	0.1	0.497333	0.270639	0.000150282	0.5843	3.0585	0.976528	0.140107
FB-ADIPO	PTPRG-BLNK	54.5673	5.0152	0	0	10.1697	5.3657	0.000541	0.643809	0.029401	0.805685	0.04	0.307385	0.302808	1.09e-05	0.4549	4.5012	0.978962	0.0516841
FB-ADIPO	ACP1-PDGFRB	30.5722	4.7031	3.72e-09	7.06e-06	7.0123	4.3598	0.000438	0.642622	0.026519	0.805685	0.78	1	0.667919	0.000150326	-0.1802	4.3154	0.980642	0.140107
FB-ADIPO	HRH2-GNA14	10.2348	1.5735	1.12e-09	2.51e-06	4.4875	2.2807	0.010823	0.912738	0.026519	0.805685	0.06	0.384333	0.059176	0.000279836	1.0387	2.3419	0.963808	0.17718
FB-ADIPO	EDNRA-GNA14	15.9231	3.1658	1.24e-05	0.00659604	4.5651	3.488	0.005022	0.912738	0.026519	0.805685	0.68	1	0.980459	0.000279836	-0.0269	2.3419	0.999242	0.17718
FB-ADIPO	F2R-GNA14	16.9166	2.9886	3.87e-06	0.00251467	6.6756	2.5341	0.001495	0.800806	0.026519	0.805685	0.74	1	0.154815	0.000279836	-0.8627	2.3419	0.96411	0.17718
FB-ADIPO	F2R-GNA15	22.7082	2.9304	0	0	12.8108	1.7726	0.000242	0.597361	0.133333	1	1	1	0.154815	0.000150282	-0.8627	3.0585	0.96411	0.140107
FB-ADIPO	PIK3R1-PIK3CD	40.321	6	3.75e-07	0.000353584	6.7207	5.9995	0.004734	0.912738	0.026519	0.805685	0.52	0.957827	0.755844	0.000218079	0.0931	3.9967	0.983861	0.159481
FB-ADIPO	MAPK1-ALOX5	26.571	5.6312	6.82e-05	0.0270852	4.7114	5.6398	0.005833	0.912738	0.029401	0.805685	0.54	0.967114	0.688446	0.00168264	0.0841	2.7181	0.981022	0.385188
FB-ADIPO	MAPK1-PTPN7	16.4139	2.8364	1.61e-06	0.00119387	6.2606	2.6218	0.002668	0.909134	0.026519	0.805685	0.04	0.307385	0.688446	0.000603918	0.0841	1.6758	0.981022	0.248557
FB-ADIPO	MAPK1-CIITA	31.8375	5.9714	2.44e-08	3.46e-05	4.9414	6.443	0.009897	0.912738	0.029401	0.805685	0.36	0.838242	0.688446	0.00126715	0.0841	3.2552	0.981022	0.342557
FB-ADIPO	ADORA2A-GNA14	12.3895	2.423	5.37e-05	0.0222991	5.3624	2.3104	0.002381	0.883288	0.026519	0.805685	0.22	0.701829	0.633868	0.000279836	0.4152	2.3419	0.979796	0.17718
FB-ADIPO	AGTR1A-GNA14	14.0376	2.512	1.18e-06	0.000918161	4.8253	2.9092	0.003412	0.912738	0.026519	0.805685	0.36	0.838242	0.771296	0.000279836	0.22	2.3419	0.984537	0.17718
FB-ADIPO	AGTR1A-GNA15	18.2945	3.0445	6.17e-08	7.63e-05	10.9101	1.6768	0.000567	0.643809	0.133333	1	0.04	0.307385	0.771296	0.000150282	0.22	3.0585	0.984537	0.140107
FB-ADIPO	CCKBR-GNA15	13.4288	1.75	0	0	12.0729	1.1123	0.000403	0.636334	0.133333	1	1	1	0.840226	0.000150282	-0.0762	3.0585	0.989911	0.140107
FB-ADIPO	RFX5-CIITA	18.2868	3.5815	1.58e-05	0.00810564	4.6576	3.9262	0.005867	0.912738	0.029401	0.805685	0.76	1	0.474728	0.00126715	0.2212	3.2552	0.978962	0.342557
FB-ADIPO	ADRA1A-GNA14	15.2545	3.0136	7.43e-05	0.0290634	4.3961	3.47	0.0087	0.912738	0.026519	0.805685	0.34	0.822069	0.109882	0.000279836	2.4784	2.3419	0.963808	0.17718
FB-ADIPO	FBN1-TGFB1	41.9975	5.5252	2.1e-11	8.08e-08	6.848	6.1328	0.000748	0.67662	0.029401	0.805685	0.54	0.967114	0.12278	0.000118103	0.7537	3.2034	0.963808	0.131471
FB-ADIPO	PPP1CC-IKZF1	36.8111	5.9539	6.17e-08	7.63e-05	5.6451	6.5209	0.009662	0.912738	0.029401	0.805685	1	1	0.796854	0.000488302	0.0679	4.281	0.986704	0.224498
FB-ADIPO	P2RY2-GNA15	18.477	2.0516	0	0	14.8486	1.2444	0.000139	0.491475	0.133333	1	0.68	1	0.289041	0.000150282	-0.2726	3.0585	0.978962	0.140107
FB-ADIPO	CSK-FGR	14.9948	2.4084	2.51e-06	0.00174663	6.3494	2.3616	0.001199	0.763799	0.026519	0.805685	1	1	0.827898	0.000348159	0.0973	2.2208	0.989023	0.193996
FB-ADIPO	HTR2B-GNA14	12.834	2.3416	1.69e-06	0.00124864	6.313	2.033	0.001253	0.772101	0.026519	0.805685	0.96	1	0.112482	0.000279836	-0.8842	2.3419	0.963808	0.17718
FB-ADIPO	PTGFR-GNA14	16.8003	2.6411	1.09e-08	1.75e-05	6.8381	2.4569	0.000488	0.643809	0.026519	0.805685	0.62	1	0.947687	0.000279836	0.0202	2.3419	0.997197	0.17718
FB-ADIPO	SYK-IKZF1	34.3469	5.9677	3e-05	0.0137784	5.6615	6.0668	0.009639	0.912738	0.029401	0.805685	0.56	0.979773	0.906304	0.000488302	-0.0323	4.281	0.994388	0.224498
FB-ADIPO	SYK-MAP4K1	13.6796	2.5184	1.5e-05	0.00775164	5.1402	2.6613	0.002164	0.865536	0.026519	0.805685	1	1	0.906304	0.00084603	-0.0323	1.6902	0.994388	0.286994
FB-ADIPO	LPAR6-GNA14	16.4156	2.3256	1.61e-07	0.00017345	6.1989	2.6482	0.000957	0.718864	0.026519	0.805685	0.3	0.789097	0.382531	0.000279836	0.3786	2.3419	0.978962	0.17718
FB-ADIPO	CRKL-MAP4K1	13.1562	2.4729	3.46e-05	0.0154953	5.628	2.3376	0.001535	0.803299	0.026519	0.805685	0.74	1	0.545193	0.00084603	-0.1213	1.6902	0.978962	0.286994
FB-ADIPO	NEDD4-KCNH2	20.8149	3.8356	4.66e-06	0.00293193	9.3553	2.2249	0.000875	0.706898	0.133333	1	0.26	0.750887	0.612252	0.00233063	0.1036	1.7317	0.979433	0.427783
FB-ADIPO	P2RY1-GNA15	20.9251	2.4498	4e-12	1.82e-08	11.2783	1.8554	0.000635	0.649659	0.133333	1	1	1	0.264982	0.000150282	0.501	3.0585	0.975606	0.140107
FB-ADIPO	CSNK1A1-GLI3	42.4263	8.6035	0.000121511	0.042913	4.5792	9.265	0.014763	0.912738	0.029401	0.805685	0.12	0.539527	0.792703	0.00130585	-0.057	3.9078	0.986188	0.344881
FB-ADIPO	FNTA-MRAS	20.972	3.5497	2.5e-07	0.00025067	5.9455	3.5274	0.002624	0.905534	0.029401	0.805685	0.34	0.822069	0.925743	0.000415993	0.0201	2.7399	0.995307	0.210239
FB-ADIPO	FNTB-MRAS	20.9719	3.4789	3.78e-05	0.0167093	6.1842	3.3912	0.00239	0.885032	0.029401	0.805685	1	1	0.760988	0.000415993	0.0879	2.7399	0.984239	0.210239
FB-ADIPO	GSK3B-CIITA	34.9476	6.7772	7.97e-05	0.0307671	4.8502	7.2055	0.010616	0.912738	0.029401	0.805685	1	1	0.922235	0.00126715	-0.0215	3.2552	0.995237	0.342557
FB-ADIPO	CDK7-RARG	25.4953	4.3554	1.44e-05	0.00750707	5.6646	4.5008	0.007555	0.912738	0.029401	0.805685	1	1	0.688334	0.000507761	0.101	2.9885	0.981022	0.227732
FB-ADIPO	GRB2-MAP4K1	15.2626	2.8256	5.85e-06	0.00354459	5.5244	2.7628	0.001486	0.799625	0.026519	0.805685	0.14	0.580719	0.570047	0.00084603	0.1328	1.6902	0.979433	0.286994
FB-ADIPO	CSNK2A1-ARRB2	34.2745	4.2623	0	0	11.8608	2.8897	0.001181	0.760566	0.133333	1	0.12	0.539527	0.767788	0.000354138	0.0591	3.6029	0.984537	0.195427
FB-ADIPO	CSNK2A1-IKZF1	40.7515	6.7494	7.17e-07	0.000602111	5.6677	7.1901	0.009089	0.912738	0.029401	0.805685	0.86	1	0.767788	0.000488302	0.0591	4.281	0.984537	0.224498
FB-ADIPO	CDK5-DNM1	16.1944	2.5476	1.57e-07	0.000169299	5.8475	2.7695	0.001143	0.754073	0.026519	0.805685	0.96	1	0.738807	0.00029676	-0.1094	2.7824	0.983072	0.181309
FB-ADIPO	MC1R-GNA14	10.3507	2.0311	4.28e-05	0.0185422	6.0427	1.7129	0.001599	0.813536	0.026519	0.805685	0.24	0.729859	0.961789	0.000279836	-0.0319	2.3419	0.998484	0.17718
FB-ADIPO	MAP2K1-ARRB2	31.5704	3.9309	2.49e-08	3.51e-05	11.913	2.6501	0.001158	0.755948	0.133333	1	1	1	0.246038	0.000354138	0.2396	3.6029	0.972914	0.195427
FB-ADIPO	SP3-ITGA11	27.4233	4.1756	8.86e-08	0.000104119	6.7051	4.0899	0.00099	0.725301	0.026519	0.805685	0.44	0.903094	0.163693	0.000189834	0.2903	2.6556	0.96517	0.149976
FB-ADIPO	PRKCD-PLD2	24.1223	4.0441	3.62e-07	0.000343563	5.7314	4.2088	0.003719	0.912738	0.026519	0.805685	0.22	0.701829	0.583623	0.000382609	-0.1335	3.2806	0.979433	0.201516
FB-ADIPO	PRKCD-C5AR1	21.0366	3.2387	1.62e-05	0.00825415	6.0131	3.4985	0.000984	0.723317	0.029401	0.805685	1	1	0.583623	0.000254419	-0.1335	2.8409	0.979433	0.171022
FB-ADIPO	PTPRJ-PDGFRB	46.9301	6.4697	2.23e-10	6.37e-07	6.6759	7.0298	0.00055	0.643809	0.026519	0.805685	0.14	0.580719	0.494459	0.000150326	0.2182	4.3154	0.978962	0.140107
FB-ADIPO	PAK2-CASP7	31.4016	5.6495	2.34e-05	0.0111691	5.0406	6.2298	0.014286	0.912738	0.029401	0.805685	1	1	0.767897	0.00092649	-0.0609	3.1867	0.984537	0.297225
FB-ADIPO	ATR-WDHD1	22.196	3.4106	4.51e-08	5.85e-05	6.3266	3.5084	0.004046	0.912738	0.029401	0.805685	1	1	0.933834	0.000342285	0.0225	2.5736	0.996329	0.192566
FB-ADIPO	DYRK1A-DNM1	28.4346	4.5426	1.92e-07	0.000201361	6.294	4.5178	0.001027	0.731434	0.026519	0.805685	0.12	0.539527	0.187082	0.00029676	0.3737	2.7824	0.965251	0.181309
FB-ADIPO	PRKG1-HRH1	39.3335	6.2741	4.11e-07	0.000381629	8.6998	4.5212	0.002552	0.899727	0.133333	1	1	1	0.48989	0.00140709	0.2818	3.0894	0.978962	0.355237
FB-ADIPO	LTBP1-TGFB1	36.9004	4.6592	1e-12	5.04e-09	7.5217	4.9059	0.00158	0.81126	0.029401	0.805685	0.9	1	0.271255	0.000118103	0.3788	3.2034	0.976528	0.131471
FB-ADIPO	P2RY6-GNA15	16.5844	3.0324	7.69e-06	0.00443621	5.6093	2.9566	0.009496	0.912738	0.133333	1	1	1	0.46399	0.000150282	-0.6241	3.0585	0.978962	0.140107
FB-ADIPO	PXN-PTPRO	31.7051	6.094	3.79e-05	0.0167771	4.9578	6.395	0.007812	0.912738	0.029401	0.805685	0.46	0.917918	0.209982	0.00117538	0.3414	3.698	0.968638	0.331896
FB-ADIPO	PTK2-ITGB8	29.5481	3.7478	1.66e-10	4.88e-07	7.7567	3.8094	0.001528	0.802608	0.026519	0.805685	1	1	0.443198	8.9e-05	0.2205	2.6891	0.978962	0.115523
FB-ADIPO	PRKCA-ITGB8	31.0006	3.9183	1.42e-10	4.25e-07	8.5571	3.6228	0.000836	0.698332	0.026519	0.805685	0.14	0.580719	0.711997	8.9e-05	0.1412	2.6891	0.981933	0.115523
FB-ADIPO	SRC-ITGB8	18.3218	2.2753	0	0	8.6055	2.1291	0.001133	0.752446	0.026519	0.805685	0.52	0.957827	0.0868651	8.9e-05	0.4189	2.6891	0.963808	0.115523
FB-ADIPO	CSK-ITGA11	17.8227	2.7319	1.45e-07	0.000158358	7.5016	2.3759	0.000375	0.629432	0.026519	0.805685	0.96	1	0.827898	0.000189834	0.0973	2.6556	0.989023	0.149976
FB-ADIPO	CSK-ITGB8	18.2156	2.4848	7.8e-11	2.54e-07	7.0974	2.5665	0.002731	0.912738	0.026519	0.805685	0.94	1	0.827898	8.9e-05	0.0973	2.6891	0.989023	0.115523
FB-ADIPO	EGFR-CEACAM1	25.3816	5.2835	0.000145111	0.0494767	4.809	5.278	0.004233	0.912738	0.029401	0.805685	0.32	0.807536	0.4142	0.00230362	0.543	2.13	0.978962	0.427282
FB-ADIPO	ACVRL1-TGFB1	26.8305	3.6246	2.35e-09	4.76e-06	7.5405	3.5582	0.002477	0.894237	0.029401	0.805685	0.16	0.615014	0.656688	0.000118103	-0.1024	3.2034	0.980425	0.131471
FB-ADIPO	COL1A1-ITGA11	28.4446	4.1929	1.2e-07	0.000134278	7.1171	3.9966	0.000527	0.643809	0.026519	0.805685	0.12	0.539527	0.47414	0.000189834	-0.4177	2.6556	0.978962	0.149976
FB-ADIPO	IL18-CD48	16.8462	2.9399	1.26e-06	0.000972207	5.2452	3.2117	0.002653	0.908379	0.029401	0.805685	0.4	0.869191	0.566869	0.000417371	0.3175	3.3256	0.979433	0.210435
FB-ADIPO	COL1A2-ITGA11	30.8704	4.4604	1.27e-08	1.98e-05	7.2525	4.2565	0.000451	0.642622	0.026519	0.805685	0.5	0.944488	0.542221	0.000189834	-0.2116	2.6556	0.978962	0.149976
FB-ADIPO	CD44-HAS2	17.0922	3.6308	6.99e-05	0.0276169	6.3653	2.6852	0.007829	0.912738	0.133333	1	1	1	0.380941	0.00355974	0.6701	2.1006	0.978962	0.502357
FB-ADIPO	FN1-C5AR1	24.2798	4.3808	1.08e-05	0.00588293	6.6121	3.672	0.000974	0.721438	0.029401	0.805685	0.06	0.384333	0.892387	0.000254419	-0.1402	2.8409	0.99323	0.171022
FB-ADIPO	COL4A1-ITGB8	31.1229	3.9742	6.75e-10	1.62e-06	9.4175	3.3048	0.000403	0.636334	0.026519	0.805685	0.06	0.384333	0.840283	8.9e-05	-0.0751	2.6891	0.989911	0.115523
FB-ADIPO	FN1-ITGB8	23.437	3.7422	1.8e-07	0.0001903	7.328	3.1983	0.001788	0.831973	0.026519	0.805685	0.5	0.944488	0.892387	8.9e-05	-0.1402	2.6891	0.99323	0.115523
FB-ADIPO	IL16-CCR5	31.9427	5.6631	1.99e-05	0.00977854	5.2127	6.1278	0.0021	0.8603	0.029401	0.805685	0.24	0.729859	0.413293	0.00101983	0.2325	3.4759	0.978962	0.310768
FB-ADIPO	TNFSF13B-CD40	14.4497	2.9077	4.76e-06	0.00297801	5.1124	2.8264	0.002257	0.873575	0.029401	0.805685	1	1	0.0187111	0.00269459	0.7668	2.2664	0.846363	0.453264
FB-ADIPO	CLEC11A-ITGA11	10.0225	2.0952	0.000110223	0.0398229	6.8851	1.4557	0.000464	0.643676	0.026519	0.805685	0.24	0.729859	0.95996	0.000189834	-0.033	2.6556	0.998363	0.149976
FB-ADIPO	SH2B3-PDGFRB	29.1357	5.0216	9.94e-06	0.00549352	6.9201	4.2103	0.000451	0.642622	0.026519	0.805685	0.02	0.195524	0.759569	0.000150326	0.2941	4.3154	0.984239	0.140107
FB-ADIPO	COL3A1-LAIR1	50.6105	9.6048	2.92e-05	0.0134344	4.659	10.863	0.014136	0.912738	0.029401	0.805685	0.7	1	0.997856	0.00125973	-0.0013	4.0237	0.99968	0.342374
FB-ADIPO	CD59B-SIGLEC1	7.9789	1.5673	2.84e-05	0.0131253	9.1032	0.8765	0.0001	0.44233	0.029401	0.805685	1	1	0.0412249	0.000805418	1.343	1.9994	0.963808	0.281901
FB-ADIPO	CD47-SIGLEC1	20.8636	3.525	3.72e-07	0.000351532	5.3748	3.8818	0.001941	0.847066	0.029401	0.805685	1	1	0.597742	0.000805418	0.1579	1.9994	0.979433	0.281901
FB-ADIPO	DCN-TGFB1	44.405	6.2957	2.23e-09	4.57e-06	7.6999	5.7669	0.001874	0.839861	0.029401	0.805685	0.78	1	0.530427	0.000118103	0.4516	3.2034	0.978962	0.131471
FB-ADIPO	NRP1-PDGFRB	49.7399	6.8792	8e-12	3.41e-08	6.3332	7.8539	0.000725	0.672806	0.026519	0.805685	0.1	0.497333	0.470445	0.000150326	0.2758	4.3154	0.978962	0.140107
FB-ADIPO	COL5A2-LAIR1	47.4536	9.2751	1.36e-05	0.00716081	4.8492	9.7858	0.011138	0.912738	0.029401	0.805685	0.7	1	0.780628	0.00125973	0.0952	4.0237	0.985315	0.342374
FB-ADIPO	COL5A1-LAIR1	44.7592	8.6923	7.37e-06	0.00428628	4.7767	9.3703	0.013191	0.912738	0.029401	0.805685	0.36	0.838242	0.967148	0.00125973	0.0105	4.0237	0.999018	0.342374
FB-ADIPO	EPHA7-PILRB2	13.4071	2.5859	1.29e-05	0.00683473	8.2854	1.6182	0.00273	0.912738	0.133333	1	1	1	0.920496	0.00312918	0.0281	1.571	0.995237	0.474992
FB-ADIPO	NEGR1-IGSF9B	20.3115	3.1899	3.16e-08	4.31e-05	7.0455	2.8829	0.000819	0.693269	0.026519	0.805685	0.68	1	0.385106	0.000335495	0.3621	1.6792	0.978962	0.190969
FB-ADIPO	EFNB1-LVRN	18.4674	3.717	9.98e-06	0.00551592	6.0144	3.0705	0.001279	0.772679	0.029401	0.805685	1	1	0.934944	0.000368856	-0.0583	3.3732	0.996377	0.199234
FB-ADIPO	IL1RAPL1-PILRB2	14.3071	2.8651	6.54e-06	0.00388315	8.7934	1.627	0.00191	0.842588	0.133333	1	1	1	0.818792	0.00312918	-0.0774	1.571	0.988433	0.474992
FB-ADIPO	LAMB1-ITGB8	29.193	3.6749	4e-12	1.82e-08	8.6154	3.3884	0.000982	0.723317	0.026519	0.805685	1	1	0.6748	8.9e-05	0.122	2.6891	0.980642	0.115523
FB-ADIPO	PRKCA-C5AR1	32.9338	5.0546	5.59e-08	7.02e-05	6.484	5.0793	0.000644	0.649988	0.029401	0.805685	0.86	1	0.711997	0.000254419	0.1412	2.8409	0.981933	0.171022
FB-ADIPO	MAPK1-NCF2	33.1617	4.4333	0	0	7.1775	4.6202	0.000423	0.642071	0.029401	0.805685	0.8	1	0.688446	0.000120624	0.0841	3.3994	0.981022	0.132653
FB-ADIPO	MAPK1-ARRB2	35.1311	4.2823	3e-12	1.4e-08	12.5417	2.8012	0.001	0.72649	0.133333	1	1	1	0.688446	0.000354138	0.0841	3.6029	0.981022	0.195427
FB-ADIPO	PRKCA-KCNH2	20.054	3.666	2.45e-07	0.000246867	9.4632	2.1192	0.000864	0.704575	0.133333	1	0.08	0.450284	0.711997	0.00233063	0.1412	1.7317	0.981933	0.427783
FB-ADIPO	PRKCA-GPSM2	22.5047	3.5158	1.44e-06	0.00108713	6.3051	3.5693	0.002687	0.910372	0.026519	0.805685	0.78	1	0.711997	0.000346578	0.1412	1.9417	0.981933	0.193669
FB-ADIPO	HIPK2-RUNX1	42.7689	9.5434	8.88e-05	0.0335485	3.8936	10.9845	0.027452	0.912738	0.029401	0.805685	0.64	1	0.702155	0.0032728	0.1016	5.0033	0.981235	0.485852
FB-ADIPO	PRKG2-PDGFRB	19.6791	2.8324	1.21e-10	3.72e-07	5.4744	3.5948	0.002142	0.864402	0.026519	0.805685	1	1	0.302064	0.000150326	0.4555	4.3154	0.978962	0.140107
FB-ADIPO	PDGFRA-CCDC88C	41.1936	5.4422	2.8e-11	1.04e-07	7.5611	5.4481	0.000305	0.620397	0.026519	0.805685	0.48	0.9325	0.322884	0.000143891	0.2877	3.4923	0.978962	0.139189
FB-ADIPO	SRC-PLD2	22.4477	3.4766	1.29e-09	2.84e-06	6.1419	3.6548	0.002579	0.902417	0.026519	0.805685	0.32	0.807536	0.0868651	0.000382609	0.4189	3.2806	0.963808	0.201516
FB-ADIPO	PRKACA-NKD2	11.239	2.1628	3.98e-05	0.0174391	5.7538	1.9533	0.006105	0.912738	0.029401	0.805685	0.2	0.676998	0.901987	0.000830643	0.0573	1.5295	0.994202	0.285836
FB-ADIPO	PRKCQ-PTPN7	9.7913	1.9583	1.18e-05	0.00634053	7.0987	1.3793	0.001209	0.764432	0.026519	0.805685	0.02	0.195524	0.324152	0.000603918	0.8494	1.6758	0.978962	0.248557
FB-ADIPO	CDK5-PLD2	18.8109	3.2	3.47e-06	0.00230082	5.9988	3.1358	0.005488	0.912738	0.026519	0.805685	0.74	1	0.738807	0.000382609	-0.1094	3.2806	0.983072	0.201516
FB-ADIPO	GSK3B-APBB1	16.4321	3.2343	6.13e-05	0.0248323	5.3173	3.0903	0.002167	0.865665	0.026519	0.805685	0.64	1	0.922235	0.00119839	-0.0215	1.5354	0.995237	0.334493
FB-ADIPO	PRKD1-KCNH2	16.5064	3.1461	8e-05	0.0308117	8.721	1.8927	0.001295	0.774218	0.133333	1	0.76	1	0.887935	0.00233063	0.0613	1.7317	0.992844	0.427783
FB-ADIPO	PRKCQ-RASGRP1	13.1308	2.531	1.06e-05	0.00579147	5.4371	2.415	0.006765	0.912738	0.026519	0.805685	0.48	0.9325	0.324152	0.000513075	0.8494	2.2974	0.978962	0.229141
FB-ADIPO	PPP1CB-PTPN7	16.516	2.9117	2.48e-05	0.0117267	6.2505	2.6423	0.003273	0.912738	0.026519	0.805685	0.44	0.903094	0.618661	0.000603918	0.1071	1.6758	0.979433	0.248557
FB-ADIPO	PPP3CA-DNM1	33.1503	5.1271	1.46e-08	2.23e-05	6.0171	5.5093	0.001171	0.759469	0.026519	0.805685	0.02	0.195524	0.310622	0.00029676	0.2956	2.7824	0.978962	0.181309
FB-ADIPO	PPP3CB-DNM1	27.4681	4.102	6.43e-09	1.12e-05	6.1908	4.4369	0.001223	0.766202	0.026519	0.805685	0.72	1	0.385556	0.00029676	0.2155	2.7824	0.978962	0.181309
FB-ADIPO	PPP3CC-DNM1	24.1504	3.8572	6.35e-07	0.000545026	6.0392	3.999	0.000997	0.726231	0.026519	0.805685	0.16	0.615014	0.101479	0.00029676	0.4393	2.7824	0.963808	0.181309
FB-ADIPO	PPP4C-MAP4K1	12.2581	2.1925	9.02e-06	0.00506881	5.5863	2.1943	0.001398	0.787531	0.026519	0.805685	0.22	0.701829	0.779868	0.00084603	-0.0632	1.6902	0.985149	0.286994
FB-ADIPO	PTEN-PDGFRB	46.6909	6.6641	1.96e-09	4.07e-06	6.5445	7.1343	0.00062	0.647787	0.026519	0.805685	0.7	1	0.913896	0.000150326	-0.038	4.3154	0.995164	0.140107
FB-ADIPO	PTPN3-CD247	22.3287	4.0051	1.2e-05	0.00644536	5.822	3.8352	0.001293	0.773724	0.029401	0.805685	1	1	0.236184	0.000675082	0.3928	2.3573	0.97136	0.265524
FB-ADIPO	PTPN4-CD247	20.973	3.7527	6.04e-06	0.00363991	5.1916	4.0398	0.002763	0.912738	0.029401	0.805685	1	1	0.135781	0.000675082	0.5226	2.3573	0.963808	0.265524
FB-ADIPO	DUSP3-PDGFRB	36.8162	5.3269	6.37e-08	7.85e-05	7.2947	5.047	0.000371	0.629432	0.026519	0.805685	0.34	0.822069	0.530513	0.000150326	-0.2673	4.3154	0.978962	0.140107
FB-ADIPO	GRK2-PDGFRB	28.6267	4.5399	2.55e-07	0.000254976	5.9968	4.7736	0.001239	0.769932	0.026519	0.805685	0.06	0.384333	0.857082	0.000150326	0.1261	4.3154	0.989911	0.140107
FB-ADIPO	FYN-CD247	26.3418	4.4709	2.93e-06	0.00199073	5.65	4.6623	0.001554	0.806835	0.029401	0.805685	1	1	0.0908627	0.000675082	0.519	2.3573	0.963808	0.265524
FB-ADIPO	PRKCA-SH3BP2	36.0718	5.0529	3.84e-10	1.01e-06	7.0444	5.1206	0.000541	0.643809	0.029401	0.805685	1	1	0.711997	0.000160782	0.1412	3.1125	0.981933	0.140335
FB-ADIPO	BCR-HCK	34.6947	5.6824	1.06e-07	0.000121185	5.9443	5.8366	0.001909	0.842485	0.026519	0.805685	0.32	0.807536	0.308915	0.000523648	0.2366	3.7939	0.978962	0.232206
FB-ADIPO	GRK2-HRH1	20.2081	3.9379	5.7e-05	0.0233753	8.2051	2.4629	0.002895	0.912738	0.133333	1	0.66	1	0.857082	0.00140709	0.1261	3.0894	0.989911	0.355237
FB-ADIPO	EGFR-APBB1	18.3672	3.5826	3.96e-05	0.0173524	5.2156	3.5216	0.002136	0.864263	0.026519	0.805685	0.2	0.676998	0.4142	0.00119839	0.543	1.5354	0.978962	0.334493
FB-ADIPO	ERBB2-APBB1	9.1706	1.7326	1.48e-05	0.00765718	5.2755	1.7383	0.001994	0.851748	0.026519	0.805685	0.98	1	0.294178	0.00119839	0.3782	1.5354	0.978962	0.334493
FB-ADIPO	SYK-FGR	17.8995	2.8497	1.19e-07	0.000133516	5.8267	3.072	0.001393	0.786437	0.026519	0.805685	0.58	0.993964	0.906304	0.000348159	-0.0323	2.2208	0.994388	0.193996
FB-ADIPO	ERBB2-SH3BP2	18.2331	2.5075	1.28e-10	3.91e-07	7.2786	2.505	0.000495	0.643809	0.029401	0.805685	0.86	1	0.294178	0.000160782	0.3782	3.1125	0.978962	0.140335
FB-ADIPO	ERBB2-BLNK	26.468	2.5692	0	0	10.2292	2.5875	0.000204	0.562555	0.029401	0.805685	0.42	0.887979	0.294178	1.09e-05	0.3782	4.5012	0.978962	0.0516841
FB-ADIPO	SRC-MAP4K1	11.6201	2.0513	1.64e-06	0.00121453	6.2703	1.8532	0.000772	0.682042	0.026519	0.805685	0.54	0.967114	0.0868651	0.00084603	0.4189	1.6902	0.963808	0.286994
FB-ADIPO	ABL1-SH3BP1	21.7242	3.7646	7.49e-07	0.000623698	5.6211	3.8648	0.006831	0.912738	0.026519	0.805685	0.86	1	0.118404	0.000526592	0.3916	2.275	0.963808	0.232761
FB-ADIPO	EIF2AK2-CASP7	25.9581	4.917	2.15e-05	0.0104381	4.8147	5.3915	0.015313	0.912738	0.029401	0.805685	0.82	1	0.935	0.00092649	-0.0255	3.1867	0.996377	0.297225
FB-ADIPO	KAT2B-CIITA	35.5899	6.7318	1.71e-06	0.00126113	5.1612	6.8957	0.008698	0.912738	0.029401	0.805685	1	1	0.122452	0.00126715	0.571	3.2552	0.963808	0.342557
FB-ADIPO	ATM-WDHD1	21.6735	3.4253	9.77e-07	0.00078095	6.6849	3.2421	0.003499	0.912738	0.029401	0.805685	0.86	1	0.526941	0.000342285	0.1793	2.5736	0.978962	0.192566
FB-ADIPO	CDC42BPA-CIITA	35.6584	6.8036	6.54e-05	0.0261848	4.9674	7.1785	0.009064	0.912738	0.029401	0.805685	1	1	0.406921	0.00126715	0.2732	3.2552	0.978962	0.342557
FB-ADIPO	CDK2-DCLK1	22.1202	2.209	0	0	9.6405	2.2945	8.1e-05	0.409393	0.029401	0.805685	0.64	1	0.446996	1.25e-05	-0.1808	4.0454	0.978962	0.053056
FB-ADIPO	CDK2-DNM1	15.2577	2.4094	1.01e-09	2.31e-06	5.8882	2.5912	0.001141	0.753715	0.026519	0.805685	0.8	1	0.446996	0.00029676	-0.1808	2.7824	0.978962	0.181309
FB-ADIPO	CDK2-MAP4K1	9.2361	1.7139	7.93e-06	0.00454911	5.5195	1.6733	0.001499	0.800881	0.026519	0.805685	0.72	1	0.446996	0.00084603	-0.1808	1.6902	0.978962	0.286994
FB-ADIPO	CSK-HCK	25.5898	4.4156	2.05e-06	0.00146956	5.5099	4.6443	0.002486	0.894351	0.026519	0.805685	1	1	0.827898	0.000523648	0.0973	3.7939	0.989023	0.232206
FB-ADIPO	CSNK1G2-DCLK1	30.0396	2.9383	0	0	9.662	3.1091	0.000102	0.443439	0.029401	0.805685	0.34	0.822069	0.47012	1.25e-05	-0.2074	4.0454	0.978962	0.053056
FB-ADIPO	CSNK2A2-COTL1	29.4402	1.8337	0	0	20.1109	1.4639	1e-06	0.302882	0.026519	0.805685	0.42	0.887979	0.448422	4.96e-07	-0.1583	3.495	0.978962	0.0104824
FB-ADIPO	EGFR-SH3BP2	37.3627	5.5668	7.33e-08	8.85e-05	6.6169	5.6465	0.000892	0.710186	0.029401	0.805685	0.3	0.789097	0.4142	0.000160782	0.543	3.1125	0.978962	0.140335
FB-ADIPO	FGFR1-FGR	24.0975	3.8057	6.97e-08	8.47e-05	6.5284	3.6912	0.001587	0.81207	0.026519	0.805685	0.56	0.979773	0.575299	0.000348159	0.1503	2.2208	0.979433	0.193996
FB-ADIPO	FYN-FGR	24.6551	3.9761	2.01e-08	2.93e-05	6.4391	3.829	0.001261	0.772101	0.026519	0.805685	1	1	0.0908627	0.000348159	0.519	2.2208	0.963808	0.193996
FB-ADIPO	GSK3B-CTNND2	33.6606	3.1258	0	0	11.6739	2.8834	0.000154	0.503996	0.029401	0.805685	1	1	0.922235	1.01e-05	-0.0215	3.1321	0.995237	0.0513697
FB-ADIPO	GSK3B-DCLK1	43.406	4.1135	0	0	10.5957	4.0966	0.000116	0.461111	0.029401	0.805685	0.32	0.807536	0.922235	1.25e-05	-0.0215	4.0454	0.995237	0.053056
FB-ADIPO	GSK3B-DNM1	29.7768	4.5998	1.31e-08	2.03e-05	6.2861	4.737	0.001278	0.772679	0.026519	0.805685	0.58	0.993964	0.922235	0.00029676	-0.0215	2.7824	0.995237	0.181309
FB-ADIPO	IGF1R-BLNK	53.0293	5.0883	0	0	10.706	4.9532	0.000622	0.647823	0.029401	0.805685	0.22	0.701829	0.322396	1.09e-05	0.3245	4.5012	0.978962	0.0516841
FB-ADIPO	IGF1R-HCK	44.8525	7.538	2.56e-06	0.00177243	5.8254	7.6994	0.002081	0.859462	0.026519	0.805685	0.06	0.384333	0.322396	0.000523648	0.3245	3.7939	0.978962	0.232206
FB-ADIPO	INSR-CD247	24.1436	4.2859	1.8e-05	0.00903373	5.3039	4.552	0.002429	0.888759	0.029401	0.805685	0.5	0.944488	0.0689652	0.000675082	0.5135	2.3573	0.963808	0.265524
FB-ADIPO	INSR-FGR	22.5676	3.5246	2.36e-07	0.000238596	6.3655	3.5453	0.001124	0.751467	0.026519	0.805685	0.66	1	0.0689652	0.000348159	0.5135	2.2208	0.963808	0.193996
FB-ADIPO	INSR-HCK	38.598	6.3193	8.77e-07	0.000712631	5.8573	6.5898	0.002121	0.863855	0.026519	0.805685	0.76	1	0.0689652	0.000523648	0.5135	3.7939	0.963808	0.232206
FB-ADIPO	INSR-MAP4K1	17.2197	3.3621	1.61e-05	0.00823848	5.5204	3.1193	0.001488	0.799917	0.026519	0.805685	0.12	0.539527	0.0689652	0.00084603	0.5135	1.6902	0.963808	0.286994
FB-ADIPO	INSR-PDGFRB	43.9442	6.2054	9.88e-07	0.000788971	6.4655	6.7968	0.000688	0.661958	0.026519	0.805685	0.96	1	0.0689652	0.000150326	0.5135	4.3154	0.963808	0.140107
FB-ADIPO	INSR-SH3BP2	31.6597	4.2868	1.53e-10	4.54e-07	7.0247	4.5069	0.000601	0.645117	0.029401	0.805685	1	1	0.0689652	0.000160782	0.5135	3.1125	0.963808	0.140335
FB-ADIPO	KIT-PDGFRB	21.4926	3.8101	2.28e-05	0.0109429	4.4501	4.8297	0.005412	0.912738	0.026519	0.805685	0.08	0.450284	0.428791	0.000150326	-0.4705	4.3154	0.978962	0.140107
FB-ADIPO	KIT-SH3BP2	15.0269	2.7594	3.88e-05	0.0170866	5.3239	2.8225	0.002468	0.892553	0.029401	0.805685	0.94	1	0.428791	0.000160782	-0.4705	3.1125	0.978962	0.140335
FB-ADIPO	LYN-HCK	35.8113	6.0874	4.04e-07	0.000376049	5.8576	6.1137	0.002408	0.887708	0.026519	0.805685	1	1	0.945317	0.000523648	0.0221	3.7939	0.997081	0.232206
FB-ADIPO	LYN-LAIR1	38.0204	7.395	2.46e-05	0.0116438	4.8285	7.8741	0.010478	0.912738	0.029401	0.805685	1	1	0.945317	0.00125973	0.0221	4.0237	0.997081	0.342374
FB-ADIPO	LYN-PDGFRB	40.5928	5.5338	1.1e-11	4.51e-08	6.0504	6.7091	0.000942	0.716415	0.026519	0.805685	0.66	1	0.945317	0.000150326	0.0221	4.3154	0.997081	0.140107
FB-ADIPO	MAPK1-RBL1	29.1442	6.2169	0.000114352	0.0409866	4.3046	6.7704	0.005206	0.912738	0.029401	0.805685	1	1	0.688446	0.00249043	0.0841	2.9878	0.981022	0.44032
FB-ADIPO	MAPK14-FGR	21.2807	3.5724	4.21e-07	0.000389168	6.4453	3.3018	0.001073	0.741438	0.026519	0.805685	0.24	0.729859	0.0474511	0.000348159	0.4539	2.2208	0.963808	0.193996
FB-ADIPO	MAPK8-CTNND2	28.0224	2.6873	0	0	11.8153	2.3717	0.000134	0.486732	0.029401	0.805685	1	1	0.680434	1.01e-05	0.1222	3.1321	0.981006	0.0513697
FB-ADIPO	MAPK8-DCLK1	36.1071	3.5266	0	0	10.3193	3.499	0.000108	0.452222	0.029401	0.805685	1	1	0.680434	1.25e-05	0.1222	4.0454	0.981006	0.053056
FB-ADIPO	MAPK8-DNM1	24.7086	3.8458	1.36e-08	2.1e-05	6.0891	4.0578	0.00144	0.794328	0.026519	0.805685	1	1	0.680434	0.00029676	0.1222	2.7824	0.981006	0.181309
FB-ADIPO	MAPK9-PTPN7	14.8346	2.5923	5.59e-06	0.00340551	6.3811	2.3248	0.00228	0.874161	0.026519	0.805685	0.48	0.9325	0.293093	0.000603918	0.3229	1.6758	0.978962	0.248557
FB-ADIPO	CBL-PDGFRB	39.966	5.5506	2.89e-10	8.02e-07	6.7293	5.9391	0.000526	0.643809	0.026519	0.805685	0.2	0.676998	0.955808	0.000150326	0.0113	4.3154	0.998048	0.140107
FB-ADIPO	PRKACB-ALOX5	24.7474	4.9607	9.22e-06	0.00516054	4.5847	5.3979	0.005731	0.912738	0.029401	0.805685	1	1	0.361704	0.00168264	0.2023	2.7181	0.978962	0.385188
FB-ADIPO	PRKACB-C5AR1	25.712	3.6782	1.73e-09	3.65e-06	6.7726	3.7964	0.000545	0.643809	0.029401	0.805685	0.1	0.497333	0.361704	0.000254419	0.2023	2.8409	0.978962	0.171022
FB-ADIPO	PRKACB-CIITA	29.6179	5.6099	2.42e-05	0.0115097	4.8178	6.1476	0.00924	0.912738	0.029401	0.805685	0.22	0.701829	0.361704	0.00126715	0.2023	3.2552	0.978962	0.342557
FB-ADIPO	PRKACB-DCLK1	36.6844	3.5244	0	0	10.4879	3.4978	8.6e-05	0.416766	0.029401	0.805685	0.26	0.750887	0.361704	1.25e-05	0.2023	4.0454	0.978962	0.053056
FB-ADIPO	PRKCA-GNA15	35.4051	3.6688	0	0	17.6808	2.0025	6.1e-05	0.381179	0.133333	1	0.06	0.384333	0.711997	0.000150282	0.1412	3.0585	0.981933	0.140107
FB-ADIPO	PRKCA-MAP4K1	19.4707	3.5605	5.44e-06	0.00332755	5.7621	3.3791	0.001339	0.77976	0.026519	0.805685	0.02	0.195524	0.711997	0.00084603	0.1412	1.6902	0.981933	0.286994
FB-ADIPO	PRKCB-CTNND2	20.8714	3.4471	8.2e-06	0.00468478	6.5566	3.1833	0.001575	0.810713	0.029401	0.805685	0.54	0.967114	0.575589	1.01e-05	0.6473	3.1321	0.979433	0.0513697
FB-ADIPO	PRKCB-RGS10	21.1851	3.9152	8.32e-06	0.00473942	4.6695	4.5369	0.004506	0.912738	0.026519	0.805685	0.28	0.769683	0.575589	9.41e-05	0.6473	3.1716	0.979433	0.118182
FB-ADIPO	PRKDC-CIITA	29.1071	5.6367	2.77e-05	0.0128491	4.9749	5.8508	0.010151	0.912738	0.029401	0.805685	0.54	0.967114	0.313038	0.00126715	0.2408	3.2552	0.978962	0.342557
FB-ADIPO	PRKG1-DNM1	35.2603	5.5684	4.91e-08	6.3e-05	6.0153	5.8618	0.00127	0.772587	0.026519	0.805685	0.78	1	0.48989	0.00029676	0.2818	2.7824	0.978962	0.181309
FB-ADIPO	ROCK1-KCNH2	19.0686	3.4926	8.62e-07	0.000702791	9.1362	2.0871	0.001009	0.729265	0.133333	1	1	1	0.988656	0.00233063	0.0038	1.7317	0.999318	0.427783
FB-ADIPO	RPS6KA3-ADRA1B	31.2324	5.7614	1.91e-05	0.00947907	8.62	3.6232	0.002282	0.874623	0.133333	1	0.62	1	0.248848	0.00234054	0.3728	3.017	0.973243	0.428566
FB-ADIPO	RPS6KA3-CIT	18.3186	3.5675	4.92e-05	0.0207865	5.0547	3.6241	0.002414	0.887988	0.029401	0.805685	0.3	0.789097	0.248848	0.00147126	0.3728	1.7506	0.973243	0.361485
FB-ADIPO	RPS6KA3-CTNND2	32.6732	2.9981	0	0	11.1924	2.9192	6.9e-05	0.392824	0.029401	0.805685	0.42	0.887979	0.248848	1.01e-05	0.3728	3.1321	0.973243	0.0513697
FB-ADIPO	RPS6KA3-DCLK1	42.1568	4.0799	0	0	9.8388	4.2848	7.6e-05	0.395651	0.029401	0.805685	1	1	0.248848	1.25e-05	0.3728	4.0454	0.973243	0.053056
FB-ADIPO	RPS6KA3-KCNH2	18.0099	3.1944	7.5e-06	0.00434576	9.4364	1.9086	0.000884	0.708955	0.133333	1	1	1	0.248848	0.00233063	0.3728	1.7317	0.973243	0.427783
FB-ADIPO	RPS6KA3-PTPN7	17.533	2.8954	3.28e-07	0.000316249	6.2982	2.7838	0.002404	0.887197	0.026519	0.805685	0.36	0.838242	0.248848	0.000603918	0.3728	1.6758	0.973243	0.248557
FB-ADIPO	SRC-SH3BP2	21.3565	2.9127	0	0	7.3716	2.8971	0.000452	0.642622	0.029401	0.805685	1	1	0.0868651	0.000160782	0.4189	3.1125	0.963808	0.140335
FB-ADIPO	CREBBP-CIITA	36.8805	7.2656	0.00013319	0.0462107	4.9272	7.485	0.010119	0.912738	0.029401	0.805685	1	1	0.504064	0.00126715	0.1859	3.2552	0.978962	0.342557
FB-ADIPO	MAPK3-RARG	19.2739	4.0386	0.000104696	0.0381986	5.3217	3.6217	0.011559	0.912738	0.029401	0.805685	0.74	1	0.797294	0.000507761	-0.2052	2.9885	0.986704	0.227732
FB-ADIPO	LYN-CD72	21.335	3.204	1.18e-08	1.86e-05	7.5136	2.8395	0.001117	0.750222	0.026519	0.805685	0.84	1	0.945317	0.000191196	0.0221	2.2862	0.997081	0.150188
FB-ADIPO	PRKCD-NLRC4	22.8475	3.1019	3.6e-10	9.6e-07	6.776	3.3718	0.00098	0.722795	0.029401	0.805685	1	1	0.583623	9.36e-05	-0.1335	3.0824	0.979433	0.118182
FB-ADIPO	AKT1-CTNND2	21.4951	3.4402	2.01e-08	2.93e-05	10.1381	2.1202	0.000228	0.583793	0.029401	0.805685	0.06	0.384333	0.72501	1.01e-05	0.4015	3.1321	0.981933	0.0513697
FB-ADIPO	IKZF2-IKZF1	37.211	6.0381	1.09e-06	0.000862573	6.1348	6.0656	0.007791	0.912738	0.029401	0.805685	0.12	0.539527	0.0390681	0.000488302	0.5004	4.281	0.963808	0.224498
FB-ADIPO	MAPK3-ARRB2	23.7604	4.0926	7.72e-07	0.000640523	10.4423	2.2754	0.001729	0.825628	0.133333	1	1	1	0.797294	0.000354138	-0.2052	3.6029	0.986704	0.195427
FB-ADIPO	AP2B1-ARRB2	34.9836	4.3864	0	0	12.6835	2.7582	0.000966	0.719881	0.133333	1	0.02	0.195524	0.520805	0.000354138	0.1416	3.6029	0.978962	0.195427
FB-ADIPO	EGFR-PDGFRB	51.2823	7.0733	3e-12	1.4e-08	7.4621	6.8724	0.000434	0.642622	0.026519	0.805685	0.24	0.729859	0.4142	0.000150326	0.543	4.3154	0.978962	0.140107
FB-ADIPO	RAC1-NCF2	30.7042	4.2371	4e-10	1.05e-06	7.0517	4.3542	0.000445	0.642622	0.029401	0.805685	0.7	1	0.681474	0.000120624	-0.1911	3.3994	0.981007	0.132653
FB-ADIPO	FKBP1A-TGFB1	26.929	3.7729	7e-12	3.02e-08	7.2777	3.7002	0.002418	0.887988	0.029401	0.805685	0.2	0.676998	0.209799	0.000118103	-0.4643	3.2034	0.968638	0.131471
FB-ADIPO	STK36-GLI3	16.6568	3.0055	1.13e-05	0.00609534	6.7268	2.4762	0.001146	0.75424	0.029401	0.805685	0.28	0.769683	0.0671371	0.00130585	0.7017	3.9078	0.963808	0.344881
FB-ADIPO	BCL2-NLRP1B	35.1901	5.8596	9.67e-07	0.000774451	5.8712	5.9937	0.005471	0.912738	0.029401	0.805685	1	1	0.91824	0.000395196	0.0358	3.3373	0.995165	0.205391
FB-ADIPO	BCL2L1-NLRP1B	30.3654	5.0756	3.04e-07	0.000296549	5.2952	5.7346	0.00443	0.912738	0.029401	0.805685	0.3	0.789097	0.972094	0.000395196	0.0166	3.3373	0.999242	0.205391
FB-ADIPO	RAF1-MRAS	25.2757	4.0118	9.52e-07	0.000764122	6.1076	4.1384	0.003121	0.912738	0.029401	0.805685	0.28	0.769683	0.488373	0.000415993	0.1382	2.7399	0.978962	0.210239
FB-ADIPO	DBNL-MAP4K1	10.6593	2.0712	1.91e-05	0.00947251	5.3856	1.9792	0.001696	0.822506	0.026519	0.805685	0.18	0.649903	0.429798	0.00084603	-0.3054	1.6902	0.978962	0.286994
FB-ADIPO	SYK-NFAM1	21.5061	4.256	4.74e-05	0.0201834	4.8558	4.429	0.00295	0.912738	0.026519	0.805685	0.78	1	0.906304	0.00132603	-0.0323	2.6941	0.994388	0.346339
FB-ADIPO	RALA-PLD2	28.9013	4.7068	2.83e-07	0.000279015	6.1167	4.7249	0.003455	0.912738	0.026519	0.805685	0.48	0.9325	0.898846	0.000382609	-0.0303	3.2806	0.993945	0.201516
FB-ADIPO	SMAD3-RBL1	32.4269	6.717	0.000110639	0.039947	4.226	7.6732	0.006961	0.912738	0.029401	0.805685	0.04	0.307385	0.0512542	0.00249043	0.8338	2.9878	0.963808	0.44032
FB-ADIPO	SMAD7-TGFB1	28.1213	3.9879	1.1e-09	2.48e-06	6.8907	4.0811	0.0038	0.912738	0.029401	0.805685	0.04	0.307385	0.0214935	0.000118103	-0.7457	3.2034	0.872562	0.131471
FB-ADIPO	MAP4K1-BLNK	12.9698	2.1686	4.67e-06	0.00293482	6.2989	2.0591	0.000874	0.706437	0.029401	0.805685	0.58	0.993964	0.568434	1.09e-05	-0.2855	4.5012	0.979433	0.0516841
FB-ADIPO	RRAS2-PIK3CD	33.7849	5.3026	2.51e-08	3.54e-05	6.7595	4.9981	0.003251	0.912738	0.026519	0.805685	0.46	0.917918	0.0560206	0.000218079	0.4322	3.9967	0.963808	0.159481
FB-ADIPO	RAF1-ARRB2	33.2391	4.0932	0	0	13.2827	2.5024	0.000813	0.690496	0.133333	1	0.38	0.852867	0.488373	0.000354138	0.1382	3.6029	0.978962	0.195427
FB-ADIPO	MAP3K5-ARRB2	36.2558	4.3097	0	0	12.4663	2.9083	0.001022	0.731434	0.133333	1	1	1	0.0791812	0.000354138	0.4667	3.6029	0.963808	0.195427
FB-ADIPO	MAP2K4-ARRB2	34.3949	4.1449	0	0	12.8707	2.6724	0.000928	0.715785	0.133333	1	1	1	0.535092	0.000354138	0.1634	3.6029	0.978962	0.195427
FB-ADIPO	PTPN12-PDGFRB	44.4451	5.9707	1.84e-10	5.34e-07	6.7955	6.5403	0.000509	0.643809	0.026519	0.805685	0.36	0.838242	0.580531	0.000150326	0.1395	4.3154	0.979433	0.140107
FB-ADIPO	FSTL1-TGFB1	38.4216	5.3678	1.45e-09	3.13e-06	7.1823	5.3495	0.001729	0.825628	0.029401	0.805685	0.76	1	0.505785	0.000118103	-0.1757	3.2034	0.978962	0.131471
FB-ADIPO	PIM1-PTPRO	25.9692	5.3368	0.000131336	0.0457504	4.3322	5.9945	0.007797	0.912738	0.029401	0.805685	0.4	0.869191	0.539137	0.00117538	0.3593	3.698	0.978962	0.331896
FB-ADIPO	EIF2AK2-PDGFRB	35.3463	5.1408	4.38e-09	8.11e-06	6.4663	5.4663	0.000672	0.657902	0.026519	0.805685	0.28	0.769683	0.935	0.000150326	-0.0255	4.3154	0.996377	0.140107
FB-ADIPO	ABL1-SH3BP2	29.5817	4.008	3.61e-10	9.6e-07	7.2488	4.0809	0.000474	0.643676	0.029401	0.805685	0.06	0.384333	0.118404	0.000160782	0.3916	3.1125	0.963808	0.140335
FB-ADIPO	ABL1-CTNND2	29.7486	2.7803	0	0	12.3826	2.4024	0.000171	0.520479	0.029401	0.805685	0.5	0.944488	0.118404	1.01e-05	0.3916	3.1321	0.963808	0.0513697
FB-ADIPO	SRC-SH3BP1	15.5196	2.5619	7.05e-08	8.56e-05	6.0645	2.5591	0.00523	0.912738	0.026519	0.805685	0.64	1	0.0868651	0.000526592	0.4189	2.275	0.963808	0.232761
FB-ADIPO	TGFB2-TGFB1	30.7853	4.1089	8.7e-11	2.8e-07	7.3889	4.1664	0.001315	0.776316	0.029401	0.805685	0.38	0.852867	0.309256	0.000118103	0.2874	3.2034	0.978962	0.131471
FB-ADIPO	DAXX-TGFB1	19.1186	2.6909	2.2e-09	4.5e-06	7.9783	2.3963	0.000959	0.719367	0.029401	0.805685	0.5	0.944488	0.682693	0.000118103	-0.18	3.2034	0.981007	0.131471
FB-ADIPO	ACTN1-PLD2	24.2738	4.1211	1.11e-06	0.000872517	5.2826	4.5951	0.004994	0.912738	0.026519	0.805685	0.5	0.944488	0.0684018	0.000382609	-0.7837	3.2806	0.963808	0.201516
FB-ADIPO	TXK-CCR5	16.0564	3.2225	3.04e-05	0.0139027	4.1497	3.8693	0.012708	0.912738	0.029401	0.805685	0.7	1	0.164235	0.00101983	0.9364	3.4759	0.96517	0.310768
FB-ADIPO	CASP2-CASP7	21.226	3.9621	1.98e-05	0.00974752	5.3867	3.9405	0.010077	0.912738	0.029401	0.805685	0.3	0.789097	0.290846	0.00092649	0.2338	3.1867	0.978962	0.297225
FB-ADIPO	PTK2-CCR5	38.3467	7.2191	2.72e-05	0.0126649	5.1083	7.5067	0.002653	0.908379	0.029401	0.805685	1	1	0.443198	0.00101983	0.2205	3.4759	0.978962	0.310768
FB-ADIPO	ACVR1-PLEK	26.9394	4.5122	2.37e-06	0.0016613	5.6389	4.7774	0.005194	0.912738	0.029401	0.805685	0.32	0.807536	0.779831	0.000588599	0.059	2.8262	0.985147	0.24327
FB-ADIPO	TGFBR1-PLEK	28.3186	4.8017	8.85e-07	0.000717813	5.6906	4.9764	0.005541	0.912738	0.029401	0.805685	0.34	0.822069	0.743885	0.000588599	0.1032	2.8262	0.983693	0.24327
FB-ADIPO	MAP3K8-CD40	18.2125	3.8001	8.17e-05	0.0313534	4.56	3.9939	0.003852	0.912738	0.029401	0.805685	0.2	0.676998	0.177001	0.00269459	0.472	2.2664	0.965251	0.453264
FB-ADIPO	JAK1-CCR5	36.2854	6.9793	1.97e-05	0.00969437	5.0916	7.1264	0.002591	0.903167	0.029401	0.805685	0.3	0.789097	0.313914	0.00101983	0.2098	3.4759	0.978962	0.310768
FB-ADIPO	CCN2-TGFB1	27.4622	4.3791	1.28e-06	0.000986182	6.1378	4.4742	0.002361	0.881225	0.029401	0.805685	0.26	0.750887	0.113959	0.000118103	-1.0188	3.2034	0.963808	0.131471
FB-ADIPO	FGFR1-SH3BP2	33.8184	4.579	7.86e-09	1.32e-05	7.4097	4.564	0.000358	0.629432	0.029401	0.805685	1	1	0.575299	0.000160782	0.1503	3.1125	0.979433	0.140335
FB-ADIPO	FYN-SH3BP2	34.7122	4.6998	1.1e-10	3.44e-07	7.0544	4.9206	0.000594	0.643809	0.029401	0.805685	1	1	0.0908627	0.000160782	0.519	3.1125	0.963808	0.140335
FB-ADIPO	JAK1-PDGFRB	44.8003	6.1558	2.32e-08	3.31e-05	6.7704	6.617	0.000507	0.643809	0.026519	0.805685	0.32	0.807536	0.313914	0.000150326	0.2098	4.3154	0.978962	0.140107
FB-ADIPO	JAK2-PDGFRB	39.6176	5.336	1.44e-08	2.21e-05	6.7237	5.8922	0.000531	0.643809	0.026519	0.805685	0.66	1	0.592658	0.000150326	0.1423	4.3154	0.979433	0.140107
FB-ADIPO	YES1-PDGFRB	37.9525	5.5071	2.24e-09	4.58e-06	6.1315	6.1898	0.000861	0.704395	0.026519	0.805685	0.34	0.822069	0.712093	0.000150326	0.1446	4.3154	0.981933	0.140107
FB-ADIPO	LYN-CASP7	29.8279	5.6591	1.75e-05	0.00877672	4.8722	6.122	0.013386	0.912738	0.029401	0.805685	0.9	1	0.945317	0.00092649	0.0221	3.1867	0.997081	0.297225
FB-ADIPO	LYN-PILRB2	14.8646	2.9575	4.07e-05	0.0177931	8.0294	1.8513	0.002963	0.912738	0.133333	1	0.92	1	0.945317	0.00312918	0.0221	1.571	0.997081	0.474992
FB-ADIPO	SYK-PIK3AP1	34.9759	4.6734	2e-12	9.62e-09	6.9958	4.9995	0.001158	0.755948	0.029401	0.805685	0.88	1	0.906304	9.51e-05	-0.0323	4.3393	0.994388	0.118182
FB-ADIPO	IRS2-PIK3CD	30.9016	4.8391	1.71e-08	2.55e-05	6.9097	4.4722	0.004731	0.912738	0.026519	0.805685	0.1	0.497333	0.36371	0.000218079	-0.3157	3.9967	0.978962	0.159481
FB-ADIPO	STK24-CASP7	30.5153	5.6409	5.09e-05	0.0213463	5.3717	5.6807	0.011659	0.912738	0.029401	0.805685	0.2	0.676998	0.0988866	0.00092649	0.4327	3.1867	0.963808	0.297225
FB-ADIPO	RAC1-CYBB	29.1716	5.9824	4.45e-05	0.019165	4.6599	6.2601	0.010315	0.912738	0.029401	0.805685	1	1	0.681474	0.00117265	-0.1911	3.2568	0.981007	0.331686
FB-ADIPO	CSK-LAIR1	27.1312	5.434	4.46e-05	0.0191812	4.7819	5.6737	0.012739	0.912738	0.029401	0.805685	0.86	1	0.827898	0.00125973	0.0973	4.0237	0.989023	0.342374
FB-ADIPO	CSK-CD247	15.9988	2.7791	3.03e-06	0.00205411	5.1742	3.092	0.002682	0.910175	0.029401	0.805685	0.04	0.307385	0.827898	0.000675082	0.0973	2.3573	0.989023	0.265524
FB-ADIPO	CSK-PLD2	22.0157	3.7476	1.31e-07	0.000145418	6.2299	3.5339	0.004667	0.912738	0.026519	0.805685	0.44	0.903094	0.827898	0.000382609	0.0973	3.2806	0.989023	0.201516
FB-ADIPO	FYN-CD48	37.1485	5.9413	5.06e-08	6.47e-05	6.0731	6.1169	0.000905	0.713981	0.029401	0.805685	0.36	0.838242	0.0908627	0.000417371	0.519	3.3256	0.963808	0.210435
FB-ADIPO	AP2M1-ARRB2	24.9304	4.107	4.4e-07	0.000403935	9.4481	2.6387	0.002294	0.875962	0.133333	1	0.92	1	0.734464	0.000354138	-0.268	3.6029	0.982612	0.195427
FB-ADIPO	FYN-CTNND2	34.8974	3.1045	0	0	12.0287	2.9012	9.2e-05	0.426403	0.029401	0.805685	1	1	0.0908627	1.01e-05	0.519	3.1321	0.963808	0.0513697
FB-ADIPO	LYN-CSF3R	25.905	4.6659	2.6e-05	0.012208	5.656	4.58	0.007127	0.912738	0.026519	0.805685	0.44	0.903094	0.945317	0.000847624	0.0221	2.7768	0.997081	0.286994
FB-ADIPO	SYK-CSF3R	22.0091	4.0887	1.09e-06	0.000859916	6.2041	3.5475	0.004979	0.912738	0.026519	0.805685	1	1	0.906304	0.000847624	-0.0323	2.7768	0.994388	0.286994
FB-ADIPO	JAK2-CCR5	32.0589	6.0838	5.47e-06	0.00334258	5.1841	6.184	0.002583	0.902417	0.029401	0.805685	0.44	0.903094	0.592658	0.00101983	0.1423	3.4759	0.979433	0.310768
FB-ADIPO	LCK-CTNND2	10.2868	2.1577	5.83e-05	0.0238081	10.3525	0.9937	5.3e-05	0.370728	0.029401	0.805685	0.52	0.957827	0.209663	1.01e-05	1.091	3.1321	0.968638	0.0513697
FB-ADIPO	HIPK3-ARRB2	34.3644	4.1736	1e-12	5.04e-09	11.3692	3.0226	0.00134	0.77976	0.133333	1	0.36	0.838242	0.944323	0.000354138	0.0139	3.6029	0.99705	0.195427
FB-ADIPO	BRAF-MRAS	28.4585	4.3587	6.63e-08	8.1e-05	6.1799	4.605	0.002791	0.912738	0.029401	0.805685	0.1	0.497333	0.634933	0.000415993	0.1444	2.7399	0.979796	0.210239
CM-FB	MYC-GSK3B	-58.7744	11.1291	1.62e-05	0.0082602	-5.1667	11.3757	0.008328	0.912738	0.028571	0.805685	0.18	0.649903	0.000695076	0.922235	-5.46	-0.0215	0.267714	0.995237
CM-FB	MYC-RIOX2	-34.4567	6.4364	7.74e-06	0.00445749	-4.5792	7.5246	0.007678	0.912738	0.028571	0.805685	0.1	0.497333	0.000695076	0.802128	-5.46	-0.066	0.267714	0.986794
CM-FB	SP1-GDF15	-63.5713	11.2464	1.2e-05	0.00643262	-4.2458	14.9728	0.023733	0.912738	0.028571	0.805685	0.68	1	0.410145	0.000438574	0.528	-6.8112	0.978962	0.214551
CM-FB	EP300-MYB	17.294	2.6028	7.35e-09	1.25e-05	8.8695	1.9498	0.002043	0.857196	0.028571	0.805685	1	1	0.88192	0.000151875	0.0322	1.5787	0.992496	0.140107
CM-FB	CREBBP-MYB	20.2443	2.8239	4e-12	1.82e-08	9.2011	2.2002	0.001768	0.831007	0.028571	0.805685	0.78	1	0.226881	0.000151875	0.3158	1.5787	0.97053	0.140107
CM-FB	MYB-COL1A2	18.083	3.6321	9.8e-05	0.0362762	5.3364	3.3886	0.003556	0.912738	0.026519	0.805685	1	1	0.0013296	0.542221	1.5503	-0.2116	0.34682	0.978962
CM-FB	NLK-MYB	18.5164	2.8003	8.24e-08	9.77e-05	9.34	1.9825	0.001615	0.814054	0.028571	0.805685	0.96	1	0.979067	0.000151875	0.0067	1.5787	0.999242	0.140107
CM-FB	PRLR-JAK2	25.1856	4.7176	7.8e-05	0.0302185	5.5592	4.5305	0.003607	0.912738	0.028571	0.805685	0.34	0.822069	0.00045182	0.592658	2.6281	0.1423	0.217937	0.979433
CM-FB	MYC-CDKN1A	-41.3569	7.9786	2.65e-05	0.0124052	-4.3151	9.5843	0.00555	0.912738	0.028571	0.805685	1	1	0.000695076	0.298375	-5.46	-0.7114	0.267714	0.978962
CM-FB	CDKN2D-CDK6	29.0857	6.3363	0.000145283	0.049515	4.2243	6.8854	0.005539	0.912738	0.026519	0.805685	0.36	0.838242	0.00230476	0.202165	3.0486	0.2972	0.427282	0.968325
CM-FB	MYC-CUL1	-54.0537	9.7973	1.84e-05	0.0092035	-5.178	10.4391	0.00906	0.912738	0.028571	0.805685	0.04	0.307385	0.000695076	0.999042	-5.46	-0.0003	0.267714	0.999851
CM-FB	TRAF6-MYB	14.3174	2.0901	1.08e-10	3.38e-07	8.7328	1.6395	0.002031	0.856413	0.028571	0.805685	0.52	0.957827	0.19067	0.000151875	-0.3129	1.5787	0.966017	0.140107
CM-FB	PRKD1-ABL1	24.1343	4.6109	8.55e-06	0.00484543	5.5125	4.3781	0.001676	0.819317	0.028571	0.805685	0.08	0.450284	0.00194933	0.118404	2.1842	0.3916	0.404502	0.963808
CM-FB	INCENP-AURKB	-15.3977	3.3278	6.45e-05	0.0259026	-4.5914	3.3536	0.003868	0.912738	0.028571	0.805685	0.12	0.539527	0.0270897	0.00282281	-1.2924	-2.4592	0.915915	0.461643
CM-FB	AURKB-KIF23	-21.6123	4.158	2.49e-05	0.0117907	-5.2386	4.1256	0.002428	0.888759	0.028571	0.805685	0.3	0.789097	0.00433288	0.00467021	-4.0246	-1.805	0.539026	0.551601
CM-FB	DENND4A-BRD7	-29.2989	4.0826	4.18e-10	1.08e-06	-8.8135	3.3243	0.000338	0.62751	0.028571	0.805685	0.22	0.701829	8.55e-05	0.273056	-3.0164	-0.2634	0.114168	0.97728
CM-FB	MYC-EIF4G1	-56.2431	10.1177	5.74e-06	0.00348359	-4.9956	11.2586	0.006235	0.912738	0.028571	0.805685	0.1	0.497333	0.000695076	0.592691	-5.46	-0.1142	0.267714	0.979433
CM-FB	MYC-EIF4A1	-50.834	9.4164	2.05e-05	0.0100261	-4.4754	11.3585	0.004286	0.912738	0.028571	0.805685	1	1	0.000695076	0.252884	-5.46	-0.5842	0.267714	0.973606
CM-FB	MYC-BCL2L11	-36.5271	6.8916	5.91e-05	0.0241008	-4.4172	8.2694	0.006166	0.912738	0.028571	0.805685	1	1	0.000695076	0.414498	-5.46	-0.3683	0.267714	0.978962
CM-FB	MYC-CDC25A	-33.765	6.0586	2.06e-05	0.0100686	-5.2018	6.491	0.004342	0.912738	0.028571	0.805685	0.48	0.9325	0.000695076	0.38815	-5.46	-0.2045	0.267714	0.978962
CM-FB	MYC-CCND2	-51.6105	10.5227	0.000134877	0.0466885	-3.7651	13.7074	0.010962	0.912738	0.028571	0.805685	0.26	0.750887	0.000695076	0.464548	-5.46	-0.7156	0.267714	0.978962
CM-FB	MYC-CDK4	-38.1671	6.835	6.97e-06	0.00408804	-4.4805	8.5184	0.004247	0.912738	0.028571	0.805685	0.38	0.852867	0.000695076	0.254012	-5.46	-0.4773	0.267714	0.973796
CM-FB	ERN1-XBP1	-28.6704	5.9556	4.97e-05	0.0209497	-3.932	7.2915	0.018713	0.912738	0.028571	0.805685	0.42	0.887979	0.000134021	0.152352	-2.4403	-0.6681	0.135484	0.963816
CM-FB	CCND2-CDK4	-25.5307	5.2077	0.000101228	0.0372046	-3.8141	6.6938	0.008926	0.912738	0.028571	0.805685	1	1	0.0005557	0.254012	-3.2642	-0.4773	0.238718	0.973796
CM-FB	CD28-GRB2	16.4622	3.1144	1.3e-05	0.00689501	11.8126	1.3936	0.000153	0.502682	0.028571	0.805685	0.14	0.580719	0.000230699	0.570047	1.7083	0.1328	0.161124	0.979433
CM-FB	LIF-LIFR	20.4552	3.9171	4.51e-05	0.0193278	5.0457	4.054	0.008551	0.912738	0.026519	0.805685	0.7	1	0.00103111	0.697978	2.1808	0.0841	0.312097	0.981071
CM-FB	MYC-SMAD3	-50.3518	10.0198	2.33e-05	0.0111318	-4.5641	11.0321	0.013124	0.912738	0.028571	0.805685	0.74	1	0.000695076	0.0512542	-5.46	0.8338	0.267714	0.963808
CM-FB	INHBA-ACVR2B	-26.3898	4.9465	2.78e-05	0.0128866	-4.4378	5.9466	0.008315	0.912738	0.028571	0.805685	0.36	0.838242	0.000148973	0.0164916	-5.1617	0.8434	0.140107	0.821089
CM-FB	FGF2-FGFR2	23.4131	4.5224	1.79e-05	0.00896877	6.7679	3.4594	0.001137	0.75313	0.028571	0.805685	1	1	0.000169963	0.748903	2.4658	-0.1243	0.142031	0.98371
CM-FB	FGF7-FGFR2	-50.9231	8.356	7.89e-07	0.000651422	-5.7754	8.8172	0.003015	0.912738	0.028571	0.805685	0.4	0.869191	0.00026469	0.748903	-5.0906	-0.1243	0.173961	0.98371
CM-FB	ANGPT1-TEK	41.8455	7.4946	1.2e-05	0.00644536	4.5106	9.2772	0.004101	0.912738	0.028571	0.805685	0.16	0.615014	0.000928476	0.0740964	3.1352	0.655	0.29737	0.963808
CM-FB	PBK-DUSP1	16.4472	2.7254	9.39e-08	0.000109535	5.8417	2.8155	0.007212	0.912738	0.026519	0.805685	0.32	0.807536	0.000348938	0.262442	2.0819	-0.3475	0.193996	0.975196
CM-FB	MKNK1-MAPK14	-10.5523	1.3165	1e-12	5.04e-09	-5.514	1.9137	0.0015	0.800881	0.028571	0.805685	1	1	0.000536134	0.0474511	-1.6145	0.4539	0.235464	0.963808
CM-FB	MYC-SMAD2	-48.6463	9.1278	2.3e-05	0.0110201	-4.9686	9.7908	0.007552	0.912738	0.028571	0.805685	0.46	0.917918	0.000695076	0.932752	-5.46	0.018	0.267714	0.996256
CM-FB	INHBA-ACTR2	-48.6478	7.4957	6.97e-09	1.19e-05	-5.9292	8.2048	0.004363	0.912738	0.028571	0.805685	0.54	0.967114	0.000148973	0.828292	-5.1617	0.0493	0.140107	0.989084
CM-FB	PTPRT-STAT3	-67.4197	5.1194	0	0	-12.2282	5.5135	0.000376	0.629432	0.028571	0.805685	0.56	0.979773	1.32e-06	0.598977	-6.9411	0.0971	0.018135	0.979433
CM-FB	GRK6-LRP6	21.6866	4.5614	0.000116649	0.0416196	5.2162	4.1576	0.003078	0.912738	0.028571	0.805685	1	1	0.00142858	0.697521	2.1015	0.0865	0.35836	0.981037
CM-FB	INHBA-ACVR2A	-45.5494	6.7094	1.61e-08	2.42e-05	-6.1197	7.443	0.005651	0.912738	0.028571	0.805685	1	1	0.000148973	0.73285	-5.1617	0.0857	0.140107	0.982594
CM-FB	INHBA-ACVR1B	-38.0523	5.914	1.12e-07	0.000126863	-6.2025	6.135	0.005127	0.912738	0.028571	0.805685	0.34	0.822069	0.000148973	0.354066	-5.1617	0.1964	0.140107	0.978962
CM-FB	INHA-ACVR2B	13.652	2.752	1.57e-05	0.00806485	5.6507	2.416	0.008375	0.912738	0.028571	0.805685	0.7	1	0.00666466	0.0164916	1.1284	0.8434	0.621925	0.821089
CM-FB	LIF-IL6ST	22.7339	4.3097	2.65e-05	0.0123991	5.1107	4.4483	0.009576	0.912738	0.026519	0.805685	0.94	1	0.00103111	0.807146	2.1808	0.0725	0.312097	0.987759
CM-FB	OSTN-NPR3	-80.9265	11.326	3.91e-09	7.34e-06	-4.311	18.772	0.022974	0.912738	0.028571	0.805685	0.08	0.450284	1.23e-09	0.639562	-9.7863	-0.7876	0.000150726	0.980026
CM-FB	ARHGEF2-RAC1	-33.6943	5.8349	9.89e-07	0.000789691	-5.134	6.563	0.003018	0.912738	0.028571	0.805685	0.64	1	4.71e-05	0.681474	-3.486	-0.1911	0.0826169	0.981007
CM-FB	ARHGEF2-ARHGAP1	-27.5678	4.6793	1.71e-08	2.55e-05	-6.1446	4.4865	0.001956	0.848666	0.028571	0.805685	0.38	0.852867	4.71e-05	0.484887	-3.486	-0.2559	0.0826169	0.978962
CM-FB	DUSP10-MAPK14	18.4764	3.2823	3.34e-05	0.0150373	11.2645	1.6402	0.000116	0.461111	0.028571	0.805685	0.68	1	0.000966377	0.0474511	1.5324	0.4539	0.302341	0.963808
CM-FB	BIK-BCL2	22.2114	4.4302	4.96e-05	0.0209129	5.1449	4.3172	0.002213	0.869826	0.028571	0.805685	0.04	0.307385	0.000188707	0.91824	2.0777	0.0358	0.149515	0.995165
CM-FB	GDF15-ERBB2	-39.7536	4.6052	0	0	-9.5881	4.1461	0.002356	0.88073	0.028571	0.805685	0.56	0.979773	1.55e-05	0.294178	-7.3819	0.3782	0.0580768	0.978962
CM-FB	SESN2-SQSTM1	-45.7208	4.6903	0	0	-7.8029	5.8595	0.000693	0.66424	0.028571	0.805685	0.22	0.701829	1.79e-06	0.500551	-4.7975	-0.2779	0.0224053	0.978962
CM-FB	NOD1-MAPK14	26.5075	5.2193	2.76e-05	0.0128138	6.3684	4.1623	0.004419	0.912738	0.028571	0.805685	1	1	0.000390664	0.0474511	2.4409	0.4539	0.204194	0.963808
CM-FB	NOD1-MAPK8	22.5242	4.3549	1.72e-05	0.00866156	4.5985	4.8982	0.017735	0.912738	0.028571	0.805685	1	1	0.000390664	0.680434	2.4409	0.1222	0.204194	0.981006
CM-FB	NOD1-RIPK2	21.7598	3.6886	1.04e-06	0.000824165	6.0709	3.5843	0.003557	0.912738	0.028571	0.805685	1	1	0.000390664	0.213476	2.4409	0.279	0.204194	0.96914
CM-FB	NOD1-IKBKB	21.2945	3.7174	1.27e-06	0.00097816	5.5917	3.8083	0.010131	0.912738	0.028571	0.805685	0.7	1	0.000390664	0.557067	2.4409	0.1238	0.204194	0.979433
CM-FB	PBK-DLG1	22.7789	3.6395	9.86e-07	0.000787677	6.6125	3.4448	0.004526	0.912738	0.026519	0.805685	0.9	1	0.000348938	0.581844	2.0819	0.1791	0.193996	0.979433
CM-FB	TSSK4-CREB1	16.4925	2.6005	4.56e-07	0.000415501	7.7024	2.1412	0.002402	0.886885	0.028571	0.805685	1	1	0.000307964	0.544149	1.7204	0.123	0.185678	0.978962
CM-FB	RASGEF1A-NRAS	-35.8807	3.7929	0	0	-9.376	3.8269	0.000255	0.608227	0.028571	0.805685	0.2	0.676998	2.19e-05	0.0806718	-3.9458	-0.3982	0.0632914	0.963808
CM-FB	DEPTOR-MTOR	-18.6176	3.8289	8.32e-05	0.0318055	-6.1593	3.0227	0.003942	0.912738	0.028571	0.805685	1	1	0.000115695	0.455568	-2.4348	0.2038	0.131439	0.978962
CM-FB	JDP2-ATF2	-25.3767	5.5581	0.000130325	0.0454825	-4.6508	5.4564	0.006716	0.912738	0.028571	0.805685	0.52	0.957827	0.000803828	0.454072	-2.8196	0.2108	0.281901	0.978962
CM-FB	ARAP2-CDC42	19.2575	3.7797	1.28e-05	0.00679969	5.4619	3.5258	0.001571	0.809793	0.028571	0.805685	1	1	0.000289205	0.91043	1.8903	-0.0246	0.179411	0.994645
CM-FB	RND1-MAPK8	-35.4565	5.2177	2.38e-08	3.39e-05	-6.6037	5.3692	0.005028	0.912738	0.028571	0.805685	0.1	0.497333	0.000127852	0.680434	-4.0654	0.1222	0.133964	0.981006
CM-FB	ARHGEF2-RHOA	-36.7109	5.5606	1.02e-08	1.66e-05	-6.8797	5.3362	0.000587	0.643809	0.028571	0.805685	0.4	0.869191	4.71e-05	0.743639	-3.486	-0.1077	0.0826169	0.983626
CM-FB	PBK-GPSM2	15.1682	2.5595	1.7e-05	0.00860183	7.173	2.1146	0.003233	0.912738	0.026519	0.805685	0.28	0.769683	0.000348938	0.475774	2.0819	0.2591	0.193996	0.978962
CM-FB	ARHGEF17-RHOA	38.3726	6.7053	2.33e-06	0.00163986	6.1311	6.2587	0.006879	0.912738	0.028571	0.805685	0.26	0.750887	0.000399574	0.743639	3.7956	-0.1077	0.206108	0.983626
CM-FB	TRIB3-AKT1	-64.9544	10.3326	8.73e-07	0.000709831	-4.1931	15.4909	0.013954	0.912738	0.029401	0.805685	0.62	1	2.69e-06	0.72501	-9.9775	0.4015	0.0254785	0.981933
CM-FB	WNK3-SLC12A4	-14.6563	2.789	9.81e-06	0.00544169	-4.7676	3.0742	0.007085	0.912738	0.028571	0.805685	0.1	0.497333	0.000424653	0.83561	-1.8208	-0.0508	0.21205	0.989674
CM-FB	INCENP-AURKA	-12.8617	2.7152	4.46e-05	0.0191661	-4.4024	2.9215	0.014789	0.912738	0.028571	0.805685	0.58	0.993964	0.0270897	0.00445218	-1.2924	-2.0727	0.915915	0.543296
CM-FB	NOD1-ATG16L1	22.0888	3.9898	1.36e-06	0.00103449	5.4028	4.0884	0.008459	0.912738	0.028571	0.805685	1	1	0.000390664	0.413694	2.4409	0.202	0.204194	0.978962
CM-FB	PRKD1-SRC	18.5988	3.7863	6.41e-05	0.0257746	7.5927	2.4496	0.000395	0.633106	0.028571	0.805685	0.38	0.852867	0.00194933	0.0868651	2.1842	0.4189	0.404502	0.963808
CM-FB	MAF-MYB	13.1614	2.0863	1.61e-07	0.00017341	6.7923	1.9377	0.00571	0.912738	0.028571	0.805685	0.8	1	0.536524	0.000151875	-0.3877	1.5787	0.978962	0.140107
CM-FB	CSNK2A2-AQP4	22.7227	3.8161	5.52e-06	0.00336927	6.0075	3.7824	0.001265	0.772292	0.026519	0.805685	0.1	0.497333	0.132941	0.000334854	-0.3486	2.2671	0.963808	0.190969
CM-FB	HDAC4-MEF2D	15.754	3.1607	5.16e-05	0.0215766	8.2666	1.9057	0.000632	0.649225	0.028571	0.805685	1	1	0.000248293	0.681708	1.6519	0.0746	0.169866	0.981007
CM-FB	PTPRT-PXN	-54.9088	5.1437	0	0	-13.0737	4.1999	0.000256	0.608227	0.028571	0.805685	1	1	1.32e-06	0.209982	-6.9411	0.3414	0.018135	0.968638
CM-FB	WNT11-MUSK	26.4732	4.8607	2.6e-05	0.0122267	4.7663	5.5543	0.011051	0.912738	0.029401	0.805685	0.02	0.195524	0.000777545	0.812696	4.7408	0.1034	0.278573	0.988036
CM-FB	KIF5C-TRAK2	-14.0207	2.8851	8.25e-05	0.0316108	-5.1832	2.705	0.003489	0.912738	0.028571	0.805685	1	1	0.000538885	0.276758	-1.8916	0.2745	0.235835	0.977936
CM-FB	MYC-BRD4	-55.1195	10.5025	4.12e-05	0.0179657	-5.1216	10.7622	0.009315	0.912738	0.028571	0.805685	0.98	1	0.000695076	0.563717	-5.46	0.1449	0.267714	0.979433
CM-FB	WNT11-FZD7	25.8897	5.4235	3.87e-05	0.0170402	4.2739	6.0577	0.014358	0.912738	0.029401	0.805685	1	1	0.000777545	0.199382	4.7408	-0.4967	0.278573	0.967338
CM-FB	WNT11-LRP6	47.7694	8.5177	6.44e-06	0.00383709	5.0141	9.5269	0.013084	0.912738	0.029401	0.805685	1	1	0.000777545	0.697521	4.7408	0.0865	0.278573	0.981037
CM-FB	WNT11-FZD3	23.591	4.4511	2.3e-05	0.0110519	4.5188	5.2206	0.012755	0.912738	0.029401	0.805685	1	1	0.000777545	0.652802	4.7408	0.1642	0.278573	0.980425
CM-FB	MYC-DNMT3A	-49.4485	9.7175	4.78e-05	0.0203213	-4.7632	10.3815	0.011352	0.912738	0.028571	0.805685	0.4	0.869191	0.000695076	0.298851	-5.46	0.2619	0.267714	0.978962
CM-FB	TIAM1-SRC	12.5262	2.4867	2.15e-05	0.0104205	14.2477	0.8792	1.2e-05	0.302882	0.028571	0.805685	0.54	0.967114	0.000727396	0.0868651	1.3294	0.4189	0.271758	0.963808
CM-FB	NCL-MYB	14.2532	2.3004	6.11e-07	0.00052825	7.0235	2.0294	0.004463	0.912738	0.028571	0.805685	0.8	1	0.322263	0.000151875	-0.7449	1.5787	0.978962	0.140107
CM-FB	EDNRA-GNAS	-25.3918	5.2096	8.64e-05	0.0327683	-8.1253	3.125	0.000658	0.654503	0.028571	0.805685	1	1	0.000318025	0.295879	-1.8823	-0.3446	0.187307	0.978962
CM-FB	MAPK3-MYB	8.6848	1.6353	1.29e-06	0.0009896	4.128	2.1039	0.025773	0.912738	0.029401	0.805685	0.84	1	0.0135865	0.000151875	3.6799	1.5787	0.783685	0.140107
CM-FB	MAPK1-MYB	17.7359	2.5123	5.01e-09	9.08e-06	9.2351	1.9205	0.001685	0.82128	0.028571	0.805685	1	1	0.742225	0.000151875	0.0716	1.5787	0.983507	0.140107
CM-FB	LONP1-STAR	-27.2303	5.0903	1.66e-05	0.00843622	-7.6707	3.5499	0.002417	0.887988	0.028571	0.805685	0.98	1	0.000794504	0.0666949	-3.7559	-1.0567	0.281901	0.963808
CM-FB	BRCA2-POLH	-18.0459	2.8307	3.49e-08	4.69e-05	-6.9349	2.6022	0.001288	0.773118	0.028571	0.805685	0.84	1	6.04e-06	0.816347	-2.8445	0.0593	0.0368424	0.988433
CM-FB	CSNK2A1-MYB	18.1448	2.6148	7.34e-09	1.25e-05	9.3468	1.9413	0.001631	0.814054	0.028571	0.805685	1	1	0.9383	0.000151875	0.0158	1.5787	0.99642	0.140107
CM-FB	RASGEF1A-KRAS	-37.5217	4.2122	0	0	-8.983	4.177	0.000383	0.632642	0.028571	0.805685	1	1	2.19e-05	0.987363	-3.9458	-0.0033	0.0632914	0.999318
CM-FB	PAK1-AURKA	-12.701	2.8405	6.98e-05	0.0275909	-3.9195	3.2405	0.014329	0.912738	0.028571	0.805685	1	1	0.0363616	0.00445218	-1.4786	-2.0727	0.963808	0.543296
CM-FB	PRKD1-DLC1	35.7988	7.3694	8.39e-05	0.0320013	5.1288	6.98	0.002437	0.889849	0.028571	0.805685	0.4	0.869191	0.00194933	0.142618	2.1842	0.6879	0.404502	0.963808
CM-FB	EPHA4-EFNB3	47.3906	9.5877	9.75e-05	0.0361349	4.7395	9.999	0.006636	0.912738	0.026519	0.805685	0.48	0.9325	0.0206735	0.00216064	1.2646	3.7169	0.866347	0.418331
CM-FB	ITGB6-SRC	16.1522	3.4313	0.000103292	0.0377994	7.4588	2.1655	0.000333	0.62751	0.028571	0.805685	1	1	0.00107772	0.0868651	1.6563	0.4189	0.317988	0.963808
CM-FB	EPHB4-EFNB3	32.4642	6.7176	0.000105599	0.0384642	4.3679	7.4325	0.005261	0.912738	0.026519	0.805685	0.32	0.807536	0.0301518	0.00216064	2.1324	3.7169	0.93614	0.418331
CM-FB	INHBA-ACVR1	-48.658	7.0253	5e-12	2.22e-08	-6.3755	7.632	0.005476	0.912738	0.028571	0.805685	0.06	0.384333	0.000148973	0.779831	-5.1617	0.059	0.140107	0.985147
CM-FB	INHBA-ENG	-53.7585	8.0138	1.1e-09	2.48e-06	-5.4033	9.9491	0.002133	0.864263	0.028571	0.805685	1	1	0.000148973	0.332647	-5.1617	-0.5072	0.140107	0.978962
CM-FB	INHBA-SMAD3	-46.2725	7.9716	8.8e-06	0.00496386	-5.4888	8.4304	0.009519	0.912738	0.028571	0.805685	0.72	1	0.000148973	0.0512542	-5.1617	0.8338	0.140107	0.963808
CM-FB	INHBA-BAMBI	-36.7653	5.974	6.96e-07	0.000588269	-4.9926	7.364	0.002915	0.912738	0.028571	0.805685	0.22	0.701829	0.000148973	0.0496984	-5.1617	-1.4099	0.140107	0.963808
CM-FB	GDF15-RET	-58.6325	6.187	0	0	-7.6063	7.7084	0.00466	0.912738	0.028571	0.805685	1	1	1.55e-05	0.115908	-7.3819	0.5777	0.0580768	0.963808
CM-FB	FGF2-FGFR1	27.71	4.2632	3.74e-07	0.000353138	8.6106	3.2181	0.00047	0.643676	0.028571	0.805685	1	1	0.000169963	0.575299	2.4658	0.1503	0.142031	0.979433
CM-FB	FGF2-GPC4	23.64	4.5913	1.45e-05	0.00753537	5.8172	4.0638	0.00117	0.759418	0.028571	0.805685	0.84	1	0.000169963	0.055152	2.4658	0.5361	0.142031	0.963808
CM-FB	FGF2-SDC2	30.7181	4.542	1.58e-09	3.39e-06	6.4974	4.7278	0.00065	0.651454	0.028571	0.805685	0.94	1	0.000169963	0.486012	2.4658	0.2071	0.142031	0.978962
CM-FB	FGF2-NRP1	30.1878	4.9431	3.85e-07	0.000361224	5.0391	5.9907	0.002908	0.912738	0.028571	0.805685	0.2	0.676998	0.000169963	0.470445	2.4658	0.2758	0.142031	0.978962
CM-FB	EGF-NRP1	26.8502	4.8144	1.01e-06	0.000803888	4.5476	5.9042	0.012088	0.912738	0.028571	0.805685	1	1	0.000123852	0.470445	2.1307	0.2758	0.132683	0.978962
CM-FB	EGF-AXL	26.0389	4.115	3.74e-09	7.1e-06	9.5391	2.7297	0.00012	0.467427	0.028571	0.805685	0.6	1	0.000123852	0.292888	2.1307	0.2808	0.132683	0.978962
CM-FB	FGF7-FGFR1	-53.3989	8.9719	2.45e-06	0.00171306	-5.6324	9.4807	0.00878	0.912738	0.028571	0.805685	0.1	0.497333	0.00026469	0.575299	-5.0906	0.1503	0.173961	0.979433
CM-FB	BMP3-ACVR2B	13.576	2.4844	2.68e-06	0.00184355	7.0044	1.9382	0.002674	0.909427	0.029401	0.805685	0.4	0.869191	0.000415164	0.0164916	2.0221	0.8434	0.210239	0.821089
CM-FB	BMP3-BMPR2	21.8827	3.8375	1.49e-06	0.00111748	6.5152	3.3587	0.003496	0.912738	0.029401	0.805685	0.08	0.450284	0.000415164	0.812712	2.0221	-0.0501	0.210239	0.988036
CM-FB	BMP3-BMPR1A	20.5548	3.5195	1.82e-07	0.000192122	6.5079	3.1584	0.003964	0.912738	0.029401	0.805685	0.42	0.887979	0.000415164	0.984147	2.0221	-0.0038	0.210239	0.999242
CM-FB	FGF14-FGFR2	27.6976	5.4507	8.39e-05	0.0320266	6.8046	4.0704	0.000534	0.643809	0.028571	0.805685	1	1	9.45e-06	0.748903	2.9686	-0.1243	0.0490427	0.98371
CM-FB	FGF14-FGFR1	33.9809	4.6109	5.71e-09	1.01e-05	10.4681	3.2461	4.5e-05	0.351401	0.028571	0.805685	1	1	9.45e-06	0.575299	2.9686	0.1503	0.0490427	0.979433
CM-FB	CCN1-ITGB3	17.5614	3.5972	7.89e-05	0.0305057	5.5515	3.1634	0.001997	0.851748	0.028571	0.805685	0.08	0.450284	0.000196179	0.2943	2.2315	0.3431	0.151081	0.978962
CM-FB	LGALS8-ITGA3	-22.3161	4.4821	4.72e-05	0.0200896	-4.773	4.6755	0.003331	0.912738	0.028571	0.805685	0.02	0.195524	0.0259467	0.0026591	-0.59	-1.8037	0.911028	0.452758
CM-FB	LAMC2-ITGA3	-19.3495	3.6077	4.59e-06	0.00288697	-4.794	4.0362	0.003061	0.912738	0.028571	0.805685	0.26	0.750887	0.0137579	0.0026591	-1.4355	-1.8037	0.786536	0.452758
CM-FB	INHBA-TGFBR3	-60.1024	9.0046	3.22e-08	4.38e-05	-6.6028	9.1025	0.004481	0.912738	0.028571	0.805685	1	1	0.000148973	0.667384	-5.1617	0.1386	0.140107	0.980642
CM-FB	CCN1-ITGAV	21.4448	3.65	1.58e-07	0.000170409	7.1916	2.9819	0.000369	0.629432	0.028571	0.805685	0.76	1	0.000196179	0.960919	2.2315	0.0092	0.151081	0.998363
CM-FB	FGF7-NRP1	-55.9034	9.3673	6.07e-07	0.000525664	-5.1114	10.937	0.004267	0.912738	0.028571	0.805685	0.16	0.615014	0.00026469	0.470445	-5.0906	0.2758	0.173961	0.978962
CM-FB	CCN1-ITGB5	22.6857	4.1632	2.77e-05	0.0128674	10.2328	2.217	5.1e-05	0.364562	0.028571	0.805685	0.42	0.887979	0.000196179	0.912038	2.2315	-0.0274	0.151081	0.99493
CM-FB	RTN4-RTN4RL1	-15.0099	1.9703	2.3e-09	4.68e-06	-5.6997	2.6335	0.006579	0.912738	0.028571	0.805685	1	1	0.0015991	0.264606	-2.479	0.2503	0.379331	0.975582
CM-FB	CCN1-TLR4	25.0552	4.0018	5.97e-08	7.42e-05	6.8919	3.6354	0.000998	0.726318	0.028571	0.805685	0.66	1	0.000196179	0.107643	2.2315	0.5406	0.151081	0.963808
CM-FB	GDF15-TGFBR2	-74.6839	7.6604	0	0	-9.2835	8.0448	0.002597	0.90351	0.028571	0.805685	1	1	1.55e-05	0.843443	-7.3819	-0.0497	0.0580768	0.989911
CM-FB	WNT11-FZD4	38.754	7.4223	1.65e-05	0.00839638	4.7897	8.0911	0.010728	0.912738	0.029401	0.805685	0.24	0.729859	0.000777545	0.914317	4.7408	0.0654	0.278573	0.995165
CM-FB	CCN4-ITGA5	-24.8721	3.8389	1.53e-07	0.000166007	-8.4973	2.9271	0.000399	0.634273	0.028571	0.805685	0.38	0.852867	0.000133505	0.392001	-2.5962	-0.2338	0.135484	0.978962
CM-FB	CCN4-ITGB1	-28.664	5.3691	1.87e-05	0.00928769	-4.2189	6.7942	0.011563	0.912738	0.028571	0.805685	1	1	0.000133505	0.914133	-2.5962	-0.0552	0.135484	0.995165
CM-FB	SLITRK6-PTPRS	23.2189	4.4347	9.14e-06	0.00512341	5.2695	4.4063	0.00863	0.912738	0.026519	0.805685	0.1	0.497333	0.000674901	0.188606	2.7506	-0.2953	0.265524	0.96538
CM-FB	BMP3-ACVR1	19.3013	3.2418	2.05e-06	0.00147158	6.4688	2.9838	0.00391	0.912738	0.029401	0.805685	0.36	0.838242	0.000415164	0.779831	2.0221	0.059	0.210239	0.985147
CM-FB	BMP3-ACVR2A	18.2366	3.1023	5.1e-07	0.000455269	6.5443	2.7866	0.003525	0.912738	0.029401	0.805685	0.32	0.807536	0.000415164	0.73285	2.0221	0.0857	0.210239	0.982594
CM-FB	FGF2-ITGAV	23.6717	3.6346	2.18e-08	3.13e-05	6.6875	3.5397	0.000588	0.643809	0.028571	0.805685	0.1	0.497333	0.000169963	0.960919	2.4658	0.0092	0.142031	0.998363
CM-FB	FGF2-ITGB3	18.5511	3.3313	4.71e-06	0.0029488	5.0887	3.6455	0.002272	0.874161	0.028571	0.805685	0.1	0.497333	0.000169963	0.2943	2.4658	0.3431	0.142031	0.978962
CM-FB	BMP3-ACVR1B	15.6034	2.5735	3.18e-06	0.00213897	6.4383	2.4235	0.00444	0.912738	0.029401	0.805685	0.34	0.822069	0.000415164	0.354066	2.0221	0.1964	0.210239	0.978962
CM-FB	IGSF1-ACVR1B	37.6249	6.2022	2.64e-08	3.7e-05	5.7516	6.5417	0.002795	0.912738	0.026519	0.805685	0.08	0.450284	0.000428072	0.354066	4.8488	0.1964	0.21205	0.978962
CM-FB	SEMA6C-PLXNA1	35.6231	5.8871	2.63e-06	0.00181372	5.7932	6.1492	0.001508	0.801688	0.029401	0.805685	0.04	0.307385	0.000221559	0.647754	5.4747	-0.2076	0.15975	0.980293
CM-FB	MET-ITGA3	-25.0621	4.2018	1.95e-07	0.000203945	-5.4019	4.6395	0.002271	0.874161	0.028571	0.805685	0.88	1	0.00236671	0.0026591	-1.7275	-1.8037	0.429778	0.452758
CM-FB	PLXNB1-ERBB2	18.0333	3.3965	1.31e-05	0.00694283	4.7819	3.7712	0.00351	0.912738	0.028571	0.805685	0.94	1	6.84e-05	0.294178	2.6675	0.3782	0.100405	0.978962
CM-FB	FGF2-THBS2	24.6631	4.195	1.83e-06	0.00133457	7.9464	3.1037	0.000755	0.67719	0.028571	0.805685	1	1	0.000169963	0.259287	2.4658	0.4463	0.142031	0.97482
CM-FB	DBH-ADRA1A	33.6565	5.5	3.35e-07	0.000322014	9.2031	3.6571	0.002398	0.886472	0.028571	0.805685	0.6	1	1.56e-07	0.109882	5.2672	2.4784	0.00477958	0.963808
CM-FB	DBH-GPR161	33.896	1.971	0	0	20.8831	1.6231	1.8e-05	0.302882	0.028571	0.805685	0.14	0.580719	1.56e-07	0.37034	5.2672	0.1969	0.00477958	0.978962
CM-FB	PRKD1-REM1	24.6815	5.0532	0.000111987	0.0403277	7.916	3.1179	0.000473	0.643676	0.028571	0.805685	0.72	1	0.00194933	0.0752782	2.1842	0.661	0.404502	0.963808
CM-FB	PRKD1-TLR4	24.5807	5.2036	3.92e-05	0.0172379	4.1592	5.91	0.01367	0.912738	0.028571	0.805685	0.12	0.539527	0.00194933	0.107643	2.1842	0.5406	0.404502	0.963808
CM-FB	PRKCA-AQP4	30.6525	4.8357	1.34e-07	0.000148043	6.6674	4.5974	0.000772	0.682042	0.026519	0.805685	0.22	0.701829	0.0436018	0.000334854	0.7065	2.2671	0.963808	0.190969
CM-FB	MAPK8-SARM1	23.8128	3.8052	1.29e-06	0.000988523	6.2751	3.7948	0.003687	0.912738	0.026519	0.805685	0.14	0.580719	0.80445	0.000319839	0.0507	2.1716	0.98719	0.187307
CM-FB	PBK-ULK1	14.1504	2.3631	1.45e-06	0.00109755	6.5957	2.1454	0.004818	0.912738	0.026519	0.805685	0.02	0.195524	0.000348938	0.291326	2.0819	-0.2553	0.193996	0.978962
CM-FB	PRKACA-AQP4	23.4657	3.7906	3.61e-07	0.000342992	6.2595	3.7488	0.001212	0.764432	0.026519	0.805685	0.06	0.384333	0.0312601	0.000334854	0.7813	2.2671	0.940291	0.190969
CM-FB	PTPRT-CTNND1	-69.5349	5.3994	0	0	-12.1793	5.7093	0.000262	0.609304	0.028571	0.805685	0.68	1	1.32e-06	0.635366	-6.9411	0.1092	0.018135	0.979796
CM-FB	ZDHHC2-NDE1	-18.6709	3.2413	2.07e-06	0.00147967	-5.9201	3.1538	0.001328	0.776788	0.028571	0.805685	0.42	0.887979	0.000166056	0.854089	-2.4971	-0.0399	0.140474	0.989911
CM-FB	ZDHHC2-NDEL1	-22.4589	3.9565	1.08e-07	0.00012359	-6.4334	3.491	0.000681	0.660235	0.028571	0.805685	1	1	0.000166056	0.629683	-2.4971	0.0999	0.140474	0.979796
CM-FB	CDK1-MYB	2.9673	0.5613	6.6e-06	0.00391166	4.2215	0.7029	0.024298	0.912738	0.026519	0.805685	1	1	0.00363007	0.000151875	1.6017	1.5787	0.504593	0.140107
CM-FB	CDK2-MYB	9.5811	1.4463	1.92e-07	0.000201264	6.2287	1.5382	0.007517	0.912738	0.028571	0.805685	0.84	1	0.595381	0.000151875	0.222	1.5787	0.979433	0.140107
CM-FB	CSNK1E-MYB	12.1347	1.8064	2.54e-08	3.58e-05	6.0346	2.0109	0.008019	0.912738	0.028571	0.805685	1	1	0.329524	0.000151875	0.5461	1.5787	0.978962	0.140107
CM-FB	CSNK2A2-MYB	15.8401	2.3391	8.96e-09	1.47e-05	9.0022	1.7596	0.001788	0.831973	0.028571	0.805685	1	1	0.132941	0.000151875	-0.3486	1.5787	0.963808	0.140107
CM-FB	GSK3B-MYB	19.0749	2.8163	3.55e-09	6.77e-06	8.7964	2.1685	0.001993	0.851748	0.028571	0.805685	0.42	0.887979	0.0962526	0.000151875	-0.4691	1.5787	0.963808	0.140107
CM-FB	GSK3B-SYNPO	-14.703	3.024	8.28e-05	0.0316934	-9.257	1.5883	0.001897	0.841925	0.028571	0.805685	0.12	0.539527	0.0962526	0.00122002	-0.4691	-0.8816	0.963808	0.338128
CM-FB	MAPK14-MYB	18.4021	2.6982	2.02e-08	2.94e-05	9.5272	1.9315	0.001633	0.814054	0.028571	0.805685	1	1	0.00198059	0.000151875	0.9363	1.5787	0.406035	0.140107
CM-FB	MAPK14-OTUD7B	14.3903	3.0803	8.15e-05	0.0313004	7.4045	1.9434	0.002561	0.899979	0.028571	0.805685	0.4	0.869191	0.00198059	0.0596058	0.9363	0.4932	0.406035	0.963808
CM-FB	MAPK14-RRBP1	7.5654	1.2254	2.21e-07	0.000227045	8.9793	0.8425	0.000517	0.643809	0.028571	0.805685	1	1	0.00198059	0.176216	0.9363	-0.2758	0.406035	0.965251
CM-FB	PBK-MAPK14	19.843	3.1069	1.23e-07	0.000137158	6.6075	3.0031	0.004817	0.912738	0.026519	0.805685	0.22	0.701829	0.000348938	0.0474511	2.0819	0.4539	0.193996	0.963808
CM-FB	PHKG1-PHKG2	17.5956	3.5492	1.23e-05	0.00656493	4.2611	4.1294	0.019942	0.912738	0.028571	0.805685	0.2	0.676998	0.000805414	0.319379	2.3621	0.2259	0.281901	0.978962
CM-FB	PRKDC-AQP4	25.1109	4.2035	4.39e-06	0.00278718	6.3423	3.9593	0.000909	0.714334	0.026519	0.805685	0.2	0.676998	0.70382	0.000334854	-0.0917	2.2671	0.981488	0.190969
CM-FB	PRKACA-MYB	16.2978	2.3471	9.89e-10	2.27e-06	9.3963	1.7345	0.001629	0.814054	0.028571	0.805685	0.9	1	0.0312601	0.000151875	0.7813	1.5787	0.940291	0.140107
CM-FB	ROS1-PTPN11	-32.2433	5.1741	2.82e-08	3.91e-05	-4.8202	6.6892	0.003375	0.912738	0.028571	0.805685	0.36	0.838242	0.000120045	0.448446	-4.0883	0.2758	0.132547	0.978962
CM-FB	MYC-SP1	-47.2749	8.8166	1.28e-05	0.00678646	-4.6385	10.1917	0.005654	0.912738	0.028571	0.805685	0.36	0.838242	0.000695076	0.753498	-5.46	0.0878	0.267714	0.983861
CM-FB	MTBP-MDM2	-13.3017	2.8777	9.11e-05	0.0342525	-4.9184	2.7045	0.004055	0.912738	0.028571	0.805685	0.66	1	0.000332949	0.311715	-1.8548	0.2251	0.190308	0.978962
CM-FB	SUV39H1-MECOM	53.7082	9.6304	2.36e-06	0.00166032	5.1242	10.4814	0.011881	0.912738	0.028571	0.805685	0.42	0.887979	0.000673608	0.495965	4.0515	0.2889	0.265524	0.978962
CM-FB	UBE2I-MYB	14.8534	2.2849	3.86e-07	0.000361925	8.3501	1.7788	0.002517	0.896596	0.028571	0.805685	1	1	0.559071	0.000151875	-0.1717	1.5787	0.979433	0.140107
CM-FB	TRIB3-RELA	-76.9418	6.368	0	0	-11.1666	6.8904	0.00032	0.622241	0.029401	0.805685	0.02	0.195524	2.69e-06	0.600277	-9.9775	-0.1143	0.0254785	0.979433
CM-FB	EGF-CBL	19.8318	3.3649	3.39e-08	4.57e-05	8.1759	2.4256	0.001264	0.772292	0.028571	0.805685	0.66	1	0.000123852	0.955808	2.1307	0.0113	0.132683	0.998048
CM-FB	EGF-GRB2	20.2818	3.4635	6.45e-06	0.00384331	6.6877	3.0327	0.002202	0.869356	0.028571	0.805685	1	1	0.000123852	0.570047	2.1307	0.1328	0.132683	0.979433
CM-FB	EGF-SOS1	19.739	3.5974	1.56e-06	0.00116331	5.4589	3.6159	0.007468	0.912738	0.028571	0.805685	0.4	0.869191	0.000123852	0.93711	2.1307	0.0211	0.132683	0.99642
CM-FB	EGF-PIK3R1	22.2037	4.2499	6.93e-05	0.0274121	5.4618	4.0653	0.003443	0.912738	0.028571	0.805685	0.98	1	0.000123852	0.755844	2.1307	0.0931	0.132683	0.983861
CM-FB	MKNK1-EIF4G1	-17.5361	3.3694	4.6e-05	0.019683	-5.6151	3.123	0.002235	0.872025	0.028571	0.805685	0.62	1	0.000536134	0.592691	-1.6145	-0.1142	0.235464	0.979433
CM-FB	TRIB3-ATF4	-85.1661	9.101	0	0	-6.8742	12.3892	0.001275	0.772679	0.029401	0.805685	0.44	0.903094	2.69e-06	0.360057	-9.9775	-0.7804	0.0254785	0.978962
CM-FB	RIPK4-DVL2	16.5003	3.4195	9.47e-05	0.0352868	5.2407	3.1485	0.007211	0.912738	0.026519	0.805685	1	1	0.000713996	0.839762	3.2696	0.1034	0.270386	0.989911
CM-FB	SESN2-MIOS	-36.9305	3.2133	0	0	-15.7147	2.3501	0.000478	0.643676	0.028571	0.805685	0.24	0.729859	1.79e-06	0.60425	-4.7975	0.1142	0.0224053	0.979433
CM-FB	HIPK2-MYB	19.4344	2.9258	4.33e-09	8.03e-06	9.5532	2.0343	0.001481	0.799152	0.028571	0.805685	1	1	0.568967	0.000151875	0.1337	1.5787	0.979433	0.140107
CM-FB	TRIB3-ATF5	-88.2432	7.7593	0	0	-9.4967	9.2919	7.8e-05	0.399127	0.029401	0.805685	0.56	0.979773	2.69e-06	0.421465	-9.9775	-0.3739	0.0254785	0.978962
CM-FB	ERN1-COPS5	-24.2152	3.7296	4.61e-09	8.46e-06	-5.8487	4.1402	0.008161	0.912738	0.028571	0.805685	0.28	0.769683	0.000134021	0.147472	-2.4403	-0.3479	0.135484	0.963808
CM-FB	MYC-CDKN1B	-48.0295	8.5799	4.78e-06	0.0029867	-4.9455	9.7118	0.004416	0.912738	0.028571	0.805685	0.32	0.807536	0.000695076	0.398381	-5.46	-0.206	0.267714	0.978962
CM-FB	MYC-UBTF	-45.617	8.4984	2.74e-05	0.0127218	-4.7846	9.5341	0.003693	0.912738	0.028571	0.805685	0.7	1	0.000695076	0.676497	-5.46	-0.1694	0.267714	0.980642
CM-FB	ROS1-VAV3	-46.669	6.6098	6.38e-10	1.55e-06	-8.1444	5.7302	0.000864	0.704575	0.028571	0.805685	1	1	0.000120045	0.806692	-4.0883	0.0908	0.132547	0.987697
CM-FB	ROS1-ADGRL1	-32.539	4.3611	1e-12	5.04e-09	-6.9107	4.7085	0.000465	0.643676	0.028571	0.805685	1	1	0.000120045	0.23711	-4.0883	-0.2537	0.132547	0.971385
CM-FB	TGFB2-TGFB3	-17.1645	3.5131	3.17e-05	0.0144205	-5.9278	2.8956	0.001524	0.802608	0.028571	0.805685	0.52	0.957827	0.00232003	0.123	-1.766	-0.3369	0.427783	0.963808
CM-FB	PBK-ARAF	17.6087	2.9615	1.17e-06	0.00091168	6.4708	2.7213	0.005015	0.912738	0.026519	0.805685	0.12	0.539527	0.000348938	0.47238	2.0819	-0.1859	0.193996	0.978962
CM-FB	BRCA2-SMAD3	-20.8649	4.2022	1.24e-05	0.0065936	-4.2536	4.9052	0.005362	0.912738	0.028571	0.805685	1	1	6.04e-06	0.0512542	-2.8445	0.8338	0.0368424	0.963808
CM-FB	BMP3-TGFB1	15.0752	2.812	4.76e-07	0.00043134	5.8162	2.5919	0.003443	0.912738	0.029401	0.805685	1	1	0.000415164	0.509801	2.0221	-0.3247	0.210239	0.978962
CM-FB	TSSK4-SMURF2	18.5628	2.9114	2.98e-08	4.1e-05	7.7661	2.3902	0.002481	0.89431	0.028571	0.805685	0.16	0.615014	0.000307964	0.286279	1.7204	0.3265	0.185678	0.978578
CM-FB	TSSK4-TGFBR1	17.3361	2.8643	1.4e-06	0.00106511	7.4344	2.3319	0.002952	0.912738	0.028571	0.805685	0.54	0.967114	0.000307964	0.743885	1.7204	0.1032	0.185678	0.983693
CM-FB	TRIB3-KAT5	-57.9098	5.459	0	0	-9.5997	6.0325	8.1e-05	0.409393	0.029401	0.805685	0.14	0.580719	2.69e-06	0.953857	-9.9775	0.0189	0.0254785	0.997893
CM-FB	TRIB3-GDF9	-46.3927	4.8575	0	0	-8.6247	5.3791	0.000232	0.58674	0.029401	0.805685	1	1	2.69e-06	0.488659	-9.9775	-0.2834	0.0254785	0.978962
CM-FB	PBK-TRIM37	16.7916	2.8363	2.86e-07	0.000281727	5.9733	2.8111	0.007036	0.912738	0.026519	0.805685	0.72	1	0.000348938	0.853787	2.0819	0.0523	0.193996	0.989911
CM-FB	TRIB3-GIT1	-55.023	8.0689	3.08e-07	0.000299984	-4.6044	11.95	0.010902	0.912738	0.029401	0.805685	1	1	2.69e-06	0.695045	-9.9775	0.3465	0.0254785	0.981022
CM-FB	TRIB3-SETDB1	-81.9322	6.7794	0	0	-11.3893	7.1938	0.000941	0.71615	0.029401	0.805685	0.3	0.789097	2.69e-06	0.606513	-9.9775	0.1235	0.0254785	0.979433
CM-FB	PBK-GPS2	14.7401	2.6231	7.57e-07	0.000629241	6.491	2.2708	0.004776	0.912738	0.026519	0.805685	0.98	1	0.000348938	0.0214615	2.0819	-0.9409	0.193996	0.872562
CM-FB	SOCS2-INSR	17.8535	3.9763	0.000115833	0.0413824	6.7604	2.6409	0.004088	0.912738	0.028571	0.805685	1	1	0.00223307	0.0689652	1.2122	0.5135	0.423509	0.963808
CM-FB	PBK-SMAD4	20.3215	3.2697	8.64e-07	0.000704075	6.4054	3.1726	0.005252	0.912738	0.026519	0.805685	0.12	0.539527	0.000348938	0.941493	2.0819	-0.0209	0.193996	0.996588
CM-FB	PBK-GPRASP1	18.5685	3.0512	1.31e-05	0.00694857	6.655	2.7902	0.00454	0.912738	0.026519	0.805685	0.2	0.676998	0.000348938	0.835637	2.0819	-0.0423	0.193996	0.989674
CM-FB	PBK-CEP126	12.3359	2.1761	6.38e-06	0.00380872	6.1722	1.9986	0.005596	0.912738	0.026519	0.805685	1	1	0.000348938	0.239303	2.0819	-0.3094	0.193996	0.971932
CM-FB	PRC1-RACGAP1	-15.268	2.9627	7.48e-05	0.0292351	-3.4217	4.4621	0.041631	0.912738	0.028571	0.805685	0.38	0.852867	0.00864951	0.00804186	-1.8697	-1.2594	0.675779	0.661625
CM-FB	CMTM8-EGFR	34.1002	6.8625	5.65e-05	0.0232196	4.9672	6.8651	0.003288	0.912738	0.028571	0.805685	0.66	1	9.13e-05	0.4142	2.478	0.543	0.1168	0.978962
CM-FB	MYC-BCL2	-56.9668	11.4533	7.84e-05	0.0303442	-5.2168	10.9198	0.011625	0.912738	0.028571	0.805685	1	1	0.000695076	0.91824	-5.46	0.0358	0.267714	0.995165
CM-FB	MYC-CIP2A	-24.4279	4.1165	9.98e-07	0.000796364	-7.1944	3.3954	0.000447	0.642622	0.028571	0.805685	0.04	0.307385	0.000695076	0.0281892	-5.46	-1.0695	0.267714	0.923402
CM-FB	FBXW7-MYB	20.6321	2.8569	1.02e-10	3.22e-07	9.4701	2.1787	0.001663	0.817083	0.028571	0.805685	0.5	0.944488	0.00924956	0.000151875	0.8574	1.5787	0.690867	0.140107
CM-FB	ERN1-PSEN1	-18.7231	3.9805	7.82e-05	0.0302909	-5.6845	3.2937	0.007247	0.912738	0.028571	0.805685	0.2	0.676998	0.000134021	0.195757	-2.4403	0.2815	0.135484	0.966616
CM-FB	PBK-RAF1	19.2359	3.1389	3.9e-07	0.000365332	6.5829	2.9221	0.004796	0.912738	0.026519	0.805685	1	1	0.000348938	0.488373	2.0819	0.1382	0.193996	0.978962
CM-CM	HBP1-MYC	-49.1612	10.3471	6.63e-05	0.0264909	-3.8647	12.7207	0.010978	0.912738	0.028571	0.805685	0.74	1	0.163803	0.000695076	0.9026	-5.46	0.96517	0.267714
CM-CM	TRRAP-MYC	-57.3272	10.7297	1.01e-05	0.00555994	-4.9872	11.495	0.008318	0.912738	0.028571	0.805685	0.66	1	0.578424	0.000695076	0.1577	-5.46	0.979433	0.267714
CM-CM	FBXW7-MYC	-64.1216	11.2265	3.09e-06	0.00208373	-4.6133	13.8992	0.011338	0.912738	0.028571	0.805685	1	1	0.00924956	0.000695076	0.8574	-5.46	0.690867	0.267714
CM-CM	FUBP1-MYC	-71.9781	12.7025	1.13e-05	0.00613362	-5.3131	13.5473	0.004633	0.912738	0.028571	0.805685	1	1	0.0322486	0.000695076	-0.6374	-5.46	0.945179	0.267714
CM-CM	MAP1B-DAPK1	-41.3671	5.9527	4.29e-09	7.96e-06	-7.3242	5.648	0.000335	0.62751	0.028571	0.805685	0.48	0.9325	0.000106309	0.813354	-3.3349	0.0555	0.126527	0.988079
CM-CM	DAPK1-MAP1B	-41.3671	6.0341	1.87e-07	0.000196825	-7.3242	5.648	0.000335	0.62751	0.028571	0.805685	0.68	1	0.813354	0.000106309	0.0555	-3.3349	0.988079	0.126527
CM-CM	AXIN1-MYC	-53.9179	9.9136	2.05e-05	0.0100249	-5.0319	10.7153	0.007044	0.912738	0.028571	0.805685	0.8	1	0.846316	0.000695076	-0.0402	-5.46	0.989911	0.267714
CM-CM	MYC-GSK3B	-70.0364	12.3056	1.61e-05	0.00822386	-5.0189	13.9544	0.005008	0.912738	0.028571	0.805685	0.44	0.903094	0.000695076	0.0962526	-5.46	-0.4691	0.267714	0.963808
CM-CM	GSK3B-MYC	-70.0364	12.1478	1.85e-06	0.00134458	-5.0189	13.9544	0.005008	0.912738	0.028571	0.805685	0.4	0.869191	0.0962526	0.000695076	-0.4691	-5.46	0.963808	0.267714
CM-CM	MYC-RIOX2	-55.464	9.9966	2.42e-05	0.0115104	-5.1765	10.7146	0.004585	0.912738	0.028571	0.805685	0.58	0.993964	0.000695076	0.0833655	-5.46	-0.4278	0.267714	0.963808
CM-CM	SP1-GDF15	-65.568	7.7576	0	0	-9.4197	6.9608	0.002483	0.894351	0.028571	0.805685	1	1	0.410145	1.55e-05	0.528	-7.3819	0.978962	0.0580768
CM-CM	CRADD-CASP2	19.7974	3.7604	5.34e-06	0.00327369	7.4638	2.6524	0.000564	0.643809	0.028571	0.805685	0.46	0.917918	0.00125662	0.0120915	1.247	0.8205	0.342374	0.755822
CM-CM	CREBBP-MYB	19.8417	3.9947	0.000119715	0.0424472	5.576	3.5584	0.003833	0.912738	0.026519	0.805685	0.12	0.539527	0.226881	0.0013296	0.3158	1.5503	0.97053	0.34682
CM-CM	NLK-MYB	18.1263	3.6899	0.00013943	0.0479359	5.6503	3.208	0.004607	0.912738	0.026519	0.805685	0.82	1	0.979067	0.0013296	0.0067	1.5503	0.999242	0.34682
CM-CM	COPS5-MYC	-53.8295	9.8614	6.1e-06	0.00367186	-5.1495	10.4534	0.006731	0.912738	0.028571	0.805685	0.84	1	0.471554	0.000695076	-0.1662	-5.46	0.978962	0.267714
CM-CM	SMARCB1-MYC	-53.3081	9.1297	3.56e-06	0.00234834	-5.2369	10.1792	0.005192	0.912738	0.028571	0.805685	0.78	1	0.132046	0.000695076	-0.3939	-5.46	0.963808	0.267714
CM-CM	SIRT1-SUV39H1	40.3175	7.4718	3.54e-05	0.0158123	5.1434	7.8387	0.012943	0.912738	0.028571	0.805685	0.96	1	0.852344	0.000673608	0.0403	4.0515	0.989911	0.265524
CM-CM	EIF2AK3-SLC7A1	-34.7554	4.1134	1e-12	5.04e-09	-11.0056	3.158	0.000161	0.511622	0.028571	0.805685	0.18	0.649903	0.0174264	4.37e-05	-0.723	-2.6426	0.831577	0.0795503
CM-CM	PRLR-JAK2	28.068	4.9752	2.44e-06	0.00170495	6.1152	4.5898	0.002959	0.912738	0.028571	0.805685	0.7	1	0.00045182	0.359026	2.6281	0.2861	0.217937	0.978962
CM-CM	JAK2-PRLR	28.068	5.0486	1.61e-05	0.00820865	6.1152	4.5898	0.002959	0.912738	0.028571	0.805685	0.74	1	0.359026	0.00045182	0.2861	2.6281	0.978962	0.217937
CM-CM	USP28-MYC	-66.3467	12.3146	7.13e-06	0.00416601	-4.7373	14.0053	0.006609	0.912738	0.028571	0.805685	0.28	0.769683	0.477573	0.000695076	0.1834	-5.46	0.978962	0.267714
CM-CM	ELAVL1-MYC	-60.6543	11.0359	8.22e-06	0.00469349	-4.9489	12.256	0.007669	0.912738	0.028571	0.805685	0.46	0.917918	0.7373	0.000695076	0.0711	-5.46	0.983072	0.267714
CM-CM	MAPK14-CCND2	-27.3229	4.5356	5.34e-06	0.00327651	-4.1734	6.5468	0.018506	0.912738	0.028571	0.805685	0.34	0.822069	0.00198059	0.0005557	0.9363	-3.2642	0.406035	0.238718
CM-CM	MCPH1-BRCA2	-28.1667	3.8089	3.3e-11	1.2e-07	-7.9751	3.5318	0.001082	0.743138	0.028571	0.805685	0.88	1	0.758281	6.04e-06	0.0894	-2.8445	0.984239	0.0368424
CM-CM	MYC-CUL1	-61.0695	11.0899	1.37e-06	0.00104164	-4.9254	12.3989	0.008325	0.912738	0.028571	0.805685	1	1	0.000695076	0.651538	-5.46	0.0959	0.267714	0.980425
CM-CM	SUMO1-ELF4	-29.4224	5.8489	4.75e-05	0.0202133	-3.9218	7.5022	0.009608	0.912738	0.028571	0.805685	0.68	1	0.887868	0.000736626	-0.0412	-2.6639	0.992804	0.272381
CM-CM	TRAF6-MYB	14.0277	2.8984	4.35e-05	0.0187856	5.2789	2.6573	0.003932	0.912738	0.026519	0.805685	0.96	1	0.19067	0.0013296	-0.3129	1.5503	0.966017	0.34682
CM-CM	ZBTB16-MYC	-79.5044	15.2418	2.55e-05	0.0120355	-5.6845	13.9862	0.005802	0.912738	0.028571	0.805685	1	1	0.725274	0.000695076	-0.2745	-5.46	0.981933	0.267714
CM-CM	HUWE1-MYC	-69.8318	13.1716	5.65e-07	0.000494806	-5.0496	13.8292	0.00806	0.912738	0.028571	0.805685	0.34	0.822069	0.720028	0.000695076	0.0789	-5.46	0.981933	0.267714
CM-CM	ABL1-PRKD1	28.8988	5.8579	4.6e-05	0.019671	4.6825	6.1716	0.005592	0.912738	0.028571	0.805685	0.14	0.580719	0.234271	0.00194933	0.3912	2.1842	0.971322	0.404502
CM-CM	PRKD1-ABL1	28.8988	6.0546	2.43e-05	0.0115231	4.6825	6.1716	0.005592	0.912738	0.028571	0.805685	0.18	0.649903	0.00194933	0.234271	2.1842	0.3912	0.404502	0.971322
CM-CM	AURKB-INCENP	-27.2709	5.7471	0.000129579	0.0452533	-5.1277	5.3183	0.005209	0.912738	0.028571	0.805685	0.62	1	0.00433288	0.0270897	-4.0246	-1.2924	0.539026	0.915915
CM-CM	ELAVL1-TRIB3	-111.306	9.0269	0	0	-11.3244	9.8288	0.000544	0.643809	0.029401	0.805685	1	1	0.7373	2.69e-06	0.0711	-9.9775	0.983072	0.0254785
CM-CM	DENND4A-BRD7	-34.2064	5.1088	2.29e-08	3.27e-05	-8.0819	4.2325	0.000381	0.630603	0.028571	0.805685	0.38	0.852867	8.55e-05	0.5079	-3.0164	-0.1965	0.114168	0.978962
CM-CM	MYC-EIF4G1	-62.6285	11.9811	4.06e-05	0.0177518	-5.0627	12.3705	0.009263	0.912738	0.028571	0.805685	1	1	0.000695076	0.794108	-5.46	-0.0801	0.267714	0.986395
CM-CM	MYC-EIF4A1	-50.9285	10.21	1.63e-06	0.00121215	-5.1362	9.9156	0.011031	0.912738	0.028571	0.805685	0.38	0.852867	0.000695076	0.273493	-5.46	-0.9467	0.267714	0.97728
CM-CM	ESR1-MYC	-40.7302	7.4897	1.98e-06	0.00142727	-5.37	7.5848	0.006279	0.912738	0.028571	0.805685	0.7	1	0.0778887	0.000695076	-1.299	-5.46	0.963808	0.267714
CM-CM	MAP3K4-MAP2K6	33.174	6.9506	8.16e-05	0.0313017	4.1779	7.9404	0.008682	0.912738	0.028571	0.805685	0.24	0.729859	0.106667	0.00220014	0.4798	2.7459	0.963808	0.420938
CM-CM	MAP2K6-MAP3K4	33.174	6.5433	3.15e-05	0.0143664	4.1779	7.9404	0.008682	0.912738	0.028571	0.805685	0.22	0.701829	0.00220014	0.106667	2.7459	0.4798	0.420938	0.963808
CM-CM	MYC-CDC25A	-32.6145	6.5494	4.66e-05	0.0198928	-4.4625	7.3086	0.01138	0.912738	0.028571	0.805685	0.74	1	0.000695076	0.0957321	-5.46	0.4661	0.267714	0.963808
CM-CM	SEM1-BRCA2	-37.6639	6.8047	2.86e-05	0.0132023	-7.5061	5.0178	0.00106	0.73895	0.028571	0.805685	0.9	1	0.0823994	6.04e-06	-1.2767	-2.8445	0.963808	0.0368424
CM-CM	MYC-CCND2	-70.8375	13.001	7.52e-06	0.00435431	-6.2152	11.3974	0.001365	0.783789	0.028571	0.805685	0.8	1	0.000695076	0.0005557	-5.46	-3.2642	0.267714	0.238718
CM-CM	MYC-CDK4	-40.5103	7.5236	3.72e-06	0.00243911	-4.7668	8.4985	0.005317	0.912738	0.028571	0.805685	0.28	0.769683	0.000695076	0.300359	-5.46	-0.3296	0.267714	0.978962
CM-CM	CDK4-MYC	-40.5103	7.2963	1.31e-06	0.00100416	-4.7668	8.4985	0.005317	0.912738	0.028571	0.805685	0.18	0.649903	0.300359	0.000695076	-0.3296	-5.46	0.978962	0.267714
CM-CM	NRF1-EIF2S2	-26.6103	4.4696	6.25e-07	0.000537654	-6.7231	3.958	0.003733	0.912738	0.028571	0.805685	1	1	0.512789	0.000125164	0.1508	-2.6327	0.978962	0.133378
CM-CM	ERN1-MAPK8	-26.1554	4.4516	9.48e-07	0.000761771	-6.4793	4.0367	0.005211	0.912738	0.028571	0.805685	1	1	0.000134021	0.80445	-2.4403	0.0507	0.135484	0.98719
CM-CM	CCND2-CDK6	-35.4511	7.3076	1.67e-05	0.00848397	-4.2442	8.3528	0.006924	0.912738	0.028571	0.805685	0.26	0.750887	0.0005557	0.758364	-3.2642	-0.1352	0.238718	0.984239
CM-CM	CCND2-CDK4	-26.2389	5.1678	5.39e-06	0.00330331	-4.0719	6.4438	0.009853	0.912738	0.028571	0.805685	1	1	0.0005557	0.300359	-3.2642	-0.3296	0.238718	0.978962
CM-CM	CDK4-CCND2	-26.2389	5.2326	9.31e-05	0.0348272	-4.0719	6.4438	0.009853	0.912738	0.028571	0.805685	1	1	0.300359	0.0005557	-0.3296	-3.2642	0.978962	0.238718
CM-CM	EMSY-BRCA2	-32.7187	3.5801	0	0	-14.0776	2.3242	0.000114	0.459255	0.028571	0.805685	0.56	0.979773	0.584568	6.04e-06	0.1218	-2.8445	0.979433	0.0368424
CM-CM	CD28-GRB2	24.7593	4.8007	7.8e-05	0.0302185	9.1976	2.6919	0.00013	0.482428	0.028571	0.805685	0.18	0.649903	0.000230699	0.0242986	1.7083	0.611	0.161124	0.897842
CM-CM	MAX-MYC	-60.2548	11.1162	2.5e-05	0.0118345	-5.0226	11.9968	0.008182	0.912738	0.028571	0.805685	0.32	0.807536	0.296066	0.000695076	0.2672	-5.46	0.978962	0.267714
CM-CM	MYC-ZBTB17	-44.8032	8.357	8.45e-06	0.00479972	-5.1288	8.7356	0.005031	0.912738	0.028571	0.805685	0.72	1	0.000695076	0.918499	-5.46	-0.036	0.267714	0.995165
CM-CM	MAP3K5-MAP2K6	41.3869	7.995	1.55e-05	0.0079605	4.4804	9.2374	0.005127	0.912738	0.028571	0.805685	1	1	0.0314228	0.00220014	0.6993	2.7459	0.941593	0.420938
CM-CM	MAP2K6-MAP3K5	41.3869	8.328	7.14e-05	0.0281341	4.4804	9.2374	0.005127	0.912738	0.028571	0.805685	1	1	0.00220014	0.0314228	2.7459	0.6993	0.420938	0.941593
CM-CM	CISH-PRLR	36.579	6.1329	6.83e-08	8.33e-05	6.4689	5.6546	0.000988	0.724964	0.028571	0.805685	0.4	0.869191	0.046165	0.00045182	1.1092	2.6281	0.963808	0.217937
CM-CM	MYC-SMAD3	-53.297	10.3201	2.32e-06	0.00163814	-4.3537	12.2419	0.008717	0.912738	0.028571	0.805685	0.92	1	0.000695076	0.059745	-5.46	0.6535	0.267714	0.963808
CM-CM	FGFR2-FGF7	-82.5861	12.3183	1.85e-08	2.71e-05	-6.3632	12.9787	0.003541	0.912738	0.028571	0.805685	1	1	0.119615	0.00026469	-0.8597	-5.0906	0.963808	0.173961
CM-CM	FGF7-FGFR2	-82.5861	12.7931	5.24e-06	0.00322627	-6.3632	12.9787	0.003541	0.912738	0.028571	0.805685	1	1	0.00026469	0.119615	-5.0906	-0.8597	0.173961	0.963808
CM-CM	PBK-DUSP1	18.2324	3.5334	1.52e-05	0.00781315	4.567	3.9922	0.018824	0.912738	0.026519	0.805685	0.06	0.384333	0.000348938	0.0334582	2.0819	4.2688	0.193996	0.953185
CM-CM	MKNK1-MAPK14	-8.8897	1.4245	3.97e-10	1.04e-06	-4.0526	2.1936	0.018025	0.912738	0.028571	0.805685	0.24	0.729859	0.000536134	0.00198059	-1.6145	0.9363	0.235464	0.406035
CM-CM	MAPK14-MKNK1	-8.8897	1.3433	3.95e-08	5.2e-05	-4.0526	2.1936	0.018025	0.912738	0.028571	0.805685	0.14	0.580719	0.00198059	0.000536134	0.9363	-1.6145	0.406035	0.235464
CM-CM	MKNK1-EIF4E	-13.8796	1.7985	2.4e-11	9.09e-08	-5.7172	2.4277	0.002286	0.875371	0.028571	0.805685	0.7	1	0.000536134	0.112111	-1.6145	0.3772	0.235464	0.963808
CM-CM	MYC-SMAD2	-54.9378	10.4279	2.07e-05	0.0100947	-4.8135	11.4132	0.009167	0.912738	0.028571	0.805685	1	1	0.000695076	0.141283	-5.46	0.3615	0.267714	0.963808
CM-CM	INHBA-ACTR2	-55.8302	7.8627	2.81e-10	7.83e-07	-6.3079	8.8508	0.004592	0.912738	0.028571	0.805685	0.74	1	0.000148973	0.194967	-5.1617	-0.3758	0.140107	0.966272
CM-CM	PTPRT-STAT3	-78.8052	6.3985	0	0	-10.7084	7.3592	0.000124	0.472398	0.028571	0.805685	1	1	1.32e-06	0.449672	-6.9411	0.2149	0.018135	0.978962
CM-CM	GRK6-LRP6	28.3373	5.3666	2.12e-05	0.010319	6.0903	4.6528	0.002398	0.886472	0.028571	0.805685	0.42	0.887979	0.00142858	0.0258507	2.1015	0.608	0.35836	0.909879
CM-CM	PRKD1-YWHAQ	24.3824	5.4224	2.94e-05	0.0135189	5.6045	4.3505	0.004527	0.912738	0.028571	0.805685	0.78	1	0.00194933	0.323881	2.1842	0.2785	0.404502	0.978962
CM-CM	PARD3-TIAM1	20.3177	3.9699	3.09e-05	0.014102	6.016	3.3773	0.000951	0.717823	0.028571	0.805685	0.38	0.852867	0.295307	0.000727396	0.2835	1.3294	0.978962	0.271758
CM-CM	CD28-CBLB	27.2346	4.1483	5.57e-08	7e-05	8.1415	3.3451	0.000318	0.622241	0.028571	0.805685	0.86	1	0.000230699	0.0434727	1.7083	0.7273	0.161124	0.963808
CM-CM	ACVR2A-INHBA	-57.5416	8.516	2.08e-08	3.01e-05	-6.6299	8.6791	0.005956	0.912738	0.028571	0.805685	0.64	1	0.775179	0.000148973	-0.0656	-5.1617	0.984537	0.140107
CM-CM	INHBA-ACVR2A	-57.5416	8.1047	5.98e-10	1.47e-06	-6.6299	8.6791	0.005956	0.912738	0.028571	0.805685	0.64	1	0.000148973	0.775179	-5.1617	-0.0656	0.140107	0.984537
CM-CM	INHBA-ACVR1B	-40.0199	5.2736	1e-12	5.04e-09	-5.471	7.315	0.008373	0.912738	0.028571	0.805685	0.44	0.903094	0.000148973	0.00896235	-5.1617	0.8642	0.140107	0.683593
CM-CM	ACVR1B-INHBA	-40.0199	5.1088	7.9e-11	2.57e-07	-5.471	7.315	0.008373	0.912738	0.028571	0.805685	0.34	0.822069	0.00896235	0.000148973	0.8642	-5.1617	0.683593	0.140107
CM-CM	INHA-ACVR1B	16.8467	3.3635	4.69e-05	0.0200021	6.9089	2.4384	0.002399	0.886472	0.028571	0.805685	0.34	0.822069	0.00666466	0.00896235	1.1284	0.8642	0.621925	0.683593
CM-CM	LIF-IL6ST	21.6476	4.7328	9.05e-05	0.0340954	4.0606	5.3311	0.013448	0.912738	0.026519	0.805685	0.88	1	0.00103111	0.00403918	2.1808	-1.8819	0.312097	0.526304
CM-CM	OSTN-NPR3	-87.9941	5.0459	0	0	-15.8658	5.5461	0.000537	0.643809	0.028571	0.805685	0.1	0.497333	1.23e-09	0.0619724	-9.7863	-1.3602	0.000150726	0.963808
CM-CM	CAMK2A-TIAM1	26.2903	4.9286	8.51e-06	0.00482717	7.5527	3.4809	0.00029	0.615161	0.028571	0.805685	0.12	0.539527	0.00129851	0.000727396	1.3494	1.3294	0.343602	0.271758
CM-CM	ADRA1A-GNAQ	33.2021	6.8855	0.000137699	0.0474703	5.1043	6.5048	0.007979	0.912738	0.028571	0.805685	0.06	0.384333	0.00210519	0.145088	2.3403	0.4715	0.415268	0.963808
CM-CM	ARHGEF2-ARHGAP1	-42.5742	6.7323	1.16e-08	1.84e-05	-6.6859	6.3678	0.002606	0.904275	0.028571	0.805685	0.26	0.750887	4.71e-05	0.0375006	-3.486	-1.4056	0.0826169	0.963808
CM-CM	MAPK14-DUSP10	25.8388	5.1453	6.51e-05	0.0260955	8.5037	3.0386	0.000145	0.4995	0.028571	0.805685	1	1	0.00198059	0.000966377	0.9363	1.5324	0.406035	0.302341
CM-CM	DUSP10-MAPK14	25.8388	5.1132	3.52e-05	0.0157506	8.5037	3.0386	0.000145	0.4995	0.028571	0.805685	0.92	1	0.000966377	0.00198059	1.5324	0.9363	0.302341	0.406035
CM-CM	CAMK2A-KCND2	39.7565	7.1068	2.66e-05	0.0124569	7.7404	5.1363	0.000386	0.633106	0.028571	0.805685	0.42	0.887979	0.00129851	0.000290089	1.3494	1.7398	0.343602	0.179411
CM-CM	MAPK14-NFATC1	24.0663	5.0991	0.000117898	0.0419744	8.4817	2.8374	0.002599	0.903824	0.028571	0.805685	0.94	1	0.00198059	0.00153033	0.9363	1.4125	0.406035	0.369801
CM-CM	PRKACA-NFATC1	21.0957	4.0105	5.3e-06	0.00325415	14.7891	1.4264	2.7e-05	0.306809	0.028571	0.805685	1	1	0.0312601	0.00153033	0.7813	1.4125	0.940291	0.369801
CM-CM	CAMK2A-DLG1	18.7176	4.2845	0.000141367	0.048459	4.7968	3.9021	0.003028	0.912738	0.028571	0.805685	0.16	0.615014	0.00129851	0.686705	1.3494	0.0884	0.343602	0.981022
CM-CM	BIK-BCL2	12.7907	1.615	2.9e-11	1.07e-07	7.9096	1.6171	0.000934	0.715785	0.028571	0.805685	0.64	1	0.000188707	0.0640549	2.0777	-0.6966	0.149515	0.963808
CM-CM	BCL2-BIK	12.7907	1.6952	3.29e-10	8.93e-07	7.9096	1.6171	0.000934	0.715785	0.028571	0.805685	0.76	1	0.0640549	0.000188707	-0.6966	2.0777	0.963808	0.149515
CM-CM	ANK1-ITPR1	24.6767	4.6072	7.29e-06	0.00424546	6.6921	3.6874	0.004006	0.912738	0.028571	0.805685	0.2	0.676998	0.0374871	0.00107911	0.7226	1.3654	0.963808	0.317988
CM-CM	SESN2-SQSTM1	-61.0769	5.8431	0	0	-12.8049	4.7698	3.7e-05	0.332229	0.028571	0.805685	0.88	1	1.79e-06	0.0357288	-4.7975	-0.6451	0.0224053	0.962277
CM-CM	NOD1-MAPK14	35.1973	6.1234	1.57e-06	0.00116824	7.7024	4.5697	0.002253	0.872824	0.028571	0.805685	0.18	0.649903	0.000390664	0.00198059	2.4409	0.9363	0.204194	0.406035
CM-CM	NOD1-MAPK8	27.1798	4.6478	3.32e-07	0.000319722	6.5688	4.1377	0.006502	0.912738	0.028571	0.805685	1	1	0.000390664	0.80445	2.4409	0.0507	0.204194	0.98719
CM-CM	NOD1-CASP9	20.6794	3.758	1.96e-05	0.0096828	5.0301	4.1111	0.002899	0.912738	0.028571	0.805685	0.4	0.869191	0.000390664	0.204773	2.4409	0.3863	0.204194	0.968638
CM-CM	DLG1-PBK	27.5247	4.5466	7.07e-06	0.00413609	6.5587	4.1966	0.004801	0.912738	0.026519	0.805685	0.94	1	0.686705	0.000348938	0.0884	2.0819	0.981022	0.193996
CM-CM	PBK-DLG1	27.5247	4.5121	3.04e-06	0.00205654	6.5587	4.1966	0.004801	0.912738	0.026519	0.805685	0.92	1	0.000348938	0.686705	2.0819	0.0884	0.193996	0.981022
CM-CM	SNTA1-SCN4A	81.2489	15.5188	2.74e-06	0.00187936	4.6755	17.3774	0.014687	0.912738	0.029401	0.805685	0.18	0.649903	0.259645	0.000793936	-0.4356	6.6493	0.974822	0.281901
CM-CM	PKN1-ARHGEF2	-33.5188	5.0538	5.6e-09	9.97e-06	-8.2966	4.04	0.00049	0.643809	0.028571	0.805685	0.9	1	0.397931	4.71e-05	0.2166	-3.486	0.978962	0.0826169
CM-CM	MAPK14-JDP2	-23.2854	4.3897	1.86e-05	0.00924498	-3.737	6.2311	0.012958	0.912738	0.028571	0.805685	1	1	0.00198059	0.000803828	0.9363	-2.8196	0.406035	0.281901
CM-CM	PHKG1-MAPT	33.4077	7.6226	0.000119233	0.0423218	4.0601	8.2283	0.007114	0.912738	0.028571	0.805685	0.32	0.807536	0.000805414	0.437504	2.3621	0.3766	0.281901	0.978962
CM-CM	TET2-OGT	7.0671	1.1832	2.26e-07	0.000230559	4.0643	1.7388	0.00901	0.912738	0.028571	0.805685	1	1	0.0049116	0.0377887	1.0378	-0.5489	0.556884	0.963808
CM-CM	TSSK4-CREB1	19.3003	3.1309	4.56e-05	0.0195302	7.7474	2.4912	0.002212	0.869826	0.028571	0.805685	0.42	0.887979	0.000307964	0.60059	1.7204	0.1074	0.185678	0.979433
CM-CM	MARK2-ARHGEF2	-42.181	5.4952	1.18e-10	3.66e-07	-8.1809	5.156	0.000261	0.609304	0.028571	0.805685	0.26	0.750887	0.731957	4.71e-05	-0.0801	-3.486	0.982516	0.0826169
CM-CM	RASGEF1A-NRAS	-39.3512	4.7657	0	0	-12.8961	3.0514	6.6e-05	0.389076	0.028571	0.805685	0.58	0.993964	2.19e-05	0.084464	-3.9458	-0.9563	0.0632914	0.963808
CM-CM	DEPTOR-MTOR	-25.902	4.3148	2.32e-07	0.000235793	-6.7099	3.8602	0.001848	0.837664	0.028571	0.805685	0.96	1	0.000115695	0.753521	-2.4348	0.074	0.131439	0.983861
CM-CM	MTOR-DEPTOR	-25.902	4.4064	1.96e-06	0.00141314	-6.7099	3.8602	0.001848	0.837664	0.028571	0.805685	0.98	1	0.753521	0.000115695	0.074	-2.4348	0.983861	0.131439
CM-CM	DOT1L-MYC	-63.2885	12.3423	3.72e-05	0.0164843	-4.8454	13.0617	0.007916	0.912738	0.028571	0.805685	0.58	0.993964	0.161386	0.000695076	0.3902	-5.46	0.96517	0.267714
CM-CM	HDAC7-PLAG1	29.0743	4.1131	9.6e-11	3.06e-07	8.2204	3.5369	0.000695	0.664811	0.028571	0.805685	0.72	1	0.000107699	0.0767758	2.2595	0.5866	0.126885	0.963808
CM-CM	HDAC7-PLAGL2	25.9958	4.6247	4.68e-06	0.00293542	11.1416	2.3332	0.000381	0.630603	0.028571	0.805685	1	1	0.000107699	0.00930896	2.2595	0.8501	0.126885	0.692835
CM-CM	JDP2-ATF2	-31.5129	6.1562	6.73e-05	0.0268115	-5.2898	5.9573	0.003009	0.912738	0.028571	0.805685	0.18	0.649903	0.000803828	0.844865	-2.8196	0.0463	0.281901	0.989911
CM-CM	TM9SF4-ATP6V1H	-20.4114	3.9626	5.05e-05	0.0212176	-7.6465	2.6694	0.004489	0.912738	0.028571	0.805685	1	1	0.520571	0.000121663	-0.1712	-1.7353	0.978962	0.132683
CM-CM	RND1-MAPK8	-44.3056	6.4062	1.56e-09	3.35e-06	-6.7002	6.6125	0.004297	0.912738	0.028571	0.805685	1	1	0.000127852	0.80445	-4.0654	0.0507	0.133964	0.98719
CM-CM	SEMA4D-PLXNB1	34.4629	5.12	4.22e-09	7.86e-06	9.4498	3.6469	0.000137	0.488597	0.028571	0.805685	0.38	0.852867	0.00143606	6.84e-05	1.2055	2.6675	0.359256	0.100405
CM-CM	PLXNB1-SEMA4D	34.4629	5.0069	5.12e-09	9.23e-06	9.4498	3.6469	0.000137	0.488597	0.028571	0.805685	0.38	0.852867	6.84e-05	0.00143606	2.6675	1.2055	0.100405	0.359256
CM-CM	FGF13-SCN4A	114.776	21.7113	4.83e-05	0.0204703	5.0326	22.8066	0.009734	0.912738	0.029401	0.805685	0.26	0.750887	0.0124584	0.000793936	0.7858	6.6493	0.765096	0.281901
CM-CM	FGF14-SCN4A	99.8809	16.9616	1.36e-06	0.00103893	6.2125	16.0774	0.004509	0.912738	0.029401	0.805685	0.28	0.769683	9.45e-06	0.000793936	2.9686	6.6493	0.0490427	0.281901
CM-CM	FGF14-SCN5A	47.6564	5.5969	0	0	11.1049	4.2915	0.000609	0.646336	0.028571	0.805685	0.44	0.903094	9.45e-06	0.121403	2.9686	0.52	0.0490427	0.963808
CM-CM	ARHGEF2-RHOA	-36.1696	6.879	5.56e-06	0.00338973	-5.0474	7.166	0.012046	0.912738	0.028571	0.805685	1	1	4.71e-05	0.828262	-3.486	-0.1157	0.0826169	0.989071
CM-CM	RHOA-ARHGEF2	-36.1696	7.0126	3.1e-05	0.0141558	-5.0474	7.166	0.012046	0.912738	0.028571	0.805685	1	1	0.828262	4.71e-05	-0.1157	-3.486	0.989071	0.0826169
CM-CM	PBK-PRDX1	20.3982	3.7703	3.59e-06	0.00237061	6.2284	3.275	0.005793	0.912738	0.026519	0.805685	0.26	0.750887	0.000348938	0.390643	2.0819	1.1289	0.193996	0.978962
CM-CM	ARHGEF17-RHOA	37.4517	7.7014	3.86e-05	0.0170211	3.8689	9.6801	0.008977	0.912738	0.028571	0.805685	0.3	0.789097	0.000399574	0.828262	3.7956	-0.1157	0.206108	0.989071
CM-CM	NEDD4L-SCN4A	83.6719	14.8271	4.13e-06	0.00265235	5.0269	16.6449	0.008318	0.912738	0.029401	0.805685	1	1	0.0945399	0.000793936	0.6157	6.6493	0.963808	0.281901
CM-CM	AKT1-TRIB3	-70.8922	10.7145	4.29e-07	0.000395496	-6.0211	11.774	0.001203	0.764432	0.029401	0.805685	1	1	0.606456	2.69e-06	0.5721	-9.9775	0.979433	0.0254785
CM-CM	TRIB3-AKT1	-70.8922	10.1007	1.53e-09	3.28e-06	-6.0211	11.774	0.001203	0.764432	0.029401	0.805685	1	1	2.69e-06	0.606456	-9.9775	0.5721	0.0254785	0.979433
CM-CM	WNK3-SLC12A2	-25.6164	4.0583	2.37e-07	0.000239532	-5.4229	4.7238	0.006527	0.912738	0.028571	0.805685	1	1	0.000424653	0.0258763	-1.8208	-1.1598	0.21205	0.910446
CM-CM	WNK3-WNK1	-22.5639	4.2909	9.73e-06	0.00540333	-6.0485	3.7305	0.001272	0.772679	0.028571	0.805685	0.9	1	0.000424653	0.127974	-1.8208	0.3808	0.21205	0.963808
CM-CM	WNK3-SLC12A6	-20.1286	3.8563	4.12e-05	0.0179858	-6.01	3.3492	0.001297	0.774711	0.028571	0.805685	0.76	1	0.000424653	0.339669	-1.8208	0.2353	0.21205	0.978962
CM-CM	WNK3-SLC12A4	-20.2212	3.6183	1.01e-05	0.00557829	-7.0924	2.8511	0.000844	0.699166	0.028571	0.805685	0.18	0.649903	0.000424653	0.146345	-1.8208	-0.4157	0.21205	0.963808
CM-CM	NSD3-MYC	-68.1574	12.4782	9.9e-06	0.00548085	-4.9725	13.707	0.006697	0.912738	0.028571	0.805685	1	1	0.812805	0.000695076	-0.0528	-5.46	0.988038	0.267714
CM-CM	CAMK2A-ATP2A2	30.6515	5.2088	5.98e-07	0.000519048	6.6236	4.6276	0.000576	0.643809	0.028571	0.805685	1	1	0.00129851	0.0189229	1.3494	0.8179	0.343602	0.848871
CM-CM	CAMK2A-SMAD2	17.9883	3.7761	0.00014383	0.0491398	5.608	3.2076	0.00306	0.912738	0.028571	0.805685	0.28	0.769683	0.00129851	0.141283	1.3494	0.3615	0.343602	0.963808
CM-CM	CAMK2A-CYLD	20.8599	4.0538	2.04e-05	0.0100156	5.7218	3.6457	0.001281	0.772754	0.028571	0.805685	0.76	1	0.00129851	0.0538572	1.3494	0.6023	0.343602	0.963808
CM-CM	CAMK2A-NCOR2	20.8183	4.2263	0.000106079	0.0385859	6.3586	3.274	0.000711	0.669237	0.028571	0.805685	0.22	0.701829	0.00129851	0.0586425	1.3494	0.6437	0.343602	0.963808
CM-CM	NOD1-ATG16L1	24.5277	4.4143	8.14e-06	0.00465685	5.7035	4.3005	0.010637	0.912738	0.028571	0.805685	0.24	0.729859	0.000390664	0.784089	2.4409	-0.0591	0.204194	0.985468
CM-CM	GRIP1-KIF5C	-20.3981	3.4862	9.16e-06	0.00513312	-6.9107	2.9517	0.000513	0.643809	0.028571	0.805685	0.94	1	0.0663135	0.000538885	-0.683	-1.8916	0.963808	0.235835
CM-CM	WNK2-WNK1	25.1442	4.7731	4.05e-06	0.00260694	6.9739	3.6055	0.00095	0.717823	0.028571	0.805685	0.46	0.917918	0.00128975	0.127974	1.5036	0.3808	0.342913	0.963808
CM-CM	PHKG1-PYGM	33.188	5.9759	3.54e-06	0.00233905	5.3855	6.1625	0.008901	0.912738	0.028571	0.805685	0.94	1	0.000805414	0.138678	2.3621	0.4035	0.281901	0.963808
CM-CM	PHKA2-PHKG1	43.2055	8.9699	1.8e-05	0.00903348	5.3965	8.0062	0.010377	0.912738	0.028571	0.805685	0.52	0.957827	0.00424077	0.000805414	1.7867	2.3621	0.536124	0.281901
CM-CM	PHKA2-PHKG2	19.6302	4.2079	0.000145073	0.0494739	4.7349	4.1458	0.008124	0.912738	0.028571	0.805685	0.88	1	0.00424077	0.057596	1.7867	0.5072	0.536124	0.963808
CM-CM	PRKACA-PHKA2	25.9674	5.3103	4.26e-05	0.0184682	7.44	3.4903	0.000933	0.715785	0.028571	0.805685	0.6	1	0.0312601	0.00424077	0.7813	1.7867	0.940291	0.536124
CM-CM	CCAR2-SUV39H1	30.9564	5.6981	1.45e-05	0.00753537	5.0085	6.1808	0.011904	0.912738	0.028571	0.805685	0.64	1	0.535218	0.000673608	0.2058	4.0515	0.978962	0.265524
CM-CM	CSNK1A1-FOXO6	23.5805	3.7331	1.63e-07	0.000174629	8.772	2.6882	0.00043	0.642622	0.028571	0.805685	0.7	1	0.286401	0.000265119	0.2529	1.7036	0.978599	0.173961
CM-CM	PTPN1-ROS1	-37.3515	5.3059	2.1e-09	4.32e-06	-6.9068	5.4079	0.000458	0.642622	0.028571	0.805685	0.08	0.450284	0.559941	0.000120045	0.1417	-4.0883	0.979433	0.132547
CM-CM	SKP2-MYC	-39.7553	6.8832	1.83e-06	0.00133457	-6.3386	6.272	0.002418	0.887988	0.028571	0.805685	0.6	1	0.0337487	0.000695076	-1.2782	-5.46	0.954768	0.267714
CM-CM	BCORL1-HDAC7	24.2722	4.6802	1.38e-05	0.0072377	4.1217	5.8888	0.006274	0.912738	0.028571	0.805685	0.44	0.903094	0.126018	0.000107699	0.7824	2.2595	0.963808	0.126885
CM-CM	MARK2-HDAC7	26.0856	4.2056	3.32e-08	4.5e-05	7.486	3.4846	0.0003	0.617108	0.028571	0.805685	0.6	1	0.731957	0.000107699	-0.0801	2.2595	0.982516	0.126885
CM-CM	PRKCB-SLC6A9	-46.6916	7.1609	9.67e-08	0.000112332	-5.8195	8.0233	0.00276	0.912738	0.028571	0.805685	0.34	0.822069	0.601801	0.00021963	-0.2094	-5.8347	0.979433	0.159745
CM-CM	MET-GRB2	-13.9751	2.9403	3.09e-05	0.0141001	-3.477	4.0193	0.013401	0.912738	0.057143	0.941553	0.14	0.580719	0.00236671	0.0242986	-1.7275	0.611	0.429778	0.897842
CM-CM	PIM1-MYC	-54.4759	10.0251	3.81e-06	0.00248424	-4.7589	11.4472	0.00601	0.912738	0.028571	0.805685	0.28	0.769683	0.702539	0.000695076	0.1373	-5.46	0.981291	0.267714
CM-CM	CDK4-RUNX3	-9.5816	1.9635	4.91e-05	0.0207535	-6.5851	1.455	0.0025	0.895088	0.028571	0.805685	0.32	0.807536	0.300359	0.00106344	-0.3296	-1.1736	0.978962	0.316422
CM-CM	PRKCA-NFATC1	24.7598	4.6201	2.19e-05	0.0106072	5.4148	4.5727	0.00485	0.912738	0.028571	0.805685	0.46	0.917918	0.0436018	0.00153033	0.7065	1.4125	0.963808	0.369801
CM-CM	PRKCA-SLC6A9	-73.3162	11.5999	1.31e-07	0.000145034	-5.5698	13.1633	0.006366	0.912738	0.028571	0.805685	0.3	0.789097	0.0436018	0.00021963	0.7065	-5.8347	0.963808	0.159745
CM-CM	PRKCA-RGS7	27.0407	4.7577	1.28e-06	0.000985343	10.6321	2.5433	0.000128	0.478781	0.028571	0.805685	0.6	1	0.0436018	0.000739073	0.7065	1.5191	0.963808	0.272381
CM-CM	PRKACA-RGS13	29.2416	4.3631	1.05e-08	1.69e-05	9.3007	3.144	9.1e-05	0.423556	0.028571	0.805685	1	1	0.0312601	0.000275609	0.7813	2.3445	0.940291	0.17718
CM-CM	PRKACA-TFAP2A	19.6231	3.8871	8.75e-05	0.0331106	4.93	3.9803	0.013884	0.912738	0.028571	0.805685	1	1	0.0312601	0.0017165	0.7813	1.8905	0.940291	0.385563
CM-CM	JAK2-MYC	-51.3199	9.7316	6.04e-06	0.00363936	-4.4892	11.4319	0.007998	0.912738	0.028571	0.805685	0.66	1	0.359026	0.000695076	0.2861	-5.46	0.978962	0.267714
CM-CM	RPS6KB1-DEPTOR	-27.7222	4.3687	6.51e-08	7.99e-05	-6.2628	4.4265	0.002076	0.859462	0.028571	0.805685	1	1	0.900264	0.000115695	0.0274	-2.4348	0.994074	0.131439
CM-CM	MAPK10-PPM1J	27.9789	5.5559	2.62e-05	0.012287	5.5447	5.0461	0.005116	0.912738	0.028571	0.805685	0.3	0.789097	0.0289383	0.00282208	1.0611	1.695	0.927927	0.461643
CM-CM	HDAC4-MEF2D	23.6172	4.208	1.07e-05	0.00585537	7.6435	3.0898	0.000273	0.610334	0.028571	0.805685	0.74	1	0.000248293	0.25001	1.6519	0.3032	0.169866	0.97337
CM-CM	PPP2CA-HDAC7	26.1309	4.1817	1.04e-07	0.000119591	8.948	2.9203	0.000132	0.485363	0.028571	0.805685	1	1	0.753677	0.000107699	0.0681	2.2595	0.983861	0.126885
CM-CM	PAK1-ARHGEF2	-32.2813	6.5266	2.69e-05	0.0125556	-4.8634	6.6376	0.003224	0.912738	0.028571	0.805685	0.14	0.580719	0.0363616	4.71e-05	-1.4786	-3.486	0.963808	0.0826169
CM-CM	CAMK2D-HDAC4	24.2215	5.0149	0.000135519	0.0468754	7.0625	3.4296	0.000405	0.636746	0.028571	0.805685	0.52	0.957827	0.933322	0.000248293	-0.0239	1.6519	0.996329	0.169866
CM-CM	DYRK1A-FOXO6	20.892	3.7744	2.85e-06	0.00194581	6.1308	3.4077	0.001566	0.808987	0.028571	0.805685	0.62	1	0.695807	0.000265119	-0.0949	1.7036	0.981022	0.173961
CM-CM	CREBBP-MYBL1	-57.386	6.2022	0	0	-10.2431	5.6024	0.000157	0.505245	0.028571	0.805685	0.56	0.979773	0.226881	1.18e-05	0.3158	-4.6867	0.97053	0.0522426
CM-CM	NFIB-NFIX	23.7095	5.3104	0.000142167	0.0486743	5.2529	4.5136	0.004035	0.912738	0.028571	0.805685	0.22	0.701829	0.0741862	0.00489852	0.628	1.1549	0.963808	0.55663
CM-CM	PTPRT-PXN	-61.6627	5.9616	0	0	-10.9918	5.6099	7e-05	0.392824	0.028571	0.805685	0.6	1	1.32e-06	0.316076	-6.9411	0.3784	0.018135	0.978962
[truncated: 7,739 more rows]
